# Supplementary material for: Additional Biomarkers beyond RAS That Impact the Efficacy of Cetuximab plus Chemotherapy in mCRC: A Retrospective Biomarker Analysis
Source: PubMed Central journal article supplement (PMC6165607; doi:10.1155/2018/5072987), 2018-09-16
Supplement: 5072987.f1.pdf [file 5072987.f1.pdf]

## Supplementary Materials

|                                                                                                     |     |
|-----------------------------------------------------------------------------------------------------|-----|
| <b>Supplementary Methods</b> .....                                                                  | 2   |
| Tissue collection.....                                                                              | 2   |
| Whole exome sequencing.....                                                                         | 2   |
| Primary processing of WES data .....                                                                | 2   |
| Target capture sequencing .....                                                                     | 3   |
| <b>Supplementary Results</b> .....                                                                  | 4   |
| Summary of WES.....                                                                                 | 4   |
| <b>Supplementary Figures</b> .....                                                                  | 5   |
| Figure S1 Kaplan-Meier curves according to RAS status.....                                          | 5   |
| Figure S2 Kaplan-Meier curves according to model defined groups in training cohort. ....            | 6   |
| Figure S3 Kaplan-Meier curves according to model defined groups in validation cohort.....           | 7   |
| Figure S4 Workflow (A) and variant analysis (B) of WES data. ....                                   | 8   |
| Figure S5 Summary of driver mutations identified by WES.....                                        | 8   |
| <b>Supplementary Tables</b> .....                                                                   | 9   |
| Table S1. Clinical and pathologic characteristics of patients using for whole exome sequencing..... | 9   |
| Table S2. Summary of primary assessing of whole exome sequencing data .....                         | 10  |
| Table S5. List of genes analyzed using target capture sequencing.....                               | 12  |
| Table S6. Summary of RAS mutations.....                                                             | 13  |
| Table S7. Summary of detected mutations of RAS, BRAF, PI3KCA and genes included in the model.....   | 14  |
| Table S8. Efficacy outcomes according to PI3KCA and BRAF status in RAS wild-type patients.....      | 23  |
| Table S9. Summary of the first-step procedure of selecting potential predictive biomarker .....     | 25  |
| Table S10. Summary of the second-step procedure of selecting potential predictive biomarker .....   | 28  |
| Table S11. Efficacy outcomes according to mutation status in RAS wild-type patients. ....           | 29  |
| Table S12. Predictor value and coefficients in the predictive model .....                           | 30  |
| Table S13. Predictive model and primary tumor location .....                                        | 31  |
| Table S2. Driver somatic mutations detected by WES.....                                             | 33  |
| Table S3. Summary of searching results for metastases related genes in GeneRIF database .....       | 186 |
| <b>Supplementary references</b> .....                                                               | 242 |

## SUPPLEMENTARY METHODS

### Tissue collection

Fresh tissue was collected from colectomy specimens and metastatic nodules in the liver during surgery. Subsequently, the samples were frozen in liquid nitrogen and stored at -80 degrees centigrade. Formalin-fixed paraffin-embedded (FFPE) tissue was obtained from the Department of Pathology of Zhongshan Hospital (Shanghai, China). For sequencing, 6  $\mu\text{m}$  frozen sections from fresh tissue and 10  $\mu\text{m}$  sections from FFPE tissue were stained with hematoxylin and eosin. An experienced pathologist reviewed each section and indicated the area of the tumor. Macro-dissection was performed using the H&E-stained slides to enrich the number of tumor cells in each sample.

### Whole exome sequencing

DNA was extracted from fresh tumor samples using the MELT™ Total Nucleic Acid Isolation Kit (Life Technologies). Quantity and quality were assessed using Qubit 2.0 (Life Technologies). 50-100ng of DNA for each sample was used for exome capture and library preparation with Ion AmpliSeq™ Exome Kit 4xDuo (Life Technologies) following manufacturer's instructions. Then libraries were bar-coded with Ion Xpress™ Barcode Adapters Kit (Life Technologies). The concentration of each library was determined by qPCR with the Ion Library™ Quantization Kit (Life Technologies). According to the manufacturer's instructions, all libraries were diluted to 100pM working solutions and then pooled as needed to perform the template preparation with Ion PI™ Template OT2 200 kit v2 (Life Technologies) on Ion One Touch™ 2 System. Quality and quantity were determined with Qubit Ion Sphere™ Quality Control Kit (Life Technologies) for the obtained ion sphere particles (ISPs). Whole exome sequencing was performed on Ion Proton™ platform, using the Ion PI™ Sequencing 200 kit v2 and Ion PI™ Chip kit v2. Sequencing data was analyzed with the Torrent Suite™ Software v4.0 (Life Technologies) using default parameters setting.

### Primary processing of WES data

The primary whole exome sequencing data were analyzed for single nucleotide variants (SNVs) and insertions and deletions (InDels) following the procedures indicated below. The work flow is shown in **Figure S4** and results were summarized in **Table S2, S3 and Figure S5**.

(1) Variants with SNV quality (QUAL)  $\leq 20$  were excluded. QUAL was calculated using Torrent Suite™ software.

(2) Variants of normal mucosa were considered background variants. Primary or metastatic tumor samples were filtered using background variants, and the variants were rejected as germ-line variants or sequencing artifacts when present in the corresponding normal samples.

(3) Primary or metastatic tumor-specific SNVs were analyzed using the SeattleSeq SNP Annotation (<http://snp.gs.washington.edu/SeattleSeqAnnotation138/>). Known germ-line mutations from the Exome Sequencing Project (ESP) (<http://evs.gs.washington.edu/EVS/>) and dbSNP databases (build 140) (<http://www.ncbi.nlm.nih.gov/projects/SNP/>) were also excluded. We selected non-silent mutations, including missense mutations and InDels.

(4) Non-silent mutations were predicted to affect gene function when any of the following criteria were fulfilled: a. functional impact score of SIFT[1]  $\leq 0.05$  (<http://sift.jcvi.org/>); b. functional impact score of PolyPhen-2[2]  $> 0.45$  (<http://genetics.bwh.harvard.edu/pph2/>); c. functional impact label of Mutation Assessor[3] was "medium" or "high" (<http://mutationassessor.org/>); d. Condel[4] label was "deleterious" (<http://bg.upf.edu/fannsd/b/>); e. functional impact score of FATHMM[5]  $< 0$  (<http://fathmm.biocompute.org.uk/>).

(5) The transFIC analysis was performed as previously described[6]. Mutations were considered cancer driver mutations when the outcome of the transFIC analysis was "high impact".

### **Target capture sequencing**

DNA was extracted from FFPE tumor samples using the RecoverAll™ Total Nucleic Acid Isolation Kit (Life Technologies) according to the manufacturer's instructions. Quantity and quality were assessed using Qubit 2.0 (Life Technologies). 10ng of DNA for each sample was used for library construction and template preparation with same procedures described above in the "whole exome sequencing" section. Target capture sequencing was carried out with customized panel using the Ion PGM™ platform (Life Technologies) according to the manufacturer's instructions. The panel consisted of two separate PCR primer pools and produced a total of 1712 amplicons covering recurrent mutations in 100 genes with 1500X sequence coverage on Ion™ 318 chip. Sequencing data was analyzed with Ion Reporter™ software v4.4 (Life Technologies) using default parameters setting.

## SUPPLEMENTARY RESULTS

### Summary of WES

We performed WES for 10 triplets, each comprising tissue from the primary colorectal tumor, normal colorectal mucosa and matched liver metastases (**Table S1**). Overall, we identified 608 potential somatic driver mutations in 511 genes in primary colorectal tumors and 694 potential somatic driver mutations in 638 genes in liver metastases (**Table S3**). The number of somatic mutations in 10 primary colorectal tumor ranged from 41 to 87, with a mean of 60 (**Figure S5**), which was not significantly different from that of the non-hyper-mutated CRCs reported in The Cancer Genome Atlas (TCGA)[8]. Among these mutations, 10 and 278 were documented in the Catalog of Somatic Mutations in Cancer (COSMIC) and dbSNP databases (build 140), respectively. When comparing mutations between tumors, 230 mutations in 219 genes were universal in the primary tumor and corresponding liver metastases. In addition, mutations observed in 10 patients were predominated by the C/G>T/A transition (**Figure S5**), consistent with the results of previous CRC genomics studies [8, 9].

## SUPPLEMENTARY FIGURES

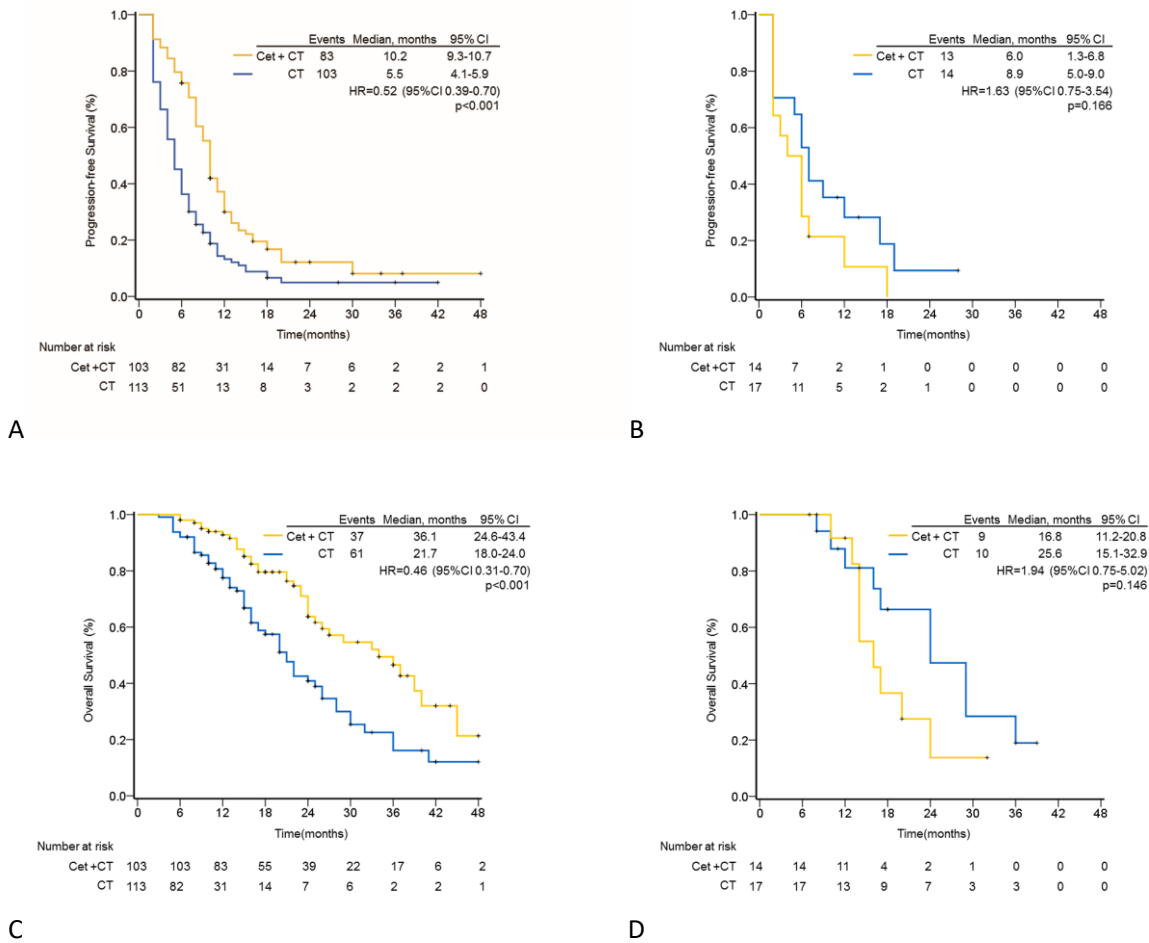

**Figure S1 Kaplan-Meier curves according to RAS status.** (A) PFS for patients with RAS mutations. (B) PFS for RAS assessable patients. (C) OS for patients with wild-type RAS. (D) OS for patients with RAS mutations.

Abbreviations: PFS, progression-free survival; OS, overall survival; cet, cetuximab; CT, chemotherapy; HR, hazard ratio.

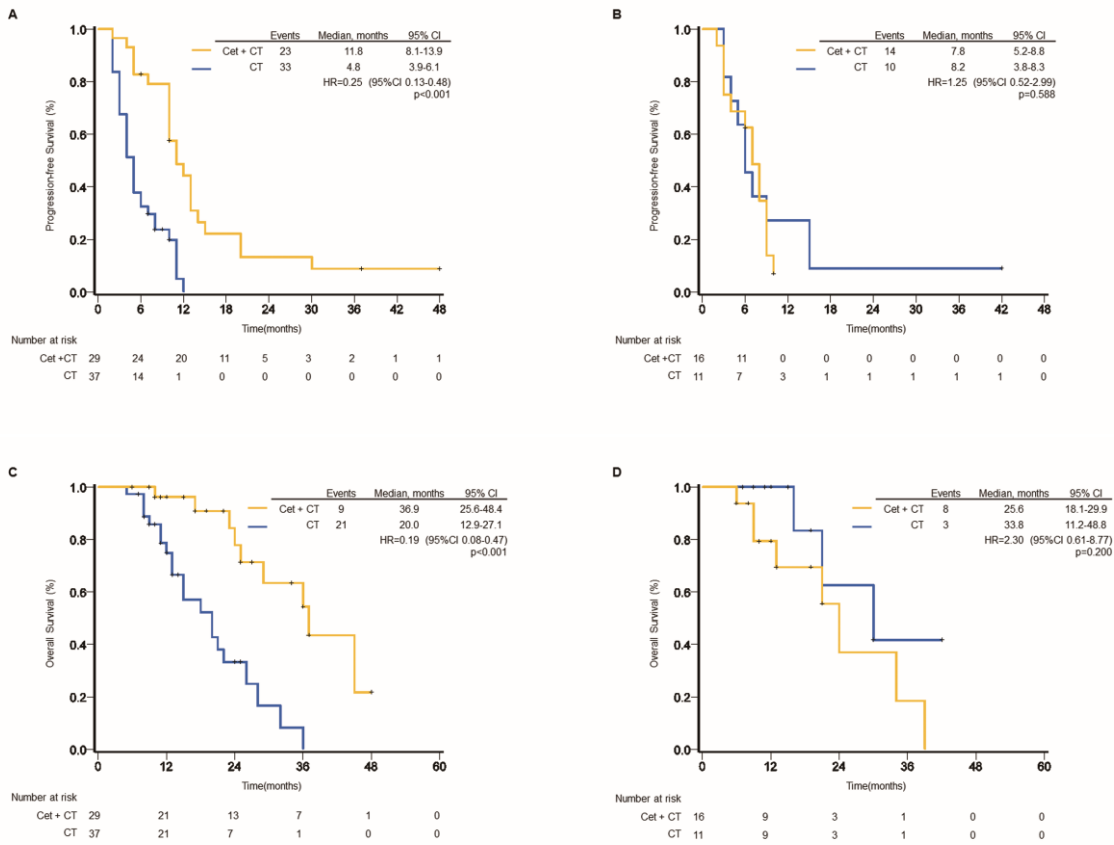

**Figure S2 Kaplan-Meier curves according to model defined groups in training cohort.**

(A) PFS for the responsive group. (B) PFS for the refractory group. (C) OS for the responsive group.

(D) OS for the refractory group.

Abbreviations: PFS, progression-free survival; OS, overall survival; cet, cetuximab; CT, chemotherapy; HR, hazard ratio.

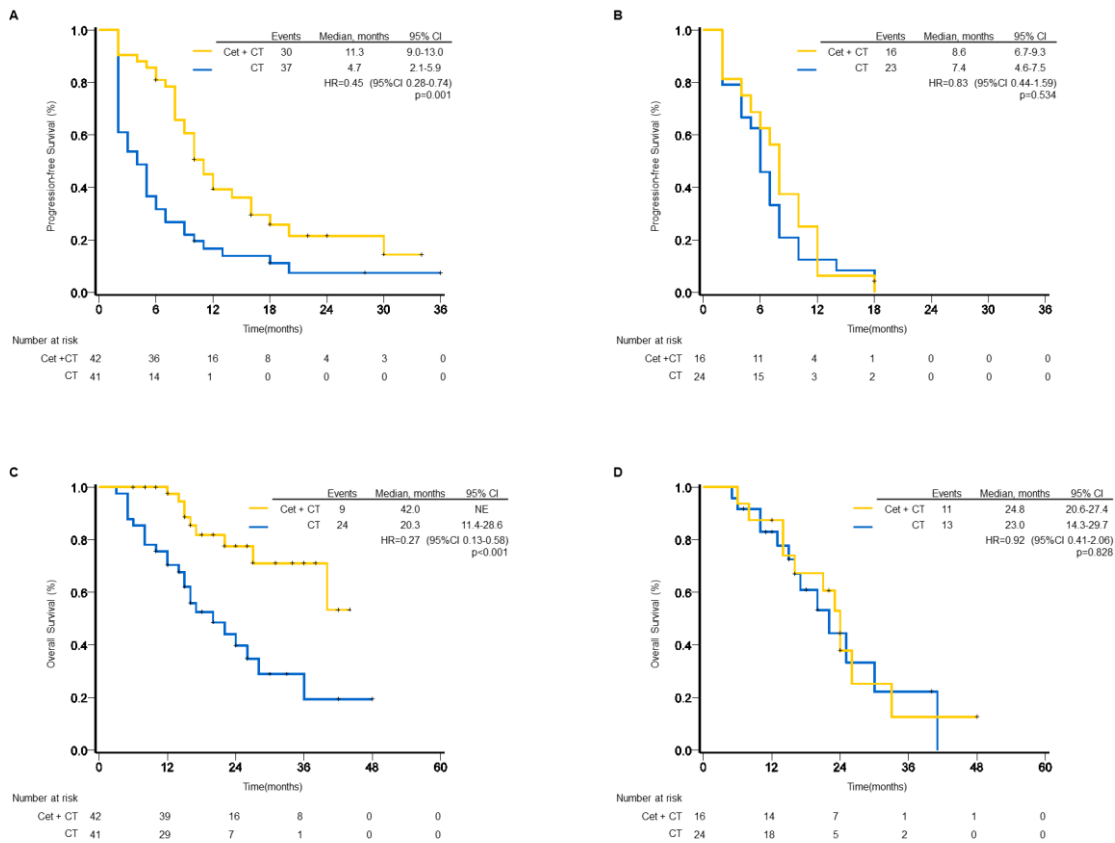

**Figure S3 Kaplan-Meier curves according to model defined groups in validation cohort.**  
 (A) PFS for the responsive group. (B) PFS for the refractory group.(C) OS for the responsive group.(D) OS for the refractory group.

Abbreviations: PFS, progression-free survival; OS, overall survival; cet, cetuximab; CT, chemotherapy; HR, hazard ratio.

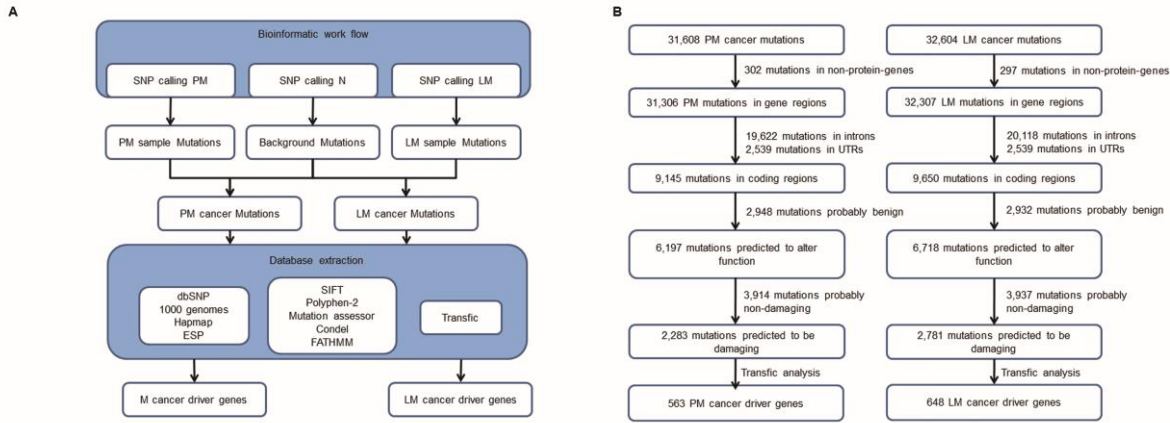

**Figure S4 Workflow (A) and variant analysis (B) of WES data.**

Abbreviations: PM, primary malignancy; LM, liver metastases

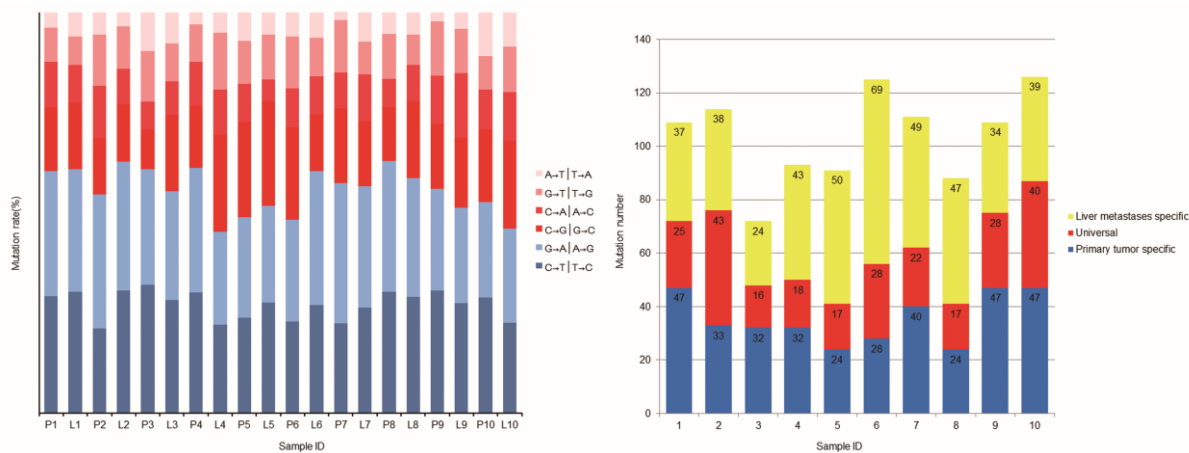

**Figure S5 Summary of driver mutations identified by WES.**

(A) Distribution of transitions and transversions. (B) Distribution of driver mutations in primary tumor and liver metastases.

Abbreviations: P, primary tumor; L, liver metastases.



## SUPPLEMENTARY TABLES

**Table S1. Clinical and pathologic characteristics of patients using for whole exome sequencing**

| Patient ID | Gender | Age, years | Primary tumor    |                 |         |         |                     |                   | Liver metastases |        |                  |          |
|------------|--------|------------|------------------|-----------------|---------|---------|---------------------|-------------------|------------------|--------|------------------|----------|
|            |        |            | Location         | Differentiation | T stage | N stage | Verineural invasion | Vascular invasion | Tumor deposits   | Number | Maximum size, cm | Position |
| 1          | Male   | 48         | Cecum            | Grade III       | 4       | 2a      | No                  | No                | 0                | 1      | 2.5              | unilobar |
| 2          | Male   | 68         | Sigmoid colon    | Grade IV        | 4       | 1c      | No                  | No                | 2                | 1      | 3                | unilobar |
| 3          | Female | 54         | Hepatic flexure  | Grade IV        | 4       | 1b      | No                  | Yes               | 2                | 5      | 2.5              | bilobar  |
| 4          | Male   | 49         | Rectum           | Grade III       | 3       | 2b      | No                  | No                | 5                | 2      | 3                | unilobar |
| 5          | Male   | 69         | Rectum           | Grade III       | 4       | 1a      | No                  | No                | 1                | 1      | 4.5              | unilobar |
| 6          | Female | 68         | Ascending colon  | Grade III       | 3       | 2b      | Yes                 | Yes               | 0                | 4      | 5                | bilobar  |
| 7          | Male   | 63         | Ascending colon  | Grade II        | 3       | 0       | No                  | No                | 0                | 1      | 2                | unilobar |
| 8          | Female | 56         | Rectum           | Grade III       | 4       | 1b      | Yes                 | No                | 8                | 1      | 2                | unilobar |
| 9          | Female | 56         | Transverse colon | Grade III       | 4       | 1b      | No                  | Yes               | 1                | 2      | 1.5              | bilobar  |
| 10         | Female | 61         | Ascending colon  | GradeIV         | 3       | 1b      | No                  | No                | 0                | 1      | 1.5              | unilobar |

**Table S2. Summary of primary assessing of whole exome sequencing data**

| Patient ID | Sample type      | Total number of SNVs | Average depth | > 20x cov. | Tumor-specific SNVs* | Non-silent SNVs ** |          |             |             |      | Damaging SNVs*** | Driver SNVs***<br>* |
|------------|------------------|----------------------|---------------|------------|----------------------|--------------------|----------|-------------|-------------|------|------------------|---------------------|
|            |                  |                      |               |            |                      | Total              | Missense | Frame-shift | Splice-site | Stop |                  |                     |
| 1          | Primary tumor    | 49973                | 76            | 88.60%     | 4405                 | 743                | 546      | 172         | 15          | 10   | 275              | 72                  |
|            | Liver metastases | 45818                | 67            | 84.90%     | 4256                 | 759                | 530      | 211         | 12          | 6    | 250              | 62                  |
|            | Normal mucosa    | 49738                | 71            | 88.20%     | /                    | /                  | /        | /           | /           | /    | /                | /                   |
| 2          | Primary tumor    | 47917                | 94            | 90.20%     | 4086                 | 690                | 502      | 167         | 13          | 8    | 245              | 76                  |
|            | Liver metastases | 44228                | 82            | 86.80%     | 3668                 | 713                | 513      | 179         | 10          | 11   | 262              | 81                  |
|            | Normal mucosa    | 48866                | 89            | 89.80%     | /                    | /                  | /        | /           | /           | /    | /                | /                   |
| 3          | Primary tumor    | 51457                | 124           | 92.90%     | 3762                 | 631                | 444      | 176         | 6           | 5    | 213              | 48                  |
|            | Liver metastases | 47771                | 67            | 83.70%     | 2900                 | 487                | 316      | 159         | 8           | 4    | 173              | 40                  |
|            | Normal mucosa    | 50923                | 121           | 92.00%     | /                    | /                  | /        | /           | /           | /    | /                | /                   |
| 4          | Primary tumor    | 49708                | 103           | 87.90%     | 4111                 | 694                | 499      | 179         | 8           | 8    | 233              | 50                  |
|            | Liver metastases | 45583                | 70            | 91.10%     | 4159                 | 715                | 505      | 181         | 17          | 12   | 250              | 61                  |
|            | Normal mucosa    | 49588                | 105           | 80.70%     | /                    | /                  | /        | /           | /           | /    | /                | /                   |
| 5          | Primary tumor    | 49760                | 131           | 91.10%     | 3039                 | 492                | 363      | 106         | 12          | 11   | 172              | 41                  |
|            | Liver metastases | 44183                | 73            | 80.70%     | 4251                 | 937                | 457      | 447         | 16          | 17   | 261              | 67                  |
|            | Normal mucosa    | 50453                | 133           | 92.50%     | /                    | /                  | /        | /           | /           | /    | /                | /                   |
| 6          | Primary tumor    | 46580                | 87            | 83.00%     | 4899                 | 851                | 628      | 203         | 12          | 8    | 289              | 56                  |
|            | Liver metastases | 44549                | 99            | 84.50%     | 5354                 | 960                | 753      | 176         | 16          | 16   | 369              | 97                  |
|            | Normal mucosa    | 46271                | 107           | 84.00%     | /                    | /                  | /        | /           | /           | /    | /                | /                   |

|    |               |       |    |        |      |      |      |     |    |    |     |    |
|----|---------------|-------|----|--------|------|------|------|-----|----|----|-----|----|
|    | Primary tumor | 44512 | 86 | 80.60% | 4749 | 845  | 590  | 229 | 15 | 11 | 267 | 62 |
|    | Liver         |       |    |        |      |      |      |     |    |    |     |    |
| 7  | metastases    | 41831 | 74 | 79.90% | 5105 | 906  | 675  | 195 | 20 | 16 | 312 | 71 |
|    | Normal mucosa | 46457 | 82 | 82.40% | /    | /    | /    | /   | /  | /  | /   | /  |
|    | Primary tumor | 45208 | 76 | 81.10% | 3796 | 639  | 396  | 217 | 19 | 7  | 195 | 41 |
|    | Liver         |       |    |        |      |      |      |     |    |    |     |    |
| 8  | metastases    | 49155 | 85 | 88.50% | 4316 | 810  | 562  | 225 | 17 | 6  | 282 | 64 |
|    | Normal mucosa | 50877 | 78 | 89.50% | /    | /    | /    | /   | /  | /  | /   | /  |
|    | Primary tumor | 43981 | 71 | 77.80% | 4284 | 820  | 644  | 143 | 15 | 18 | 337 | 75 |
|    | Liver         |       |    |        |      |      |      |     |    |    |     |    |
| 9  | metastases    | 48210 | 87 | 85.30% | 4236 | 740  | 550  | 160 | 14 | 16 | 287 | 62 |
|    | Normal mucosa | 49746 | 81 | 86.50% | /    | /    | /    | /   | /  | /  | /   | /  |
|    | Primary tumor | 44710 | 88 | 84.70% | 6827 | 1237 | 1025 | 176 | 24 | 12 | 486 | 87 |
|    | Liver         |       |    |        |      |      |      |     |    |    |     |    |
| 10 | metastases    | 47004 | 81 | 81.10% | 6458 | 1152 | 902  | 221 | 15 | 14 | 417 | 79 |
|    | Normal mucosa | 45668 | 89 | 82.70% | /    | /    | /    | /   | /  | /  | /   | /  |

\* Variants present in normal samples were considered as germ-line events. Variants present in primary or metastatic tumor samples but not in corresponding normal sample were considered as primary or metastatic tumor-specific events.

\*\* Synonymous variants and variants in intron and untranslated regions (UTR) were excluded. "Missense" included missense and missense-near-splice; "frame-shift" included frame-shift and frame-shift-near-splice; "splice-site" included splice-acceptor and splice-donor; "stop" included stop-lost, stop-lost-near-splice, stop-gained and stop-gained-near-splice.

\*\*\* predicted to possibly affect gene function by tools rank the functional impact of cancer somatic mutations (e.g. SIFT, Polyphen-2, Mutation assessor, Condel, FATHMM)

\*\*\*\* predicted to be cancer driver mutations by transFIC analysis

**Table S5. List of genes analyzed using target capture sequencing**

---

|          |        |         |         |          |        |          |         |         |        |
|----------|--------|---------|---------|----------|--------|----------|---------|---------|--------|
| ABL1     | CDKN2A | ERBB2   | FGFR3   | HRAS     | LY6G6D | MMP2     | PIK3CA  | SERBP1  | TBXAS1 |
| ACTN4    | COL1A1 | ERBB4   | FLT3    | IDH1     | MAGEC1 | MPL      | POMZP3  | SMAD4   | TCF3   |
| AKT1     | COL2A1 | ESRRA   | FN1     | IDH2     | MDC1   | MUC16    | POU5F1B | SMARCB1 | TGFBR2 |
| APC      | CSF1R  | EZH2    | FSIP2   | JAK2     | MDN1   | NCAM1    | PTCH1   | SMCR7   | THBS1  |
| ATAD3B   | CTNNB1 | FAM129A | GNA11   | JAK3     | MEGF6  | NEK9     | PTEN    | SMO     | TNXB   |
| ATP6V1B1 | CUL9   | FBN3    | GNAQ    | KDR      | MET    | NOBOX    | PTPN11  | SRC     | TP53   |
| BRCA1    | CXCR4  | FBXW7   | GNAS    | KIAA0182 | MICB   | NOTCH1   | PTPN23  | SRPK3   | TYK2   |
| CARD10   | DSE    | FCGBP   | HECA    | KIT      | MKI67  | NPM1     | RB1     | STAB1   | VHL    |
| CD34     | DST    | FGFR1   | HNF1A   | LAMA4    | MLH1   | PDCD1LG2 | RBMXL3  | STK11   | YSK4   |
| CDH1     | EGFR   | FGFR2   | HNRNPA0 | LRRN4    | MLL3   | PDGFRA   | RET     | TAPBP   | ZNF462 |

---

**Table S6. Summary of RAS mutations**

|      |     |     |     |       |           |           |
|------|-----|-----|-----|-------|-----------|-----------|
| KRAS | 3   | 59  | 175 | G>A   | A59T      | COSM546   |
|      |     |     | 176 | C>A   | A59E      | COSM547   |
|      |     | 61  | 182 | A>G   | Q61R      | COSM552   |
|      |     |     | 182 | A>T   | Q61L      | COSM553   |
|      |     |     | 183 | A>C   | Q61H      | COSM554   |
|      | 4   | 117 | 183 | A>T   | Q61H      | COSM555   |
|      |     |     | 351 | A>C   | K117N     | COSM19940 |
|      |     | 146 | 351 | A>T   | K117N     | COSM28519 |
|      |     |     | 436 | G>A   | A146T     | COSM19404 |
|      |     |     | 436 | G>C   | A146P     | COSM19905 |
| NRAS | 2   | 12  | 437 | C>T   | A146V     | COSM19900 |
|      |     |     | 34  | G>A   | G12S      | COSM563   |
|      |     |     | 34  | G>T   | G12C      | COSM562   |
|      |     |     | 34  | G>C   | G12R      | COSM561   |
|      |     |     | 35  | G>A   | G12D      | COSM564   |
|      |     |     | 35  | G>T   | G12V      | COSM566   |
|      |     | 13  | 35  | G>C   | G12A      | COSM565   |
|      |     |     | 37  | G>A   | G13S      | COSM571   |
|      |     |     | 37  | G>T   | G13C      | COSM570   |
|      | 3   | 61  | 37  | G>C   | G13R      | COSM569   |
|      |     |     | 38  | G>A   | G13D      | COSM573   |
|      |     |     | 38  | G>T   | G13V      | COSM574   |
|      |     |     | 38  | G>C   | G13A      | COSM575   |
|      |     |     | 59  | G>A   | A59T      | COSM578   |
|      |     |     | 181 | C>A   | Q61K      | COSM580   |
|      | 4   | 146 | 181 | C>G   | Q61E      | COSM581   |
|      |     |     | 182 | A>T   | Q61L      | COSM583   |
|      |     |     | 182 | A>G   | Q61R      | COSM584   |
|      |     |     | 182 | A>C   | Q61P      | COSM582   |
| 183  |     |     | A>T | Q61H  | COSM585   |           |
| 4    | 146 | 183 | A>C | Q61H  | COSM586   |           |
|      |     | 436 | G>A | A146T | COSM27174 |           |

**Table S7. Summary of detected mutations of RAS, BRAF, PI3KCA and genes included in the model**

| Patient ID | Cohort   | KRAS            | NRAS            | BRAF            | ATP6V1B1          |                               | CUL9              |                               | ERBB2             |                               | LY6G6D            |                               | PTCH1             |                               | RBMXL3            |                               |
|------------|----------|-----------------|-----------------|-----------------|-------------------|-------------------------------|-------------------|-------------------------------|-------------------|-------------------------------|-------------------|-------------------------------|-------------------|-------------------------------|-------------------|-------------------------------|
|            |          | Mutational exon | Mutational exon | Mutational exon | Amino acid change | Fraction of mutant alleles, % | Amino acid change | Fraction of mutant alleles, % | Amino acid change | Fraction of mutant alleles, % | Amino acid change | Fraction of mutant alleles, % | Amino acid change | Fraction of mutant alleles, % | Amino acid change | Fraction of mutant alleles, % |
| 2          | training | -               | -               | -               | T30I              | 31.7                          | H1948P            | 40.4                          | I95V              | 44.3                          | -                 | -                             | -                 | -                             | -                 | -                             |
| 3          | training | -               | -               | Exon 15         | -                 | -                             | H1948P            | 37.5                          | -                 | -                             | -                 | -                             | -                 | -                             | -                 | -                             |
| 4          | training | -               | -               | -               | T30I              | 98.9                          | H1948P            | 98.5                          | -                 | -                             | -                 | -                             | -                 | -                             | -                 | -                             |
| 5          | training | -               | -               | -               | -                 | -                             | H1948P            | 42.6                          | -                 | -                             | -                 | -                             | P1314L            | 96.9                          | D398N             | 52.5                          |
| 6          | training | -               | -               | -               | T30I              | 30                            | H1948P            | 27.4                          | I95V              | 51.8                          | -                 | -                             | P1314L            | 95.6                          | D398N             | 61.4                          |
| 7          | training | -               | -               | -               | T30I              | 100                           | H1948P            | 39                            | -                 | -                             | -                 | -                             | -                 | -                             | -                 | -                             |
| 8          | training | -               | -               | -               | -                 | -                             | -                 | -                             | -                 | -                             | -                 | -                             | P1314L            | 52.6                          | D398N             | 57.7                          |
| 9          | training | -               | -               | -               | -                 | -                             | H1948P            | 97.6                          | -                 | -                             | -                 | -                             | -                 | -                             | D398N             | 63.3                          |
| 10         | training | -               | -               | -               | T30I              | 39.1                          | H1948P            | 30                            | -                 | -                             | -                 | -                             | P1314L            | 14.8                          | -                 | -                             |
| 11         | training | -               | -               | -               | T30I              | 53.9                          | H1948P            | 20.7                          | -                 | -                             | -                 | -                             | P1314L            | 68.8                          | D398N             | 62.3                          |
| 12         | training | -               | -               | -               | T30I              | 21.3                          | H1948P            | 26.9                          | I95V              | 21.3                          | R112C             | 20.2                          | P1314L            | 78.8                          | -                 | -                             |
| 13         | training | -               | -               | -               | -                 | -                             | H1948P            | 47.9                          | -                 | -                             | -                 | -                             | P1314L            | 53.9                          | D398N             | 54.1                          |
| 14         | training | -               | -               | -               | T30I              | 69.3                          | -                 | -                             | -                 | -                             | -                 | -                             | -                 | -                             | -                 | -                             |
| 15         | training | -               | -               | -               | -                 | -                             | H1948P            | 66.7                          | -                 | -                             | -                 | -                             | -                 | -                             | -                 | -                             |
| 16         | training | Exon 4          | -               | -               | T30I              | 100                           | H1948P            | 98.8                          | -                 | -                             | -                 | -                             | P1314L            | 98.2                          | -                 | -                             |
| 18         | training | Exon 3          | -               | -               | -                 | -                             | -                 | -                             | -                 | -                             | -                 | -                             | -                 | -                             | D398N             | 61.5                          |
| 19         | training | -               | -               | -               | -                 | -                             | H1948P            | 51.6                          | -                 | -                             | -                 | -                             | -                 | -                             | D398N             | 60.5                          |
| 20         | training | -               | -               | -               | -                 | -                             | H1948P            | 100                           | -                 | -                             | -                 | -                             | P1314L            | 51.6                          | D398N             | 60.3                          |
| 21         | training | -               | -               | Exon 15         | T30I              | 61.3                          | H1948P            | 53.7                          | I95V              | 35                            | -                 | -                             | P1314L            | 71.4                          | -                 | -                             |
| 22         | training | -               | -               | -               | -                 | -                             | -                 | -                             | I95V              | 30                            | -                 | -                             | -                 | -                             | -                 | -                             |
| 23         | training | -               | -               | -               | -                 | -                             | H1948P            | 43.4                          | -                 | -                             | -                 | -                             | P1314L            | 47.5                          | D398N             | 88.9                          |
| 24         | training | -               | -               | Exon 15         | -                 | -                             | H1948P            | 100                           | -                 | -                             | -                 | -                             | P1314L            | 54.7                          | D398N             | 52                            |
| 25         | training | -               | -               | -               | T30I              | 50.6                          | H1948P            | 7.6                           | -                 | -                             | R112C             | 39.1                          | P1314L            | 40.8                          | D398N             | 58.5                          |

|    |          |        |   |         |      |      |        |      |      |      |       |      |        |      |       |      |
|----|----------|--------|---|---------|------|------|--------|------|------|------|-------|------|--------|------|-------|------|
| 26 | training | -      | - | -       | T30I | 15.4 | H1948P | 47.8 | -    | -    | -     | -    | P1314L | 93.1 | D398N | 55.6 |
| 27 | training | -      | - | -       | -    | -    | H1948P | 52.5 | I95V | 46.6 | -     | -    | P1314L | 97.2 | D398N | 58.9 |
| 28 | training | -      | - | -       | -    | -    | H1948P | 100  | -    | -    | -     | -    | P1314L | 46.7 | D398N | 57.6 |
| 29 | training | -      | - | -       | -    | -    | H1948P | 84.2 | -    | -    | R112C | 41.8 | P1314L | 91.2 | -     | -    |
| 30 | training | -      | - | -       | -    | -    | H1948P | 44.5 | -    | -    | -     | -    | -      | -    | D398N | 51.6 |
| 31 | training | -      | - | -       | T30I | 45.1 | -      | -    | -    | -    | R112C | 100  | -      | -    | D398N | 47.8 |
| 32 | training | -      | - | -       | -    | -    | H1948P | 100  | -    | -    | -     | -    | -      | -    | -     | -    |
| 33 | training | -      | - | -       | T30I | 68.5 | H1948P | 50   | -    | -    | -     | -    | P1314L | 56.2 | D398N | 55.6 |
| 34 | training | -      | - | -       | T30I | 62.1 | H1948P | 53.8 | -    | -    | -     | -    | P1314L | 31   | D398N | 54.1 |
| 35 | training | -      | - | -       | T30I | 53.8 | -      | -    | I95V | 46.4 | -     | -    | P1314L | 40.3 | -     | -    |
| 36 | training | -      | - | -       | -    | -    | -      | -    | -    | -    | -     | -    | -      | -    | -     | -    |
| 37 | training | -      | - | -       | -    | -    | -      | -    | I95V | 45   | -     | -    | -      | -    | D398N | 58.3 |
| 38 | training | -      | - | -       | -    | -    | -      | -    | -    | -    | -     | -    | P1314L | 66.7 | D398N | 76.5 |
| 39 | training | -      | - | -       | -    | -    | -      | -    | -    | -    | -     | -    | -      | -    | -     | -    |
| 40 | training | -      | - | -       | -    | -    | -      | -    | -    | -    | -     | -    | P1314L | 81.9 | D398N | 9.1  |
| 41 | training | -      | - | Exon 15 | T30I | 53   | -      | -    | -    | -    | R112C | 52   | P1314L | 95.2 | -     | -    |
| 42 | training | -      | - | Exon 15 | T30I | 13   | H1948P | 41.7 | -    | -    | -     | -    | P1314L | 94.1 | D398N | 41.2 |
| 43 | training | -      | - | Exon 15 | -    | -    | -      | -    | -    | -    | -     | -    | -      | -    | -     | -    |
| 44 | training | Exon 4 | - | -       | -    | -    | H1948P | 41.3 | I95V | 69.9 | -     | -    | -      | -    | -     | -    |
| 45 | training | -      | - | -       | T30I | 64.6 | H1948P | 35.2 | -    | -    | R112C | 66.1 | P1314L | 79.2 | -     | -    |
| 46 | training | -      | - | -       | T30I | 73.5 | H1948P | 44.8 | I95V | 94.5 | -     | -    | P1314L | 95.3 | D398N | 66.8 |
| 47 | training | -      | - | -       | -    | -    | H1948P | 100  | -    | -    | -     | -    | P1314L | 97.2 | D398N | 55.3 |
| 48 | training | -      | - | -       | -    | -    | -      | -    | -    | -    | R112C | 41.1 | -      | -    | D398N | 50.6 |
| 49 | training | -      | - | -       | T30I | 47.7 | -      | -    | -    | -    | R112C | 45.8 | P1314L | 54.9 | -     | -    |
| 50 | training | -      | - | -       | -    | -    | H1948P | 50.4 | I95V | 44.3 | R112C | 41.7 | P1314L | 66.7 | D398N | 53.8 |
| 51 | training | -      | - | Exon 15 | T30I | 6.3  | -      | -    | -    | -    | -     | -    | P1314L | 54   | D398N | 64.2 |
| 52 | training | -      | - | -       | T30I | 59.5 | H1948P | 45.3 | -    | -    | -     | -    | P1314L | 44   | D398N | 60.3 |
| 53 | training | Exon 4 | - | -       | T30I | 10   | -      | -    | I95V | 40.5 | -     | -    | P1314L | 90.9 | -     | -    |
| 54 | training | -      | - | -       | -    | -    | H1948P | 54.8 | -    | -    | -     | -    | P1314L | 96.1 | -     | -    |
| 55 | training | -      | - | -       | -    | -    | H1948P | 43.1 | -    | -    | -     | -    | -      | -    | D398N | 60.8 |

|    |          |        |        |         |      |      |        |      |      |      |       |      |        |      |       |      |
|----|----------|--------|--------|---------|------|------|--------|------|------|------|-------|------|--------|------|-------|------|
| 56 | training | -      | -      | -       | T30I | 52.5 | H1948P | 70.6 | I95V | 43.7 | -     | -    | -      | -    | -     | -    |
| 57 | training | -      | -      | -       | -    | -    | H1948P | 100  | -    | -    | -     | -    | P1314L | 45.5 | D398N | 52.7 |
| 58 | training | -      | -      | -       | -    | -    | H1948P | 47.6 | -    | -    | -     | -    | P1314L | 37.3 | -     | -    |
| 59 | training | -      | -      | -       | -    | -    | H1948P | 44.7 | -    | -    | -     | -    | P1314L | 56.6 | D398N | 57.8 |
| 60 | training | -      | -      | -       | -    | -    | -      | -    | -    | -    | -     | -    | P1314L | 97.6 | -     | -    |
| 61 | training | -      | -      | -       | T30I | 100  | H1948P | 100  | -    | -    | -     | -    | P1314L | 96.4 | D398N | 61.8 |
| 62 | training | -      | -      | -       | -    | -    | -      | -    | -    | -    | -     | -    | P1314L | 67.7 | -     | -    |
| 63 | training | -      | -      | -       | T30I | 62.7 | H1948P | 55.5 | -    | -    | R112C | 50   | P1314L | 97.5 | -     | -    |
| 64 | training | -      | -      | Exon 15 | -    | -    | H1948P | 98.3 | I95V | 35.3 | -     | -    | -      | -    | D398N | 58.8 |
| 65 | training | -      | Exon 2 | -       | T30I | 67   | H1948P | 59.8 | -    | -    | R112C | 32.8 | -      | -    | D398N | 50.3 |
| 66 | training | Exon 3 | -      | -       | -    | -    | H1948P | 48.7 | -    | -    | R112C | 52.1 | P1314L | 97.6 | -     | -    |
| 67 | training | -      | Exon 3 | -       | -    | -    | -      | -    | -    | -    | R112C | 55.5 | P1314L | 93   | -     | -    |
| 68 | training | -      | -      | -       | -    | -    | H1948P | 87.9 | -    | -    | -     | -    | P1314L | 69   | -     | -    |
| 69 | training | -      | -      | Exon 15 | -    | -    | -      | -    | -    | -    | -     | -    | -      | -    | -     | -    |
| 70 | training | -      | -      | -       | T30I | 13.1 | -      | -    | -    | -    | -     | -    | P1314L | 12.8 | -     | -    |
| 71 | training | -      | Exon 4 | -       | -    | -    | H1948P | 36.4 | -    | -    | -     | -    | -      | -    | -     | -    |
| 72 | training | Exon 3 | -      | -       | -    | -    | H1948P | 88.9 | -    | -    | -     | -    | P1314L | 100  | -     | -    |
| 73 | training | -      | -      | -       | -    | -    | H1948P | 42.9 | -    | -    | -     | -    | P1314L | 97   | D398N | 55.3 |
| 74 | training | -      | Exon 3 | -       | -    | -    | H1948P | 100  | -    | -    | -     | -    | P1314L | 100  | D398N | 37.5 |
| 75 | training | -      | -      | -       | T30I | 66.9 | H1948P | 94   | I95V | 47.6 | -     | -    | P1314L | 97.2 | -     | -    |
| 76 | training | -      | -      | -       | -    | -    | -      | -    | -    | -    | -     | -    | -      | -    | -     | -    |
| 77 | training | -      | -      | -       | -    | -    | -      | -    | I95V | 48.1 | R112C | 31.3 | -      | -    | D398N | 52.1 |
| 78 | training | -      | -      | Exon 15 | -    | -    | -      | -    | -    | -    | -     | -    | -      | -    | -     | -    |
| 79 | training | -      | -      | -       | -    | -    | H1948P | 44.1 | I95V | 69.7 | -     | -    | P1314L | 87.2 | -     | -    |
| 80 | training | -      | -      | -       | -    | -    | H1948P | 52   | -    | -    | R112C | 46.9 | P1314L | 33.3 | -     | -    |
| 81 | training | -      | -      | -       | -    | -    | -      | -    | I95V | 85   | -     | -    | P1314L | 97.5 | -     | -    |
| 82 | training | -      | -      | -       | T30I | 51   | H1948P | 56.6 | -    | -    | R112C | 55   | P1314L | 94.1 | D398N | 62.9 |
| 83 | training | -      | -      | -       | T30I | 15.8 | -      | -    | -    | -    | R112C | 30.1 | P1314L | 92.6 | D398N | 57.4 |
| 84 | training | -      | -      | Exon 15 | -    | -    | H1948P | 8.2  | -    | -    | -     | -    | -      | -    | -     | -    |
| 85 | training | -      | -      | Exon 15 | -    | -    | H1948P | 72   | -    | -    | -     | -    | P1314L | 53.1 | -     | -    |



|     |             |        |        |         |      |      |        |      |      |      |       |      |        |      |       |      |
|-----|-------------|--------|--------|---------|------|------|--------|------|------|------|-------|------|--------|------|-------|------|
| 86  | training    | -      | -      | -       | -    | -    | -      | -    | -    | -    | -     | -    | -      | -    | -     | -    |
| 87  | training    | -      | Exon 3 | -       | -    | -    | H1948P | 100  | I95V | 48.3 | R112C | 87.9 | -      | -    | D398N | 56.7 |
| 88  | training    | -      | -      | -       | -    | -    | H1948P | 100  | -    | -    | -     | -    | P1314L | 52.8 | -     | -    |
| 89  | training    | -      | Exon 2 | -       | T30I | 69.9 | H1948P | 49.2 | -    | -    | -     | -    | P1314L | 97.5 | D398N | 60.4 |
| 90  | training    | -      | -      | Exon 15 | T30I | 47.9 | H1948P | 100  | I95V | 32.8 | -     | -    | -      | -    | D398N | 60.8 |
| 91  | training    | -      | -      | -       | -    | -    | H1948P | 60.3 | -    | -    | -     | -    | P1314L | 49.7 | D398N | 55.7 |
| 92  | training    | -      | -      | -       | -    | -    | H1948P | 41.3 | -    | -    | -     | -    | P1314L | 27.4 | -     | -    |
| 93  | training    | -      | -      | -       | T30I | 48.8 | H1948P | 48.3 | -    | -    | -     | -    | P1314L | 97.3 | D398N | 62.5 |
| 94  | training    | -      | -      | -       | -    | -    | H1948P | 34.1 | -    | -    | R112C | 44   | P1314L | 68.4 | D398N | 60.9 |
| 95  | training    | -      | -      | -       | -    | -    | -      | -    | -    | -    | -     | -    | -      | -    | -     | -    |
| 97  | training    | -      | -      | -       | T30I | 6.2  | H1948P | 58.2 | I95V | 54.7 | R112C | 43.1 | P1314L | 67   | D398N | 55.7 |
| 98  | training    | -      | -      | -       | -    | -    | H1948P | 50   | -    | -    | -     | -    | -      | -    | -     | -    |
| 99  | training    | -      | -      | -       | -    | -    | -      | -    | -    | -    | R112C | 42.5 | -      | -    | D398N | 43.3 |
| 100 | training    | -      | -      | -       | T30I | 50.2 | -      | -    | I95V | 41.3 | -     | -    | P1314L | 98.2 | D398N | 56.2 |
| 101 | training    | -      | -      | -       | T30I | 52.6 | H1948P | 45   | -    | -    | R112C | 95.1 | P1314L | 37.3 | -     | -    |
| 102 | training    | -      | -      | -       | -    | -    | H1948P | 100  | -    | -    | -     | -    | -      | -    | D398N | 70.9 |
| 103 | training    | -      | -      | -       | T30I | 50.6 | H1948P | 40.9 | I95V | 41.5 | -     | -    | P1314L | 97.8 | -     | -    |
| 104 | training    | Exon 3 | -      | -       | T30I | 36.7 | H1948P | 40.5 | -    | -    | -     | -    | P1314L | 97.8 | D398N | 60.9 |
| 105 | training    | -      | -      | Exon 15 | T30I | 53.5 | H1948P | 5.4  | -    | -    | -     | -    | P1314L | 51.2 | D398N | 59   |
| 106 | training    | -      | -      | -       | T30I | 8.3  | -      | -    | -    | -    | R112C | 33   | -      | -    | D398N | 59.6 |
| 107 | training    | -      | -      | -       | -    | -    | -      | -    | -    | -    | -     | -    | -      | -    | D398N | 61.2 |
| 108 | training    | -      | -      | -       | T30I | 54.4 | -      | -    | I95V | 40.8 | -     | -    | -      | -    | D398N | 55   |
| 109 | training    | -      | -      | -       | -    | -    | H1948P | 68.7 | -    | -    | -     | -    | P1314L | 78.6 | D398N | 33.3 |
| 401 | vailidation | -      | -      | -       | T30I | 68.2 | H1948P | 25.1 | -    | -    | R112C | 24.3 | P1314L | 96.2 | D398N | 86.9 |
| 402 | vailidation | -      | -      | Exon 15 | T30I | 43.1 | H1948P | 45.6 | -    | -    | -     | -    | P1314L | 64.8 | D398N | 90   |
| 403 | vailidation | -      | -      | -       | -    | -    | H1948P | 56.7 | -    | -    | -     | -    | P1314L | 41.3 | -     | -    |
| 404 | vailidation | -      | -      | -       | T30I | 38.8 | H1948P | 92.1 | -    | -    | -     | -    | P1314L | 33.3 | D398N | 68.9 |
| 405 | vailidation | -      | -      | -       | -    | -    | H1948P | 39.1 | -    | -    | R112C | 53.2 | P1314L | 49.8 | D398N | 89.5 |
| 407 | vailidation | -      | -      | -       | -    | -    | H1948P | 27.8 | -    | -    | R112C | 93.8 | P1314L | 61.9 | D398N | 79.6 |
| 408 | vailidation | -      | -      | -       | T30I | 47.9 | H1948P | 59.2 | -    | -    | -     | -    | P1314L | 100  | D398N | 91.8 |

|     |             |        |        |         |      |      |        |      |      |      |       |      |        |      |       |      |
|-----|-------------|--------|--------|---------|------|------|--------|------|------|------|-------|------|--------|------|-------|------|
| 410 | vailidation | -      | -      | -       | -    | -    | H1948P | 53.6 | -    | -    | -     | -    | P1314L | 59.7 | D398N | 90.7 |
| 411 | vailidation | -      | -      | -       | -    | -    | H1948P | 56.1 | -    | -    | R112C | 49.1 | P1314L | 61.7 | D398N | 91.8 |
| 412 | vailidation | -      | -      | -       | T30I | 62.1 | H1948P | 100  | -    | -    | -     | -    | P1314L | 96.8 | D398N | 81.2 |
| 413 | vailidation | -      | -      | -       | -    | -    | -      | -    | I95V | 67.6 | -     | -    | -      | -    | D398N | 89.7 |
| 414 | vailidation | -      | -      | Exon 15 | T30I | 34.3 | H1948P | 100  | -    | -    | -     | -    | P1314L | 45.9 | D398N | 77   |
| 415 | vailidation | -      | -      | -       | T30I | 41.4 | H1948P | 63.6 | -    | -    | -     | -    | P1314L | 97.1 | -     | -    |
| 416 | vailidation | Exon 3 | -      | -       | -    | -    | -      | -    | -    | -    | R112C | 48.9 | P1314L | 58.4 | D398N | 91.4 |
| 417 | vailidation | Exon 3 | -      | -       | -    | -    | -      | -    | -    | -    | -     | -    | -      | -    | -     | -    |
| 418 | vailidation | -      | -      | -       | T30I | 62   | H1948P | 46.3 | -    | -    | -     | -    | -      | -    | D398N | 93.1 |
| 419 | vailidation | -      | -      | -       | T30I | 63.6 | -      | -    | I95V | 34.4 | -     | -    | P1314L | 66.1 | D398N | 65.2 |
| 420 | vailidation | -      | -      | -       | -    | -    | H1948P | 58.8 | I95V | 98.2 | -     | -    | P1314L | 100  | D398N | 81.7 |
| 421 | vailidation | -      | -      | -       | T30I | 50.3 | -      | -    | -    | -    | R112C | 41.4 | P1314L | 99.5 | D398N | 72.3 |
| 422 | vailidation | -      | -      | -       | T30I | 42.4 | H1948P | 52.3 | -    | -    | -     | -    | P1314L | 100  | D398N | 89.7 |
| 423 | vailidation | Exon 4 | -      | -       | T30I | 50   | H1948P | 41.5 | -    | -    | -     | -    | -      | -    | D398N | 74.5 |
| 424 | vailidation | -      | -      | -       | -    | -    | H1948P | 98.2 | -    | -    | -     | -    | P1314L | 100  | D398N | 91.8 |
| 425 | vailidation | -      | -      | -       | T30I | 61.3 | -      | -    | -    | -    | -     | -    | -      | -    | D398N | 89.8 |
| 426 | vailidation | -      | -      | -       | -    | -    | H1948P | 60.5 | -    | -    | -     | -    | P1314L | 36.7 | D398N | 100  |
| 427 | vailidation | -      | -      | -       | -    | -    | H1948P | 98.7 | -    | -    | R112C | 53.3 | P1314L | 96.7 | D398N | 89.1 |
| 428 | vailidation | -      | -      | -       | -    | -    | -      | -    | I95V | 15.3 | -     | -    | P1314L | 91.5 | D398N | 80.9 |
| 429 | vailidation | -      | -      | -       | T30I | 52.1 | H1948P | 43.3 | I95V | 48.7 | R112C | 7.8  | P1314L | 98.1 | D398N | 92.9 |
| 430 | vailidation | -      | -      | Exon 15 | -    | -    | -      | -    | -    | -    | -     | -    | -      | -    | -     | -    |
| 431 | vailidation | -      | -      | -       | -    | -    | H1948P | 100  | I95V | 71.8 | R112C | 20.9 | P1314L | 65   | D398N | 95.8 |
| 432 | vailidation | Exon 4 | -      | -       | -    | -    | H1948P | 55.4 | I95V | 53.5 | -     | -    | P1314L | 98.3 | D398N | 86   |
| 433 | vailidation | Exon 4 | -      | -       | -    | -    | H1948P | 47.5 | -    | -    | R112C | 50.1 | P1314L | 58.5 | D398N | 87.1 |
| 434 | vailidation | -      | -      | -       | -    | -    | H1948P | 39.8 | -    | -    | -     | -    | P1314L | 38.6 | D398N | 8.9  |
| 435 | vailidation | -      | -      | -       | -    | -    | -      | -    | I95V | 18.5 | R112C | 38   | P1314L | 98.2 | D398N | 12.7 |
| 436 | vailidation | -      | -      | -       | T30I | 44   | H1948P | 38   | -    | -    | -     | -    | P1314L | 58.7 | D398N | 87.8 |
| 437 | vailidation | -      | -      | -       | -    | -    | -      | -    | -    | -    | R112C | 32.4 | P1314L | 52.1 | D398N | 93.9 |
| 438 | vailidation | -      | -      | -       | -    | -    | -      | -    | I95V | 95.1 | R112C | 53.2 | P1314L | 61.8 | D398N | 78.3 |
| 439 | vailidation | -      | Exon 3 | -       | T30I | 100  | H1948P | 13.5 | -    | -    | -     | -    | P1314L | 47.5 | D398N | 95.6 |

|     |             |        |        |         |      |      |        |      |      |      |       |      |        |      |       |      |
|-----|-------------|--------|--------|---------|------|------|--------|------|------|------|-------|------|--------|------|-------|------|
| 440 | vailidation | -      | -      | -       | T30I | 45.2 | H1948P | 59.8 | -    | -    | -     | -    | -      | -    | D398N | 87   |
| 441 | vailidation | -      | -      | -       | -    | -    | H1948P | 35.2 | I95V | 44.6 | -     | -    | P1314L | 51.5 | D398N | 86.4 |
| 442 | vailidation | -      | -      | -       | T30I | 58.4 | H1948P | 46   | -    | -    | R112C | 46.5 | P1314L | 41.5 | D398N | 93.9 |
| 443 | vailidation | -      | -      | -       | -    | -    | -      | -    | -    | -    | -     | -    | -      | -    | D398N | 92.6 |
| 444 | vailidation | -      | -      | -       | T30I | 49.6 | H1948P | 98.7 | -    | -    | R112C | 35.4 | -      | -    | D398N | 100  |
| 445 | vailidation | -      | -      | -       | -    | -    | H1948P | 16.2 | -    | -    | -     | -    | P1314L | 70.3 | D398N | 100  |
| 446 | vailidation | -      | -      | -       | -    | -    | -      | -    | I95V | 53.8 | -     | -    | P1314L | 42.5 | D398N | 18.2 |
| 447 | vailidation | -      | -      | -       | -    | -    | -      | -    | I95V | 62.8 | -     | -    | P1314L | 95   | D398N | 89.2 |
| 448 | vailidation | -      | -      | -       | -    | -    | H1948P | 57.5 | -    | -    | -     | -    | P1314L | 49.1 | D398N | 84.3 |
| 449 | vailidation | -      | -      | -       | -    | -    | H1948P | 100  | -    | -    | -     | -    | P1314L | 41.6 | D398N | 89.1 |
| 450 | vailidation | Exon 4 | -      | -       | -    | -    | H1948P | 94.3 | -    | -    | R112C | 7.1  | -      | -    | -     | -    |
| 451 | vailidation | -      | -      | -       | T30I | 36.7 | H1948P | 46   | I95V | 5.3  | -     | -    | P1314L | 91.8 | D398N | 83.1 |
| 453 | vailidation | -      | -      | -       | T30I | 46.9 | H1948P | 31.8 | I95V | 20.2 | -     | -    | P1314L | 14.2 | D398N | 84.9 |
| 454 | vailidation | -      | -      | -       | -    | -    | H1948P | 47.3 | -    | -    | -     | -    | -      | -    | D398N | 88.5 |
| 455 | vailidation | -      | -      | -       | -    | -    | H1948P | 40.8 | I95V | 100  | -     | -    | P1314L | 100  | D398N | 95.7 |
| 456 | vailidation | -      | -      | -       | -    | -    | H1948P | 95.9 | -    | -    | -     | -    | P1314L | 68.4 | D398N | 69.4 |
| 457 | vailidation | -      | -      | -       | T30I | 52.4 | H1948P | 46.2 | -    | -    | -     | -    | P1314L | 39.5 | D398N | 85.5 |
| 458 | vailidation | -      | -      | -       | -    | -    | -      | -    | -    | -    | -     | -    | -      | -    | D398N | 82.1 |
| 459 | vailidation | -      | -      | -       | -    | -    | H1948P | 95.7 | -    | -    | -     | -    | P1314L | 55.5 | D398N | 80.4 |
| 460 | vailidation | -      | -      | Exon 15 | -    | -    | -      | -    | -    | -    | -     | -    | P1314L | 94.9 | D398N | 76.1 |
| 461 | vailidation | -      | -      | -       | -    | -    | H1948P | 55.8 | I95V | 51.2 | -     | -    | -      | -    | D398N | 91.7 |
| 462 | vailidation | -      | -      | -       | T30I | 50.8 | H1948P | 98.1 | -    | -    | -     | -    | P1314L | 59.4 | D398N | 89.8 |
| 463 | vailidation | -      | -      | -       | T30I | 61   | -      | -    | -    | -    | -     | -    | P1314L | 95.2 | D398N | 81.8 |
| 464 | vailidation | -      | -      | -       | -    | -    | -      | -    | I95V | 28   | -     | -    | -      | -    | -     | -    |
| 465 | vailidation | -      | -      | -       | -    | -    | -      | -    | -    | -    | -     | -    | -      | -    | -     | -    |
| 466 | vailidation | Exon 3 | -      | -       | -    | -    | H1948P | 52.9 | I95V | 11.9 | -     | -    | -      | -    | D398N | 87.5 |
| 467 | vailidation | -      | Exon 3 | -       | -    | -    | H1948P | 100  | -    | -    | R112C | 37.9 | P1314L | 47.6 | D398N | 100  |
| 468 | vailidation | Exon 4 | -      | -       | -    | -    | -      | -    | -    | -    | -     | -    | -      | -    | -     | -    |
| 469 | vailidation | -      | -      | -       | -    | -    | H1948P | 4.5  | -    | -    | -     | -    | P1314L | 37.2 | D398N | 92.9 |
| 470 | vailidation | -      | -      | -       | -    | -    | -      | -    | -    | -    | -     | -    | -      | -    | -     | -    |

|     |             |        |        |         |      |      |        |      |      |      |       |      |        |      |       |      |
|-----|-------------|--------|--------|---------|------|------|--------|------|------|------|-------|------|--------|------|-------|------|
| 471 | vailidation | -      | Exon 3 | -       | -    | -    | H1948P | 98.9 | -    | -    | -     | -    | P1314L | 29.1 | D398N | 98.4 |
| 472 | vailidation | -      | -      | -       | -    | -    | H1948P | 98   | -    | -    | -     | -    | -      | -    | D398N | 94.6 |
| 473 | vailidation | -      | -      | -       | T30I | 64.9 | H1948P | 44.9 | I95V | 51.3 | -     | -    | P1314L | 97.6 | D398N | 96.7 |
| 474 | vailidation | -      | -      | -       | T30I | 50   | H1948P | 47.6 | -    | -    | -     | -    | -      | -    | D398N | 83.8 |
| 475 | vailidation | Exon 3 | -      | -       | -    | -    | H1948P | 64.1 | I95V | 13.1 | -     | -    | P1314L | 82.5 | D398N | 88.5 |
| 476 | vailidation | -      | -      | Exon 15 | T30I | 51.5 | H1948P | 46.9 | -    | -    | -     | -    | P1314L | 100  | D398N | 88.9 |
| 477 | vailidation | -      | Exon 2 | -       | T30I | 100  | -      | -    | -    | -    | -     | -    | P1314L | 95.2 | D398N | 91.9 |
| 478 | vailidation | -      | -      | -       | -    | -    | H1948P | 51.7 | -    | -    | -     | -    | -      | -    | D398N | 95.3 |
| 479 | vailidation | -      | Exon 3 | -       | -    | -    | H1948P | 100  | -    | -    | -     | -    | P1314L | 97   | D398N | 92.5 |
| 480 | vailidation | -      | -      | -       | T30I | 12.1 | H1948P | 4.1  | -    | -    | R112C | 7.4  | P1314L | 33.3 | D398N | 98.9 |
| 481 | vailidation | -      | -      | -       | T30I | 23.4 | H1948P | 51.6 | -    | -    | -     | -    | P1314L | 46   | D398N | 97.5 |
| 482 | vailidation | -      | -      | -       | T30I | 13   | H1948P | 12   | -    | -    | -     | -    | P1314L | 83   | D398N | 84.1 |
| 483 | vailidation | -      | -      | -       | T30I | 30.8 | H1948P | 6.8  | -    | -    | R112C | 55.5 | P1314L | 7.3  | D398N | 89   |
| 484 | vailidation | -      | -      | -       | T30I | 57.7 | H1948P | 53   | -    | -    | -     | -    | P1314L | 70.5 | D398N | 93.5 |
| 485 | vailidation | -      | -      | -       | T30I | 45.1 | H1948P | 60   | -    | -    | -     | -    | P1314L | 30.5 | D398N | 58.6 |
| 486 | vailidation | -      | -      | Exon 15 | T30I | 42   | H1948P | 8.9  | -    | -    | -     | -    | P1314L | 70.6 | -     | -    |
| 487 | vailidation | -      | -      | -       | -    | -    | -      | -    | I95V | 57.1 | -     | -    | -      | -    | -     | -    |
| 488 | vailidation | -      | -      | -       | -    | -    | H1948P | 50.6 | I95V | 46.6 | -     | -    | -      | -    | D398N | 100  |
| 489 | vailidation | -      | -      | -       | T30I | 89.5 | H1948P | 55.3 | I95V | 50.2 | -     | -    | P1314L | 95.8 | D398N | 96.5 |
| 490 | vailidation | -      | -      | -       | -    | -    | H1948P | 45.5 | -    | -    | -     | -    | -      | -    | -     | -    |
| 491 | vailidation | -      | -      | -       | -    | -    | -      | -    | -    | -    | -     | -    | -      | -    | -     | -    |
| 492 | vailidation | -      | -      | -       | -    | -    | H1948P | 58   | -    | -    | -     | -    | P1314L | 13   | -     | -    |
| 493 | vailidation | -      | -      | -       | T30I | 92.6 | H1948P | 50.2 | -    | -    | -     | -    | P1314L | 95.6 | D398N | 92.1 |
| 494 | vailidation | -      | -      | -       | T30I | 63.3 | H1948P | 99.2 | -    | -    | -     | -    | P1314L | 97.6 | D398N | 93.2 |
| 495 | vailidation | -      | -      | -       | -    | -    | H1948P | 38.5 | -    | -    | -     | -    | P1314L | 48.9 | D398N | 95   |
| 496 | vailidation | -      | -      | -       | -    | -    | H1948P | 100  | -    | -    | -     | -    | P1314L | 97.1 | D398N | 93.1 |
| 497 | vailidation | -      | -      | -       | T30I | 57.6 | H1948P | 48.6 | -    | -    | -     | -    | P1314L | 93.5 | D398N | 90.9 |
| 498 | vailidation | Exon 3 | -      | -       | -    | -    | H1948P | 50.5 | I95V | 28.5 | -     | -    | -      | -    | D398N | 87.9 |
| 499 | vailidation | -      | -      | -       | -    | -    | H1948P | 41.7 | -    | -    | -     | -    | P1314L | 50.4 | D398N | 95.8 |
| 500 | vailidation | -      | -      | -       | -    | -    | -      | -    | I95V | 22.7 | -     | -    | -      | -    | D398N | 95.5 |

|     |             |        |   |         |      |      |        |      |      |      |       |      |        |      |       |      |
|-----|-------------|--------|---|---------|------|------|--------|------|------|------|-------|------|--------|------|-------|------|
| 501 | vailidation | -      | - | -       | -    | -    | H1948P | 91.2 | I95V | 93.2 | -     | -    | P1314L | 51   | D398N | 91.3 |
| 502 | vailidation | -      | - | -       | -    | -    | -      | -    | -    | -    | -     | -    | -      | -    | -     | -    |
| 503 | vailidation | -      | - | -       | -    | -    | -      | -    | -    | -    | -     | -    | -      | -    | -     | -    |
| 504 | vailidation | -      | - | -       | -    | -    | -      | -    | -    | -    | -     | -    | -      | -    | -     | -    |
| 505 | vailidation | -      | - | Exon 15 | -    | -    | -      | -    | I95V | 52   | R112C | 43.6 | P1314L | 95.1 | D398N | 94.9 |
| 506 | vailidation | -      | - | -       | -    | -    | H1948P | 58.3 | -    | -    | -     | -    | P1314L | 34.1 | D398N | 99.2 |
| 507 | vailidation | -      | - | -       | -    | -    | -      | -    | I95V | 46.3 | -     | -    | -      | -    | -     | -    |
| 508 | vailidation | Exon 3 | - | -       | -    | -    | H1948P | 57.7 | -    | -    | -     | -    | P1314L | 97.5 | D398N | 97.5 |
| 509 | vailidation | -      | - | -       | -    | -    | H1948P | 98.6 | I95V | 100  | -     | -    | P1314L | 97.2 | D398N | 96.5 |
| 510 | vailidation | -      | - | -       | T30I | 38   | H1948P | 47.5 | -    | -    | R112C | 47.4 | P1314L | 58.1 | D398N | 95.1 |
| 511 | vailidation | -      | - | -       | T30I | 69.2 | -      | -    | -    | -    | -     | -    | P1314L | 40.9 | D398N | 100  |
| 512 | vailidation | -      | - | -       | T30I | 90.3 | H1948P | 46.6 | I95V | 59.6 | -     | -    | P1314L | 97.6 | D398N | 90.3 |
| 513 | vailidation | -      | - | -       | -    | -    | H1948P | 46.7 | -    | -    | -     | -    | P1314L | 47.3 | D398N | 98   |
| 514 | vailidation | -      | - | -       | T30I | 78.5 | H1948P | 38   | -    | -    | -     | -    | P1314L | 62.3 | D398N | 89.8 |
| 515 | vailidation | -      | - | -       | T30I | 47.9 | -      | -    | -    | -    | -     | -    | -      | -    | D398N | 86.8 |
| 516 | vailidation | -      | - | -       | -    | -    | H1948P | 53.5 | -    | -    | -     | -    | P1314L | 98.4 | D398N | 91.3 |
| 517 | vailidation | -      | - | -       | T30I | 8.7  | H1948P | 43.8 | -    | -    | -     | -    | P1314L | 54.9 | D398N | 93.6 |
| 518 | vailidation | Exon 3 | - | -       | T30I | 21.4 | H1948P | 7.9  | -    | -    | R112C | 9.3  | P1314L | 54.6 | D398N | 93.5 |
| 519 | vailidation | -      | - | -       | -    | -    | H1948P | 25.1 | -    | -    | -     | -    | -      | -    | D398N | 96   |
| 520 | vailidation | -      | - | -       | T30I | 71.3 | H1948P | 100  | -    | -    | -     | -    | P1314L | 55.9 | D398N | 90.3 |
| 521 | vailidation | -      | - | -       | -    | -    | H1948P | 42.4 | I95V | 100  | -     | -    | P1314L | 47.6 | D398N | 95.7 |
| 522 | vailidation | -      | - | -       | -    | -    | H1948P | 46.7 | -    | -    | -     | -    | P1314L | 5.9  | D398N | 95.2 |
| 523 | vailidation | -      | - | -       | T30I | 52.1 | H1948P | 93   | -    | -    | R112C | 51.4 | P1314L | 65.3 | D398N | 95.4 |
| 524 | vailidation | -      | - | -       | -    | -    | -      | -    | -    | -    | -     | -    | -      | -    | -     | -    |
| 525 | vailidation | -      | - | -       | -    | -    | -      | -    | -    | -    | -     | -    | -      | -    | -     | -    |
| 526 | vailidation | -      | - | -       | -    | -    | -      | -    | -    | -    | -     | -    | -      | -    | -     | -    |
| 527 | vailidation | -      | - | -       | T30I | 70.9 | -      | -    | -    | -    | -     | -    | P1314L | 45.1 | D398N | 94.1 |
| 528 | vailidation | -      | - | -       | T30I | 26.6 | H1948P | 36.3 | I95V | 59.3 | -     | -    | P1314L | 91.9 | -     | -    |
| 529 | vailidation | -      | - | -       | -    | -    | H1948P | 44.8 | I95V | 53.9 | -     | -    | P1314L | 97.5 | D398N | 87.7 |
| 530 | vailidation | -      | - | -       | -    | -    | H1948P | 100  | -    | -    | -     | -    | P1314L | 96.6 | D398N | 87.4 |

|     |             |        |   |         |      |      |        |      |      |      |       |      |        |      |       |      |
|-----|-------------|--------|---|---------|------|------|--------|------|------|------|-------|------|--------|------|-------|------|
| 531 | vailidation | -      | - | -       | T30I | 41.1 | -      | -    | -    | -    | R112C | 47.1 | P1314L | 55.5 | D398N | 95.5 |
| 532 | vailidation | Exon 4 | - | Exon 15 | -    | -    | -      | -    | -    | -    | -     | -    | P1314L | 62.5 | D398N | 92   |
| 533 | vailidation | -      | - | -       | -    | -    | H1948P | 66.2 | -    | -    | -     | -    | P1314L | 97   | D398N | 81.9 |
| 534 | vailidation | -      | - | -       | -    | -    | H1948P | 50.6 | -    | -    | R112C | 10.2 | -      | -    | D398N | 16.9 |
| 535 | vailidation | -      | - | -       | -    | -    | -      | -    | I95V | 48.7 | -     | -    | -      | -    | -     | -    |
| 536 | vailidation | -      | - | -       | -    | -    | -      | -    | -    | -    | -     | -    | -      | -    | D398N | 86.9 |
| 537 | vailidation | -      | - | Exon 15 | -    | -    | -      | -    | -    | -    | -     | -    | -      | -    | -     | -    |
| 538 | vailidation | -      | - | -       | -    | -    | H1948P | 100  | -    | -    | -     | -    | P1314L | 36.3 | D398N | 85.7 |
| 539 | vailidation | -      | - | -       | -    | -    | H1948P | 73.4 | -    | -    | -     | -    | P1314L | 47.6 | D398N | 77.6 |
| 540 | vailidation | -      | - | -       | T30I | 63.6 | H1948P | 19   | I95V | 52.2 | -     | -    | -      | -    | -     | -    |
| 541 | vailidation | -      | - | Exon 15 | T30I | 15   | H1948P | 12.5 | I95V | 25   | -     | -    | P1314L | 90.5 | -     | -    |
| 542 | vailidation | -      | - | Exon 15 | -    | -    | -      | -    | I95V | 59   | -     | -    | -      | -    | -     | -    |
| 543 | vailidation | -      | - | -       | -    | -    | -      | -    | -    | -    | R112C | 49.1 | -      | -    | D398N | 93.1 |
| 544 | vailidation | -      | - | -       | T30I | 45.8 | -      | -    | I95V | 57.4 | -     | -    | P1314L | 92.9 | D398N | 90.5 |

Patient 96, 406 and 409 with insufficient quality of sequencing library and patients 1, 17 and 452 with insufficient amount of DNA extracted.

KRAS, NRAS and BRAF mutations were tested by ARMS. Several mutations shared the same PCR tube and are not distinguished respectively (Supplementary Table 5). Other mutations were tested by NGS.

**Table S8. Efficacy outcomes according to PI3KCA and BRAF status in RAS wild-type patients**

|                                         | RAS wild-type                  |                       | RAS/BRAF wild-type             |                       | RAS wild-type/BRAF mutant      |                       | RAS/PI3KCA wild-type           |                       | RAS/BRAF/PI3KCA treble wild-type |                       |
|-----------------------------------------|--------------------------------|-----------------------|--------------------------------|-----------------------|--------------------------------|-----------------------|--------------------------------|-----------------------|----------------------------------|-----------------------|
|                                         | Cetuximab plus<br>chemotherapy | Chemotherapy<br>alone | Cetuximab plus<br>chemotherapy | Chemotherapy<br>alone | Cetuximab plus<br>chemotherapy | Chemotherapy<br>alone | Cetuximab plus<br>chemotherapy | Chemotherapy<br>alone | Cetuximab plus<br>chemotherapy   | Chemotherapy<br>alone |
|                                         | (n=45)                         | (n=48)                | (n=38)                         | (n=41)                | (n=7)                          | (n=7)                 | (n=38)                         | (n=44)                | (n=31)                           | (n=37)                |
| ORR, %                                  | 62.2                           | 29.2                  | 63.2                           | 31.7                  | 57.1                           | 14.3                  | 60.5                           | 27.3                  | 61.3                             | 29.7                  |
| Odd ratios                              | 4.00                           |                       | 3.69                           |                       | 8.00                           |                       | 4.09                           |                       | 3.74                             |                       |
| 95%CI                                   | 1.68-9.51                      |                       | 1.46-9.37                      |                       | 0.60-107.0                     |                       | 1.62-10.35                     |                       | 1.36-10.27                       |                       |
| <i>P</i> value<br>( <i>chi-square</i> ) | 0.002                          |                       | 0.005                          |                       | 0.266                          |                       | 0.002                          |                       | 0.009                            |                       |
| <i>P</i> value for<br>interaction test  | -                              |                       |                                | 0.582*                |                                |                       | 0.723**                        |                       | 0.807***                         |                       |
| Resection rate<br>of LM, %              | 28.8                           | 8.3                   | 28.9                           | 9.8                   | 28.6                           | 0.0                   | 31.6                           | 9.1                   | 32.3                             | 10.8                  |
| Odd ratios                              | 4.47                           |                       | 3.69                           |                       | 8.00                           |                       | 4.62                           |                       | 3.93                             |                       |
| 95%CI                                   | 1.33-14.98                     |                       | 1.46-9.37                      |                       | 0.60-106.9                     |                       | 1.34-15.86                     |                       | 1.09-14.16                       |                       |
| <i>P</i> value<br>( <i>chi-square</i> ) | 0.01                           |                       | 0.03                           |                       | 0.127                          |                       | 0.010                          |                       | 0.029                            |                       |
| PFS, months                             |                                |                       |                                |                       |                                |                       |                                |                       |                                  |                       |
| Median                                  | 9.8                            | 5.3                   | 9.7                            | 5.6                   | 12.1                           | 4.2                   | 9.8                            | 5.5                   | 9.7                              | 5.8                   |
| Hazard ratios                           | 0.52                           |                       | 0.57                           |                       | 0.21                           |                       | 0.54                           |                       | 0.60                             |                       |
| 95%CI                                   | 0.33-0.81                      |                       | 0.35-0.91                      |                       | 0.04-1.07                      |                       | 0.34-0.88                      |                       | 0.36-1.01                        |                       |
| <i>P</i> value<br>( <i>log-rank</i> )   | 0.002                          |                       | 0.011                          |                       | 0.025                          |                       | 0.007                          |                       | 0.036                            |                       |
| <i>P</i> value for<br>interaction test  | -                              |                       |                                | 0.142*                |                                |                       | 0.376**                        |                       | 0.080***                         |                       |
| OS, months                              |                                |                       |                                |                       |                                |                       |                                |                       |                                  |                       |
| Median                                  | 35.1                           | 21.7                  | 37.1                           | 21.8                  | 24.5                           | 20.0                  | 36.8                           | 21.8                  | 38.1                             | 22.0                  |
| Hazard ratios                           | 0.44                           |                       | 0.40                           |                       | 0.78                           |                       | 0.42                           |                       | 0.37                             |                       |

|                                        |           |           |           |           |           |
|----------------------------------------|-----------|-----------|-----------|-----------|-----------|
| 95%CI                                  | 0.23-0.83 | 0.20-0.83 | 0.15-4.00 | 0.21-0.84 | 0.17-0.83 |
| <i>P</i> value<br>(log-rank)           | 0.009     | 0.010     | 0.700     | 0.011     | 0.011     |
| <i>P</i> value for<br>interaction test | -         | 0.440*    |           | 0.728**   | 0.656***  |

NE, not evaluable

\* *P* values for the interaction between BRAF status and treatment

\*\* *P* values for the interaction between PI3KCA status and treatment.

\*\*\* *P* values for the interaction between combination of BRAF and PI3CA (double wild-type vs. any mutant) and treatment (cetuximab + chemotherapy vs. chemotherapy)



**Table S9. Summary of the first-step procedure of selecting potential predictive biomarker**

| Gene ID  | Codon* | Mutation number | Mutation rate**, % | P value of interaction test for ORR |
|----------|--------|-----------------|--------------------|-------------------------------------|
| ABL1     | 578    | 13              | 12.3               | NS                                  |
|          | All    | 34              | 32.1               | NS                                  |
| ACTN4    | 400    | 60              | 56.6               | NS                                  |
|          | All    | 81              | 76.4               | NS                                  |
| AKT1     | All    | 14              | 13.2               | NS                                  |
| ATAD3B   | 386    | 82              | 77.4               | NS                                  |
|          | 579    | 38              | 35.8               | NS                                  |
|          | All    | 87              | 82.1               | NS                                  |
| ATP6V1B1 | 30     | 43              | 40.6               | 0.054                               |
| BRAC1    | 1183   | 61              | 57.5               | NS                                  |
|          | 871    | 61              | 57.5               | NS                                  |
|          | All    | 76              | 71.7               | NS                                  |
| CD34     | All    | 16              | 15.1               | NS                                  |
| CDH1     | All    | 15              | 14.2               | NS                                  |
| CDKN2A   | All    | 18              | 17                 | NS                                  |
| COL1A1   | All    | 13              | 12.3               | NS                                  |
| COL2A1   | 1405   | 67              | 63.2               | NS                                  |
|          | All    | 76              | 71.7               | NS                                  |
| CSFR1    | All    | 12              | 11.3               | NS                                  |
| CTBNN1   | All    | 13              | 12.3               | NS                                  |
| CUL9     | 1948   | 72              | 67.9               | 0.024                               |
|          | All    | 80              | 75.5               | 0.018                               |
| DST      | All    | 10              | 9.4                | NS                                  |
| EGFR     | 468    | 82              | 77.4               | NS                                  |
|          | All    | 82              | 77.4               | NS                                  |
| ERBB2    | 95     | 24              | 22.6               | 0.062                               |
|          | 1155   | 52              | 49.1               | NS                                  |
|          | All    | 71              | 67                 | NS                                  |
| ESRRA    | All    | 20              | 18.9               | NS                                  |
| FAM129A  | 609    | 22              | 20.8               | NS                                  |
|          | All    | 31              | 29.2               | NS                                  |
| FBXW7    | ALL    | 12              | 11.3               | NS                                  |
| FCGBP    | 1340   | 46              | 43.4               | NS                                  |
|          | 15     | 20              | 18.9               | NS                                  |
| FGFR2    | 429    | 16              | 15.1               | NS                                  |
|          | All    | 32              | 30.2               | NS                                  |
| FGFR3    | All    | 18              | 17                 | NS                                  |
| FLT3     | All    | 13              | 12.3               | NS                                  |
| G6PD     | All    | 60              | 57                 | NS                                  |
| GNA11    | All    | 68              | 64.2               | NS                                  |
| POU5F1B  | 214    | 17              | 16                 | NS                                  |

|          |      |    |      |       |
|----------|------|----|------|-------|
|          | All  | 16 | 15.1 | NS    |
| PTPN11   | All  | 13 | 12.3 | NS    |
| KIT      | All  | 33 | 31.1 | NS    |
| LY6G6D   | 112  | 23 | 21.7 | 0.014 |
| LAMA4    | 1119 | 59 | 55.7 | NS    |
|          | 490  | 16 | 15.1 | NS    |
| MAGEC1   | 151  | 19 | 17.9 | NS    |
|          | 241  | 30 | 28.3 | NS    |
|          | All  | 55 | 51.9 | 0.084 |
| MDC1     | 1873 | 43 | 40.6 | NS    |
|          | 1558 | 59 | 55.7 | NS    |
|          | 1354 | 13 | 12.3 | NS    |
|          | 1349 | 16 | 15.1 | NS    |
|          | 1316 | 25 | 23.6 | NS    |
|          | 241  | 16 | 15.1 | NS    |
|          | 512  | 12 | 11.3 | NS    |
| MDN1     | 862  | 12 | 11.3 | NS    |
|          | 440  | 41 | 38.7 | NS    |
|          | All  | 62 | 58.5 | NS    |
| MEGF6    | 1137 | 27 | 25.5 | NS    |
|          | 125  | 61 | 57.5 | NS    |
|          | All  | 94 | 88.7 | NS    |
| MET      | All  | 22 | 20.8 | NS    |
| MICB     | 80   | 44 | 41.5 | 0.08  |
|          | 89   | 12 | 11.3 | NS    |
|          | 104  | 46 | 43.4 | NS    |
| MMP2     | All  | 39 | 36.8 | NS    |
| MPL      | All  | 18 | 17   | NS    |
| NOTCH1   | All  | 17 | 16   | NS    |
| PDCD1LG2 | All  | 18 | 17   | NS    |
| PDGFRA   | All  | 21 | 19.8 | NS    |
| PTCH1    | 1314 | 67 | 63.2 | 0.017 |
|          | All  | 82 | 77.4 | 0.061 |
| PTPN23   | 818  | 54 | 19.8 | NS    |
|          | 1121 | 21 | 19.8 | NS    |
|          | All  | 77 | 72.6 | 0.091 |
| RBMXL3   | 398  | 56 | 52.8 | 0.039 |
|          | 1006 | 15 | 14.2 | NS    |
|          | 1049 | 13 | 12.3 | NS    |
|          | All  | 85 | 80.2 | 0.042 |
| RET      | 336  | 13 | 12.3 | NS    |
|          | All  | 36 | 34   | NS    |
| SERBP1   | All  | 11 | 10.4 | NS    |
| STK11    | All  | 20 | 18.9 | NS    |
| TAPBP    | 84   | 16 | 15.1 | NS    |

|        |      |    |      |    |
|--------|------|----|------|----|
|        | 70   | 33 | 31.1 | NS |
|        | All  | 82 | 77.4 | NS |
| THBS1  | All  | 15 | 14.2 | NS |
| TP53   | 72   | 81 | 76.4 | NS |
|        | 175  | 16 | 15.1 | NS |
| TNXB   | All  | 15 | 14.2 | NS |
| TYK2   | 362  | 64 | 60.4 | NS |
|        | All  | 79 | 74.5 | NS |
| ZNF462 | 1828 | 76 | 71.7 | NS |
|        | 404  | 21 | 19.8 | NS |
|        | All  | 83 | 78.3 | NS |

NS, not significant ( $p > 0.10$ )

\* "All" indicated that mutational status of a given gene was determined by all mutations sequenced; Numbers indicated that mutational status of a given gene was determined by specific codon.

\*\*was calculated among all sequenced samples

**Table S10. Summary of the second-step procedure of selecting potential predictive biomarker**

| Gene ID  | Codon <sup>*</sup> | Mutation number | Mutation rate, % | Unadjusted pvalue for interaction test | Adjusted with propensity score |
|----------|--------------------|-----------------|------------------|----------------------------------------|--------------------------------|
| ATP6V1B1 | 30                 | 43              | 40.6             | 0.054                                  | 0.033                          |
| CUL9     | 1948               | 80              | 75.5             | 0.008                                  | 0.005                          |
| ERBB2    | 95                 | 24              | 22.6             | 0.062                                  | 0.048                          |
| LY6G6D   | 112                | 23              | 21.7             | 0.014                                  | 0.007                          |
| MAGEC1   | All                | 55              | 51.9             | 0.077                                  | 0.07                           |
| PTCH1    | 1314               | 67              | 63.2             | 0.017                                  | 0.018                          |
| PTPN23   | All                | 77              | 72.6             | 0.097                                  | 0.142                          |
| RBMXL3   | 398                | 56              | 52.8             | 0.039                                  | 0.045                          |

\* "All" indicated that mutational status of a given gene was determined by all mutations sequenced; Numbers indicated that mutational status of a given gene was determined by specific codon.

\*\* Adjusted estimated propensity score based on age (>65 years vs. ≤65 years), gender (male vs. female), ECOG PS (0 vs. 1), primary tumor location (right-sided vs. left-sided + rectum), number of liver metastases (≤4 vs. >4) and maximum size of liver metastases (>5cm vs. ≤5cm).

**Table S11. Efficacy outcomes according to mutation status in RAS wild-type patients.**

| Gene ID   | Codon | Mutation status | Number | PFS             |                         |                  | OS              |                         |              | ORR           |                         |                  |
|-----------|-------|-----------------|--------|-----------------|-------------------------|------------------|-----------------|-------------------------|--------------|---------------|-------------------------|------------------|
|           |       |                 |        | Hazard ratios** | 95% Confidence interval | P value          | Hazard ratios** | 95% Confidence interval | P value      | Odds ratios** | 95% Confidence interval | P value          |
| ATP6V1 B1 | 30    | Wild-type       | 55     | <b>0.50</b>     | <b>0.27-0.90</b>        | <b>0.022</b>     | 0.45            | 0.20-1.03               | 0.058        | <b>8.57</b>   | <b>2.55-28.85</b>       | <b>0.001</b>     |
|           |       | Mutant          | 38     | 0.49            | 0.24-1.002              | 0.051            | 0.43            | 0.15-1.27               | 0.125        | 1.48          | 0.40-5.49               | 0.553            |
| CUL9      | 1948  | Wild-type       | 31     | 0.77            | 0.37-1.63               | 0.497            | 0.71            | 0.24-2.08               | 0.531        | 0.86          | 0.21-3.58               | 0.833            |
|           |       | Mutant          | 62     | <b>0.41</b>     | <b>0.23-0.72</b>        | <b>0.002</b>     | <b>0.31</b>     | <b>0.13-0.75</b>        | <b>0.009</b> | <b>11.0</b>   | <b>3.26-37.14</b>       | <b>&lt;0.001</b> |
| ERBB2     | 95    | Wild-type       | 72     | <b>0.42</b>     | <b>0.25-0.72</b>        | <b>0.001</b>     | <b>0.29</b>     | <b>0.13-0.63</b>        | <b>0.002</b> | <b>6.02</b>   | <b>2.16-16.8</b>        | <b>0.001</b>     |
|           |       | Mutant          | 21     | 1.11            | 0.41-2.98               | 0.843            | 1.69            | 0.40-7.19               | 0.476        | 1.5           | 0.20-11.5               | 0.697            |
| LY6G6D    | 112   | Wild-type       | 74     | <b>0.34</b>     | <b>0.20-0.58</b>        | <b>&lt;0.001</b> | <b>0.28</b>     | <b>0.13-0.59</b>        | <b>0.001</b> | <b>7.28</b>   | <b>2.61-20.3</b>        | <b>&lt;0.001</b> |
|           |       | Mutant          | 19     | 1.62            | 0.60-4.37               | 0.344            | 3.01            | 0.46-19.5               | 0.249        | 0.43          | 0.06-3.22               | 0.41             |
| PTCH1     | 1314  | Wild-type       | 34     | 0.86            | 0.39-1.90               | 0.705            | 0.67            | 0.23-1.98               | 0.472        | 1.09          | 0.28-4.32               | 0.901            |
|           |       | Mutant          | 59     | <b>0.39</b>     | <b>0.22-0.70</b>        | <b>0.002</b>     | <b>0.34</b>     | <b>0.14-0.82</b>        | <b>0.017</b> | <b>10.3</b>   | <b>3.06-34.6</b>        | <b>&lt;0.001</b> |
| RBMXL3    | 398   | Wild-type       | 43     | 0.6             | 0.21-1.73               | 0.342            | 1.30            | 0.21-8.11               | 0.777        | 0.83          | 0.15-4.64               | 0.835            |
|           |       | Mutant          | 50     | <b>0.50</b>     | <b>0.30-0.83</b>        | <b>0.007</b>     | <b>0.36</b>     | <b>0.17-0.73</b>        | <b>0.005</b> | <b>6.95</b>   | <b>2.43-19.83</b>       | <b>&lt;0.001</b> |

\* "All" indicated that mutational status of a given gene was determined by all mutations sequenced; Numbers indicated that mutational status of a given gene was determined by specific codon.

\*\* were calculated with cetuximab arm compared with chemotherapy arm

**Table S12. Predictor value and coefficients in the predictive model**

|                 | Coefficients | Standard error | P value | Hazard ratios | Predictor value    |                             |
|-----------------|--------------|----------------|---------|---------------|--------------------|-----------------------------|
|                 |              |                |         |               | 0                  | 1                           |
| ATP6V1B1 status | -0.165       | 0.519          | 0.750   | 1.180         | Wild-type          | Mutant                      |
| CUL9 status     | -0.726       | 0.541          | 0.180   | 2.067         | Wild-type          | Mutant                      |
| ERBB2 status    | -1.140       | 0.618          | 0.065   | 3.127         | Wild-type          | Mutant                      |
| LY6G6D status   | -0.944       | 0.639          | 0.140   | 2.570         | Wild-type          | Mutant                      |
| RBMXL3 status   | -0.477       | 0.587          | 0.417   | 1.611         | Wild-type          | Mutant                      |
| PTCH1 status    | 0.821        | 0.567          | 0.147   | 0.440         | Wild-type          | Mutant                      |
| Treatment       | 1.771        | 0.506          | 0.000   | 5.878         | Chemotherapy alone | Cetuximab plus chemotherapy |
| Constant value  | -0.255       | 0.634          | 0.688   | 0.775         | -                  | -                           |

**Table S13. Predictive model and primary tumor location**

| Left-sided                          | Model-defined Responsive group |                    | Model-defined Refractory group |                    |
|-------------------------------------|--------------------------------|--------------------|--------------------------------|--------------------|
|                                     | (N=108)                        |                    | (N=50)                         |                    |
|                                     | Cetuximab plus chemotherapy    | Chemotherapy alone | Cetuximab plus chemotherapy    | Chemotherapy alone |
|                                     | (N=54)                         | (N=54)             | (N=20)                         | (N=30)             |
| ORR, %                              | 85.2                           | 29.6               | 25.0                           | 30.0               |
| Odd ratios                          |                                | 13.66              |                                | 0.78               |
| 95%CI                               |                                | 5.28-35.36         |                                | 0.22-2.79          |
| <i>P</i> value (chi-square)         |                                | <0.001             |                                | 0.700              |
| <i>P</i> value for interaction test |                                |                    | <0.001                         |                    |
| Resection rate of LM, %             | 42.6                           | 9.3                | 15                             | 13.3               |
| Odd ratios                          |                                | 7.27               |                                | 1.15               |
| 95%CI                               |                                | 2.50-21.13         |                                | 0.23-5.78          |
| <i>P</i> value (chi-square)         |                                | <0.001             |                                | 0.868              |
| <i>P</i> value for interaction test |                                |                    | 0.062                          |                    |
| PFS, months                         |                                |                    |                                |                    |
| Median                              | 12.7                           | 4.8                | 8.8                            | 7.9                |
| Hazard ratios                       |                                | 0.35               |                                | 0.90               |
| 95%CI                               |                                | 0.22-0.54          |                                | 0.49-1.64          |
| <i>P</i> value (log-rank)           |                                | <0.001             |                                | 0.706              |
| <i>P</i> value for interaction test |                                |                    | 0.006                          |                    |
| OS, months                          |                                |                    |                                |                    |
| Median                              | 48.0                           | 21.7               | 26.6                           | 23.8               |
| Hazard ratios                       |                                | 0.12               |                                | 0.91               |
| 95%CI                               |                                | 0.05-0.31          |                                | 0.37-2.22          |
| <i>P</i> value (log-rank)           |                                | <0.001             |                                | 0.986              |
| <i>P</i> value for interaction test |                                |                    | 0.002                          |                    |
| Right-sided                         | Model-defined Responsive group |                    | Model-defined Refractory group |                    |
|                                     | (N=41)                         |                    | (N=17)                         |                    |
|                                     | Cetuximab plus chemotherapy    | Chemotherapy alone | Cetuximab plus chemotherapy    | Chemotherapy alone |
|                                     | (N=17)                         | (N=24)             | (N=12)                         | (N=5)              |
| ORR, %                              | 70.6                           | 29.2               | 25.0                           | 20.0               |
| Odd ratios                          |                                | 5.83               |                                | 1.33               |
| 95%CI                               |                                | 1.49-22.82         |                                | 0.10-17.10         |
| <i>P</i> value (chi-square)         |                                | 0.009              |                                | 1.000              |
| <i>P</i> value for interaction test |                                |                    | 0.318                          |                    |
| Resection rate of LM, %             | 29.4                           | 8.3                | 8.3                            | 0                  |
| Odd ratios                          |                                | 4.58               |                                | 0.99               |
| 95%CI                               |                                | 0.77-27.30         |                                | -                  |
| <i>P</i> value (chi-square)         |                                | 0.105              |                                | 1.000              |
| PFS, months                         |                                |                    |                                |                    |
| Median                              | 9                              | 4.8                | 7.0                            | 7.0                |

|                                     |      |           |       |            |
|-------------------------------------|------|-----------|-------|------------|
| Hazard ratios                       |      | 0.55      |       | 0.77       |
| 95%CI                               |      | 0.27-1.15 |       | 0.26-2.27  |
| <i>P</i> value (log-rank)           |      | 0.071     |       | 0.599      |
| <i>P</i> value for interaction test |      |           | 0.386 |            |
| OS, months                          |      |           |       |            |
| Median                              | 25.8 |           | 15.5  | 20.2       |
| Hazard ratios                       |      | 0.41      |       | 2.48       |
| 95%CI                               |      | 0.18-0.95 |       | 0.53-11.35 |
| <i>P</i> value (log-rank)           |      | 0.030     |       | 0.226      |
| <i>P</i> value for interaction test |      |           | 0.030 |            |



**Table S2. Driver somatic mutations detected by WES**

| Pat<br>ient<br>ID | Sampl<br>e type         | Sample type 2                                    | Chromo<br>somal<br>location | Gen<br>e<br>Sym<br>bol | Gene Description                                              | Ensem<br>bl<br>transcri<br>pt<br>identifi<br>er | Ensembl<br>protein<br>identifier | Prote<br>in<br>positi<br>on | A<br>mino<br>acid<br>chan<br>ge | Codo<br>n<br>variati<br>on | Existi<br>ng | S<br>l<br>F<br>T | Pol<br>yph<br>en-<br>2 | Mutati<br>on<br>asses<br>sor | SIFT-<br>Tran<br>sFIC | SIFT-Tr<br>ansFIC<br>Label | Polyph<br>en-2<br>TransFI<br>C | Polyphen-<br>2<br>TransFIC<br>Label | Mutation<br>assessor<br>TransFIC | Mutation<br>assessor<br>TransFIC<br>Label |
|-------------------|-------------------------|--------------------------------------------------|-----------------------------|------------------------|---------------------------------------------------------------|-------------------------------------------------|----------------------------------|-----------------------------|---------------------------------|----------------------------|--------------|------------------|------------------------|------------------------------|-----------------------|----------------------------|--------------------------------|-------------------------------------|----------------------------------|-------------------------------------------|
| 1                 | Liver<br>metas<br>tases | Private in<br>metastatic<br>tumor                | 12:5045<br>3703             | AC<br>CN2              | amiloride-sensitive cation channel 2, neuronal                | ENST0<br>00004<br>47966                         | ENSP00<br>0004002<br>28          | 175                         | R/<br>P                         | cGg/<br>cCg                | -            | .<br>0           | 0.9<br>98              | NA                           | 0.647                 | mediu<br>m_imp<br>act      | 1.705                          | high_imp<br>act                     | NA                               | NA                                        |
| 1                 | Prima<br>ry<br>tumor    | Common in<br>primary and<br>metastatic<br>tumors | 3:64606<br>911              | ADA<br>MT<br>S9        | ADAM metalloproteinase with thrombospondin<br>type 1 motif, 9 | ENST0<br>00002<br>95903                         | ENSP00<br>0002959<br>03          | 870                         | R/<br>W                         | Cgg/<br>Tgg                | -            | .<br>0           | 0.9<br>98              | NA                           | 1.199                 | mediu<br>m_imp<br>act      | 1.687                          | high_imp<br>act                     | NA                               | NA                                        |
| 1                 | Liver<br>metas<br>tases | Common in<br>primary and<br>metastatic<br>tumors | 3:64606<br>911              | ADA<br>MT<br>S9        | ADAM metalloproteinase with thrombospondin<br>type 1 motif, 9 | ENST0<br>00002<br>95903                         | ENSP00<br>0002959<br>03          | 870                         | R/<br>W                         | Cgg/<br>Tgg                | -            | .<br>0           | 0.9<br>98              | NA                           | 1.199                 | mediu<br>m_imp<br>act      | 1.687                          | high_imp<br>act                     | NA                               | NA                                        |
| 1                 | Prima<br>ry<br>tumor    | Private in<br>primary tumor                      | 11:4771<br>2295             | AG<br>BL2              | ATP/GTP binding protein-like 2                                | ENST0<br>00005<br>32595                         | ENSP00<br>0004360<br>63          | 266                         | I/V                             | Att/G<br>tt                | -            | .<br>0           | 0.9<br>97              | NA                           | 0.602                 | mediu<br>m_imp<br>act      | 1.519                          | high_imp<br>act                     | NA                               | NA                                        |
| 1                 | Prima<br>ry<br>tumor    | Private in<br>primary tumor                      | X:55035<br>653              | ALA<br>S2              | aminolevulinic acid, delta-, synthase 2                       | ENST0<br>00003<br>30807                         | ENSP00<br>0003323<br>69          | 575                         | F/<br>S                         | tTc/t<br>Cc                | -            | .<br>0           | 0.9<br>96              | 2.445                        | 2.575                 | high_im<br>pact            | 1.643                          | high_imp<br>act                     | 1.082                            | medium_imp<br>act                         |

|   |                         |                                                  |                  |                  |                                                               |                |                   |      |         |             |                |         |           |       |       |                       |        |                   |        |            |
|---|-------------------------|--------------------------------------------------|------------------|------------------|---------------------------------------------------------------|----------------|-------------------|------|---------|-------------|----------------|---------|-----------|-------|-------|-----------------------|--------|-------------------|--------|------------|
| 1 | Prima<br>ry<br>tumor    | Private in<br>primary tumor                      | 15:8540<br>5995  | ALP<br>K3        | alpha-kinase 3                                                | ENST0<br>00002 | ENSP00<br>0002588 | 1622 | L/<br>P | cTt/c<br>Ct | rs187<br>316   | 0<br>0  | 0.9<br>9  | 1.5   | 2.008 | high_im<br>pact       | 1.46   | medium_i<br>mpact | 0.435  | low_impact |
| 1 | Liver<br>metas<br>tases | Private in<br>metastatic<br>tumor                | 12:1234<br>66614 | ARL<br>6IP4      | ADP-ribosylation-like factor 6 interacting<br>protein 4       | ENST0<br>00004 | ENSP00<br>0003963 | 186  | R/<br>S | Cgc/<br>Agc | -              | 0<br>91 | 0.9       | NA    | 2.062 | high_im<br>pact       | 1.355  | medium_i<br>mpact | NA     | NA         |
| 1 | Prima<br>ry<br>tumor    | Private in<br>primary tumor                      | 7:10271<br>5804  | AR<br>MC<br>10   | armadillo repeat containing 10                                | ENST0<br>00004 | ENSP00<br>0004136 | 29   | R/<br>W | Cgg/<br>Tgg | rs779<br>8381  | 0<br>0  | 0.9<br>98 | NA    | 0.371 | mediu<br>m_imp<br>act | 1.705  | high_imp<br>act   | NA     | NA         |
| 1 | Prima<br>ry<br>tumor    | Common in<br>primary and<br>metastatic<br>tumors | 2:96789<br>798   | AST<br>L         | astacin-like metallo-endopeptidase (M12<br>family)            | ENST0<br>00003 | ENSP00<br>0003436 | 363  | P/<br>S | Cct/T<br>ct | -              | 0<br>08 | 0.8       | 0.895 | 2.174 | high_im<br>pact       | 0.567  | medium_i<br>mpact | -0.137 | low_impact |
| 1 | Liver<br>metas<br>tases | Common in<br>primary and<br>metastatic<br>tumors | 2:96789<br>798   | AST<br>L         | astacin-like metallo-endopeptidase (M12<br>family)            | ENST0<br>00003 | ENSP00<br>0003436 | 363  | P/<br>S | Cct/T<br>ct | -              | 0<br>08 | 0.8       | 0.895 | 2.174 | high_im<br>pact       | 0.567  | medium_i<br>mpact | -0.137 | low_impact |
| 1 | Liver<br>metas<br>tases | Private in<br>metastatic<br>tumor                | 2:71163<br>086   | ATP<br>6V1<br>B1 | ATPase, H+ transporting, lysosomal<br>56/58kDa, V1 subunit B1 | ENST0<br>00004 | ENSP00<br>0003883 | 1    | M/<br>T | aTg/<br>aCg | rs116<br>81642 | 0<br>59 | 0.0       | NA    | 2.106 | high_im<br>pact       | -0.017 | low_imp<br>act    | NA     | NA         |
| 1 | Prima<br>ry<br>tumor    | Private in<br>primary tumor                      | 10:1191<br>1860  | C10<br>orf4<br>7 | chromosome 10 open reading frame 47                           | ENST0<br>00003 | ENSP00<br>0003684 | 59   | S/<br>R | Agc/<br>Cgc | -              | 0<br>7  | 0.9       | NA    | 2.929 | high_im<br>pact       | 0.929  | medium_i<br>mpact | NA     | NA         |
| 1 | Prima<br>ry<br>tumor    | Private in<br>primary tumor                      | 11:6125<br>4511  | C11<br>orf6<br>6 | chromosome 11 open reading frame 66                           | ENST0<br>00005 | ENSP00<br>0004375 | 76   | G/<br>D | gGc/<br>gAc | -              | 0<br>95 | 0.9       | NA    | 2.929 | high_im<br>pact       | 1.384  | medium_i<br>mpact | NA     | NA         |
| 1 | Prima<br>ry<br>tumor    | Common in<br>primary and<br>metastatic           | 1:25570<br>081   | C1o<br>rf63      | chromosome 1 open reading frame 63                            | ENST0<br>00004 | ENSP00<br>0004116 | 240  | E/<br>G | gAa/<br>gGa | rs104<br>3879  | 0<br>07 | 0.9       | NA    | 2.929 | high_im<br>pact       | 0.63   | medium_i<br>mpact | NA     | NA         |

|   |       |             |         |      |                                    |       |         |     |    |       |       |   |     |       |       |         |       |             |             |
|---|-------|-------------|---------|------|------------------------------------|-------|---------|-----|----|-------|-------|---|-----|-------|-------|---------|-------|-------------|-------------|
|   |       | tumors      |         |      |                                    |       |         |     |    |       |       |   |     |       |       |         |       |             |             |
|   |       | Common in   |         |      |                                    |       |         |     |    |       |       |   |     |       |       |         |       |             |             |
| 1 | Liver | primary and | 1:25570 | C1o  | chromosome 1 open reading frame 63 | ENST0 | ENSP00  |     |    |       |       |   |     |       |       |         |       |             |             |
|   | metas | metastatic  | 081     | rf63 |                                    | 00004 | 0004116 | 240 | E/ | gAa/  | rs104 | 0 | 0.9 | NA    | 2.929 | high_im | 0.63  | medium_i    | NA          |
|   | tases | tumors      |         |      |                                    | 17642 | 31      |     | G  | gGa   | 3879  |   | 07  |       |       | pact    |       | mpact       | NA          |
|   |       | Common in   |         |      |                                    |       |         |     |    |       |       |   |     |       |       |         |       |             |             |
| 1 | Prima | primary and | 12:4972 | C1Q  | complement component 1, q          | ENST0 | ENSP00  |     |    |       |       |   |     |       |       |         |       |             |             |
|   | ry    | metastatic  | 9859    | L4   | subcomponent-like 4                | 00003 | 0003352 | 134 | N/ | aaC/  | -     | 0 | 0.9 | 3.95  | 2.062 | high_im | 1.894 | high_impact | 3.076       |
|   | tumor | tumors      |         |      |                                    | 34221 | 85      |     | K  | aaA   |       |   | 99  |       |       | pact    |       | ct          | high_impact |
|   |       | Common in   |         |      |                                    |       |         |     |    |       |       |   |     |       |       |         |       |             |             |
| 1 | Liver | primary and | 12:4972 | C1Q  | complement component 1, q          | ENST0 | ENSP00  |     |    |       |       |   |     |       |       |         |       |             |             |
|   | metas | metastatic  | 9859    | L4   | subcomponent-like 4                | 00003 | 0003352 | 134 | N/ | aaC/  | -     | 0 | 0.9 | 3.95  | 2.062 | high_im | 1.894 | high_impact | 3.076       |
|   | tases | tumors      |         |      |                                    | 34221 | 85      |     | K  | aaA   |       |   | 99  |       |       | pact    |       | ct          | high_impact |
|   |       | Common in   |         |      |                                    |       |         |     |    |       |       |   |     |       |       |         |       |             |             |
| 1 | Prima | primary and | 3:12914 | C3o  | chromosome 3 open reading frame 25 | ENST0 | ENSP00  |     |    |       |       |   |     |       |       |         |       |             |             |
|   | ry    | metastatic  | 0499    | rf25 |                                    | 00005 | 0004208 | 66  | E/ | gAg/  | rs377 | 0 | 0.9 | NA    | 2.075 | high_im | 0.91  | medium_i    | NA          |
|   | tumor | tumors      |         |      |                                    | 05956 | 54      |     | G  | gGg   | 4787  |   | 55  |       |       | pact    |       | mpact       | NA          |
|   |       | Common in   |         |      |                                    |       |         |     |    |       |       |   |     |       |       |         |       |             |             |
| 1 | Liver | primary and | 3:12914 | C3o  | chromosome 3 open reading frame 25 | ENST0 | ENSP00  |     |    |       |       |   |     |       |       |         |       |             |             |
|   | metas | metastatic  | 0499    | rf25 |                                    | 00005 | 0004208 | 66  | E/ | gAg/  | rs377 | 0 | 0.9 | NA    | 2.075 | high_im | 0.91  | medium_i    | NA          |
|   | tases | tumors      |         |      |                                    | 05956 | 54      |     | G  | gGg   | 4787  |   | 55  |       |       | pact    |       | mpact       | NA          |
|   |       | Private in  |         |      |                                    |       |         |     |    |       |       |   |     |       |       |         |       |             |             |
| 1 | Liver | metastatic  | 19:1512 | CC   | coiled-coil domain containing 105  | ENST0 | ENSP00  |     |    |       |       |   |     |       |       |         |       |             |             |
|   | metas | tumor       | 1684    | DC1  |                                    | 00002 | 0002925 | 16  | V/ | gTt/g | -     | 0 | 0.7 | 0.975 | 2.929 | high_im | 0.388 | medium_i    | 0.08        |
|   | tases | tumors      |         |      |                                    | 92574 | 74      |     | G  | Gt    |       |   | 88  |       |       | pact    |       | mpact       | low_impact  |
|   |       | Common in   |         |      |                                    |       |         |     |    |       |       |   |     |       |       |         |       |             |             |
| 1 | Prima | primary and | 1:44461 | CC   | coiled-coil domain containing 24   | ENST0 | ENSP00  |     |    |       |       |   |     |       |       |         |       |             |             |
|   | ry    | metastatic  | 822     | DC2  |                                    | 00003 | 0003613 | 305 | A/ | gCc/  | rs230 | 0 | 0.8 | 0.895 | 2.929 | high_im | 0.46  | medium_i    | -0.008      |
|   | tumor | tumors      |         |      |                                    | 72318 | 92      |     | V  | gTc   | 1983  |   | 32  |       |       | pact    |       | mpact       | low_impact  |
|   |       | Common in   |         |      |                                    |       |         |     |    |       |       |   |     |       |       |         |       |             |             |
| 1 | Liver | primary and | 1:44461 | CC   | coiled-coil domain containing 24   | ENST0 | ENSP00  |     |    |       |       |   |     |       |       |         |       |             |             |
|   | metas | tumor       | 822     | DC2  |                                    | 00003 | 0003613 | 305 | A/ | gCc/  | rs230 | 0 | 0.8 | 0.895 | 2.929 | high_im | 0.46  | medium_i    | -0.008      |
|   | tases | tumors      |         |      |                                    |       |         |     | V  | gTc   | 1983  |   | 32  |       |       | pact    |       | mpact       | low_impact  |

|   |       |               |         |     |       |         |     |    |       |       |   |     |       |       |         |        |          |            |
|---|-------|---------------|---------|-----|-------|---------|-----|----|-------|-------|---|-----|-------|-------|---------|--------|----------|------------|
|   | tases | metastatic    | 4       |     | 72318 | 92      |     |    |       |       |   |     |       |       |         |        |          |            |
|   |       | tumors        |         |     |       |         |     |    |       |       |   |     |       |       |         |        |          |            |
| 1 | Prima | Private in    | 1:27709 | CD1 | ENST0 | ENSP00  |     |    |       |       |   |     |       |       |         |        |          |            |
|   | ry    | primary tumor | 140     | 64L | 00003 | 0003631 | 36  | F/ | Ttt/G | -     | 0 | 0.6 | NA    | 2.929 | high_im | 0.2    | medium_i | NA         |
|   | tumor |               |         | 2   | 74025 | 37      |     | V  | tt    |       |   | 36  |       | pact  |         | mpact  | NA       | NA         |
|   |       |               |         |     |       |         |     |    |       |       | 0 |     |       |       |         |        |          |            |
| 1 | Liver | Private in    | 1:11730 |     | ENST0 | ENSP00  |     |    |       |       |   |     |       |       |         |        |          |            |
|   | metas | metastatic    | 7204    | CD2 | 00003 | 0003584 | 238 | K/ | Aaa/  | -     | . | 0.9 | 2.095 | -0.04 | low_im  | 1.53   | highimpa | 1.48       |
|   | tases | tumor         |         | CD2 | 69478 | 90      |     | E  | Gaa   |       | 1 | 93  |       | 3     | pact    |        | ct       | act        |
|   |       |               |         |     |       |         |     |    |       |       | 9 |     |       |       |         |        |          |            |
| 1 | Prima | Private in    | 16:6786 | CE  | ENST0 | ENSP00  |     |    |       |       |   |     |       |       |         |        |          |            |
|   | ry    | primary tumor | 5940    | NPT | 00004 | 0004001 | 121 | S/ | Tcc/  | -     | 0 | 0.6 | 2.19  | 2.051 | high_im | 0.342  | medium_i | 1.297      |
|   | tumor |               |         |     | 40851 | 40      |     | A  | Gcc   |       |   | 32  |       |       | pact    |        | mpact    | act        |
|   |       |               |         |     |       |         |     |    |       |       |   |     |       |       |         |        |          |            |
| 1 | Prima | Private in    | 15:9352 | CH  | ENST0 | ENSP00  |     |    |       |       |   |     |       |       |         |        |          |            |
|   | ry    | primary tumor | 1491    | D2  | 00003 | 0003777 | 869 | A/ | Gct/  | -     | 0 | 0.9 | 3.42  | 2.175 | high_im | 1.389  | medium_i | 2.458      |
|   | tumor |               |         | 2   | 94196 | 47      |     | T  | Act   |       |   | 93  |       |       | pact    |        | mpact    | act        |
|   |       |               |         |     |       |         |     |    |       |       |   |     |       |       |         |        |          |            |
| 1 | Prima | Common in     | 8:12122 | COL | ENST0 | ENSP00  |     |    |       |       |   |     |       |       |         |        |          |            |
|   | ry    | primary and   | 8679    | 14A | 00005 | 0004291 | 320 | N/ | Aat/  | rs487 | . | 1   | NA    | 0.137 | mediu   | 1.723  | highimpa | NA         |
|   | tumor | metastatic    |         | 1   | 23142 | 23      |     | H  | Cat   | 0723  | 1 | 1   |       |       | m_imp   | act    | ct       | NA         |
|   |       | tumors        |         |     |       |         |     |    |       |       | 1 |     |       |       |         |        |          | NA         |
|   |       |               |         |     |       |         |     |    |       |       | 0 |     |       |       |         |        |          |            |
| 1 | Liver | Common in     | 8:12122 | COL | ENST0 | ENSP00  |     |    |       |       |   |     |       |       |         |        |          |            |
|   | metas | primary and   | 8679    | 14A | 00005 | 0004291 | 320 | N/ | Aat/  | rs487 | . | 1   | NA    | 0.137 | mediu   | 1.723  | highimpa | NA         |
|   | tases | metastatic    |         | 1   | 23142 | 23      |     | H  | Cat   | 0723  | 1 | 1   |       |       | m_imp   | act    | ct       | NA         |
|   |       | tumors        |         |     |       |         |     |    |       |       | 1 |     |       |       |         |        |          | NA         |
|   |       |               |         |     |       |         |     |    |       |       | 0 |     |       |       |         |        |          |            |
| 1 | Prima | Common in     | 12:4839 | COL | ENST0 | ENSP00  |     |    |       |       |   |     |       |       |         |        |          |            |
|   | ry    | primary and   | 8080    | 2A1 | 00003 | 0003698 | 9   | T/ | Acg/  | rs380 | 0 | 0   | 0     | 2.263 | high_im | -2.068 | lowimpa  | -1.063     |
|   | tumor | metastatic    |         |     | 80518 | 89      |     | S  | Tcg   | 3183  |   |     |       |       | pact    |        | ct       | low_impact |
|   |       | tumors        |         |     |       |         |     |    |       |       |   |     |       |       |         |        |          |            |
| 1 | Liver | Common in     | 12:4839 | COL | ENST0 | ENSP00  |     |    |       |       |   |     |       |       |         |        |          |            |
|   | metas | primary and   | 8080    | 2A1 | 00003 | 0003786 | 9   | T/ | Acg/  | rs380 | 0 | 0   | NA    | 2.263 | high_im | -2.068 | lowimpa  | NA         |
|   | tases | metastatic    |         |     | 95281 | 96      |     | S  | Tcg   | 3183  |   |     |       |       | pact    |        | ct       | NA         |

| tumors |                         |                                   |                  |                |                                                                                          |                         |                         |      |         |             |                |             |            |                |                       |                |                   |                |                   |    |
|--------|-------------------------|-----------------------------------|------------------|----------------|------------------------------------------------------------------------------------------|-------------------------|-------------------------|------|---------|-------------|----------------|-------------|------------|----------------|-----------------------|----------------|-------------------|----------------|-------------------|----|
| 1      | Prima<br>ry<br>tumor    | Private in<br>primary tumor       | 8:11365<br>1006  | CS<br>MD<br>3  | CUB and Sushi multiple domains 3                                                         | ENST0<br>00003<br>43508 | ENSP00<br>0003457<br>99 | 1109 | L/I     | Ctc/A<br>tc | -              | 0<br>3<br>4 | 0.9<br>98  | NA<br>9        | -0.55<br>9            | low_im<br>pact | 1.613<br>ct       | high_imp<br>ct | NA<br>NA          |    |
| 1      | Prima<br>ry<br>tumor    | Private in<br>primary tumor       | 12:1117<br>48244 | CU<br>X2       | cut-like homeobox 2                                                                      | ENST0<br>00002<br>61726 | ENSP00<br>0002617<br>26 | 553  | L/<br>R | cTg/c<br>Gg | -              | 0<br>0      | 0.9<br>76  | 2.525<br>2.089 | high_im<br>pact       | 1.16<br>mpact  | medium_i<br>mpact | 1.885          | medium_imp<br>act |    |
| 1      | Prima<br>ry<br>tumor    | Private in<br>primary tumor       | 14:2476<br>8248  | DH<br>RS1      | dehydrogenase/reductase (SDR family)<br>member 1                                         | ENST0<br>00003<br>96813 | ENSP00<br>0003800<br>27 | 22   | G/<br>D | gGc/<br>gAc | -              | 0<br>0      | 0.9<br>98  | 2.165<br>1.974 | mediu<br>m_imp<br>act | 1.666<br>ct    | high_imp<br>ct    | 0.672          | low_impact        |    |
| 1      | Liver<br>metas<br>tases | Private in<br>metastatic<br>tumor | 10:1215<br>4945  | DHT<br>KD1     | dehydrogenase E1 and transketolase domain<br>containing 1                                | ENST0<br>00002<br>63035 | ENSP00<br>0002630<br>35 | 734  | M/<br>K | aTg/<br>aAg | -              | 0<br>0      | 0.9<br>8   | 3.8<br>1.729   | mediu<br>m_imp<br>act | 1.559<br>ct    | high_imp<br>ct    | 1.711          | medium_imp<br>act |    |
| 1      | Prima<br>ry<br>tumor    | Private in<br>primary tumor       | 13:6045<br>3394  | DIA<br>PH3     | diaphanous homolog 3 (Drosophila)                                                        | ENST0<br>00002<br>67214 | ENSP00<br>0002672<br>14 | 596  | T/I     | aCc/<br>aTc | -              | 0<br>0      | 0.0<br>61  | NA<br>2.122    | high_im<br>pact       | -0.559<br>ct   | low_imp<br>ct     | NA<br>NA       | NA<br>NA          |    |
| 1      | Prima<br>ry<br>tumor    | Private in<br>primary tumor       | 3:57448<br>553   | DN<br>AH1<br>2 | dynein, axonemal, heavy chain 12                                                         | ENST0<br>00003<br>51747 | ENSP00<br>0002959<br>37 | 777  | R/<br>H | cGt/c<br>At | rs626<br>21232 | 0<br>1      | 1<br>3.545 | 2.056          | high_im<br>pact       | 1.81<br>ct     | high_imp<br>ct    | 2.425          | medium_imp<br>act |    |
| 1      | Prima<br>ry<br>tumor    | Private in<br>primary tumor       | 19:1093<br>5877  | DN<br>M2       | dynammin 2                                                                               | ENST0<br>00003<br>55667 | ENSP00<br>0003478<br>90 | 676  | M/<br>V | Atg/<br>Gtg | -              | 0<br>0      | 0.1<br>51  | NA<br>2.07     | high_im<br>pact       | -0.194<br>ct   | low_imp<br>ct     | NA<br>NA       | NA<br>NA          |    |
| 1      | Prima<br>ry<br>tumor    | Private in<br>primary tumor       | 3:13780<br>7259  | DZI<br>P1L     | DAZ interacting protein 1-like                                                           | ENST0<br>00003<br>27532 | ENSP00<br>0003321<br>48 | 321  | R/<br>W | Cgg/<br>Tgg | rs272<br>4693  | 0<br>4      | 0.9<br>4   | 0<br>2.069     | high_im<br>pact       | 0.912<br>mpact | medium_i<br>mpact | -1.026         | low_impact        |    |
| 1      | Prima<br>ry<br>tumor    | Private in<br>primary tumor       | 10:5067<br>8251  | ER<br>CC6      | excision repair cross-complementing rodent<br>repair deficiency, complementation group 6 | ENST0<br>00003<br>74129 | ENSP00<br>0003632<br>44 | 629  | L/<br>W | tTg/t<br>Gg | -              | 0<br>0      | 1<br>NA    | 2.021          | high_im<br>pact       | 2.04<br>ct     | high_imp<br>ct    | NA<br>NA       | NA<br>NA          |    |
| 1      | Liver                   | Private in                        | 16:8879          | FA             | family with sequence similarity 38, member A                                             | ENST0                   | ENSP00                  | 1225 | P/      | cCt/c       | -              | 0           | 0.9        | NA             | 2.128                 | high_im        | 1.643             | high_imp       | NA                | NA |

|   |       |             |         |     |                                              |       |         |      |    |       |      |    |     |       |       |         |        |               |        |               |
|---|-------|-------------|---------|-----|----------------------------------------------|-------|---------|------|----|-------|------|----|-----|-------|-------|---------|--------|---------------|--------|---------------|
|   | metas | metastatic  | 2824    | M38 |                                              | 00004 | 0004082 |      | H  | At    |      | 98 |     |       | pact  |         | ct     |               |        |               |
|   | tases | tumor       |         | A   |                                              | 51779 | 44      |      |    |       |      |    |     |       |       |         |        |               |        |               |
|   |       |             |         |     |                                              |       |         |      |    |       |      | 0  |     |       |       |         |        |               |        |               |
| 1 | Liver | Private in  | 16:8879 | FA  |                                              | ENST0 | ENSP00  |      | V/ | Gtg/  |      | .  | 0.9 |       |       |         |        |               |        |               |
|   | metas | metastatic  | 2822    | M38 | family with sequence similarity 38, member A | 00004 | 0004082 | 1226 | M  | Atg   | -    | 1  | 98  | NA    | -0.17 | low_im  | 1.643  | high_impact   | NA     | NA            |
|   | tases | tumor       |         | A   |                                              | 51779 | 44      |      |    |       |      | 9  |     |       |       |         |        |               |        |               |
|   |       |             |         |     |                                              |       |         |      |    |       |      |    |     |       |       |         |        |               |        |               |
| 1 | Liver | Private in  | 1:16103 | FBL |                                              | ENST0 | ENSP00  |      | A/ | gCc/  |      | 0  | 0.0 |       |       |         |        |               |        |               |
|   | metas | metastatic  | 727     | IM1 | filamin binding LIM protein 1                | 00003 | 0003649 | 221  | D  | gAc   | -    | 0  | 81  | NA    | 2.069 | high_im | -0.377 | low_impact    | NA     | NA            |
|   | tases | tumor       |         |     |                                              | 32305 | 20      |      |    |       |      |    |     |       |       |         |        |               |        |               |
|   |       |             |         |     |                                              |       |         |      |    |       |      |    |     |       |       |         |        |               |        |               |
| 1 | Liver | Private in  | 1:11710 | FBX |                                              | ENST0 | ENSP00  |      | C/ | tgC/t |      | 0  | 0.9 |       |       |         |        |               |        |               |
|   | metas | metastatic  | 638     | O2  | F-box protein 2                              | 00004 | 0004148 | 92   | W  | gG    | -    | 0  | 97  | NA    | 2.085 | high_im | 1.439  | medium_impact | NA     | NA            |
|   | tases | tumor       |         |     |                                              | 52872 | 26      |      |    |       |      |    |     |       |       |         |        |               |        |               |
|   |       |             |         |     |                                              |       |         |      |    |       |      |    |     |       |       |         |        |               |        |               |
| 1 | Prima | Common in   | 4:15324 | FBX |                                              | ENST0 | ENSP00  |      | R/ | cGa/  | COS  | 0  | 1   | NA    | 2.066 | high_im | 1.96   | high_impact   | NA     | NA            |
|   | ry    | primary and | 7366    | W7  | F-box and WD repeat domain containing 7      | 00003 | 0003775 | 303  | Q  | cAa   | M229 | 0  | 1   | NA    | 2.066 | pact    |        |               |        |               |
|   | tumor | metastatic  |         |     |                                              | 93956 | 28      |      |    |       | 74   |    |     |       |       |         |        |               |        |               |
|   |       | tumors      |         |     |                                              |       |         |      |    |       |      |    |     |       |       |         |        |               |        |               |
|   |       |             |         |     |                                              |       |         |      |    |       |      |    |     |       |       |         |        |               |        |               |
| 1 | Liver | Common in   | 4:15324 | FBX |                                              | ENST0 | ENSP00  |      | R/ | cGa/  | COS  | 0  | 1   | NA    | 2.066 | high_im | 1.96   | high_impact   | NA     | NA            |
|   | metas | primary and | 7366    | W7  | F-box and WD repeat domain containing 7      | 00003 | 0003775 | 303  | Q  | cAa   | M229 | 0  | 1   | NA    | 2.066 | pact    |        |               |        |               |
|   | tases | metastatic  |         |     |                                              | 93956 | 28      |      |    |       | 74   |    |     |       |       |         |        |               |        |               |
|   |       | tumors      |         |     |                                              |       |         |      |    |       |      |    |     |       |       |         |        |               |        |               |
|   |       |             |         |     |                                              |       |         |      |    |       |      |    |     |       |       |         |        |               |        |               |
| 1 | Prima | Common in   | 9:13377 | FIB |                                              | ENST0 | ENSP00  |      | W/ | Tgg/  |      | .  |     |       |       |         |        |               |        |               |
|   | ry    | primary and | 9519    | CD1 | fibrinogen C domain containing 1             | 00003 | 0003614 | 440  | R  | Cgg   | -    | 0  | 1   | 3.22  | 1.019 | mediu   | 1.957  | high_impact   | 2.097  | medium_impact |
|   | tumor | metastatic  |         |     |                                              | 72338 | 13      |      |    |       |      | 1  |     |       |       |         |        |               |        |               |
|   |       | tumors      |         |     |                                              |       |         |      |    |       |      |    |     |       |       |         |        |               |        |               |
|   |       |             |         |     |                                              |       |         |      |    |       |      |    |     |       |       |         |        |               |        |               |
| 1 | Liver | Common in   | 9:13377 | FIB |                                              | ENST0 | ENSP00  |      | W/ | Tgg/  |      | .  |     |       |       |         |        |               |        |               |
|   | metas | primary and | 9519    | CD1 | fibrinogen C domain containing 1             | 00004 | 0004145 | 440  | R  | Cgg   | -    | 0  | 1   | 3.22  | 1.019 | mediu   | 1.957  | high_impact   | 2.097  | medium_impact |
|   | tases | metastatic  |         |     |                                              | 48616 | 01      |      |    |       |      | 1  |     |       |       |         |        |               |        |               |
|   |       | tumors      |         |     |                                              |       |         |      |    |       |      |    |     |       |       |         |        |               |        |               |
|   |       |             |         |     |                                              |       |         |      |    |       |      |    |     |       |       |         |        |               |        |               |
| 1 | Prima | Common in   | 2:18666 | FSI |                                              | ENST0 | ENSP00  |      | L/ | cTt/c |      | .  |     |       |       |         |        |               |        |               |
|   | ry    | primary and | 8645    | P2  | fibrous sheath interacting protein 2         | 00004 | 0004013 | 4871 | R  | Gt    | -    | 0  | 0   | 0.805 | 2.929 | high_im | -1.667 | low_impact    | -0.106 | low_impact    |
|   |       | tumors      |         |     |                                              |       |         |      |    |       |      |    |     |       |       |         |        |               |        |               |

|   |       |               |         |     |                                               |       |         |      |    |       |       |   |     |       |       |         |        |             |        |
|---|-------|---------------|---------|-----|-----------------------------------------------|-------|---------|------|----|-------|-------|---|-----|-------|-------|---------|--------|-------------|--------|
|   | tumor | metastatic    |         |     |                                               | 24728 | 06      |      |    |       |       |   |     |       |       |         |        |             |        |
|   |       | tumors        |         |     |                                               |       |         |      |    |       |       |   |     |       |       |         |        |             |        |
|   | Liver | Common in     |         |     |                                               | ENST0 | ENSP00  |      |    |       |       |   |     |       |       |         |        |             |        |
| 1 | metas | primary and   | 2:18666 | FSI |                                               | 00004 | 0004013 | 4871 | L/ | cTt/c | -     | 0 | 0   | 0.805 | 2.929 | high_im | -1.667 | low_impact  | -0.106 |
|   | tases | metastatic    | 8645    | P2  | fibrous sheath interacting protein 2          |       |         |      | R  | Gt    |       |   |     |       |       | pact    |        | ct          |        |
|   |       | tumors        |         |     |                                               | 24728 | 06      |      |    |       |       |   |     |       |       |         |        |             |        |
|   | Prima | Private in    | 6:13948 | HE  |                                               | ENST0 | ENSP00  |      |    |       |       |   |     |       |       |         |        |             |        |
| 1 | ry    | primary tumor | 8036    | CA  | headcase homolog (Drosophila)                 | 00003 | 0003566 | 296  | E/ | gAg/  | -     | 0 | 0.9 | 0.805 | 2.064 | high_im | 0.955  | medium_i    | -0.196 |
|   | tumor |               |         |     |                                               | 67658 | 30      |      | V  | gTg   |       |   | 55  |       |       | pact    |        | mpact       |        |
|   | Liver | Private in    |         | HN  |                                               | ENST0 | ENSP00  |      |    |       |       |   |     |       |       |         |        |             |        |
| 1 | metas | metastatic    | 5:13708 | RN  | heterogeneous nuclear ribonucleoprotein A0    | 00003 | 0003160 | 28   | E/ | gAg/  | -     | 0 | 0.3 | 2.265 | 2.056 | high_im | 0.093  | medium_i    | 1.215  |
|   | tases | tumor         | 9673    | PA0 |                                               |       |         |      | V  | gTg   |       |   | 82  |       |       | pact    |        | mpact       |        |
|   |       |               |         |     |                                               | 14940 | 42      |      |    |       |       |   |     |       |       |         |        |             | act    |
|   | Prima | Private in    | 15:7446 | ISL | immunoglobulin superfamily containing         | ENST0 | ENSP00  |      |    |       |       |   |     |       |       |         |        |             |        |
| 1 | ry    | primary tumor | 7345    | R   | leucine-rich repeat                           | 00002 | 0002498 | 49   | P/ | cCg/  | -     | 0 | 0.4 | 2.02  | 2.062 | high_im | 0.122  | medium_i    | 1.052  |
|   | tumor |               |         |     |                                               | 49842 | 42      |      | L  | cTg   |       |   | 16  |       |       | pact    |        | mpact       |        |
|   | Liver | Private in    |         | KC  |                                               | ENST0 | ENSP00  |      |    |       |       |   |     |       |       |         |        |             |        |
| 1 | metas | metastatic    | 2:26951 | NK3 | potassium channel, subfamily K, member 3      | 00005 | 0004440 | 267  | R/ | Cgc/  | -     | 0 | 1   | NA    | 2.511 | high_im | 2.082  | high_impact | NA     |
|   | tases | tumor         | 419     |     |                                               |       |         |      | C  | Tgc   |       |   |     |       |       | pact    |        | ct          |        |
|   |       |               |         |     |                                               | 38762 | 02      |      |    |       |       |   |     |       |       |         |        |             |        |
|   | Liver | Private in    | 16:8566 | KIA |                                               | ENST0 | ENSP00  |      |    |       |       |   |     |       |       |         |        |             |        |
| 1 | metas | metastatic    | 7696    | A01 | KIAA0182                                      | 00002 | 0002534 | 62   | A/ | Gcc/  | -     | 0 | 0   | 0.805 | 2.062 | high_im | -1.483 | low_impact  | -0.223 |
|   | tases | tumor         |         | 82  |                                               |       |         |      | T  | Acc   |       |   |     |       |       | pact    |        | ct          |        |
|   |       |               |         |     |                                               | 53458 | 58      |      |    |       |       |   |     |       |       |         |        |             |        |
|   | Prima | Private in    | 14:1046 | KIF |                                               | ENST0 | ENSP00  |      |    |       |       |   |     |       |       |         |        |             |        |
| 1 | ry    | primary tumor | 42127   | 26A | kinesin family member 26A                     | 00004 | 0003882 | 1001 | R/ | cGc/  | -     | 0 | 0.3 | 0.6   | 2.07  | high_im | 0.082  | medium_i    | -0.442 |
|   | tumor |               |         |     |                                               | 23312 | 41      |      | H  | cAc   |       |   | 53  |       |       | pact    |        | mpact       |        |
|   | Prima | Private in    | 22:5098 | KLH |                                               | ENST0 | ENSP00  |      |    |       |       |   |     |       |       |         |        |             |        |
| 1 | ry    | primary tumor | 7287    | DC7 | kelch domain containing 7B                    | 00003 | 0003790 | 231  | Q/ | cAg/  | rs577 | 0 | 0.0 | 1.95  | 2.062 | high_im | -0.621 | low_impact  | 0.978  |
|   | tumor |               |         | B   |                                               |       |         |      | R  | cGg   | 0886  |   | 33  |       |       | pact    |        | ct          |        |
|   |       |               |         |     |                                               | 95676 | 34      |      |    |       |       |   |     |       |       |         |        |             |        |
|   | Prima | Private in    | 12:1058 | KLR | killer cell lectin-like receptor subfamily C, | ENST0 | ENSP00  |      |    |       |       |   |     |       |       |         |        |             |        |
| 1 | ry    | primary tumor | 8530    | C2  | member 2                                      | 00003 | 0003713 | 19   | R/ | cGg/  | rs341 | 0 | 0.7 | 1.9   | 2.056 | high_im | 0.449  | medium_i    | 0.985  |
|   | tumor |               |         |     |                                               | 81901 | 26      |      | P  | cCg   | 95537 |   | 19  |       |       | pact    |        | mpact       |        |

|   |                  |                                         |             |        |                                                      |                |                 |     |      |          |             |   |       |       |       |                |        |               |       |               |
|---|------------------|-----------------------------------------|-------------|--------|------------------------------------------------------|----------------|-----------------|-----|------|----------|-------------|---|-------|-------|-------|----------------|--------|---------------|-------|---------------|
| 1 | Liver metastases | Private in metastatic tumor             | 1:47013464  | KN CN  | kinocilin                                            | ENST0000096314 | ENSP00000379607 | 82  | S/ P | Tcc/ Ccc | -           | 0 | 0.629 | NA    | 2.929 | high_impact    | 0.192  | medium_impact | NA    | NA            |
| 1 | Primary tumor    | Common in primary and metastatic tumors | 12:25398281 | KRA S  | v-Ki-ras2 Kirsten rat sarcoma viral oncogene homolog | ENST0000056078 | ENSP00000256078 | 13  | G/ D | gGc/ gAc | rs112445441 | 0 | 0.259 | 3.375 | 2.172 | high_impact    | -0.181 | low_impact    | 2.209 | medium_impact |
| 1 | Liver metastases | Common in primary and metastatic tumors | 12:25398281 | KRA S  | v-Ki-ras2 Kirsten rat sarcoma viral oncogene homolog | ENST0000056078 | ENSP00000256078 | 13  | G/ D | gGc/ gAc | rs112445441 | 0 | 0.259 | 3.375 | 2.172 | high_impact    | -0.181 | low_impact    | 2.209 | medium_impact |
| 1 | Liver metastases | Private in metastatic tumor             | 17:39505658 | KRT33A | keratin 33A                                          | ENST000007735  | ENSP00000007735 | 124 | N/ T | aA/a Ct  | -           | 0 | 0.999 | 3.685 | 0.795 | mediu_m_impact | 1.682  | high_impact   | 2.312 | medium_impact |
| 1 | Primary tumor    | Private in primary tumor                | 21:15516948 | LIPI   | lipase, member I                                     | ENST0000036861 | ENSP00000440381 | 431 | E/ K | Gaa/ Aaa | rs2822432   | 0 | 0.024 | NA    | 2.044 | high_impact    | -0.649 | low_impact    | NA    | NA            |
| 1 | Liver metastases | Private in metastatic tumor             | 15:74219546 | LOXL1  | lysyl oxidase-like 1                                 | ENST0000095162 | ENSP00000378591 | 3   | R/ L | cGg/ cTg | rs1048661   | 0 | 0.944 | NA    | 2.235 | high_impact    | 0.329  | medium_impact | NA    | NA            |
| 1 | Primary tumor    | Common in primary and metastatic tumors | 12:40657700 | LRRK2  | leucine-rich repeat kinase 2                         | ENST0000098910 | ENSP00000298910 | 551 | N/ K | aaC/ aaG | rs7308720   | 0 | 0.998 | 1.905 | 2.644 | high_impact    | 1.716  | high_impact   | 1.535 | medium_impact |
| 1 | Liver metastases | Common in primary and metastatic tumors | 12:40657700 | LRRK2  | leucine-rich repeat kinase 2                         | ENST0000098910 | ENSP00000298910 | 551 | N/ K | aaC/ aaG | rs7308720   | 0 | 0.998 | 1.905 | 2.644 | high_impact    | 1.716  | high_impact   | 1.535 | medium_impact |
| 1 | Liver            | Private in                              | 20:6033     | LRR    | leucine rich repeat neuronal 4                       | ENST0          | ENSP00          | 148 | L/   | Ctc/T    | rs611       | 0 | 0.9   | 3.685 | 2.062 | high_imp       | 1.031  | medium_i      | 2.798 | medium_imp    |



|   |       |               |         |     |                                                                            |       |         |      |    |       |       |    |     |       |       |          |        |             |        |               |
|---|-------|---------------|---------|-----|----------------------------------------------------------------------------|-------|---------|------|----|-------|-------|----|-----|-------|-------|----------|--------|-------------|--------|---------------|
|   | metas | metastatic    | 004     | N4  |                                                                            | 00003 | 0003681 |      | F  | tc    | 7050  | 67 |     |       | pact  |          | mpact  |             | act    |               |
|   | tases | tumor         |         |     |                                                                            | 78858 | 35      |      |    |       |       |    |     |       |       |          |        |             |        |               |
| 1 | Prima | Common in     |         | MA  |                                                                            | ENST0 | ENSP00  |      |    |       |       |    |     |       |       |          |        |             |        |               |
|   | ry    | primary and   | X:14099 | GE  | melanoma antigen family C, 1                                               | 00002 | 0002858 | 406  | S/ | tCt/t | rs626 | 0  | 0   | 0     | 2.062 | high_im  | -1.483 | low_impact  | -1.067 | low_impact    |
|   | tumor | metastatic    | 4407    | C1  |                                                                            | 85879 | 79      |      | C  | Gt    | 11965 |    |     |       |       | pact     |        |             |        |               |
|   |       | tumors        |         |     |                                                                            |       |         |      |    |       |       |    |     |       |       |          |        |             |        |               |
| 1 | Liver | Common in     |         | MA  |                                                                            | ENST0 | ENSP00  |      |    |       |       |    |     |       |       |          |        |             |        |               |
|   | metas | primary and   | X:14099 | GE  | melanoma antigen family C, 1                                               | 00002 | 0002858 | 406  | S/ | tCt/t | rs626 | 0  | 0   | 0     | 2.062 | high_im  | -1.483 | low_impact  | -1.067 | low_impact    |
|   | tases | metastatic    | 4407    | C1  |                                                                            | 85879 | 79      |      | C  | Gt    | 11965 |    |     |       |       | pact     |        |             |        |               |
|   |       | tumors        |         |     |                                                                            |       |         |      |    |       |       |    |     |       |       |          |        |             |        |               |
| 1 | Liver | Private in    | 15:9484 | MC  | multiple C2 domains, transmembrane 2                                       | ENST0 | ENSP00  |      |    |       |       |    |     |       |       |          |        |             |        |               |
|   | metas | metastatic    | 1691    | TP2 |                                                                            | 00004 | 0003888 | 66   | R/ | cGg/  | rs617 | 0  | 0.8 | NA    | 2.075 | high_im  | 0.59   | medium_i    | NA     | NA            |
|   | tases | tumor         |         |     |                                                                            | 56504 | 87      |      | Q  | cAg   | 37195 |    | 49  |       |       | pact     |        | mpact       |        |               |
|   |       |               |         |     |                                                                            |       |         |      |    |       |       | 0  |     |       |       |          |        |             |        |               |
| 1 | Prima | Private in    | 1:15644 | ME  | myocyte enhancer factor 2D                                                 | ENST0 | ENSP00  |      |    |       |       |    |     |       |       |          |        |             |        |               |
|   | ry    | primary tumor | 6909    | F2D |                                                                            | 00003 | 0003447 | 204  | K/ | aaG/  | -     | .  | 0.9 | NA    | 1.127 | mediu    | 1.585  | high_impact | NA     | NA            |
|   | tumor |               |         |     |                                                                            | 53795 | 05      |      | N  | aaC   |       | 0  | 96  |       |       | m_impact |        | act         |        |               |
|   |       |               |         |     |                                                                            |       |         |      |    |       |       | 1  |     |       |       |          |        |             |        |               |
| 1 | Prima | Private in    | 1:34112 | ME  | multiple EGF-like-domains 6                                                | ENST0 | ENSP00  |      |    |       |       |    |     |       |       |          |        |             |        |               |
|   | ry    | primary tumor | 01      | GF6 |                                                                            | 00003 | 0003489 | 1326 | W/ | Tgg/  | -     | 0  | 0.9 | 3.005 | 2.075 | high_im  | 1.838  | high_impact | 1.983  | medium_impact |
|   | tumor |               |         |     |                                                                            | 56575 | 82      |      | R  | Agg   |       |    | 99  |       |       | pact     |        | act         |        |               |
| 1 | Liver | Private in    | 22:4085 | MKL | megakaryoblastic leukemia (translocation) 1                                | ENST0 | ENSP00  |      |    |       |       |    |     |       |       |          |        |             |        |               |
|   | metas | metastatic    | 9263    | 1   |                                                                            | 00004 | 0003984 | 17   | R/ | cGg/  | -     | 0  | 1   | NA    | 2.175 | high_im  | 2.245  | high_impact | NA     | NA            |
|   | tases | tumor         |         |     |                                                                            | 22851 | 78      |      | Q  | cAg   |       |    |     |       |       | pact     |        | act         |        |               |
| 1 | Liver | Private in    | 17:3686 | MLL | myeloid/lymphoid or mixed-lineage leukemia (trithorax homolog, Drosophila) | ENST0 | ENSP00  |      |    |       |       |    |     |       |       |          |        |             |        |               |
|   | metas | metastatic    | 8963    | T6  |                                                                            | 00003 | 0003164 | 247  | R/ | cGc/  | -     | 0  | 0   | 1.845 | 2.069 | high_im  | -1.491 | low_impact  | 0.815  | low_impact    |
|   | tases | tumor         |         |     |                                                                            | 25718 | 26      |      | H  | cAc   |       |    |     |       |       | pact     |        | act         |        |               |
| 1 | Prima | Common in     |         | MT  |                                                                            | ENST0 | ENSP00  |      |    |       |       |    |     |       |       |          |        |             |        |               |
|   | ry    | primary and   | 2:24203 | ERF | MTERF domain containing 2                                                  | 00004 | 0003849 | 1    | M/ | aTg/  | rs228 | 0  | 0.7 | NA    | 2.929 | high_im  | 0.282  | medium_i    | NA     | NA            |
|   | tumor | metastatic    | 6797    | D2  |                                                                            | 06593 | 98      |      | T  | aCg   | 6323  |    | 08  |       |       | pact     |        | mpact       |        |               |
|   |       | tumors        |         |     |                                                                            |       |         |      |    |       |       |    |     |       |       |          |        |             |        |               |

|   |                  |                                         |                 |                 |                                                     |                         |                         |      |         |             |                |         |           |      |       |               |        |               |        |               |
|---|------------------|-----------------------------------------|-----------------|-----------------|-----------------------------------------------------|-------------------------|-------------------------|------|---------|-------------|----------------|---------|-----------|------|-------|---------------|--------|---------------|--------|---------------|
| 1 | Liver metastases | Common in primary and metastatic tumors | 2:24203<br>6797 | MT<br>ERF<br>D2 | MTERF domain containing 2                           | ENST0<br>00004<br>06593 | ENSP00<br>0003849<br>98 | 1    | M/<br>T | aTg/<br>aCg | rs228<br>6323  | 0<br>08 | 0.7<br>08 | NA   | 2.929 | high_impact   | 0.282  | medium_impact | NA     | NA            |
| 1 | Primary tumor    | Private in primary tumor                | 12:1058<br>8530 | NA<br>NA        |                                                     | ENST0<br>00005<br>39033 | ENSP00<br>0004375<br>63 | 19   | R/<br>P | cGg/<br>cCg | rs341<br>95537 | 0<br>88 | 0.9<br>88 | NA   | 2.117 | high_impact   | 1.27   | medium_impact | NA     | NA            |
| 1 | Liver metastases | Private in metastatic tumor             | 17:1551<br>7237 | NA<br>NA        |                                                     | ENST0<br>00004<br>55584 | ENSP00<br>0004026<br>44 | 586  | L/<br>V | Ctg/<br>Gtg | rs620<br>70406 | 0<br>0  | 0<br>0    | NA   | 2.064 | high_impact   | -1.516 | low_impact    | NA     | NA            |
| 1 | Primary tumor    | Common in primary and metastatic tumors | 1:20177<br>7250 | NAV<br>1        | neuron navigator 1                                  | ENST0<br>00003<br>67295 | ENSP00<br>0003562<br>64 | 879  | S/<br>L | tCg/t<br>Tg | rs282<br>0289  | .<br>0  | 0.9<br>96 | NA   | 0.83  | medium_impact | 1.5    | high_impact   | NA     | NA            |
| 1 | Liver metastases | Common in primary and metastatic tumors | 1:20177<br>7250 | NAV<br>1        | neuron navigator 1                                  | ENST0<br>00003<br>67295 | ENSP00<br>0003562<br>64 | 879  | S/<br>L | tCg/t<br>Tg | rs282<br>0289  | .<br>0  | 0.9<br>96 | NA   | 0.83  | medium_impact | 1.5    | high_impact   | NA     | NA            |
| 1 | Liver metastases | Private in metastatic tumor             | 3:47038<br>034  | NBE<br>AL2      | neurobeachin-like 2                                 | ENST0<br>00004<br>50053 | ENSP00<br>0004150<br>34 | 809  | F/<br>V | Ttt/G<br>tt | -<br>-         | 0<br>0  | 0.9<br>2  | 2.16 | 2.117 | high_impact   | 0.794  | medium_impact | 1.075  | medium_impact |
| 1 | Primary tumor    | Private in primary tumor                | 19:5656<br>9629 | NLR<br>P5       | NLR family, pyrin domain containing 5               | ENST0<br>00003<br>90649 | ENSP00<br>0003750<br>63 | 1108 | S/<br>C | tCt/t<br>Gt | rs124<br>62795 | .<br>0  | 0.9<br>98 | 3.17 | 0.55  | medium_impact | 1.666  | high_impact   | 1.881  | medium_impact |
| 1 | Liver metastases | Private in metastatic tumor             | 12:5761<br>9160 | NXP<br>H4       | neurexophilin 4                                     | ENST0<br>00003<br>49394 | ENSP00<br>0003335<br>93 | 186  | L/<br>R | cTt/c<br>Gt | -<br>-         | 0<br>0  | 0.7<br>88 | 0    | 2.064 | high_impact   | 0.523  | medium_impact | -1.036 | low_impact    |
| 1 | Liver metastases | Private in metastatic                   | 1:24811<br>2809 | OR2<br>L8       | olfactory receptor, family 2, subfamily L, member 8 | ENST0<br>00003          | ENSP00<br>0003497       | 217  | Y/<br>C | tAt/t<br>Gt | rs715<br>35243 | 0<br>0  | 1<br>1    | 3.76 | 1.67  | medium_impact | 1.724  | high_impact   | 1.471  | medium_impact |





|   |                 |                                        |                 |             |                                                                                   |           |              |      |         |             |               |   |     |       |       |                |        |               |        |               |
|---|-----------------|----------------------------------------|-----------------|-------------|-----------------------------------------------------------------------------------|-----------|--------------|------|---------|-------------|---------------|---|-----|-------|-------|----------------|--------|---------------|--------|---------------|
|   | tumor           |                                        |                 |             |                                                                                   | 32519     | 26           |      |         |             |               |   |     |       |       |                |        |               |        |               |
| 1 | Liver metasases | Private in metastatic tumor            | 8:14555<br>6990 | SC<br>RT1   | scratch homolog 1, zinc finger protein (Drosophila)                               | ENST00003 | ENSP00003316 | 302  | K/<br>E | Aag/<br>Gag | -             | 0 | 0   | 1.7   | 2.066 | high_impact    | -1.495 | low_impact    | 0.752  | low_impact    |
|   |                 |                                        |                 |             |                                                                                   | 32135     | 92           |      |         |             |               |   |     |       |       |                |        |               |        |               |
| 1 | Liver metasases | Private in metastatic tumor            | 19:1506<br>7421 | SLC<br>1A6  | solute carrier family 1 (high affinity aspartate/glutamate transporter), member 6 | ENST00004 | ENSP00004093 | 282  | V/I     | Gtc/<br>Atc | -             | . | 0.6 | NA    | 0.386 | mediu_m_impact | 0.334  | medium_impact | NA     | NA            |
|   |                 |                                        |                 |             |                                                                                   | 30939     | 86           |      |         |             |               | 0 | 99  |       |       |                |        |               |        |               |
| 1 | Primary tumor   | Private in primary tumor               | 11:9293<br>0991 | SLC<br>36A4 | solute carrier family 36 (proton/amino acid symporter), member 4                  | ENST00003 | ENSP00003173 | 3    | A/<br>V | gCg/<br>gTg | -             | 0 | 0   | 0     | 2.124 | high_impact    | -1.345 | low_impact    | -1.086 | low_impact    |
| 1 | Primary tumor   | Private in primary tumor               | 2:23103<br>6796 | SP1<br>10   | SP110 nuclear body protein                                                        | ENST00003 | ENSP00003514 | 601  | P/<br>S | Cct/<br>ct  | -             | 0 | 0.7 | 2.485 | 2.119 | high_impact    | 0.424  | medium_impact | 1.276  | medium_impact |
|   |                 |                                        |                 |             |                                                                                   | 58662     | 88           |      |         |             |               |   |     |       |       |                |        |               |        |               |
| 1 | Primary tumor   | Private in primary tumor               | 7:99917<br>252  | SPD<br>YE3  | speedy homolog E3 (Xenopus laevis)                                                | ENST00004 | ENSP00004011 | 94   | Y/<br>D | Tac/<br>Gac | -             | 0 | 0.9 | NA    | 2.929 | high_impact    | 1.44   | medium_impact | NA     | NA            |
|   |                 |                                        |                 |             |                                                                                   | 37326     | 47           |      |         |             |               |   |     |       |       |                |        |               |        |               |
| 1 | Primary tumor   | Private in primary tumor               | X:15305<br>0572 | SRP<br>K3   | SRSF protein kinase 3                                                             | ENST00004 | ENSP00004200 | 555  | I/T     | aTc/<br>aCc | -             | 0 | 0.0 | NA    | 2.032 | high_impact    | -0.323 | low_impact    | NA     | NA            |
|   |                 |                                        |                 |             |                                                                                   | 89426     | 58           |      |         |             |               |   |     |       |       |                |        |               |        |               |
| 1 | Primary tumor   | Private in primary tumor               | 2:10887<br>5198 | SUL<br>T1C3 | sulfotransferase family, cytosolic, 1C, member 3                                  | ENST00003 | ENSP00003658 | 179  | G/<br>R | Ggg/<br>Agg | rs221<br>9078 | 0 | 1   | NA    | 1.877 | mediu_m_impact | 2.028  | high_impact   | NA     | NA            |
|   |                 |                                        |                 |             |                                                                                   | 76700     | 90           |      |         |             |               |   |     |       |       |                |        |               |        |               |
| 1 | Liver metasases | Private in metastatic tumor            | 9:11317<br>3777 | SVE<br>P1   | sushi, von Willebrand factor type A, EGF and pentraxin domain containing 1        | ENST00003 | ENSP00003635 | 2049 | G/<br>C | Ggt/<br>Tgt | -             | . | 1   | NA    | 0.145 | mediu_m_impact | 1.992  | high_impact   | NA     | NA            |
|   |                 |                                        |                 |             |                                                                                   | 74469     | 93           |      |         |             |               |   |     |       |       |                |        |               |        |               |
| 1 | Primary tumor   | Common in primary and metastatic tumor | 3:10003<br>9736 | TBC<br>1D23 | TBC1 domain family, member 23                                                     | ENST00003 | ENSP00003777 | 647  | K/<br>Q | Aaa/<br>Caa | -             | . | 0.9 | 2.175 | 0.941 | mediu_m_impact | 1.765  | high_impact   | 1.235  | medium_impact |
|   |                 |                                        |                 |             |                                                                                   | 94144     | 00           |      |         |             |               |   |     |       |       |                |        |               |        |               |





|   |                         |                                                  |                 |                 |                                           |                         |                         |     |             |             |               |             |           |        |         |                       |          |                 |        |                   |
|---|-------------------------|--------------------------------------------------|-----------------|-----------------|-------------------------------------------|-------------------------|-------------------------|-----|-------------|-------------|---------------|-------------|-----------|--------|---------|-----------------------|----------|-----------------|--------|-------------------|
| 1 | Prima<br>ry<br>tumor    | Common in<br>primary and<br>metastatic<br>tumors | 18:7462<br>5778 | ZNF<br>236      | zinc finger protein 236                   | ENST0<br>00005<br>43926 | ENSP00<br>0004445<br>24 | 993 | K/<br>N     | aaG/<br>aaT | -             | 0           | 0.9<br>98 | NA     | 2.066   | high_im<br>pact       | 1.786    | high_imp<br>act | NA     | NA                |
| 1 | Liver<br>metas<br>tases | Common in<br>primary and<br>metastatic<br>tumors | 18:7462<br>5778 | ZNF<br>236      | zinc finger protein 236                   | ENST0<br>00002<br>53159 | ENSP00<br>0002531<br>59 | 993 | K/<br>N     | aaG/<br>aaT | -             | 0           | 0.9<br>98 | 2.21   | 2.066   | high_im<br>pact       | 1.786    | high_imp<br>act | 1.299  | medium_imp<br>act |
| 1 | Liver<br>metas<br>tases | Private in<br>metastatic<br>tumor                | 15:5697<br>4464 | ZNF<br>280<br>D | zinc finger protein 280D                  | ENST0<br>00002<br>60435 | ENSP00<br>0002604<br>35 | 167 | K/<br>R     | aAa/<br>aGa | -             | 0<br>4      | 0.9<br>99 | NA     | 0.574   | mediu<br>m_imp<br>act | 2.005    | high_imp<br>act | NA     | NA                |
| 1 | Prima<br>ry<br>tumor    | Private in<br>primary tumor                      | 19:5843<br>8584 | ZNF<br>418      | zinc finger protein 418                   | ENST0<br>00003<br>96147 | ENSP00<br>0003794<br>51 | 322 | S/<br>C     | tCt/t<br>Gt | -             | 0<br>1      | 0.9<br>99 | 0.6    | 1.164   | mediu<br>m_imp<br>act | 1.992    | high_imp<br>act | -0.429 | low_impact        |
| 1 | Prima<br>ry<br>tumor    | Private in<br>primary tumor                      | 5:12148<br>8203 | ZNF<br>474      | zinc finger protein 474                   | ENST0<br>00002<br>96600 | ENSP00<br>0002966<br>00 | 173 | R/<br>H     | cGc/<br>cAc | rs256<br>0306 | 0           | 1         | 2.825  | 2.069   | high_im<br>pact       | 1.946    | high_imp<br>act | 1.793  | medium_imp<br>act |
| 1 | Liver<br>metas<br>tases | Private in<br>metastatic<br>tumor                | 19:2080<br>7298 | ZNF<br>626      | zinc finger protein 626                   | ENST0<br>00004<br>53075 | ENSP00<br>0003908<br>83 | 386 | F/<br>S     | tTt/tC<br>t | -             | 0           | 0.9<br>99 | NA     | 2.056   | high_im<br>pact       | 1.933    | high_imp<br>act | NA     | NA                |
| 1 | Liver<br>metas<br>tases | Private in<br>metastatic<br>tumor                | 19:2411<br>5442 | ZNF<br>726      | zinc finger protein 726                   | ENST0<br>00003<br>22487 | ENSP00<br>0003171<br>25 | 175 | C/<br>Y     | tGt/t<br>At | -             | 0<br>1<br>3 | 0.9<br>98 | [sent] | 0.092   | mediu<br>m_imp<br>act | 1.818    | high_imp<br>act | NA     | NA                |
| 1 | Prima<br>ry<br>tumor    | Private in<br>primary tumor                      | 15:4365<br>3780 | ZSC<br>AN2<br>9 | zinc finger and SCAN domain containing 29 | ENST0<br>00003<br>96976 | ENSP00<br>0003801<br>74 | 684 | G/<br>R     | Ggg/<br>Agg | -             | 0           | 0.9<br>98 | 2.83   | 2.066   | high_im<br>pact       | 1.786    | high_imp<br>act | 1.965  | medium_imp<br>act |
| 2 | Prima                   | Private in                                       | 20:3652         | ADA             | ADAM metallopeptidase domain 33           | ENST0                   | ENSP00                  | 530 | W/<br>tGg/t | -           | 0             | 1           | NA        | 2.174  | high_im | 1.85                  | high_imp | NA              | NA     |                   |



|   |       |               |         |     |                                               |       |         |     |    |       |       |     |     |       |       |         |        |          |        |            |
|---|-------|---------------|---------|-----|-----------------------------------------------|-------|---------|-----|----|-------|-------|-----|-----|-------|-------|---------|--------|----------|--------|------------|
|   | ry    | primary tumor | 789     | M33 |                                               | 00003 | 0003691 |     | S  | Cg    |       |     |     |       |       | pact    |        | ct       |        |            |
|   |       | tumor         |         |     |                                               | 79861 | 90      |     |    |       |       |     |     |       |       |         |        |          |        |            |
| 2 | Prima | Common in     |         |     |                                               | ENST0 | ENSP00  |     |    |       | rs117 |     |     |       |       |         |        |          |        |            |
|   | ry    | primary and   | 15:8682 | AG  |                                               | 00004 | 0004130 | 694 | Y/ | tAt/t | 18481 | 0   | 1   | NA    | 2.067 | high_im | 1.777  | high_imp | NA     | NA         |
|   | tumor | metastatic    | 2926    | BL1 | ATP/GTP binding protein-like 1                | 41037 | 01      |     | C  | Gt    | 7     |     |     |       |       | pact    |        | ct       |        |            |
|   |       | tumors        |         |     |                                               |       |         |     |    |       |       |     |     |       |       |         |        |          |        |            |
| 2 | Liver | Common in     |         |     |                                               | ENST0 | ENSP00  |     |    |       | rs117 |     |     |       |       |         |        |          |        |            |
|   | metas | primary and   | 15:8682 | AG  |                                               | 00003 | 0003739 | 396 | Y/ | tAt/t | 18481 | 0   | 0.9 | NA    | 2.067 | high_im | 1.399  | medium_i | NA     | NA         |
|   | tases | metastatic    | 2926    | BL1 | ATP/GTP binding protein-like 1                | 89298 | 49      |     | C  | Gt    | 7     |     | 95  |       |       | pact    |        | mpact    |        |            |
|   |       | tumors        |         |     |                                               |       |         |     |    |       |       |     |     |       |       |         |        |          |        |            |
| 2 | Liver | Private in    |         |     |                                               | ENST0 | ENSP00  |     |    |       |       | 0   |     |       |       |         |        |          |        |            |
|   | metas | metastatic    | 11:6725 | AIP | aryl hydrocarbon receptor interacting protein | 00002 | 0002791 | 113 | D/ | gaC/  | -     | 0.9 |     | 1.565 | -0.24 | low_im  | 1.734  | high_imp | 0.611  | low_impact |
|   | tases | tumor         | 6797    |     |                                               | 79146 | 46      |     | E  | gaG   | -     | 1   | 98  |       | 2     | pact    |        | ct       |        |            |
|   |       |               |         |     |                                               |       |         |     |    |       |       | 5   |     |       |       |         |        |          |        |            |
| 2 | Liver | Private in    |         |     |                                               | ENST0 | ENSP00  |     |    |       |       |     |     |       |       |         |        |          |        |            |
|   | metas | metastatic    | 1:10416 | AM  | amylase, alpha 2A (pancreatic)                | 00003 | 0003775 | 387 | I/ | atT/a | -     | 0   | 0.0 | 2.465 | 2.225 | high_im | -0.357 | low_imp  | 1.046  | medium_imp |
|   | tases | tumor         | 6547    | Y2A |                                               | 93932 | 09      |     | M  | tG    | -     | 0   | 91  |       |       | pact    |        | ct       |        | act        |
|   |       |               |         |     |                                               |       |         |     |    |       |       |     |     |       |       |         |        |          |        |            |
| 2 | Liver | Private in    |         |     |                                               | ENST0 | ENSP00  |     |    |       |       |     |     |       |       |         |        |          |        |            |
|   | metas | metastatic    | 1:14310 | ATA | ATPase family, AAA domain containing 3B       | 00003 | 0003117 | 604 | Y/ | Tac/  | rs979 | 0   | 0   | 0     | 2.101 | high_im | -1.431 | low_imp  | -1.067 | low_impact |
|   | tases | tumor         | 60      | D3B |                                               | 08647 | 66      |     | H  | Cac   | 2997  |     |     |       |       | pact    |        | ct       |        |            |
|   |       |               |         |     |                                               |       |         |     |    |       |       |     |     |       |       |         |        |          |        |            |
| 2 | Prima | Common in     |         |     |                                               | ENST0 | ENSP00  |     |    |       |       | 0   |     |       |       |         |        |          |        |            |
|   | ry    | primary and   | 1:19314 | B3G | UDP-Gal:betaGlcNAc beta                       | 00003 | 0003564 | 307 | R/ | Cgt/T | -     | 0.9 |     | 2.715 | 0.745 | mediu   | 2.106  | high_imp | 1.502  | medium_imp |
|   | tumor | metastatic    | 9774    | ALT | 1,3-galactosyltransferase, polypeptide 2      | 67434 | 04      |     | C  | gt    | -     | 0   | 98  |       |       | m_imp   | 2.106  | high_imp | 1.502  | medium_imp |
|   |       | tumors        |         | 2   |                                               |       |         |     |    |       |       | 4   |     |       |       | act     |        | ct       |        | act        |
|   |       |               |         |     |                                               |       |         |     |    |       |       |     |     |       |       |         |        |          |        |            |
| 2 | Liver | Common in     |         |     |                                               | ENST0 | ENSP00  |     |    |       |       | 0   |     |       |       |         |        |          |        |            |
|   | metas | primary and   | 1:19314 | B3G | UDP-Gal:betaGlcNAc beta                       | 00003 | 0003564 | 307 | R/ | Cgt/T | -     | 0.9 |     | 2.715 | 0.745 | mediu   | 2.106  | high_imp | 1.502  | medium_imp |
|   | tases | metastatic    | 9774    | ALT | 1,3-galactosyltransferase, polypeptide 2      | 67434 | 04      |     | C  | gt    | -     | 0   | 98  |       |       | m_imp   | 2.106  | high_imp | 1.502  | medium_imp |
|   |       | tumors        |         | 2   |                                               |       |         |     |    |       |       | 4   |     |       |       | act     |        | ct       |        | act        |
|   |       |               |         |     |                                               |       |         |     |    |       |       |     |     |       |       |         |        |          |        |            |
| 2 | Prima | Private in    |         |     |                                               | ENST0 | ENSP00  |     |    |       |       |     |     |       |       |         |        |          |        |            |
|   | ry    | primary tumor | 17:1174 | BHL | basic helix-loop-helix family, member a9      | 00003 | 0003752 | 202 | G/ | Ggg/  | -     | 0   | 0.3 | 0.55  | 2.056 | high_im | 0.014  | medium_i | -0.51  | low_impact |
|   |       |               | 461     | HA9 |                                               |       |         |     | R  | Cgg   | -     | 0   | 26  |       |       | pact    |        | mpact    |        |            |

|   |       |                        |         |      |                                                     |        |         |     |    |      |       |   |     |       |       |         |        |             |        |               |
|---|-------|------------------------|---------|------|-----------------------------------------------------|--------|---------|-----|----|------|-------|---|-----|-------|-------|---------|--------|-------------|--------|---------------|
|   | tumor |                        |         |      | 91429                                               | 48     |         |     |    |      |       |   |     |       |       |         |        |             |        |               |
|   | Liver | Private in             | 11:3356 | C11  | ENST0                                               | ENSP00 |         |     |    |      |       |   |     |       |       |         |        |             |        |               |
| 2 | metas | metastatic             | 6521    | orf4 | chromosome 11 open reading frame 41                 | 00005  | 0004334 | 95  | K/ | aaG/ | -     | 0 | 0.0 | NA    | 2.929 | high_im | -1.065 | low_impact  | NA     | NA            |
|   | tases | tumor                  |         | 1    |                                                     | 26400  | 81      |     | N  | aaT  |       |   |     |       |       |         |        |             |        |               |
|   | Prima | Private in             | 17:3683 | C17  | ENST0                                               | ENSP00 |         |     |    |      |       |   |     |       |       |         |        |             |        |               |
| 2 | ry    | primary tumor          | 0562    | orf9 | chromosome 17 open reading frame 96                 | 00003  | 0003179 | 63  | L/ | Ctg/ | rs796 | 0 | 0.9 | 0.695 | 2.929 | high_im | 0.612  | medium_i    | -0.227 | low_impact    |
|   | tumor |                        |         | 6    |                                                     | 25814  | 05      |     | V  | Gtg  | 76758 |   |     |       |       |         |        |             |        |               |
|   | Liver | Private in             | 17:7704 | C1Q  | ENST0                                               | ENSP00 |         |     |    |      |       |   |     |       |       |         |        |             |        |               |
| 2 | metas | metastatic             | 4085    | TNF  | C1q and tumor necrosis factor related protein 1     | 00003  | 0003762 | 254 | E/ | gAa/ | -     | . | 0.9 | 1.45  | -0.39 | low_im  | 1.625  | high_impact | 0.454  | low_impact    |
|   | tases | tumor                  |         | 1    |                                                     | 92444  | 39      |     | G  | gGa  |       |   |     |       |       |         |        |             |        |               |
|   | Liver | Private in             | 7:89938 | C7o  | ENST0                                               | ENSP00 |         |     |    |      |       |   |     |       |       |         |        |             |        |               |
| 2 | metas | metastatic             | 680     | rf63 | chromosome 7 open reading frame 63                  | 00004  | 0004158 | 114 | T/ | aCg/ | rs113 | 0 | 0.9 | NA    | 2.117 | high_im | 1.314  | medium_i    | NA     | NA            |
|   | tases | tumor                  |         |      |                                                     | 12839  | 18      |     | M  | aTg  | 4956  |   |     |       |       |         |        |             |        |               |
|   | Prima | Common in              | 9:97535 | C9o  | ENST0                                               | ENSP00 |         |     |    |      |       |   |     |       |       |         |        |             |        |               |
| 2 | ry    | primary and metastatic | 322     | rf3  | chromosome 9 open reading frame 3                   | 00004  | 0004021 | 102 | R/ | aGg/ | -     | 0 | 0   | NA    | 2.306 | high_im | -1.494 | low_impact  | NA     | NA            |
|   | tumor | tumors                 |         |      |                                                     | 24143  | 71      |     | M  | aTg  |       |   |     |       |       |         |        |             |        |               |
|   | Liver | Common in              | 9:97535 | C9o  | ENST0                                               | ENSP00 |         |     |    |      |       |   |     |       |       |         |        |             |        |               |
| 2 | metas | primary and metastatic | 322     | rf3  | chromosome 9 open reading frame 3                   | 00004  | 0004018 | 61  | R/ | aGg/ | -     | 0 | 1   | NA    | 2.306 | high_im | 1.991  | high_impact | NA     | NA            |
|   | tases | tumors                 |         |      |                                                     | 28313  | 54      |     | M  | aTg  |       |   |     |       |       |         |        |             |        |               |
|   | Prima | Common in              | 17:6505 | CA   | ENST0                                               | ENSP00 |         |     |    |      |       |   |     |       |       |         |        |             |        |               |
| 2 | ry    | primary and metastatic | 2304    | CN   | calcium channel, voltage-dependent, gamma subunit 1 | 00002  | 0002260 | 196 | G/ | Ggt/ | rs179 | . | 0.9 | 2.665 | 0.881 | mediu   | 1.834  | high_impact | 2.232  | medium_impact |
|   | tumor | tumors                 |         | G1   |                                                     | 26021  | 21      |     | S  | Agt  | 9938  |   |     |       |       |         |        |             |        |               |
|   | Liver | Common in              | 17:6505 | CA   | ENST0                                               | ENSP00 |         |     |    |      |       |   |     |       |       |         |        |             |        |               |
| 2 | metas | primary and metastatic | 2304    | CN   | calcium channel, voltage-dependent, gamma subunit 1 | 00002  | 0002260 | 196 | G/ | Ggt/ | rs179 | . | 0.9 | 2.665 | 0.881 | mediu   | 1.834  | high_impact | 2.232  | medium_impact |
|   | tases | tumors                 |         | G1   |                                                     | 26021  | 21      |     | S  | Agt  | 9938  |   |     |       |       |         |        |             |        |               |

|   |                         |                                                  |                 |                 |                                                 |                         |                         |     |         |             |                |         |           |       |            |                       |        |                   |        |                   |
|---|-------------------------|--------------------------------------------------|-----------------|-----------------|-------------------------------------------------|-------------------------|-------------------------|-----|---------|-------------|----------------|---------|-----------|-------|------------|-----------------------|--------|-------------------|--------|-------------------|
| 2 | Prima<br>ry<br>tumor    | Private in<br>primary tumor                      | 1:18482<br>31   | CAL<br>ML6      | calmodulin-like 6                               | ENST0<br>00003<br>78604 | ENSP00<br>0003678<br>67 | 81  | M/<br>I | atG/a<br>tA | -<br>-         | 0<br>0  | 0.1<br>23 | NA    | 2.075      | high_im<br>pact       | -0.3   | low_imp<br>act    | NA     | NA                |
| 2 | Prima<br>ry<br>tumor    | Common in<br>primary and<br>metastatic<br>tumors | 22:3790<br>6262 | CA<br>RD1<br>0  | caspase recruitment domain family, member<br>10 | ENST0<br>00002<br>51973 | ENSP00<br>0002519<br>73 | 289 | R/<br>Q | cGg/<br>cAg | rs961<br>0775  | .<br>2  | 0.9<br>92 | 1.87  | -0.32<br>5 | low_im<br>pact        | 1.585  | high_imp<br>act   | 1.054  | medium_imp<br>act |
| 2 | Liver<br>metas<br>tases | Common in<br>primary and<br>metastatic<br>tumors | 22:3790<br>6262 | CA<br>RD1<br>0  | caspase recruitment domain family, member<br>10 | ENST0<br>00002<br>51973 | ENSP00<br>0002519<br>73 | 289 | R/<br>Q | cGg/<br>cAg | rs961<br>0775  | .<br>2  | 0.9<br>92 | 1.87  | -0.32<br>5 | low_im<br>pact        | 1.585  | high_imp<br>act   | 1.054  | medium_imp<br>act |
| 2 | Prima<br>ry<br>tumor    | Common in<br>primary and<br>metastatic<br>tumors | 17:7817<br>8893 | CA<br>RD1<br>4  | caspase recruitment domain family, member<br>14 | ENST0<br>00003<br>44227 | ENSP00<br>0003445<br>49 | 820 | R/<br>W | Cgg/<br>Tgg | rs116<br>52075 | 0<br>75 | 0.1<br>75 | 1.04  | 2.054      | high_im<br>pact       | -0.316 | low_imp<br>act    | -0.033 | low_impact        |
| 2 | Liver<br>metas<br>tases | Common in<br>primary and<br>metastatic<br>tumors | 17:7817<br>8893 | CA<br>RD1<br>4  | caspase recruitment domain family, member<br>14 | ENST0<br>00003<br>44227 | ENSP00<br>0003445<br>49 | 820 | R/<br>W | Cgg/<br>Tgg | rs116<br>52075 | 0<br>75 | 0.1<br>75 | 1.04  | 2.054      | high_im<br>pact       | -0.316 | low_imp<br>act    | -0.033 | low_impact        |
| 2 | Prima<br>ry<br>tumor    | Private in<br>primary tumor                      | 10:7050<br>7311 | CC<br>AR1       | cell division cycle and apoptosis regulator 1   | ENST0<br>00005<br>40807 | ENSP00<br>0004456<br>07 | 77  | P/<br>S | Cct/T<br>ct | -<br>-         | 0<br>0  | 0         | NA    | 2.084      | high_im<br>pact       | -1.484 | low_imp<br>act    | NA     | NA                |
| 2 | Prima<br>ry<br>tumor    | Private in<br>primary tumor                      | 19:1512<br>1684 | CC<br>DC1<br>05 | coiled-coil domain containing 105               | ENST0<br>00002<br>92574 | ENSP00<br>0002925<br>74 | 16  | V/<br>G | gTt/g<br>Gt | -<br>-         | 0<br>88 | 0.7<br>88 | 0.975 | 2.929      | high_im<br>pact       | 0.388  | medium_i<br>mpact | 0.08   | low_impact        |
| 2 | Prima<br>ry<br>tumor    | Common in<br>primary and<br>metastatic<br>tumors | 1:15815<br>1897 | CD1<br>D        | CD1d molecule                                   | ENST0<br>00003<br>68171 | ENSP00<br>0003571<br>53 | 135 | A/<br>E | gCa/<br>gAa | -<br>-         | 0<br>92 | 0.9<br>92 | 3.105 | 1.972      | mediu<br>m_imp<br>act | 1.558  | high_imp<br>act   | 2.175  | medium_imp<br>act |
| 2 | Liver                   | Common in                                        | 1:15815         | CD1             | CD1d molecule                                   | ENST0                   | ENSP00                  | 135 | A/      | gCa/        | -              | 0       | 0.9       | 3.105 | 1.972      | mediu                 | 1.558  | high_imp          | 2.175  | medium_imp        |

|   |                  |                               |         |     |                                                  |       |         |      |    |       |       |    |     |      |       |             |        |               |        |               |
|---|------------------|-------------------------------|---------|-----|--------------------------------------------------|-------|---------|------|----|-------|-------|----|-----|------|-------|-------------|--------|---------------|--------|---------------|
|   | metastases       | primary and metastatic tumors | 1897    | D   |                                                  | 00003 | 0003571 |      | E  | gAa   |       |    | 92  |      |       | m_imp       |        | ct            |        | act           |
|   |                  |                               |         |     |                                                  | 68171 | 53      |      |    |       |       |    |     |      |       | act         |        |               |        |               |
|   |                  |                               |         |     |                                                  |       |         |      |    |       |       |    | 0   |      |       | mediu       |        |               |        |               |
| 2 | Primary tumor    | Private in primary tumor      | 22:4677 | CEL | cadherin, EGF LAG seven-pass G-type              | ENST0 | ENSP00  |      | R/ | Cgg/  |       | .  | 1   | 2.63 | 1.205 | m_imp       | 1.915  | high_impact   | 1.756  | medium_impact |
|   |                  |                               | 7744    | SR1 | receptor 1 (flamingo homolog, Drosophila)        | 00002 | 0002627 | 2363 | W  | Tgg   | -     | 0  | 0   |      |       | act         |        | ct            |        | act           |
|   |                  |                               |         |     |                                                  | 62738 | 38      |      |    |       |       | 1  |     |      |       |             |        |               |        |               |
| 2 | Liver metastases | Private in metastatic tumor   | 16:5586 | CES | carboxylesterase 1                               | ENST0 | ENSP00  |      | G/ | gGc/  | -     | 0  | 1   | NA   | 1.953 | m_imp       | 1.574  | high_impact   | NA     | NA            |
|   |                  |                               | 2844    | 1   |                                                  | 00004 | 0003904 | 31   | A  | gCc   | -     | 0  |     |      |       | act         |        | ct            |        |               |
|   |                  |                               |         |     |                                                  | 22046 | 92      |      |    |       |       |    |     |      |       |             |        |               |        |               |
| 2 | Primary tumor    | Private in primary tumor      | 3:12626 | CH  | carbohydrate (chondroitin 4) sulfotransferase    | ENST0 | ENSP00  |      | R/ | Cgg/  | rs105 | 0  | 0   | NA   | 2.103 | high_impact | -1.305 | low_impact    | NA     | NA            |
|   |                  |                               | 1207    | ST1 | 13                                               | 00003 | 0003730 | 211  | W  | Tgg   | 6523  |    |     |      |       | pact        |        | ct            |        |               |
|   |                  |                               |         |     |                                                  | 83575 | 69      |      |    |       |       |    |     |      |       |             |        |               |        |               |
| 2 | Primary tumor    | Private in primary tumor      | 11:4683 | CKA | cytoskeleton associated protein 5                | ENST0 | ENSP00  |      | L/ | tTg/t | -     | 0  | 0.9 | NA   | 2.117 | high_impact | 1.705  | high_impact   | NA     | NA            |
|   |                  |                               | 2681    | P5  |                                                  | 00003 | 0003102 | 169  | S  | Cg    | -     | 0  | 98  |      |       | pact        |        | ct            |        |               |
|   |                  |                               |         |     |                                                  | 12055 | 27      |      |    |       |       |    |     |      |       |             |        |               |        |               |
| 2 | Primary tumor    | Private in primary tumor      | 5:79029 | CM  | cardiomyopathy associated 5                      | ENST0 | ENSP00  |      | I/ | aTt/a | rs168 | 0  | 0.3 | 0.69 | 2.02  | high_impact | 0.111  | medium_impact | -0.403 | low_impact    |
|   |                  |                               | 726     | YA5 |                                                  | 00004 | 0003947 | 1713 | N  | At    | 77141 | 64 |     |      |       | pact        |        | mpact         |        |               |
|   |                  |                               |         |     |                                                  | 46378 | 70      |      |    |       |       |    |     |      |       |             |        |               |        |               |
|   |                  |                               |         |     |                                                  |       |         |      |    |       |       | 0  |     |      |       |             |        |               |        |               |
| 2 | Primary tumor    | Private in primary tumor      | 10:1058 | COL | collagen, type XVII, alpha 1                     | ENST0 | ENSP00  |      | T/ | aCg/  | rs805 | .  | 0.9 | NA   | -0.31 | low_impact  | 1.512  | high_impact   | NA     | NA            |
|   |                  |                               | 24333   | 17A |                                                  | 00003 | 0003769 | 210  | M  | aTg   | 708   | 2  | 97  |      | 6     | pact        |        | ct            |        |               |
|   |                  |                               |         |     |                                                  | 93211 | 05      |      |    |       |       | 5  |     |      |       |             |        |               |        |               |
|   |                  |                               |         |     |                                                  |       |         |      |    |       |       | 0  |     |      |       |             |        |               |        |               |
| 2 | Primary tumor    | Private in primary tumor      | X:10740 | COL | collagen, type IV, alpha 6                       | ENST0 | ENSP00  |      | P/ | cCt/c | -     | .  | 1   | NA   | 0.046 | m_impact    | 1.682  | high_impact   | NA     | NA            |
|   |                  |                               | 4863    | 4A6 |                                                  | 00003 | 0003783 | 1441 | H  | At    | -     | 1  |     |      |       | act         |        | ct            |        |               |
|   |                  |                               |         |     |                                                  | 94872 | 40      |      |    |       |       | 4  |     |      |       |             |        |               |        |               |
|   |                  |                               |         |     |                                                  |       |         |      |    |       |       |    |     |      |       |             |        |               |        |               |
| 2 | Liver metastases | Private in metastatic tumor   | 10:7699 | CO  | catechol-O-methyltransferase domain containing 1 | ENST0 | ENSP00  |      | G/ | Ggg/  | -     | 0  | 1   | NA   | 2.52  | high_impact | 2.775  | high_impact   | NA     | NA            |
|   |                  |                               | 4883    | MT  |                                                  | 00005 | 0004441 | 128  | W  | Tgg   | -     | 0  |     |      |       | pact        |        | ct            |        |               |
|   |                  |                               |         | D1  |                                                  | 36650 | 68      |      |    |       |       |    |     |      |       |             |        |               |        |               |

|   |                      |                                                  |                 |                |                                           |                         |                         |      |         |             |                     |         |               |                       |                       |                |                |                   |    |
|---|----------------------|--------------------------------------------------|-----------------|----------------|-------------------------------------------|-------------------------|-------------------------|------|---------|-------------|---------------------|---------|---------------|-----------------------|-----------------------|----------------|----------------|-------------------|----|
| 2 | Prima<br>ry<br>tumor | Common in<br>primary and<br>metastatic<br>tumors | 11:6856<br>0822 | CPT<br>1A      | carnitine palmitoyltransferase 1A (liver) | ENST0<br>00005<br>39743 | ENSP00<br>0004461<br>08 | 310  | R/<br>W | Cgg/<br>Tgg | -<br>0              | 0<br>99 | 0.9<br>NA     | 1.809                 | mediu<br>m_imp<br>act | 2.053          | high_imp<br>ct | NA                | NA |
| 2 | metas<br>tases       | Common in<br>primary and<br>metastatic<br>tumors | 11:6856<br>0822 | CPT<br>1A      | carnitine palmitoyltransferase 1A (liver) | ENST0<br>00005<br>40367 | ENSP00<br>0004390<br>84 | 310  | R/<br>W | Cgg/<br>Tgg | -<br>0              | 0<br>97 | 0.9<br>NA     | 1.809                 | mediu<br>m_imp<br>act | 1.793          | high_imp<br>ct | NA                | NA |
| 2 | Prima<br>ry<br>tumor | Private in<br>primary tumor                      | 6:43188<br>273  | CUL<br>9       | cullin 9                                  | ENST0<br>00003<br>72647 | ENSP00<br>0003617<br>30 | 2092 | C/<br>S | tGc/t<br>Cc | -<br>0              | 0<br>99 | 0.9<br>NA     | 1.981                 | mediu<br>m_imp<br>act | 1.955          | high_imp<br>ct | NA                | NA |
| 2 | Prima<br>ry<br>tumor | Private in<br>primary tumor                      | 16:7039<br>8463 | DD<br>X19<br>A | DEAD (Asp-Glu-Ala-As) box polypeptide 19A | ENST0<br>00003<br>02227 | ENSP00<br>0003062<br>09 | 27   | A/<br>G | gCc/<br>gGc | -<br>6              | 0<br>1  | 1<br>NA       | -0.83<br>6            | low_im<br>pact        | 1.941          | high_imp<br>ct | NA                | NA |
| 2 | Prima<br>ry<br>tumor | Private in<br>primary tumor                      | 15:4066<br>2323 | DIS<br>P2      | dispatched homolog 2 (Drosophila)         | ENST0<br>00002<br>67889 | ENSP00<br>0002678<br>89 | 1337 | R/<br>Q | cGg/<br>cAg | -<br>0              | 0<br>1  | 1.04<br>2.064 | high_im<br>pact       | 1.91                  | high_imp<br>ct | 0.049          | low_impact        |    |
| 2 | Prima<br>ry<br>tumor | Common in<br>primary and<br>metastatic<br>tumors | 4:34753<br>45   | DO<br>K7       | docking protein 7                         | ENST0<br>00005<br>07039 | ENSP00<br>0004236<br>14 | 105  | R/<br>C | Cgc/<br>Tgc | rs115<br>88346<br>8 | 0<br>1  | 1<br>NA       | 2.158                 | high_im<br>pact       | 1.993          | high_imp<br>ct | NA                | NA |
| 2 | metas<br>tases       | Common in<br>primary and<br>metastatic<br>tumors | 4:34753<br>45   | DO<br>K7       | docking protein 7                         | ENST0<br>00005<br>07039 | ENSP00<br>0004236<br>14 | 105  | R/<br>C | Cgc/<br>Tgc | rs115<br>88346<br>8 | 0<br>1  | 1<br>NA       | 2.158                 | high_im<br>pact       | 1.993          | high_imp<br>ct | NA                | NA |
| 2 | Prima<br>ry<br>tumor | Common in<br>primary and<br>metastatic<br>tumors | 18:3244<br>3980 | DTN<br>A       | dystrobrevin, alpha                       | ENST0<br>00003<br>99113 | ENSP00<br>0003820<br>64 | 539  | R/<br>Q | cGg/<br>cAg | -<br>0              | 0<br>1  | 2.36<br>1.155 | mediu<br>m_imp<br>act | 1.838                 | high_imp<br>ct | 1.332          | medium_imp<br>act |    |

|   |                         |                                         |         |     |                                                                                                                |           |              |      |     |         |     |      |     |       |       |             |        |               |       |               |  |  |
|---|-------------------------|-----------------------------------------|---------|-----|----------------------------------------------------------------------------------------------------------------|-----------|--------------|------|-----|---------|-----|------|-----|-------|-------|-------------|--------|---------------|-------|---------------|--|--|
| 2 | Liver metastases tumors | Common in primary and metastatic tumors | 18:3244 | DTN | dystrobrevin, alpha                                                                                            | ENST00003 | ENSP00003820 | 539  | R/Q | cGg/cAg | -   | 0    | 1   | 2.36  | 1.155 | mediu_m_imp | 1.838  | high_impact   | 1.332 | medium_impact |  |  |
|   |                         |                                         | 3980    | A   |                                                                                                                |           | 99113        | 64   |     |         |     | 0    |     |       |       |             | act    | ct            |       | act           |  |  |
|   |                         |                                         |         |     |                                                                                                                |           |              |      |     |         |     |      | 1   |       |       |             |        |               |       |               |  |  |
| 2 | Primary tumor           | Private in primary tumor                | 17:4292 | EFT | elongation factor Tu GTP binding domain containing 2                                                           | ENST00004 | ENSP00003920 | 907  | V/A | gTg/gCg | -   | 0    | 0.9 | 2.7   | 1.937 | mediu_m_imp | 2      | high_impact   | 1.157 | medium_impact |  |  |
|   |                         |                                         | 9181    | UD2 |                                                                                                                |           | 26333        | 94   |     |         |     | 0    | 99  |       |       |             | act    | ct            |       | act           |  |  |
|   |                         |                                         |         |     |                                                                                                                |           |              |      |     |         |     |      |     |       |       |             |        |               |       |               |  |  |
| 2 | Primary tumor           | Private in primary tumor                | 11:6236 | EML | echinoderm microtubule associated protein like 3                                                               | ENST00002 | ENSP00002788 | 896  | D/Y | Gac/Tac | -   | 0    | 0   | NA    | 2.062 | high_impact | -1.483 | low_impact    | NA    | NA            |  |  |
|   |                         |                                         | 9955    | 3   |                                                                                                                |           | 78845        | 45   |     |         |     | 0    | 0   |       |       |             | pact   | ct            |       |               |  |  |
|   |                         |                                         |         |     |                                                                                                                |           |              |      |     |         |     |      |     |       |       |             |        |               |       |               |  |  |
| 2 | Primary tumor           | Private in primary tumor                | 2:55126 | EML | echinoderm microtubule associated protein like 6                                                               | ENST00003 | ENSP00003488 | 1004 | L/F | ttG/ttT | -   | 0    | 1   | 3.345 | 2.062 | high_impact | 1.894  | high_impact   | 2.442 | medium_impact |  |  |
|   |                         |                                         | 807     | 6   |                                                                                                                |           | 56458        | 42   |     |         |     | 0    | 1   |       |       |             | pact   | ct            |       | act           |  |  |
|   |                         |                                         |         |     |                                                                                                                |           |              |      |     |         |     |      |     |       |       |             |        |               |       |               |  |  |
| 2 | Primary tumor           | Common in primary and metastatic tumors | 17:3788 | ERB | v-erb-b2 erythroblastic leukemia viral oncogene homolog 2, neuro/glioblastoma derived oncogene homolog (avian) | ENST00004 | ENSP00003851 | 739  | D/Y | Gac/Tac | COS | 0    | 1   | NA    | 2.062 | high_impact | 1.615  | high_impact   | NA    | NA            |  |  |
|   |                         |                                         | 0261    | B2  |                                                                                                                |           | 06381        | 85   |     |         |     | M131 |     |       |       |             |        | pact          | ct    |               |  |  |
|   |                         |                                         |         |     |                                                                                                                |           |              |      |     |         |     |      |     |       |       |             |        |               |       |               |  |  |
| 2 | Liver metastases tumors | Common in primary and metastatic tumors | 17:3788 | ERB | v-erb-b2 erythroblastic leukemia viral oncogene homolog 2, neuro/glioblastoma derived oncogene homolog (avian) | ENST00005 | ENSP00004435 | 739  | D/Y | Gac/Tac | COS | 0    | 1   | NA    | 2.062 | high_impact | 1.615  | high_impact   | NA    | NA            |  |  |
|   |                         |                                         | 0261    | B2  |                                                                                                                |           | 40147        | 62   |     |         |     | M131 |     |       |       |             |        |               | pact  | ct            |  |  |
|   |                         |                                         |         |     |                                                                                                                |           |              |      |     |         |     |      |     |       |       |             |        |               |       |               |  |  |
| 2 | Liver metastases tumor  | Private in metastatic tumor             | 17:7401 | EVP | envoplakin                                                                                                     | ENST00003 | ENSP00003016 | 87   | L/P | cTg/cCg | -   | 0    | 0.9 | 1.75  | 2.126 | high_impact | 1.127  | medium_impact | 0.691 | low_impact    |  |  |
|   |                         |                                         | 9674    | L   |                                                                                                                |           | 01607        | 07   |     |         |     | 0    | 88  |       |       |             |        | pact          | mpact |               |  |  |
|   |                         |                                         |         |     |                                                                                                                |           |              |      |     |         |     |      |     |       |       |             |        |               |       |               |  |  |
| 2 | Liver metastases tumor  | Private in metastatic tumor             | 7:48020 | FOX | forkhead box K1                                                                                                | ENST00004 | ENSP00003944 | 565  | G/R | Ggg/Agg | -   | 0    | 0.9 | NA    | 1.754 | mediu_m_imp | 1.735  | high_impact   | NA    | NA            |  |  |
|   |                         |                                         | 75      | K1  |                                                                                                                |           | 46823        | 42   |     |         |     | 0    | 98  |       |       |             | act    | ct            |       |               |  |  |
|   |                         |                                         |         |     |                                                                                                                |           |              |      |     |         |     |      |     |       |       |             |        |               |       |               |  |  |
| 2 | Primary tumor           | Common in primary and metastatic        | 2:49196 | FSH | follicle stimulating hormone receptor                                                                          | ENST00003 | ENSP00003067 | 198  | D/Y | Gat/Tat | -   | 0    | 1   | NA    | 2.128 | high_impact | 1.897  | high_impact   | NA    | NA            |  |  |
|   |                         |                                         | 021     | R   |                                                                                                                |           | 04421        | 80   |     |         |     | 0    | 1   |       |       |             |        | pact          | ct    |               |  |  |
|   |                         |                                         |         |     |                                                                                                                |           |              |      |     |         |     |      |     |       |       |             |        |               |       |               |  |  |

|   |       |             |         |     |                                        |       |         |     |    |      |       |   |     |       |         |          |               |               |               |               |
|---|-------|-------------|---------|-----|----------------------------------------|-------|---------|-----|----|------|-------|---|-----|-------|---------|----------|---------------|---------------|---------------|---------------|
|   |       | tumors      |         |     |                                        |       |         |     |    |      |       |   |     |       |         |          |               |               |               |               |
|   |       | Common in   |         |     |                                        |       |         |     |    |      |       |   |     |       |         |          |               |               |               |               |
| 2 | Liver | primary and | 2:49196 | FSH |                                        | ENST0 | ENSP00  |     |    |      |       |   |     |       | high_im | 1.897    | high_impact   | NA            | NA            |               |
|   | metas | metastatic  | 021     | R   | follicle stimulating hormone receptor  | 00003 | 0003067 | 198 | D/ | Gat/ | -     | 0 | 1   | NA    | 2.128   |          |               |               |               |               |
|   | tases | tumors      |         |     |                                        | 04421 | 80      |     | Y  | Tat  |       |   |     |       |         |          |               |               |               |               |
|   |       | Common in   |         |     |                                        |       |         |     |    |      |       |   |     |       |         |          |               |               |               |               |
| 2 | Prima | primary and | 17:7808 | GA  |                                        | ENST0 | ENSP00  |     |    |      |       |   |     |       | high_im | 1.634    | high_impact   | 2.079         | medium_impact |               |
|   | ry    | metastatic  | 5871    | A   | glucosidase, alpha                     | 00003 | 0003056 | 576 | G/ | Ggc/ | rs180 | 0 | 1   | 3.255 | 2.035   |          |               |               |               |               |
|   | tumor | tumors      |         |     |                                        | 02262 | 92      |     | S  | Agc  | 0307  |   |     |       |         |          |               |               |               |               |
|   |       | Common in   |         |     |                                        |       |         |     |    |      |       |   |     |       |         |          |               |               |               |               |
| 2 | Liver | primary and | 17:7808 | GA  |                                        | ENST0 | ENSP00  |     |    |      |       |   |     |       | high_im | 1.634    | high_impact   | 2.079         | medium_impact |               |
|   | metas | metastatic  | 5871    | A   | glucosidase, alpha                     | 00003 | 0003746 | 576 | G/ | Ggc/ | rs180 | 0 | 1   | 3.255 | 2.035   |          |               |               |               |               |
|   | tases | tumors      |         |     |                                        | 90015 | 65      |     | S  | Agc  | 0307  |   |     |       |         |          |               |               |               |               |
|   |       | Common in   |         |     |                                        |       |         |     |    |      |       |   |     |       |         |          |               |               |               |               |
| 2 | Prima | primary and | 14:2470 | GM  |                                        | ENST0 | ENSP00  |     |    |      |       |   |     |       | mediu   |          | high_impact   | NA            | NA            |               |
|   | ry    | metastatic  | 7598    | PR2 | guanosine monophosphate reductase 2    | 00003 | 0003344 | 282 | V/ | Gtg/ | -     | 0 | 0.9 | NA    | 1.972   | m_impact | 1.568         |               |               |               |
|   | tumor | tumors      |         |     |                                        | 48719 | 09      |     | M  | Atg  |       |   | 97  |       |         |          |               |               |               |               |
|   |       | Common in   |         |     |                                        |       |         |     |    |      |       |   |     |       |         |          |               |               |               |               |
| 2 | Liver | primary and | 14:2470 | GM  |                                        | ENST0 | ENSP00  |     |    |      |       |   |     |       | mediu   |          | high_impact   | NA            | NA            |               |
|   | metas | metastatic  | 7598    | PR2 | guanosine monophosphate reductase 2    | 00003 | 0003344 | 282 | V/ | Gtg/ | -     | 0 | 0.9 | NA    | 1.972   | m_impact | 1.568         |               |               |               |
|   | tases | tumors      |         |     |                                        | 48719 | 09      |     | M  | Atg  |       |   | 97  |       |         |          |               |               |               |               |
|   |       | Common in   |         |     |                                        |       |         |     |    |      |       |   |     |       |         |          |               |               |               |               |
| 2 | Prima | primary and | 12:1314 | GP  |                                        | ENST0 | ENSP00  |     |    |      |       |   |     |       | high_im | 1.083    | medium_impact | 1.158         | medium_impact |               |
|   | ry    | metastatic  | 56051   | R13 | G protein-coupled receptor 133         | 00002 | 0002616 | 79  | K/ | aAg/ | -     | 0 | 0.9 | 1.955 | 2.048   |          |               |               |               |               |
|   | tumor | tumors      |         | 3   |                                        | 61654 | 54      |     | R  | aGg  |       |   | 67  |       |         |          |               |               |               |               |
|   |       | Common in   |         |     |                                        |       |         |     |    |      |       |   |     |       |         |          |               |               |               |               |
| 2 | Liver | primary and | 12:1314 | GP  |                                        | ENST0 | ENSP00  |     |    |      |       |   |     |       | high_im | 1.083    | medium_impact | 1.158         | medium_impact |               |
|   | metas | metastatic  | 56051   | R13 | G protein-coupled receptor 133         | 00002 | 0002616 | 79  | K/ | aAg/ | -     | 0 | 0.9 | 1.955 | 2.048   |          |               |               |               |               |
|   | tases | tumors      |         | 3   |                                        | 61654 | 54      |     | R  | aGg  |       |   | 67  |       |         |          |               |               |               |               |
| 2 | Liver | Private in  | 10:4699 | GP  | G protein regulated inducer of neurite | ENST0 | ENSP00  | 348 | V/ | Gtg/ | rs492 | 0 | 0.8 | 2.36  | 2.929   | high_im  | 0.429         | medium_impact | 1.596         | medium_impact |

|   |       |               |         |     |                                           |       |         |     |    |       |       |    |     |       |       |         |        |             |        |            |
|---|-------|---------------|---------|-----|-------------------------------------------|-------|---------|-----|----|-------|-------|----|-----|-------|-------|---------|--------|-------------|--------|------------|
|   | metas | metastatic    | 9922    | RIN | outgrowth 2                               | 00003 | 0003634 |     | L  | Ttg   | 6046  | 14 |     |       | pact  |         | mpact  |             | act    |            |
|   | tases | tumor         |         | 2   |                                           | 74317 | 36      |     |    |       |       |    |     |       |       |         |        |             |        |            |
| 2 | Liver | Private in    | 1:55134 | HEA |                                           | ENST0 | ENSP00  |     |    |       |       |    |     |       |       |         |        |             |        |            |
|   | metas | metastatic    | 585     | TR8 | HEAT repeat containing 8                  | 00004 | 0004047 | 455 | K/ | aAg/  | rs230 | 0  | 0.8 | NA    | 2.117 | high_im | 0.706  | medium_i    | NA     | NA         |
|   | tases | tumor         |         |     |                                           | 38846 | 80      |     | R  | aGg   | 4314  | 89 |     |       | pact  |         | mpact  |             |        |            |
| 2 | Prima | Common in     | 6:13948 | HE  |                                           | ENST0 | ENSP00  |     |    |       |       |    |     |       |       |         |        |             |        |            |
|   | ry    | primary and   | 8030    | CA  | headcase homolog (Drosophila)             | 00003 | 0003566 | 294 | L/ | cTc/c | -     | 0  | 0.9 | 0.805 | 2.064 | high_im | 1.106  | medium_i    | -0.196 | low_impact |
|   | tumor | metastatic    |         |     |                                           | 67658 | 30      |     | R  | Gc    |       | 75 |     |       | pact  |         | mpact  |             |        |            |
|   |       | tumors        |         |     |                                           |       |         |     |    |       |       |    |     |       |       |         |        |             |        |            |
| 2 | Liver | Common in     | 6:13948 | HE  |                                           | ENST0 | ENSP00  |     |    |       |       |    |     |       |       |         |        |             |        |            |
|   | metas | primary and   | 8030    | CA  | headcase homolog (Drosophila)             | 00003 | 0003566 | 294 | L/ | cTc/c | -     | 0  | 0.9 | 0.805 | 2.064 | high_im | 1.106  | medium_i    | -0.196 | low_impact |
|   | tases | metastatic    |         |     |                                           | 67658 | 30      |     | R  | Gc    |       | 75 |     |       | pact  |         | mpact  |             |        |            |
|   |       | tumors        |         |     |                                           |       |         |     |    |       |       |    |     |       |       |         |        |             |        |            |
| 2 | Prima | Private in    | 6:34211 | HM  |                                           | ENST0 | ENSP00  |     |    |       |       |    |     |       |       |         |        |             |        |            |
|   | ry    | primary tumor | 288     | GA1 | high mobility group AT-hook 1             | 00004 | 0003998 | 88  | K/ | aAa/  | -     | 0  | 0   | 0.55  | 2.039 | high_im | -1.648 | low_impact  | -0.936 | low_impact |
|   | tumor |               |         |     |                                           | 47654 | 88      |     | R  | aGa   |       |    |     |       | pact  |         | ct     |             |        |            |
| 2 | Prima | Common in     | 10:1248 | HM  |                                           | ENST0 | ENSP00  |     |    |       |       |    |     |       |       |         |        |             |        |            |
|   | ry    | primary and   | 95955   | X3  | H6 family homeobox 3                      | 00003 | 0003505 | 130 | P/ | cCg/  | -     | 0  | 0.0 | 0.55  | 2.056 | high_im | -0.446 | low_impact  | -0.51  | low_impact |
|   | tumor | metastatic    |         |     |                                           | 57878 | 49      |     | L  | cTg   |       | 72 |     |       | pact  |         | ct     |             |        |            |
|   |       | tumors        |         |     |                                           |       |         |     |    |       |       |    |     |       |       |         |        |             |        |            |
| 2 | Liver | Common in     | 10:1248 | HM  |                                           | ENST0 | ENSP00  |     |    |       |       |    |     |       |       |         |        |             |        |            |
|   | metas | primary and   | 95955   | X3  | H6 family homeobox 3                      | 00003 | 0003505 | 130 | P/ | cCg/  | -     | 0  | 0.0 | 0.55  | 2.056 | high_im | -0.446 | low_impact  | -0.51  | low_impact |
|   | tases | metastatic    |         |     |                                           | 57878 | 49      |     | L  | cTg   |       | 72 |     |       | pact  |         | ct     |             |        |            |
|   |       | tumors        |         |     |                                           |       |         |     |    |       |       |    |     |       |       |         |        |             |        |            |
| 2 | Prima | Common in     | 1:24501 | HN  |                                           | ENST0 | ENSP00  |     |    |       |       |    |     |       |       |         |        |             |        |            |
|   | ry    | primary and   | 8856    | RN  | heterogeneous nuclear ribonucleoprotein U | 00004 | 0003931 | 722 | G/ | gGt/g | -     | 0  | 0.9 | NA    | 2.056 | high_im | 1.508  | high_impact | NA     | NA         |
|   | tumor | metastatic    |         | PU  | (scaffold attachment factor A)            | 44376 | 51      |     | V  | Tt    |       | 95 |     |       | pact  |         | ct     |             |        |            |
|   |       | tumors        |         |     |                                           |       |         |     |    |       |       |    |     |       |       |         |        |             |        |            |
| 2 | Liver | Common in     | 1:24501 | HN  |                                           | ENST0 | ENSP00  |     |    |       |       |    |     |       |       |         |        |             |        |            |
|   | metas | primary and   | 8856    | RN  | heterogeneous nuclear ribonucleoprotein U | 00004 | 0004164 | 666 | G/ | gGt/g | -     | 0  | 0.9 | NA    | 2.056 | high_im | 1.508  | high_impact | NA     | NA         |
|   | tases | metastatic    |         |     | (scaffold attachment factor A)            |       |         |     | V  | Tt    |       | 95 |     |       | pact  |         | ct     |             |        |            |
|   |       | tumors        |         |     |                                           |       |         |     |    |       |       |    |     |       |       |         |        |             |        |            |



|   |       |               |         |      |                             |       |         |      |    |       |   |   |     |         |       |           |       |             |       |
|---|-------|---------------|---------|------|-----------------------------|-------|---------|------|----|-------|---|---|-----|---------|-------|-----------|-------|-------------|-------|
|   | tases | metastatic    |         | PU   |                             | 27948 | 55      |      |    |       |   |   |     |         |       |           |       |             |       |
|   |       | tumors        |         |      |                             |       |         |      |    |       |   |   |     |         |       |           |       |             |       |
| 2 | Liver | Private in    | 3:18639 | HR   |                             | ENST0 | ENSP00  |      |    |       |   |   |     | high_im |       | medium_i  |       | medium_imp  |       |
|   | metas | metastatic    | 5286    | G    | histidine-rich glycoprotein | 00002 | 0002320 | 398  | G/ | Gga/  | - | 0 | 0.8 | 2.25    | 2.142 | pact      | 0.825 | medium_i    | 1.556 |
|   | tases | tumor         |         |      |                             | 32003 | 03      |      | R  | Cga   |   |   | 96  |         |       |           |       | act         |       |
| 2 | Liver | Private in    | 4:14265 | IL15 |                             | ENST0 | ENSP00  |      |    |       |   |   |     | mediu   |       | high_impa |       | medium_imp  |       |
|   | metas | metastatic    | 1060    |      | interleukin 15              | 00003 | 0003235 | 101  | E/ | Gag/  | - | 0 | 1   | 2.645   | 1.781 | m_imp     | 1.971 | high_impact | 1.021 |
|   | tases | tumor         |         |      |                             | 20650 | 05      |      | K  | Aag   |   |   |     |         |       | act       |       | act         |       |
| 2 | Liver | Private in    | 1:62367 | INA  |                             | ENST0 | ENSP00  |      |    |       |   |   |     | high_im |       | high_impa |       | NA          |       |
|   | metas | metastatic    | 114     | DL   | InaD-like (Drosophila)      | 00002 | 0002552 | 1122 | G/ | Gga/  | - | 0 | 1   | NA      | 2.062 | pact      | 1.894 | high_impact | NA    |
|   | tases | tumor         |         |      |                             | 55202 | 02      |      | R  | Aga   |   |   |     |         |       |           |       | NA          |       |
| 2 | Prima | Common in     |         |      |                             | ENST0 | ENSP00  |      |    |       |   |   |     | mediu   |       | high_impa |       | low_impact  |       |
|   | ry    | primary and   | 2:12110 | INH  |                             | 00002 | 0002952 | 359  | R/ | cGc/  | - | 0 | 1   | 1.665   | 1.75  | m_imp     | 1.731 | high_impact | 0.717 |
|   | tumor | metastatic    | 7302    | BB   | inhibin, beta B             | 95228 | 28      |      | H  | cAc   |   |   |     |         |       | act       |       |             |       |
|   |       | tumors        |         |      |                             |       |         |      |    |       |   |   |     |         |       |           |       |             |       |
| 2 | Liver | Common in     |         |      |                             | ENST0 | ENSP00  |      |    |       |   |   |     | mediu   |       | high_impa |       | low_impact  |       |
|   | metas | primary and   | 2:12110 | INH  |                             | 00002 | 0002952 | 359  | R/ | cGc/  | - | 0 | 1   | 1.665   | 1.75  | m_imp     | 1.731 | high_impact | 0.717 |
|   | tases | metastatic    | 7302    | BB   | inhibin, beta B             | 95228 | 28      |      | H  | cAc   |   |   |     |         |       | act       |       |             |       |
|   |       | tumors        |         |      |                             |       |         |      |    |       |   |   |     |         |       |           |       |             |       |
| 2 | Prima | Private in    | 7:48301 | KIA  |                             | ENST0 | ENSP00  |      |    |       |   | 0 |     |         |       | mediu     |       | high_impact |       |
|   | ry    | primary tumor | 42      | A04  | KIAA0415                    | 00003 | 0002975 | 620  | V/ | Gtg/  | - | . | 0.9 | NA      | 1.182 | m_imp     | 1.537 | high_impact | NA    |
|   | tumor |               |         | 15   |                             | 48624 | 62      |      | M  | Atg   |   | 0 | 96  |         |       | act       |       | NA          |       |
|   |       |               |         |      |                             |       |         |      |    |       |   | 1 |     |         |       |           |       |             |       |
| 2 | Liver | Private in    | 17:3973 | KRT  |                             | ENST0 | ENSP00  |      |    |       |   | 0 |     |         |       | mediu     |       | high_impact |       |
|   | metas | metastatic    | 9541    | 14   | keratin 14                  | 00001 | 0001675 | 407  | R/ | cGg/  | - | . | 1   | 2.705   | 1.124 | m_imp     | 1.891 | high_impact | 1.767 |
|   | tases | tumor         |         |      |                             | 67586 | 86      |      | Q  | cAg   |   | 0 |     |         |       | act       |       | act         |       |
|   |       |               |         |      |                             |       |         |      |    |       |   | 1 |     |         |       |           |       |             |       |
| 2 | Prima | Private in    | 17:3950 | KRT  |                             | ENST0 | ENSP00  |      |    |       |   | 0 |     |         |       | mediu     |       | high_impact |       |
|   | ry    | primary tumor | 5658    | 33A  | keratin 33A                 | 00000 | 0000077 | 124  | N/ | aAt/a | - | . | 0.9 | 3.685   | 0.795 | m_imp     | 1.682 | high_impact | 2.312 |
|   | tumor |               |         |      |                             | 07735 | 35      |      | T  | Ct    |   | 0 | 99  |         |       | act       |       | act         |       |

|   |       | Common in     |         |     |       |         |     |    |       |       |   |     |       |       |         |       |          |       |            |
|---|-------|---------------|---------|-----|-------|---------|-----|----|-------|-------|---|-----|-------|-------|---------|-------|----------|-------|------------|
| 2 | Prima | primary and   | 17:3921 | KRT | ENST0 | ENSP00  |     |    |       | rs113 |   |     |       |       |         |       |          |       |            |
|   | ry    | metastatic    | 6085    | AP2 | 00003 | 0003752 | 73  | C/ | tGc/t | 39706 | 0 | 0.9 | 2.095 | 2.929 | high_im | 1.512 | high_imp | 1.306 | medium_imp |
|   | tumor | tumors        |         | -3  | 91418 | 37      |     | Y  | Ac    | 0     |   | 97  |       |       | pact    |       | ct       |       | act        |
|   |       |               |         |     |       |         |     |    |       |       |   |     |       |       |         |       |          |       |            |
|   |       | Common in     |         |     |       |         |     |    |       |       |   |     |       |       |         |       |          |       |            |
| 2 | Liver | primary and   | 17:3921 | KRT | ENST0 | ENSP00  |     |    |       | rs113 |   |     |       |       |         |       |          |       |            |
|   | metas | metastatic    | 6085    | AP2 | 00003 | 0003752 | 73  | C/ | tGc/t | 39706 | 0 | 0.9 | 2.095 | 2.929 | high_im | 1.512 | high_imp | 1.306 | medium_imp |
|   | tases | tumors        |         | -3  | 91418 | 37      |     | Y  | Ac    | 0     |   | 97  |       |       | pact    |       | ct       |       | act        |
|   |       |               |         |     |       |         |     |    |       |       |   |     |       |       |         |       |          |       |            |
|   |       | Common in     |         |     |       |         |     |    |       |       |   |     |       |       |         |       |          |       |            |
| 2 | Prima | primary and   | 4:18254 | LET | ENST0 | ENSP00  |     |    |       |       | 0 |     |       |       |         |       |          |       |            |
|   | ry    | metastatic    | 72      | M1  | 00003 | 0003056 | 411 | P/ | Ccc/  | -     | . | 1   | 2.01  | 0.049 | m_imp   | 1.838 | high_imp | 0.979 | low_impact |
|   | tumor | tumors        |         |     | 02787 | 53      |     | S  | Tcc   |       | 1 |     |       |       | act     |       | ct       |       |            |
|   |       |               |         |     |       |         |     |    |       |       | 4 |     |       |       |         |       |          |       |            |
|   |       | Common in     |         |     |       |         |     |    |       |       |   |     |       |       |         |       |          |       |            |
| 2 | Liver | primary and   | 4:18254 | LET | ENST0 | ENSP00  |     |    |       |       | 0 |     |       |       |         |       |          |       |            |
|   | metas | metastatic    | 72      | M1  | 00003 | 0003056 | 411 | P/ | Ccc/  | -     | . | 1   | 2.01  | 0.049 | m_imp   | 1.838 | high_imp | 0.979 | low_impact |
|   | tases | tumors        |         |     | 02787 | 53      |     | S  | Tcc   |       | 1 |     |       |       | act     |       | ct       |       |            |
|   |       |               |         |     |       |         |     |    |       |       | 4 |     |       |       |         |       |          |       |            |
|   |       | Private in    |         |     |       |         |     |    |       |       |   |     |       |       |         |       |          |       |            |
| 2 | Liver | metastatic    | 5:17676 | LMA | ENST0 | ENSP00  |     |    |       |       |   | 0.9 |       |       |         |       |          |       |            |
|   | metas | tumor         | 4500    | N2  | 00005 | 0004252 | 173 | M/ | aTg/  | -     | 0 | 0.9 | NA    | 2.056 | high_im | 1.448 | medium_i | NA    | NA         |
|   | tases |               |         |     | 02560 | 29      |     | T  | aCg   |       |   | 94  |       |       | pact    |       | mpact    |       |            |
|   |       |               |         |     |       |         |     |    |       |       |   |     |       |       |         |       |          |       |            |
|   |       | Private in    |         |     |       |         |     |    |       |       |   |     |       |       |         |       |          |       |            |
| 2 | Prima | primary tumor | 20:6033 | LRR | ENST0 | ENSP00  |     |    |       | rs611 |   |     |       |       |         |       |          |       |            |
|   | ry    |               | 004     | N4  | 00003 | 0003681 | 148 | L/ | Ctc/T | 7050  | 0 | 0.9 | 3.685 | 2.062 | high_im | 1.031 | medium_i | 2.798 | medium_imp |
|   | tumor |               |         |     | 78858 | 35      |     | F  | tc    |       |   | 67  |       |       | pact    |       | mpact    |       | act        |
|   |       |               |         |     |       |         |     |    |       |       |   |     |       |       |         |       |          |       |            |
|   |       | Private in    |         |     |       |         |     |    |       |       |   |     |       |       |         |       |          |       |            |
| 2 | Liver | metastatic    | 12:5788 | MA  | ENST0 | ENSP00  |     |    |       |       |   | 0.9 |       |       |         |       |          |       |            |
|   | metas | tumor         | 3279    | RS  | 00005 | 0004461 | 118 | R/ | Cgg/  | -     | . | 0.9 | NA    | 0.694 | m_imp   | 1.89  | high_imp | NA    | NA         |
|   | tases |               |         |     | 37638 | 68      |     | W  | Tgg   |       | 0 | 95  |       |       | act     |       | ct       |       |            |
|   |       |               |         |     |       |         |     |    |       |       | 2 |     |       |       |         |       |          |       |            |
|   |       | Private in    |         |     |       |         |     |    |       |       |   |     |       |       |         |       |          |       |            |
| 2 | Liver | metastatic    | 1:34183 | ME  | ENST0 | ENSP00  |     |    |       |       |   | 0.4 |       |       |         |       |          |       |            |
|   | metas | tumor         | 68      | GF6 | 00002 | 0002945 | 664 | C/ | tGt/t | -     | 0 | 0.4 | NA    | 2.075 | high_im | 0.092 | medium_i | NA    | NA         |
|   | tases |               |         |     | 94599 | 99      |     | S  | Ct    |       |   | 16  |       |       | pact    |       | mpact    |       |            |

|   |                  |                                         |                 |                 |                                      |                |                |     |     |         |            |   |       |       |       |               |       |               |       |             |
|---|------------------|-----------------------------------------|-----------------|-----------------|--------------------------------------|----------------|----------------|-----|-----|---------|------------|---|-------|-------|-------|---------------|-------|---------------|-------|-------------|
| 2 | Primary tumor    | Private in primary tumor                | 17:3409<br>4795 | MM<br>P28       | matrix metalloproteinase 28          | ENST0000338839 | ENSP0000340652 | 381 | D/Y | Gat/Tat | -          | 0 | 0.698 | NA    | 2.174 | high_impact   | 0.426 | medium_impact | NA    | NA          |
| 2 | Primary tumor    | Common in primary and metastatic tumors | 18:1189<br>3557 | MP<br>PE1       | metallophosphoesterase 1             | ENST0000309976 | ENSP0000311200 | 100 | R/S | agA/agC | -          | 0 | 1     | 3.145 | 2.451 | high_impact   | 2.178 | high_impact   | 3.098 | high_impact |
| 2 | Liver metastases | Common in primary and metastatic tumors | 18:1189<br>3557 | MP<br>PE1       | metallophosphoesterase 1             | ENST0000317251 | ENSP0000312935 | 3   | R/S | agA/agC | -          | 0 | 1     | NA    | 2.451 | high_impact   | 2.178 | high_impact   | NA    | NA          |
| 2 | Liver metastases | Private in metastatic tumor             | 6:30593<br>485  | MR<br>PS1<br>8B | mitochondrial ribosomal protein S18B | ENST0000259873 | ENSP0000259873 | 230 | P/A | Ccc/Gcc | rs34315095 | 0 | 0.907 | 1.95  | 2.159 | high_impact   | 0.707 | medium_impact | 0.59  | low_impact  |
| 2 | Liver metastases | Private in metastatic tumor             | 8:11172<br>476  | MT<br>MR<br>9   | myotubularin related protein 9       | ENST000026292  | ENSP0000433239 | 254 | S/F | tCc/tTc | -          | 0 | 0.788 | NA    | 2.398 | high_impact   | 0.779 | medium_impact | NA    | NA          |
| 2 | Primary tumor    | Common in primary and metastatic tumors | 19:9003<br>645  | MU<br>C16       | mucin 16, cell surface associated    | ENST000042240  | ENSP0000444391 | 172 | T/I | aCt/aTt | rs11085777 | 0 | 0.76  | NA    | 2.929 | high_impact   | 0.348 | medium_impact | NA    | NA          |
| 2 | Liver metastases | Common in primary and metastatic tumors | 19:9003<br>645  | MU<br>C16       | mucin 16, cell surface associated    | ENST000042240  | ENSP0000444391 | 172 | T/I | aCt/aTt | rs11085777 | 0 | 0.76  | NA    | 2.929 | high_impact   | 0.348 | medium_impact | NA    | NA          |
| 2 | Primary tumor    | Common in primary and metastatic tumors | 17:4451<br>453  | MY<br>BBP<br>1A | MYB binding protein (P160) 1a        | ENST000054718  | ENSP0000254718 | 570 | R/H | cGc/cAc | rs56716962 | 0 | 0.99  | 1.935 | 0.782 | medium_impact | 1.877 | high_impact   | 0.961 | low_impact  |
| 2 | Liver            | Common in                               | 17:4451         | MY              | MYB binding protein (P160) 1a        | ENST000054718  | ENSP0000254718 | 570 | R/  | cGc/    | rs567      | 0 | 0.9   | 1.935 | 0.782 | medium_impact | 1.877 | high_impact   | 0.961 | low_impact  |

|   |                  |                               |                 |            |                                             |  |       |         |     |         |             |                |    |           |      |          |             |       |               |       |            |
|---|------------------|-------------------------------|-----------------|------------|---------------------------------------------|--|-------|---------|-----|---------|-------------|----------------|----|-----------|------|----------|-------------|-------|---------------|-------|------------|
|   | metastases       | primary and metastatic tumors | 453             | BBP        |                                             |  | 00002 | 0002547 | H   | cAc     | 16962       | .              | 99 |           |      | m_impact |             |       |               |       |            |
|   |                  | Common in                     |                 |            |                                             |  | ENST0 | ENSP00  |     |         |             |                |    |           |      |          |             |       |               |       |            |
| 2 | Primary tumor    | primary and metastatic tumors | 14:2389<br>4201 | MY<br>H7   | myosin, heavy chain 7, cardiac muscle, beta |  | 00005 | 0004460 | 819 | R/<br>Q | cGg/<br>cAg | -              | 0  | 0.5<br>94 | NA   | 2.018    | high_impact | 0.219 | medium_impact | NA    | NA         |
|   |                  | Common in                     |                 |            |                                             |  | ENST0 | ENSP00  |     |         |             |                |    |           |      |          |             |       |               |       |            |
| 2 | Liver metastases | primary and metastatic tumors | 14:2389<br>4201 | MY<br>H7   | myosin, heavy chain 7, cardiac muscle, beta |  | 00003 | 0003550 | 819 | R/<br>Q | cGg/<br>cAg | -              | 0  | 0.4<br>31 | 3.01 | 2.018    | high_impact | 0.065 | medium_impact | 0.795 | low_impact |
|   |                  | Common in                     |                 |            |                                             |  | ENST0 | ENSP00  |     |         |             |                |    |           |      |          |             |       |               |       |            |
| 2 | Primary tumor    | primary and metastatic tumors | 5:13873<br>0037 | NA<br>NA   |                                             |  | 00004 | 0004160 | 245 | Q/<br>R | cAg/<br>cGg | rs117<br>48963 | 0  | 0.8<br>89 | NA   | 2.929    | high_impact | 0.58  | medium_impact | NA    | NA         |
|   |                  | Common in                     |                 |            |                                             |  | ENST0 | ENSP00  |     |         |             |                |    |           |      |          |             |       |               |       |            |
| 2 | Liver metastases | primary and metastatic tumors | 5:13873<br>0037 | NA<br>NA   |                                             |  | 00004 | 0004160 | 245 | Q/<br>R | cAg/<br>cGg | rs117<br>48963 | 0  | 0.8<br>89 | NA   | 2.929    | high_impact | 0.58  | medium_impact | NA    | NA         |
|   |                  | Private in                    |                 |            |                                             |  | ENST0 | ENSP00  |     |         |             |                |    |           |      |          |             |       |               |       |            |
| 2 | Liver metastases | metastatic tumor              | 9:34724<br>832  | NA<br>NA   |                                             |  | 00005 | 0004417 | 218 | P/<br>L | cCg/<br>cTg | -              | 0  | 0.9<br>75 | NA   | 2.929    | high_impact | 0.976 | medium_impact | NA    | NA         |
|   |                  | Common in                     |                 |            |                                             |  | ENST0 | ENSP00  |     |         |             |                |    |           |      |          |             |       |               |       |            |
| 2 | Primary tumor    | primary and metastatic tumors | 1:14536<br>8518 | NBP<br>F10 | neuroblastoma breakpoint family, member 10  |  | 00003 | 0003583 | 615 | S/<br>L | tCa/t<br>Ta | rs618<br>13437 | 0  | 0.9<br>84 | NA   | 2.929    | high_impact | 1.09  | medium_impact | NA    | NA         |
|   |                  | Common in                     |                 |            |                                             |  | ENST0 | ENSP00  |     |         |             |                |    |           |      |          |             |       |               |       |            |
| 2 | Liver metastases | primary and metastatic tumors | 1:14536<br>8518 | NBP<br>F10 | neuroblastoma breakpoint family, member 10  |  | 00003 | 0003583 | 615 | S/<br>L | tCa/t<br>Ta | rs618<br>13437 | 0  | 0.9<br>84 | NA   | 2.929    | high_impact | 1.09  | medium_impact | NA    | NA         |

|   |                         |                                                  |                  |               |                                                                                    |                |                   |      |         |             |                |         |           |       |            |                       |       |                   |        |                   |
|---|-------------------------|--------------------------------------------------|------------------|---------------|------------------------------------------------------------------------------------|----------------|-------------------|------|---------|-------------|----------------|---------|-----------|-------|------------|-----------------------|-------|-------------------|--------|-------------------|
| 2 | Prima<br>ry<br>tumor    | Private in<br>primary tumor                      | 14:7555<br>8149  | NEK<br>9      | NIMA (never in mitosis gene a)- related kinase<br>9                                | ENST0<br>00002 | ENSP00<br>0002386 | 756  | G/<br>R | Ggg/<br>Agg | -<br>-         | 0<br>0  | 0.9<br>4  | 0     | 2.128      | high_im<br>pact       | 0.898 | medium_i<br>mpact | -1.125 | low_impact        |
| 2 | Prima<br>ry<br>tumor    | Private in<br>primary tumor                      | 10:1041<br>61600 | NFK<br>B2     | nuclear factor of kappa light polypeptide gene<br>enhancer in B-cells 2 (p49/p100) | ENST0<br>00004 | ENSP00<br>0004102 | 798  | L/<br>V | Ctg/<br>Gtg | -<br>-         | 0<br>97 | 0.9<br>97 | NA    | 2.033      | high_im<br>pact       | 1.523 | high_imp<br>act   | NA     | NA                |
| 2 | Liver<br>metas<br>tases | Private in<br>metastatic<br>tumor                | 11:2795<br>51    | NLR<br>P6     | NLR family, pyrin domain containing 6                                              | ENST0<br>00003 | ENSP00<br>0003097 | 85   | L/<br>P | cTc/c<br>Cc | -<br>-         | 0<br>98 | 0.9<br>98 | 2.775 | 2.011      | high_im<br>pact       | 1.666 | high_imp<br>act   | 1.516  | medium_imp<br>act |
| 2 | Prima<br>ry<br>tumor    | Private in<br>primary tumor                      | 16:1368<br>55    | NP<br>RL3     | nitrogen permease regulator-like 3 (S.<br>cerevisiae)                              | ENST0<br>00003 | ENSP00<br>0003828 | 519  | F/<br>Y | tTc/t<br>Ac | -<br>-         | 0<br>0  | 0.9<br>96 | NA    | 1.128      | mediu<br>m_imp<br>act | 1.566 | high_imp<br>act   | NA     | NA                |
| 2 | Liver<br>metas<br>tases | Private in<br>metastatic<br>tumor                | 15:2826<br>9996  | OC<br>A2      | oculocutaneous albinism II                                                         | ENST0<br>00004 | ENSP00<br>0004144 | 190  | C/<br>G | Tgt/<br>Ggt | -<br>-         | 0<br>88 | 0.9<br>88 | NA    | 2.037      | high_im<br>pact       | 0.744 | medium_i<br>mpact | NA     | NA                |
| 2 | Prima<br>ry<br>tumor    | Common in<br>primary and<br>metastatic<br>tumors | 5:16767<br>4845  | OD<br>Z2      | odz, odd Oz/ten-m homolog 2 (Drosophila)                                           | ENST0<br>00005 | ENSP00<br>0004294 | 2301 | R/<br>C | Cgc/<br>Tgc | -<br>-         | 0<br>1  | 0.9<br>99 | 1.67  | -0.04<br>2 | low_im<br>pact        | 1.968 | high_imp<br>act   | 0.495  | low_impact        |
| 2 | Liver<br>metas<br>tases | Common in<br>primary and<br>metastatic<br>tumors | 5:16767<br>4845  | OD<br>Z2      | odz, odd Oz/ten-m homolog 2 (Drosophila)                                           | ENST0<br>00005 | ENSP00<br>0004386 | 2300 | R/<br>C | Cgc/<br>Tgc | -<br>-         | 0<br>1  | 0.9<br>97 | NA    | -0.04<br>2 | low_im<br>pact        | 1.709 | high_imp<br>act   | NA     | NA                |
| 2 | Liver<br>metas<br>tases | Private in<br>metastatic<br>tumor                | 11:1323<br>07162 | OP<br>CM<br>L | opioid binding protein/cell adhesion<br>molecule-like                              | ENST0<br>00004 | ENSP00<br>0003906 | 173  | N/<br>K | aaC/<br>aaA | -<br>-         | 0<br>0  | 1<br>1    | NA    | 2.001      | high_im<br>pact       | 1.564 | high_imp<br>act   | NA     | NA                |
| 2 | Prima<br>ry<br>tumor    | Common in<br>primary and<br>metastatic           | 11:6942<br>726   | OR2<br>D3     | olfactory receptor, family 2, subfamily D,<br>member 3                             | ENST0<br>00003 | ENSP00<br>0003205 | 165  | W/<br>S | tGg/t<br>Cg | rs108<br>39659 | 0<br>0  | 1<br>1    | 3.88  | 1.67       | mediu<br>m_imp<br>act | 1.724 | high_imp<br>act   | 1.55   | medium_imp<br>act |

|   |       |               |         |     |                                               |       |         |      |    |       |       |   |     |       |       |         |          |        |            |
|---|-------|---------------|---------|-----|-----------------------------------------------|-------|---------|------|----|-------|-------|---|-----|-------|-------|---------|----------|--------|------------|
|   |       | tumors        |         |     |                                               |       |         |      |    |       |       |   |     |       |       |         |          |        |            |
|   |       | Common in     |         |     |                                               |       |         |      |    |       |       |   |     |       |       |         |          |        |            |
| 2 | Liver | primary and   | 11:6942 | OR2 | olfactory receptor, family 2, subfamily D,    | ENST0 | ENSP00  |      |    |       |       |   |     |       |       |         |          |        |            |
|   | metas | metastatic    | 726     | D3  | member 3                                      | 00003 | 0003205 | 165  | W/ | tGg/t | rs108 | 0 | 1   | 3.88  | 1.67  | mediu   | high_imp | 1.55   | medium_imp |
|   | tases | tumors        |         |     |                                               | 17834 | 60      |      | S  | Cg    | 39659 |   |     |       |       | act     | ct       |        | act        |
| 2 | Liver | Private in    | 16:8893 | PAB | poly(A) binding protein, nuclear 1-like       | ENST0 | ENSP00  |      |    |       |       |   |     |       |       |         |          |        |            |
|   | metas | metastatic    | 2012    | PN1 | (cytoplasmic)                                 | 00004 | 0003909 | 140  | E/ | Gag/  | -     | 0 | 0.7 | NA    | 2.056 | high_im | medium_i | NA     | NA         |
|   | tases | tumor         |         | L   |                                               | 27766 | 13      |      | K  | Aag   |       |   | 62  |       |       | pact    | mpact    |        |            |
| 2 | Liver | Private in    | 14:2456 | PCK | phosphoenolpyruvate carboxykinase 2           | ENST0 | ENSP00  |      |    |       |       |   |     |       |       |         |          |        |            |
|   | metas | metastatic    | 8323    | 2   | (mitochondrial)                               | 00005 | 0004418 | 110  | R/ | Cgg/  | rs754 | 0 | 0.9 | NA    | 1.517 | mediu   | high_imp | NA     | NA         |
|   | tases | tumor         |         |     |                                               | 45054 | 26      |      | W  | Tgg   | 97728 |   | 93  |       |       | m_imp   | ct       |        |            |
|   |       | Common in     |         |     |                                               |       |         |      |    |       |       |   |     |       |       |         |          |        |            |
| 2 | Prima | primary and   | 8:14499 | PLE | plectin                                       | ENST0 | ENSP00  |      |    |       |       |   |     |       |       |         |          |        |            |
|   | ry    | metastatic    | 1022    | C   |                                               | 00003 | 0003817 | 4291 | D/ | Gac/  | -     | . | 1   | NA    | 1.137 | mediu   | high_imp | NA     | NA         |
|   | tumor | tumors        |         |     |                                               | 98774 | 56      |      | Y  | Tac   |       |   | 0   |       |       | act     | ct       |        |            |
|   |       | Common in     |         |     |                                               |       |         |      |    |       |       |   |     |       |       |         |          |        |            |
| 2 | Liver | primary and   | 8:14499 | PLE | plectin                                       | ENST0 | ENSP00  |      |    |       |       |   |     |       |       |         |          |        |            |
|   | metas | metastatic    | 1022    | C   |                                               | 00003 | 0003466 | 4323 | D/ | Gac/  | -     | . | 1   | NA    | 1.137 | mediu   | high_imp | NA     | NA         |
|   | tases | tumors        |         |     |                                               | 54589 | 02      |      | Y  | Tac   |       |   | 0   |       |       | act     | ct       |        |            |
| 2 | Prima | Private in    | 8:12842 | PO  | POU class 5 homeobox 1B                       | ENST0 | ENSP00  |      |    |       |       |   |     |       |       |         |          |        |            |
|   | ry    | primary tumor | 8284    | U5F |                                               | 00003 | 0003755 | 58   | W/ | tGg/t | -     | 0 | 0.0 | 1.795 | 2.056 | high_im | low_imp  | 0.719  | low_impact |
|   | tumor |               |         | 1B  |                                               | 91675 | 57      |      | S  | Cg    |       |   | 02  |       |       | pact    | ct       |        |            |
| 2 | Liver | Private in    | 22:2204 | PPI | peptidylprolyl isomerase (cyclophilin)-like 2 | ENST0 | ENSP00  |      |    |       |       |   |     |       |       |         |          |        |            |
|   | metas | metastatic    | 2368    | L2  |                                               | 00004 | 0004052 | 112  | G/ | Ggg/  | -     | 0 | 0.9 | NA    | 1.916 | mediu   | high_imp | NA     | NA         |
|   | tases | tumor         |         |     |                                               | 46951 | 14      |      | R  | Cgg   |       |   | 99  |       |       | m_imp   | ct       |        |            |
| 2 | Liver | Private in    | 16:3109 | PRS | protease, serine, 53                          | ENST0 | ENSP00  |      |    |       |       |   |     |       |       |         |          |        |            |
|   | metas | metastatic    | 5649    | S53 |                                               | 00002 | 0002806 | 478  | S/ | tCt/t | -     | 0 | 0.9 | 4.225 | 2.061 | high_im | high_imp | 2.591  | medium_imp |
|   | tases | tumor         |         |     |                                               | 80606 | 06      |      | C  | Gt    |       |   | 96  |       |       | pact    | ct       |        | act        |
| 2 | Liver | Private in    | 6:31106 | PS  | psoriasis susceptibility 1 candidate 1        | ENST0 | ENSP00  |      |    |       |       |   |     |       |       |         |          |        |            |
|   | metas | metastatic    | 516     | OR  |                                               | 00002 | 0002598 | 43   | P/ | Cct/T | rs950 | 0 | 0.0 | 0     | 2.929 | high_im | low_imp  | -0.987 | low_impact |
|   |       |               |         |     |                                               |       |         |      | S  | ct    | 1057  |   | 36  |       |       | pact    | ct       |        |            |

|   |       |               |         |     |                                             |       |         |      |    |       |       |   |     |       |       |         |        |          |             |
|---|-------|---------------|---------|-----|---------------------------------------------|-------|---------|------|----|-------|-------|---|-----|-------|-------|---------|--------|----------|-------------|
|   | tases | tumor         |         | S1C |                                             | 59881 | 81      |      |    |       |       |   |     |       |       |         |        |          |             |
|   |       |               |         | 1   |                                             |       |         |      |    |       |       |   |     |       |       |         |        |          |             |
| 2 | Prima | Common in     |         | PS  |                                             | ENST0 | ENSP00  |      |    |       |       |   |     |       |       |         |        |          |             |
|   | ry    | primary and   | 6:31105 | OR  | psoriasis susceptibility 1 candidate 2      | 00002 | 0002598 | 51   | G/ | Ggt/  | rs223 | 0 | 0.1 | 1.04  | 2.064 | high_im | -0.181 | low_imp  | 0.049       |
|   | tumor | metastatic    | 988     | S1C |                                             | 59845 | 45      |      | S  | Agt   | 3951  | 0 | 79  |       |       | pact    |        | ct       | low_impact  |
|   |       | tumors        |         | 2   |                                             |       |         |      |    |       |       |   |     |       |       |         |        |          |             |
| 2 | Liver | Common in     |         | PS  |                                             | ENST0 | ENSP00  |      |    |       |       |   |     |       |       |         |        |          |             |
|   | metas | primary and   | 6:31105 | OR  | psoriasis susceptibility 1 candidate 2      | 00002 | 0002598 | 51   | G/ | Ggt/  | rs223 | 0 | 0.1 | 1.04  | 2.064 | high_im | -0.181 | low_imp  | 0.049       |
|   | tases | metastatic    | 988     | S1C |                                             | 59845 | 45      |      | S  | Agt   | 3951  | 0 | 79  |       |       | pact    |        | ct       | low_impact  |
|   |       | tumors        |         | 2   |                                             |       |         |      |    |       |       |   |     |       |       |         |        |          |             |
| 2 | Prima | Private in    | 3:47453 | PTP | protein tyrosine phosphatase, non-receptor  | ENST0 | ENSP00  |      |    |       |       |   |     |       |       |         |        |          |             |
|   | ry    | primary tumor | 783     | N23 | type 23                                     | 00002 | 0002655 | 1397 | G/ | Ggc/  | -     | . | 1   | 4.285 | 1.119 | mediu   |        | high_imp |             |
|   | tumor |               |         |     |                                             | 65562 | 62      |      | C  | Tgc   |       | 0 |     |       |       | m_imp   | 2.005  | ct       | 3.326       |
|   |       |               |         |     |                                             |       |         |      |    |       |       | 1 |     |       |       | act     |        |          | high_impact |
| 2 | Prima | Common in     |         |     |                                             | ENST0 | ENSP00  |      |    |       |       |   |     |       |       |         |        |          |             |
|   | ry    | primary and   | 15:9361 | RG  | RGM domain family, member A                 | 00005 | 0004400 | 4    | L/ | cTg/c | rs459 | 0 | 0   | NA    | 2.929 | high_im | -1.667 | low_imp  | NA          |
|   | tumor | metastatic    | 6975    | MA  |                                             | 42321 | 25      |      | P  | Cg    | 8860  | 0 |     |       |       | pact    |        | ct       | NA          |
|   |       | tumors        |         |     |                                             |       |         |      |    |       |       |   |     |       |       |         |        |          | NA          |
| 2 | Liver | Common in     |         |     |                                             | ENST0 | ENSP00  |      |    |       |       |   |     |       |       |         |        |          |             |
|   | metas | primary and   | 15:9361 | RG  | RGM domain family, member A                 | 00005 | 0004400 | 4    | L/ | cTg/c | rs459 | 0 | 0   | NA    | 2.929 | high_im | -1.667 | low_imp  | NA          |
|   | tases | metastatic    | 6975    | MA  |                                             | 42321 | 25      |      | P  | Cg    | 8860  | 0 |     |       |       | pact    |        | ct       | NA          |
|   |       | tumors        |         |     |                                             |       |         |      |    |       |       |   |     |       |       |         |        |          | NA          |
| 2 | Prima | Common in     |         |     |                                             | ENST0 | ENSP00  |      |    |       |       |   |     |       |       |         |        |          |             |
|   | ry    | primary and   | 6:11765 | RO  | c-ros oncogene 1 , receptor tyrosine kinase | 00003 | 0003574 | 1776 | D/ | Gat/  | rs126 | . | 0.9 | NA    | 0.379 | mediu   |        | high_imp |             |
|   | tumor | metastatic    | 0532    | S1  |                                             | 68508 | 94      |      | H  | Cat   | 64076 | 0 | 97  |       |       | m_imp   | 1.632  | ct       | NA          |
|   |       | tumors        |         |     |                                             |       |         |      |    |       |       | 7 |     |       |       | act     |        |          | NA          |
| 2 | Liver | Common in     |         |     |                                             | ENST0 | ENSP00  |      |    |       |       |   |     |       |       |         |        |          |             |
|   | metas | primary and   | 6:11765 | RO  | c-ros oncogene 1 , receptor tyrosine kinase | 00004 | 0003846 | 83   | D/ | Gat/  | rs126 | . | 1   | NA    | 0.936 | mediu   |        | high_imp |             |
|   | tases | metastatic    | 0532    | S1  |                                             | 03284 | 47      |      | H  | Cat   | 64076 | 0 |     |       |       | m_imp   | 1.904  | ct       | NA          |
|   |       | tumors        |         |     |                                             |       |         |      |    |       |       | 2 |     |       |       | act     |        |          | NA          |

|   |                  |                                         |                 |                 |                                                                             |                         |                         |     |         |             |                     |              |           |       |                 |                   |             |                   |             |               |
|---|------------------|-----------------------------------------|-----------------|-----------------|-----------------------------------------------------------------------------|-------------------------|-------------------------|-----|---------|-------------|---------------------|--------------|-----------|-------|-----------------|-------------------|-------------|-------------------|-------------|---------------|
| 2 | Liver metastases | Private in metastatic tumor             | 1:26142<br>180  | SEP<br>N1       |                                                                             | ENST0<br>00003<br>74315 | ENSP00<br>0003634<br>34 | 548 | R/<br>W | Cgg/<br>Tgg | -<br>-              | 0<br>0       | 0.9<br>88 | NA    | 2.064           | high_im<br>pact   | 1.291       | medium_i<br>mpact | NA          | NA            |
| 2 | Primary tumor    | Private in primary tumor                | 11:4060<br>59   | SIGI<br>RR      | single immunoglobulin and toll-interleukin 1 receptor (TIR) domain          | ENST0<br>00004<br>31843 | ENSP00<br>0004031<br>04 | 357 | G/<br>A | gGt/g<br>Ct | -<br>-              | 0<br>98      | 0.9<br>98 | 1.905 | 2.048           | high_im<br>pact   | 1.783       | high_impact       | 1.104       | medium_impact |
| 2 | Primary tumor    | Private in primary tumor                | 15:4852<br>7152 | SLC<br>12A<br>1 | solute carrier family 12 (sodium/potassium/chloride transporters), member 1 | ENST0<br>00003<br>80993 | ENSP00<br>0003703<br>81 | 389 | P/<br>L | cCa/<br>cTa | -<br>-              | 0<br>1       | 1<br>4.14 | 2.219 | high_im<br>pact | 1.659             | high_impact | 3.154             | high_impact |               |
| 2 | Liver metastases | Private in metastatic tumor             | X:73751<br>224  | SLC<br>16A<br>2 | solute carrier family 16, member 2 (monocarboxylic acid transporter 8)      | ENST0<br>00002<br>76033 | ENSP00<br>0002760<br>33 | 560 | P/<br>A | Ccc/<br>Gcc | -<br>-              | 0<br>3<br>6  | 0.9<br>99 | NA    | -0.47<br>7      | low_im<br>pact    | 1.825       | high_impact       | NA          | NA            |
| 2 | Primary tumor    | Private in primary tumor                | 22:3148<br>6802 | SM<br>TN        | smoothelin                                                                  | ENST0<br>00003<br>33137 | ENSP00<br>0003295<br>32 | 292 | G/<br>R | Gga/<br>Cga | -<br>-              | 0<br>02      | 0.0<br>02 | NA    | 2.062           | high_im<br>pact   | -1.314      | low_impact        | NA          | NA            |
| 2 | Primary tumor    | Common in primary and metastatic tumors | 12:5749<br>9285 | STA<br>T6       | signal transducer and activator of transcription 6, interleukin-4 induced   | ENST0<br>00003<br>00134 | ENSP00<br>0003001<br>34 | 260 | R/<br>W | Cgg/<br>Tgg | -<br>-              | 0<br>0<br>4  | 0.9<br>98 | 0.895 | 0.581           | mediu<br>m_impact | 1.688       | high_impact       | -0.261      | low_impact    |
| 2 | Liver metastases | Common in primary and metastatic tumors | 12:5749<br>9285 | STA<br>T6       | signal transducer and activator of transcription 6, interleukin-4 induced   | ENST0<br>00005<br>35201 | ENSP00<br>0004410<br>02 | 150 | R/<br>W | Cgg/<br>Tgg | -<br>-              | 0<br>0<br>98 | 0.9<br>98 | NA    | 2.119           | high_im<br>pact   | 1.688       | high_impact       | NA          | NA            |
| 2 | Primary tumor    | Common in primary and metastatic tumors | 6:33281<br>576  | TAP<br>BP       | TAP binding protein (tapasin)                                               | ENST0<br>00004<br>34618 | ENSP00<br>0003957<br>01 | 35  | G/<br>R | Gga/<br>Aga | rs117<br>39474<br>2 | 0<br>0<br>26 | 0.1<br>26 | NA    | 2.062           | high_im<br>pact   | -0.268      | low_impact        | NA          | NA            |
| 2 | Liver metastases | Common in primary and                   | 6:33281<br>576  | TAP<br>BP       | TAP binding protein (tapasin)                                               | ENST0<br>00004          | ENSP00<br>0004048       | 35  | G/<br>R | Gga/<br>Aga | rs117<br>39474      | 0<br>19      | 0.5<br>19 | NA    | 2.062           | high_im<br>pact   | 0.224       | medium_i<br>mpact | NA          | NA            |



|   |       |               |         |     |                                               |       |         |     |    |       |       |   |     |       |       |         |        |               |
|---|-------|---------------|---------|-----|-----------------------------------------------|-------|---------|-----|----|-------|-------|---|-----|-------|-------|---------|--------|---------------|
|   | tases | metastatic    |         |     |                                               | 26633 | 33      |     |    | 2     |       |   |     |       |       |         |        |               |
|   |       | tumors        |         |     |                                               |       |         |     |    |       |       |   |     |       |       |         |        |               |
|   | Prima | Common in     |         |     |                                               | ENST0 | ENSP00  |     |    |       |       |   |     |       |       |         |        |               |
| 2 | ry    | primary and   | 11:6740 | TBX | T-box 10                                      | 00003 | 0003351 | 101 | K/ | aAg/  | rs375 | 0 | 0.9 | 1.605 | 2.008 | high_im | 0.995  | medium_i      |
|   | tumor | metastatic    | 2362    | 10  |                                               |       |         |     | T  | aCg   | 8938  | 0 | 51  |       |       | pact    | 0.646  | low_impact    |
|   |       | tumors        |         |     |                                               | 35385 | 91      |     |    |       |       |   |     |       |       |         |        |               |
|   | Liver | Common in     |         |     |                                               | ENST0 | ENSP00  |     |    |       |       |   |     |       |       |         |        |               |
| 2 | metas | primary and   | 11:6740 | TBX | T-box 10                                      | 00003 | 0003351 | 101 | K/ | aAg/  | rs375 | 0 | 0.9 | 1.605 | 2.008 | high_im | 0.995  | medium_i      |
|   | tases | metastatic    | 2362    | 10  |                                               |       |         |     | T  | aCg   | 8938  | 0 | 51  |       |       | pact    | 0.646  | low_impact    |
|   |       | tumors        |         |     |                                               | 35385 | 91      |     |    |       |       |   |     |       |       |         |        |               |
|   | Prima | Private in    | 18:4455 | TCE | transcription elongation factor B polypeptide | ENST0 | ENSP00  |     |    |       |       |   |     |       |       |         |        |               |
| 2 | ry    | primary tumor | 5312    | B3C | 3C (elongin A3)                               | 00003 | 0003282 | 301 | S/ | tCc/t | rs765 | 0 | 0.9 | 1.1   | 2.174 | high_im | 1.052  | medium_i      |
|   | tumor |               |         |     |                                               | 30682 | 32      |     | C  | Gc    | 39063 | 0 | 4   |       |       | pact    | -0.075 | low_impact    |
|   | Liver | Private in    |         |     |                                               | ENST0 | ENSP00  |     |    |       |       |   |     |       |       |         |        |               |
| 2 | metas | metastatic    | 17:6722 | TEK | tektin 1                                      | 00003 | 0003413 | 116 | L/ | cTg/c | -     | 0 | 1   | 2.955 | 2.929 | high_im | 1.787  | highimpa      |
|   | tases | tumor         | 521     | T1  |                                               |       |         |     | Q  | Ag    | -     | 0 | 1   |       |       | pact    | 2.247  | medium_impact |
|   |       |               |         |     |                                               | 38694 | 46      |     |    |       |       |   |     |       |       |         |        |               |
|   | Prima | Private in    | 9:35852 | TM  |                                               | ENST0 | ENSP00  |     |    |       |       | 0 |     |       |       | mediu   |        |               |
| 2 | ry    | primary tumor | 947     | EM8 | transmembrane protein 8B                      | 00003 | 0003672 | 315 | R/ | Cgt/T | -     | 0 | 0.9 | 2.665 | 1.137 | m_imp   | 1.894  | highimpa      |
|   | tumor |               |         | B   |                                               | 77988 | 27      |     | C  | gt    | -     | 0 | 99  |       |       | act     | 1.728  | medium_impact |
|   |       |               |         |     |                                               |       |         |     |    |       |       | 1 |     |       |       |         |        |               |
|   | Prima | Common in     |         |     |                                               | ENST0 | ENSP00  |     |    |       |       |   |     |       |       |         |        |               |
| 2 | ry    | primary and   | 17:7577 | TP5 | tumor protein p53                             | 00002 | 0002693 | 266 | G/ | gGa/  | COS   | 0 | 1   | 3.3   | 2.265 | high_im | 2.147  | highimpa      |
|   | tumor | metastatic    | 141     | 3   |                                               |       |         |     | E  | gAa   | M108  | 0 | 1   |       |       | pact    | 4.679  | high_impact   |
|   |       | tumors        |         |     |                                               | 69305 | 05      |     |    |       | 67    |   |     |       |       |         |        |               |
|   | Liver | Common in     |         |     |                                               | ENST0 | ENSP00  |     |    |       |       |   |     |       |       |         |        |               |
| 2 | metas | primary and   | 17:7577 | TP5 | tumor protein p53                             | 00005 | 0004251 | 134 | G/ | gGa/  | COS   | 0 | 1   | NA    | 2.265 | high_im | 2.147  | highimpa      |
|   | tases | metastatic    | 141     | 3   |                                               |       |         |     | E  | gAa   | M108  | 0 | 1   |       |       | pact    | NA     | NA            |
|   |       | tumors        |         |     |                                               | 09690 | 04      |     |    |       | 67    |   |     |       |       |         |        |               |
|   | Prima | Common in     | 11:5730 | TRI | tripartite motif containing 22                | ENST0 | ENSP00  |     |    |       |       |   |     |       |       |         |        |               |
| 2 | ry    | primary and   | 715     | M22 |                                               | 00005 | 0004443 | 256 | V/ | gTt/g | -     | 0 | 0.9 | NA    | 2.344 | high_im | 0.789  | medium_i      |
|   |       |               |         |     |                                               |       |         |     | D  | At    | -     | 0 | 19  |       |       | pact    | NA     | NA            |

|   |        |             |         |     |                                             |       |         |      |    |       |       |   |     |       |       |         |       |          |      |            |
|---|--------|-------------|---------|-----|---------------------------------------------|-------|---------|------|----|-------|-------|---|-----|-------|-------|---------|-------|----------|------|------------|
|   | tumor  | metastatic  |         |     |                                             | 45338 | 78      |      |    |       |       |   |     |       |       |         |       |          |      |            |
|   |        | tumors      |         |     |                                             |       |         |      |    |       |       |   |     |       |       |         |       |          |      |            |
|   | Liver  | Common in   |         |     |                                             | ENST0 | ENSP00  |      |    |       |       |   |     |       |       |         |       |          |      |            |
| 2 | metas  | primary and | 11:5730 | TRI |                                             | 00004 | 0004128 | 367  | V/ | gTt/g | -     | 0 | 0.6 | NA    | 2.344 | high_im | 0.324 | medium_i | NA   | NA         |
|   | tases  | metastatic  | 715     | M22 | tripartite motif containing 22              |       |         |      | D  | At    |       |   |     |       |       | pact    |       | mpact    |      |            |
|   | tumors | tumors      |         |     |                                             | 55293 | 45      |      |    |       |       |   |     |       |       |         |       |          |      |            |
|   | Prima  | Common in   |         |     |                                             | ENST0 | ENSP00  |      |    |       |       |   |     |       |       |         |       |          |      |            |
| 2 | ry     | primary and | 7:98550 | TRR | transformation/transcription                | 00003 | 0003477 | 1822 | V/ | gTg/  | -     | 0 | 0.9 | NA    | 1.837 | mediu   |       | high_imp | NA   | NA         |
|   | tumor  | metastatic  | 866     | AP  | domain-associated protein                   |       |         |      | G  | gGg   |       |   |     |       |       | m_imp   | 1.904 | ct       |      |            |
|   | tumors | tumors      |         |     |                                             | 55540 | 33      |      |    |       |       |   |     |       |       | act     |       |          |      |            |
|   | Liver  | Common in   |         |     |                                             | ENST0 | ENSP00  |      |    |       |       |   |     |       |       |         |       |          |      |            |
| 2 | metas  | primary and | 7:98550 | TRR | transformation/transcription                | 00004 | 0003946 | 1562 | V/ | gTg/  | -     | 0 | 0.9 | NA    | 1.837 | mediu   |       | high_imp | NA   | NA         |
|   | tases  | metastatic  | 866     | AP  | domain-associated protein                   |       |         |      | G  | gGg   |       |   |     |       |       | m_imp   | 1.563 | ct       |      |            |
|   | tumors | tumors      |         |     |                                             | 56197 | 45      |      |    |       |       |   |     |       |       | act     |       |          |      |            |
|   | Prima  | Common in   |         |     |                                             | ENST0 | ENSP00  |      |    |       |       |   |     |       |       |         |       |          |      |            |
| 2 | ry     | primary and | 6:99956 | USP | ubiquitin specific peptidase 45             | 00005 | 0004243 | 67   | K/ | Aaa/  | rs774 | . | 0.9 | NA    | -0.64 | low_im  |       | high_imp | NA   | NA         |
|   | tumor  | metastatic  | 560     | 45  |                                             |       |         |      | E  | Gaa   | 4845  | 4 | 99  |       |       | pact    | 1.858 | ct       |      |            |
|   | tumors | tumors      |         |     |                                             | 00704 | 72      |      |    |       |       |   |     |       |       |         |       |          |      |            |
|   | Liver  | Common in   |         |     |                                             | ENST0 | ENSP00  |      |    |       |       |   |     |       |       |         |       |          |      |            |
| 2 | metas  | primary and | 6:99956 | USP | ubiquitin specific peptidase 45             | 00005 | 0004243 | 67   | K/ | Aaa/  | rs774 | . | 0.9 | NA    | -0.64 | low_im  |       | high_imp | NA   | NA         |
|   | tases  | metastatic  | 560     | 45  |                                             |       |         |      | E  | Gaa   | 4845  | 4 | 99  |       |       | pact    | 1.858 | ct       |      |            |
|   | tumors | tumors      |         |     |                                             | 00704 | 72      |      |    |       |       |   |     |       |       |         |       |          |      |            |
|   | Prima  | Common in   |         |     |                                             | ENST0 | ENSP00  |      |    |       |       |   |     |       |       |         |       |          |      |            |
| 2 | ry     | primary and | 1:13724 | VW  | von Willebrand factor A domain containing 1 | 00004 | 0004171 | 56   | F/ | tTt/t | -     | 0 | 1   | 3.715 | 2.062 | high_im |       | high_imp | 2.83 | medium_imp |
|   | tumor  | metastatic  | 00      | A1  |                                             |       |         |      | C  | Gt    |       |   |     |       |       | pact    | 1.894 | ct       |      | act        |
|   | tumors | tumors      |         |     |                                             | 76993 | 85      |      |    |       |       |   |     |       |       |         |       |          |      |            |
|   | Liver  | Common in   |         |     |                                             | ENST0 | ENSP00  |      |    |       |       |   |     |       |       |         |       |          |      |            |
| 2 | metas  | primary and | 1:13724 | VW  | von Willebrand factor A domain containing 1 | 00004 | 0004171 | 56   | F/ | tTt/t | -     | 0 | 1   | 3.715 | 2.062 | high_im |       | high_imp | 2.83 | medium_imp |
|   | tases  | metastatic  | 00      | A1  |                                             |       |         |      | C  | Gt    |       |   |     |       |       | pact    | 1.894 | ct       |      | act        |
|   | tumors | tumors      |         |     |                                             | 76993 | 85      |      |    |       |       |   |     |       |       |         |       |          |      |            |

|   |                  |                                         |                 |                 |                                                              |                         |                         |     |         |             |                |         |           |                |               |       |               |        |               |
|---|------------------|-----------------------------------------|-----------------|-----------------|--------------------------------------------------------------|-------------------------|-------------------------|-----|---------|-------------|----------------|---------|-----------|----------------|---------------|-------|---------------|--------|---------------|
| 2 | Primary tumor    | Common in primary and metastatic tumors | 7:73275<br>565  | WB<br>SC<br>R28 | Williams-Beuren syndrome chromosome region 28                | ENST0<br>00003<br>20531 | ENSP00<br>0003167<br>75 | 14  | I/<br>N | aTc/<br>aAc | rs117<br>70052 | 0<br>18 | 0.0<br>18 | 0.805<br>2.929 | high_impact   | -0.94 | low_impact    | -0.106 | low_impact    |
| 2 | Liver metastases | Common in primary and metastatic tumors | 7:73275<br>565  | WB<br>SC<br>R28 | Williams-Beuren syndrome chromosome region 28                | ENST0<br>00003<br>20531 | ENSP00<br>0003167<br>75 | 14  | I/<br>N | aTc/<br>aAc | rs117<br>70052 | 0<br>18 | 0.0<br>18 | 0.805<br>2.929 | high_impact   | -0.94 | low_impact    | -0.106 | low_impact    |
| 2 | Primary tumor    | Common in primary and metastatic tumors | 15:5390<br>1720 | WD<br>R72       | WD repeat domain 72                                          | ENST0<br>00003<br>96328 | ENSP00<br>0003796<br>19 | 981 | Q/<br>R | cAg/<br>cGg | -<br>-         | 0<br>53 | 0.9<br>53 | 1.955<br>2.062 | high_impact   | 0.941 | medium_impact | 0.984  | low_impact    |
| 2 | Liver metastases | Common in primary and metastatic tumors | 15:5390<br>1720 | WD<br>R72       | WD repeat domain 72                                          | ENST0<br>00003<br>60509 | ENSP00<br>0003536<br>99 | 981 | Q/<br>R | cAg/<br>cGg | -<br>-         | 0<br>53 | 0.9<br>53 | 1.955<br>2.062 | high_impact   | 0.941 | medium_impact | 0.984  | low_impact    |
| 2 | Liver metastases | Private in metastatic tumor             | 2:16013<br>2089 | WD<br>SUB<br>1  | WD repeat, sterile alpha motif and U-box domain containing 1 | ENST0<br>00004<br>09124 | ENSP00<br>0003868<br>91 | 215 | K/<br>T | aAa/<br>aCa | rs168<br>43852 | .<br>0  | 0.9<br>94 | NA<br>0.863    | medium_impact | 1.595 | high_impact   | NA     | NA            |
| 2 | Liver metastases | Private in metastatic tumor             | 9:13151<br>5573 | ZER<br>1        | zer-1 homolog (C. elegans)                                   | ENST0<br>00002<br>91900 | ENSP00<br>0002919<br>00 | 206 | L/<br>V | Ctc/<br>Gtc | -<br>-         | 0<br>58 | 0.9<br>58 | 1.82<br>2.11   | high_impact   | 1.091 | medium_impact | 0.917  | low_impact    |
| 2 | Liver metastases | Private in metastatic tumor             | 19:2121<br>6348 | ZNF<br>430      | zinc finger protein 430                                      | ENST0<br>00002<br>61560 | ENSP00<br>0002615<br>60 | 61  | R/<br>S | agA/<br>agT | -<br>-         | 0<br>6  | 0.4<br>6  | 3.31<br>2.084  | high_impact   | 0.214 | medium_impact | 2.083  | medium_impact |
| 2 | Liver metastases | Private in metastatic tumor             | 7:14946<br>2789 | ZNF<br>467      | zinc finger protein 467                                      | ENST0<br>00003<br>02017 | ENSP00<br>0003047<br>69 | 268 | G/<br>S | Ggc/<br>Agc | -<br>-         | 0<br>94 | 0.9<br>94 | 1.785<br>1.14  | medium_impact | 1.55  | high_impact   | 0.772  | low_impact    |

|   |                  |                             |              |          |                                                            |               |            |     |         |            |   |     |       |       |             |                |               |             |               |            |
|---|------------------|-----------------------------|--------------|----------|------------------------------------------------------------|---------------|------------|-----|---------|------------|---|-----|-------|-------|-------------|----------------|---------------|-------------|---------------|------------|
| 2 | Liver metastases | Private in metastatic tumor | 7:99161576   | ZNF655   | zinc finger protein 655                                    | ENST000003223 | ENSP00147  | E/V | gAa/gTa | -          | 0 | 0.9 | NA    | 2.064 | high_impact | 0.955          | medium_impact | NA          | NA            |            |
| 3 | Primary tumor    | Private in primary tumor    | 12:125603262 | AACS     | acetoacetyl-CoA synthetase                                 | ENST000002616 | ENSP00358  | P/S | Ccc/Tcc | -          | 0 | 0.9 | NA    | 2.04  | high_impact | 1.922          | high_impact   | NA          | NA            |            |
| 3 | Liver metastases | Private in metastatic tumor | 5:64595955   | ADAMMTS6 | ADAM metalloproteinase with thrombospondin type 1 motif, 6 | ENST000004235 | ENSP00409  | F/L | ttT/ttG | -          | 0 | 0.9 | NA    | 2.174 | high_impact | 1.687          | high_impact   | NA          | NA            |            |
| 3 | Liver metastases | Private in metastatic tumor | 20:853752    | ANGPT4   | angiopoietin 4                                             | ENST000003713 | ENSP00455  | D/Y | Gac/Tac | -          | 0 | 0   | 1     | 2.105 | 0.423       | mediu_m_impact | 1.767         | high_impact | 0.964         | low_impact |
| 3 | Primary tumor    | Private in primary tumor    | 19:33137427  | ANKRD27  | ankyrin repeat domain 27 (VPS9 domain)                     | ENST000003042 | ENSP00103  | E/V | gAa/gTa | -          | 0 | 0.9 | 2.045 | 2.112 | high_impact | 1.448          | medium_impact | 1.158       | medium_impact |            |
| 3 | Primary tumor    | Private in primary tumor    | 19:1469239   | APC2     | adenomatosis polyposis coli 2                              | ENST000004429 | ENSP001980 | S/Y | tCc/tAc | -          | 0 | 0.9 | NA    | 0.657 | m_impact    | 1.674          | high_impact   | NA          | NA            |            |
| 3 | Liver metastases | Private in metastatic tumor | X:138878526  | ATP11C   | ATPase, class VI, type 11C                                 | ENST000003527 | ENSP00374  | S/F | tCc/tTc | -          | 0 | 0.9 | NA    | 2.189 | high_impact | 1.465          | medium_impact | NA          | NA            |            |
| 3 | Primary tumor    | Private in primary tumor    | 2:71163086   | ATP6V1B1 | ATPase, H+ transporting, lysosomal 56/58kDa, V1 subunit B1 | ENST000004051 | ENSP001    | M/T | aTg/aCg | rs11681642 | 0 | 0.2 | NA    | 2.106 | high_impact | 0.435          | medium_impact | NA          | NA            |            |
| 3 | Primary tumor    | Private in primary tumor    | X:77268383   | ATP7A    | ATPase, Cu++ transporting, alpha polypeptide               | ENST000003457 | ENSP00727  | G/V | gGa/gTa | -          | 0 | 0.9 | 1.515 | 2.025 | high_impact | 0.637          | medium_impact | -0.238      | low_impact    |            |
| 3 | Primary tumor    | Private in primary tumor    | 14:9964      | BCL11B   | B-cell CLL/lymphoma 11B (zinc finger protein)              | ENST000003000 | ENSP00133  | P/  | Ccg/    | -          | 0 | 0.9 | NA    | 2.776 | high_impact | 0.8            | medium_impact | NA          | NA            |            |

|   |        |               |         |      |                                             |       |         |      |     |       |       |   |     |       |       |         |        |          |       |             |
|---|--------|---------------|---------|------|---------------------------------------------|-------|---------|------|-----|-------|-------|---|-----|-------|-------|---------|--------|----------|-------|-------------|
|   | ry     | primary tumor | 2194    | 11B  |                                             | 00004 | 0003874 |      | T   | Acg   |       |   | 2   |       |       | pact    |        | mpact    |       |             |
|   | tumor  |               |         |      |                                             | 43726 | 19      |      |     |       |       |   |     |       |       |         |        |          |       |             |
| 3 | Prima  | Private in    | 16:6650 | BEA  | brain expressed, associated with NEDD4, 1   | ENST0 | ENSP00  |      | R/  | Cgg/  |       |   | 0.9 |       |       | high_im |        | medium_i |       |             |
|   | ry     | primary tumor | 3684    | N1   |                                             | 00005 | 0004427 | 69   | W   | Tgg   | -     | 0 | 75  | NA    | 2.062 | pact    | 1.101  | mpact    | NA    | NA          |
|   | tumor  |               |         |      |                                             | 36005 | 93      |      |     |       |       |   |     |       |       |         |        |          |       |             |
| 3 | Prima  | Private in    | 17:4122 | BR   | breast cancer 1, early onset                | ENST0 | ENSP00  |      | G/  | gGc/  | rs803 | . | 0.9 |       |       | low_im  |        | high_imp |       |             |
|   | ry     | primary tumor | 2964    | CA1  |                                             | 00003 | 0003122 | 514  | A   | gCc   | 57414 | 1 | 99  | NA    | 8     | pact    | 2.005  | ct       | NA    | NA          |
|   | tumor  |               |         |      |                                             | 52993 | 36      |      |     |       |       |   | 5   |       |       |         |        |          |       |             |
| 3 | Prima  | Common in     |         |      |                                             | ENST0 | ENSP00  |      |     |       |       |   |     |       |       |         |        |          |       |             |
|   | ry     | primary and   | 11:8262 | C11  |                                             | 00005 | 0004312 | 12   | V/I | Gta/  | rs619 | 0 | 0.0 |       |       | high_im |        | low_imp  |       |             |
|   | tumor  | metastatic    | 5814    | orf8 | chromosome 11 open reading frame 82         | 00005 | 0004312 | 12   |     | Ata   | 02276 | 0 | 03  | NA    | 2.929 | pact    | -1.392 | ct       | NA    | NA          |
|   | tumors |               |         | 2    |                                             | 28759 | 34      |      |     |       |       |   |     |       |       |         |        |          |       |             |
| 3 | Liver  | Common in     |         |      |                                             | ENST0 | ENSP00  |      |     |       |       |   |     |       |       |         |        |          |       |             |
|   | metas  | primary and   | 11:8262 | C11  |                                             | 00005 | 0004312 | 12   | V/I | Gta/  | rs619 | 0 | 0.0 |       |       | high_im |        | low_imp  |       |             |
|   | tases  | metastatic    | 5814    | orf8 | chromosome 11 open reading frame 82         | 00005 | 0004312 | 12   |     | Ata   | 02276 | 0 | 03  | NA    | 2.929 | pact    | -1.392 | ct       | NA    | NA          |
|   | tumors |               |         | 2    |                                             | 28759 | 34      |      |     |       |       |   |     |       |       |         |        |          |       |             |
| 3 | Liver  | Private in    | 4:14020 | C4o  | chromosome 4 open reading frame 49          | ENST0 | ENSP00  |      | R/  | aGg/  |       |   | 0.9 |       |       | high_im |        | medium_i |       |             |
|   | metas  | metastatic    | 1266    | rf49 |                                             | 00003 | 0003819 | 16   | T   | aCg   | -     | 0 | 55  | 1.905 | 2.929 | pact    | 0.824  | mpact    | 1.098 | medium_imp  |
|   | tases  | tumor         |         |      |                                             | 98955 | 28      |      |     |       |       |   |     |       |       |         |        |          |       |             |
| 3 | Liver  | Private in    | 17:4869 | CA   | calcium channel, voltage-dependent, T type, | ENST0 | ENSP00  |      | R/  | Cgc/  |       |   | 0   | 1     |       | high_im |        | high_imp |       |             |
|   | metas  | metastatic    | 4902    | CN   | alpha 1G subunit                            | 00005 | 0004265 | 1668 | C   | Tgc   | -     | 0 | 1   | NA    | 2.574 | pact    | 1.829  | ct       | NA    | NA          |
|   | tases  | tumor         |         | A1G  |                                             | 03607 | 58      |      |     |       |       |   |     |       |       |         |        |          |       |             |
| 3 | Prima  | Common in     |         |      |                                             | ENST0 | ENSP00  |      |     |       |       |   | 0   |       |       |         |        | mediu    |       |             |
|   | ry     | primary and   | 16:1245 | CA   | calcium channel, voltage-dependent, T type, | 00003 | 0003341 | 196  | S/  | tCg/t |       | . | 0.9 |       |       |         |        | medium_i |       |             |
|   | tumor  | metastatic    | 967     | CN   | alpha 1H subunit                            | 00003 | 0003341 | 196  | L   | Tg    | -     | 0 | 54  | 2.525 | 0.983 | m_imp   | 0.92   | mpact    | 3.134 | high_impact |
|   | tumors |               |         | A1H  |                                             | 48261 | 98      |      |     |       |       |   | 2   |       |       |         |        |          |       |             |
| 3 | Liver  | Common in     | 16:1245 | CA   | calcium channel, voltage-dependent, T type, | ENST0 | ENSP00  |      | S/  | tCg/t |       |   | 0.9 |       |       | high_im |        | medium_i |       |             |
|   | metas  | primary and   | 967     | CN   | alpha 1H subunit                            | 00003 | 0003514 | 196  | L   | Tg    | -     | 0 | 93  | NA    | 2.574 | pact    | 1.371  | mpact    | NA    | NA          |
|   | tases  | metastatic    |         | A1H  |                                             | 58590 | 01      |      |     |       |       |   |     |       |       |         |        |          |       |             |

| tumors |       |               |         |     |                                               |       |         |      |     |       |       |   |     |     |       |         |        |          |        |            |
|--------|-------|---------------|---------|-----|-----------------------------------------------|-------|---------|------|-----|-------|-------|---|-----|-----|-------|---------|--------|----------|--------|------------|
| 3      | Liver | Private in    | 16:8895 | CBF | core-binding factor, runt domain, alpha       | ENST0 | ENSP00  |      |     |       |       |   |     |     |       |         |        |          |        |            |
|        | metas | metastatic    | 8689    | A2T | subunit 2                                     | 00003 | 0003321 | 109  | I/S | aTt/a | -     | 0 | 0.1 | NA  | 2.066 | high_im | -0.301 | low_imp  | NA     | NA         |
|        | tases | tumor         |         | 3   |                                               | 27483 | 22      |      |     | Gt    |       |   | 06  |     | pact  |         | ct     |          |        |            |
|        |       |               |         |     |                                               |       |         |      |     |       |       | 0 |     |     |       |         |        |          |        |            |
| 3      | Prima | Private in    | 21:3044 | CCT | chaperonin containing TCP1, subunit 8 (theta) | ENST0 | ENSP00  |      |     |       |       |   |     |     |       | mediu   |        | high_imp | NA     | NA         |
|        | ry    | primary tumor | 0008    | 8   |                                               | 00005 | 0004427 | 11   | K/  | Aaa/  | -     | . | 0.9 | NA  | 0.826 | m_imp   | 1.968  | ct       |        |            |
|        | tumor |               |         |     |                                               | 40844 | 30      |      | Q   | Caa   |       | 0 | 99  |     | act   |         |        |          |        |            |
|        |       |               |         |     |                                               |       |         |      |     |       |       | 2 |     |     |       |         |        |          |        |            |
|        |       |               |         |     |                                               |       |         |      |     |       |       | 0 |     |     |       |         |        |          |        |            |
| 3      | Liver | Private in    | 15:4904 | CEP | centrosomal protein 152kDa                    | ENST0 | ENSP00  |      |     |       |       |   |     |     |       | mediu   |        | high_imp | NA     | NA         |
|        | metas | metastatic    | 8668    | 152 |                                               | 00003 | 0003703 | 926  | E/  | gAa/  | rs117 | . | 0.9 | NA  | 0.859 | m_imp   | 1.829  | ct       |        |            |
|        | tases | tumor         |         |     |                                               | 80950 | 37      |      | V   | gTa   | 55782 | 0 | 98  |     | act   |         |        |          |        |            |
|        |       |               |         |     |                                               |       |         |      |     |       | 9     | 0 | 2   |     |       |         |        |          |        |            |
| 3      | Liver | Private in    | 11:1172 | DS  | Down syndrome cell adhesion molecule like 1   | ENST0 | ENSP00  |      |     |       |       |   |     |     |       | high_im |        | low_imp  | NA     | NA         |
|        | metas | metastatic    | 99270   | CA  |                                               | 00004 | 0003947 | 1746 | P/  | cCc/  |       | - | 0   | 0.0 | NA    | 2.052   | pact   | -1.182   | ct     |            |
|        | tases | tumor         |         | ML1 |                                               | 46508 | 95      |      | H   | cAc   |       |   | 03  |     |       |         |        |          |        |            |
| 3      | Prima | Private in    | 2:21627 | FN1 | fibronectin 1                                 | ENST0 | ENSP00  |      |     |       |       |   |     |     |       | mediu   |        | high_imp | NA     | NA         |
|        | ry    | primary tumor | 2908    |     |                                               | 00003 | 0002730 | 814  | P/  | cCt/c |       | - | 0   | 1   | NA    | 1.931   | m_imp  | 1.608    | ct     |            |
|        | tumor |               |         |     |                                               | 45488 | 49      |      | H   | At    |       |   |     |     |       | act     |        |          |        |            |
|        |       |               |         |     |                                               |       |         |      |     |       |       |   |     |     |       |         |        |          |        |            |
| 3      | Liver | Private in    | 8:11606 | GAT | GATA binding protein 4                        | ENST0 | ENSP00  |      |     |       |       |   |     |     |       | mediu   |        | high_imp | NA     | NA         |
|        | metas | metastatic    | 529     | A4  |                                               | 00005 | 0004353 | 34   | A/  | Gcc/  |       | - | .   | 0.9 | NA    | 0.816   | m_imp  | 1.615    | ct     |            |
|        | tases | tumor         |         |     |                                               | 26716 | 47      |      | T   | Acc   |       |   | 0   | 9   |       | act     |        |          |        |            |
|        |       |               |         |     |                                               |       |         |      |     |       |       |   | 4   |     |       |         |        |          |        |            |
| 3      | Liver | Private in    | 22:2502 | GG  | gamma-glutamyltransferase 1                   | ENST0 | ENSP00  |      |     |       |       |   |     |     |       | high_im |        | medium_i | NA     | NA         |
|        | metas | metastatic    | 4072    | T1  |                                               | 00004 | 0003850 | 110  | C/  | tGc/t |       | - | 0   | 0.8 | NA    | 2.489   | pact   | 1.486    | mpact  |            |
|        | tases | tumor         |         |     |                                               | 04920 | 01      |      | F   | Tc    |       |   | 45  |     |       |         |        |          |        |            |
| 3      | Liver | Private in    | 20:5743 | GN  | GNAS complex locus                            | ENST0 | ENSP00  |      |     |       |       |   |     |     |       | high_im |        | low_imp  | NA     | NA         |
|        | metas | metastatic    | 0029    | AS  |                                               | 00003 | 0003022 | 507  | P/  | Cca/  |       | - | 0   | 0.0 | NA    | 2.562   | pact   | -1.297   | ct     |            |
|        | tases | tumor         |         |     |                                               | 06120 | 37      |      | T   | Aca   |       |   | 03  |     |       |         |        |          |        |            |
| 3      | Liver | Private in    | 20:5743 | GN  | GNAS complex locus                            | ENST0 | ENSP00  |      |     |       |       |   |     |     |       | high_im |        | low_imp  | -0.535 | low_impact |
|        | metas | metastatic    | 0029    | AS  |                                               | 00003 | 0003601 | 570  | A/  | gCc/  |       | - | 0   | 0.0 | 1.1   | 2.562   | pact   | -0.443   | ct     |            |
|        |       |               |         |     |                                               |       |         |      | D   | gAc   |       |   | 74  |     |       |         |        |          |        |            |

|   |        |               |         |     |                                                |       |         |     |    |       |       |    |     |       |       |         |        |             |       |               |
|---|--------|---------------|---------|-----|------------------------------------------------|-------|---------|-----|----|-------|-------|----|-----|-------|-------|---------|--------|-------------|-------|---------------|
|   | tases  | tumor         |         |     |                                                | 71100 | 41      |     |    |       |       |    |     |       |       |         |        |             |       |               |
| 3 | Prima  | Private in    | 6:32713 | HLA | major histocompatibility complex, class II, DQ | ENST0 | ENSP00  |     |    |       |       |    |     |       | mediu |         |        |             |       |               |
|   | ry     | primary tumor | 619     | -DQ | alpha 2                                        | 00003 | 0003640 | 128 | P/ | cCc/  | -     | 0  | 1   | 2.605 | 1.629 | m_imp   | 2.165  | high_impact | 0.579 | low_impact    |
|   | tumor  |               |         | A2  |                                                | 74940 | 76      |     | H  | cAc   |       |    |     |       | act   |         |        |             |       |               |
| 3 | Liver  | Private in    | 6:32729 | HLA | major histocompatibility complex, class II, DQ | ENST0 | ENSP00  |     |    |       |       |    |     |       |       | high_im |        | medium_i    |       |               |
|   | metas  | metastatic    | 595     | -DQ | beta 2                                         | 00004 | 0004159 | 68  | D/ | gAc/  | -     | 0  | 0.9 | NA    | 2.062 | pact    | 1.305  | mpact       | NA    | NA            |
|   | tases  | tumor         |         | B2  |                                                | 27449 | 97      |     | V  | gTc   |       |    | 89  |       |       |         |        |             |       |               |
| 3 | Prima  | Private in    | 13:1104 | IRS | insulin receptor substrate 2                   | ENST0 | ENSP00  |     |    |       |       |    |     |       |       | high_im |        | medium_i    |       |               |
|   | ry     | primary tumor | 37122   | 2   |                                                | 00003 | 0003650 | 427 | H/ | Cac/  | -     | 0  | 0.7 | 1.7   | 2.101 | pact    | 0.808  | mpact       | 0.826 | low_impact    |
|   | tumor  |               |         |     |                                                | 75856 | 16      |     | D  | Gac   |       |    | 94  |       |       |         |        |             |       |               |
| 3 | Liver  | Private in    | 1:11076 | KC  | potassium voltage-gated channel,               | ENST0 | ENSP00  |     |    |       |       |    |     |       |       | high_im |        | medium_i    |       |               |
|   | metas  | metastatic    | 5601    | NC4 | Shaw-related subfamily, member 4               | 00004 | 0003880 | 232 | S/ | Tct/C | -     | 0  | 0.9 | NA    | 2.511 | pact    | 1.289  | mpact       | NA    | NA            |
|   | tases  | tumor         |         |     |                                                | 13138 | 29      |     | P  | ct    |       |    | 79  |       |       |         |        |             |       |               |
| 3 | Prima  | Private in    | 22:3744 | KCT | potassium channel tetramerisation domain       | ENST0 | ENSP00  |     |    |       |       |    |     |       |       | high_im |        | medium_i    |       |               |
|   | ry     | primary tumor | 9227    | D17 | containing 17                                  | 00004 | 0004024 | 61  | D/ | Gac/  | -     | 0  | 0.9 | NA    | 2.06  | pact    | 1.004  | mpact       | NA    | NA            |
|   | tumor  |               |         |     |                                                | 31531 | 34      |     | Y  | Tac   |       |    | 41  |       |       |         |        |             |       |               |
| 3 | Prima  | Common in     | 1:33231 | KIA |                                                | ENST0 | ENSP00  |     |    |       |       |    |     |       |       | high_im |        | low_impact  |       |               |
|   | ry     | primary and   | 380     | A15 | KIAA1522                                       | 00002 | 0002945 | 4   | F/ | Ttc/G | rs669 | 0  | 0.1 | NA    | 2.929 | pact    | -0.438 | ct          | NA    | NA            |
|   | tumor  | metastatic    |         | 22  |                                                | 94521 | 21      |     | V  | tc    | 4085  | 2  |     |       |       |         |        |             |       |               |
|   | tumors |               |         |     |                                                |       |         |     |    |       |       |    |     |       |       |         |        |             |       |               |
| 3 | Liver  | Common in     | 1:33231 | KIA |                                                | ENST0 | ENSP00  |     |    |       |       |    |     |       |       | high_im |        | low_impact  |       |               |
|   | metas  | primary and   | 380     | A15 | KIAA1522                                       | 00003 | 0003625 | 4   | F/ | Ttc/G | rs669 | 0  | 0.4 | 1.445 | 2.929 | pact    | -0.038 | ct          | 0.594 | low_impact    |
|   | tases  | metastatic    |         | 22  |                                                | 73480 | 79      |     | V  | tc    | 4085  | 03 |     |       |       |         |        |             |       |               |
|   | tumors |               |         |     |                                                |       |         |     |    |       |       |    |     |       |       |         |        |             |       |               |
| 3 | Liver  | Private in    | 12:1058 | KLR | killer cell lectin-like receptor subfamily C,  | ENST0 | ENSP00  |     |    |       |       |    |     |       |       | high_im |        | medium_i    |       |               |
|   | metas  | metastatic    | 8530    | C2  | member 2                                       | 00003 | 0003713 | 19  | R/ | cGg/  | rs341 | 0  | 0.7 | 1.9   | 2.056 | pact    | 0.449  | mpact       | 0.985 | low_impact    |
|   | tases  | tumor         |         |     |                                                | 81901 | 26      |     | P  | cCg   | 95537 | 19 |     |       |       |         |        |             |       |               |
| 3 | Prima  | Common in     | 12:2539 | KRA | v-Ki-ras2 Kirsten rat sarcoma viral oncogene   | ENST0 | ENSP00  |     |    |       |       |    |     |       |       | high_im |        | medium_i    |       |               |
|   | ry     | primary and   | 8284    | S   | homolog                                        | 00002 | 0002560 | 12  | G/ | gGt/g | COS   | 0  | 0.8 | 3.245 | 2.172 | pact    | 0.599  | mpact       | 2.064 | medium_impact |
|   | tumor  | metastatic    |         |     |                                                | 56078 | 78      |     | D  | At    | M521  | 77 |     |       |       |         |        |             |       |               |

|   |       |               |         |     |                                              |       |         |     |    |       |       |   |     |       |       |         |       |          |            |
|---|-------|---------------|---------|-----|----------------------------------------------|-------|---------|-----|----|-------|-------|---|-----|-------|-------|---------|-------|----------|------------|
|   |       | tumors        |         |     |                                              |       |         |     |    |       |       |   |     |       |       |         |       |          |            |
|   |       | Common in     |         |     |                                              |       |         |     |    |       |       |   |     |       |       |         |       |          |            |
| 3 | Liver | primary and   | 12:2539 | KRA | v-Ki-ras2 Kirsten rat sarcoma viral oncogene | ENST0 | ENSP00  |     |    |       |       |   |     |       |       |         |       |          |            |
|   | metas | metastatic    | 8284    | S   | homolog                                      | 00002 | 0002560 | 12  | G/ | gGt/g | COS   | 0 | 0.8 | 3.245 | 2.172 | high_im | 0.599 | medium_i | 2.064      |
|   | tases | tumors        |         |     |                                              | 56078 | 78      |     | D  | At    | M521  |   | 77  |       |       | pact    |       | mpact    | act        |
|   |       | Common in     |         |     |                                              |       |         |     |    |       |       |   |     |       |       |         |       |          |            |
| 3 | Prima | primary and   | 9:13964 | LCN | lipocalin 8                                  | ENST0 | ENSP00  |     |    |       |       |   |     |       |       |         |       |          |            |
|   | ry    | metastatic    | 9612    | 8   |                                              | 00003 | 0003607 | 141 | G/ | gGg/  | rs228 | 0 | 0.9 | NA    | 2.117 | high_im | 1.705 | high_imp | NA         |
|   | tumor | tumors        |         |     |                                              | 71688 | 53      |     | V  | gTg   | 2258  |   | 98  |       |       | pact    |       | ct       | NA         |
|   |       | Common in     |         |     |                                              |       |         |     |    |       |       |   |     |       |       |         |       |          |            |
| 3 | Liver | primary and   | 9:13964 | LCN | lipocalin 8                                  | ENST0 | ENSP00  |     |    |       |       |   |     |       |       |         |       |          |            |
|   | metas | metastatic    | 9612    | 8   |                                              | 00003 | 0003607 | 141 | G/ | gGg/  | rs228 | 0 | 0.9 | NA    | 2.117 | high_im | 1.705 | high_imp | NA         |
|   | tases | tumors        |         |     |                                              | 71688 | 53      |     | V  | gTg   | 2258  |   | 98  |       |       | pact    |       | ct       | NA         |
|   |       | Private in    |         |     |                                              |       |         |     |    |       |       |   |     |       |       |         |       |          |            |
| 3 | Liver | metastatic    | 10:8598 | LRI | leucine-rich repeat, immunoglobulin-like and | ENST0 | ENSP00  |     |    |       |       |   |     |       |       |         |       |          |            |
|   | metas | tumor         | 1890    | T2  | transmembrane domains 2                      | 00003 | 0003611 | 480 | G/ | gGc/  | -     | 0 | 1   | 0     | 2.062 | high_im | 1.894 | high_imp | -1.067     |
|   | tases | tumors        |         |     |                                              | 72113 | 85      |     | V  | gTc   |       |   |     |       |       | pact    |       | ct       | low_impact |
|   |       | Private in    |         |     |                                              |       |         |     |    |       |       |   |     |       |       |         |       |          |            |
| 3 | Prima | primary tumor | 6:31683 | LY6 | lymphocyte antigen 6 complex, locus G6D      | ENST0 | ENSP00  |     |    |       |       |   |     |       |       |         |       |          |            |
|   | ry    | tumors        | 157     | G6D |                                              | 00003 | 0003649 | 9   | L/ | Ttg/  | rs374 | 0 | 0.7 | NA    | 2.929 | high_im | 0.379 | medium_i | NA         |
|   | tumor | tumors        |         |     |                                              | 75824 | 84      |     | V  | Gtg   | 9952  |   | 82  |       |       | pact    |       | mpact    | NA         |
|   |       | Private in    |         |     |                                              |       |         |     |    |       |       |   |     |       |       |         |       |          |            |
| 3 | Liver | metastatic    | 1:85491 | MC  | mucopolip 3                                  | ENST0 | ENSP00  |     |    |       |       |   |     |       |       |         |       |          |            |
|   | metas | tumor         | 872     | 3   |                                              | 00003 | 0003596 | 310 | G/ | Gga/  | -     | 0 | 1   | NA    | 2.128 | high_im | 1.81  | high_imp | NA         |
|   | tases | tumors        |         |     |                                              | 70587 | 19      |     | R  | Aga   |       |   |     |       |       | pact    |       | ct       | NA         |
|   |       | Common in     |         |     |                                              |       |         |     |    |       |       |   |     |       |       |         |       |          |            |
| 3 | Prima | primary and   | 7:15194 | MLL | myeloid/lymphoid or mixed-lineage leukemia   | ENST0 | ENSP00  |     |    |       |       |   |     |       |       |         |       |          |            |
|   | ry    | metastatic    | 5007    | 3   | 3                                            | 00003 | 0003473 | 838 | G/ | Ggt/  | rs247 | N | 0.9 | NA    | NA    | NA      | 1.617 | high_imp | NA         |
|   | tumor | tumors        |         |     |                                              | 55193 | 25      |     | S  | Agt   | 9172  | A | 99  |       |       |         |       | ct       | NA         |
|   |       | Common in     |         |     |                                              |       |         |     |    |       |       |   |     |       |       |         |       |          |            |
| 3 | Liver | primary and   | 7:15194 | MLL | myeloid/lymphoid or mixed-lineage leukemia   | ENST0 | ENSP00  |     |    |       |       |   |     |       |       |         |       |          |            |
|   | metas | metastatic    | 5007    | 3   | 3                                            | 00003 | 0003473 | 838 | G/ | Ggt/  | rs247 | N | 0.9 | NA    | NA    | NA      | 1.617 | high_imp | NA         |
|   | tases | tumors        |         |     |                                              | 55193 | 25      |     | S  | Agt   | 9172  | A | 99  |       |       |         |       | ct       | NA         |



|   |                  |                                         |                  |                |  |                                                                                                       |                         |                         |      |         |             |                |             |           |      |       |               |        |               |       |            |
|---|------------------|-----------------------------------------|------------------|----------------|--|-------------------------------------------------------------------------------------------------------|-------------------------|-------------------------|------|---------|-------------|----------------|-------------|-----------|------|-------|---------------|--------|---------------|-------|------------|
| 3 | Primary tumor    | Private in primary tumor                | 10:1027<br>43721 | MR<br>PL4<br>3 |  | mitochondrial ribosomal protein L43                                                                   | ENST0<br>00003<br>70242 | ENSP00<br>0003592<br>62 | 192  | Q/<br>H | caG/<br>caC | -<br>-         | 0<br>0      | 0.1<br>79 | NA   | 2.562 | high_impact   | -0.36  | low_impact    | NA    | NA         |
| 3 | Primary tumor    | Private in primary tumor                | 10:1027<br>43733 | MR<br>PL4<br>3 |  | mitochondrial ribosomal protein L43                                                                   | ENST0<br>00003<br>70242 | ENSP00<br>0003592<br>62 | 188  | Q/<br>H | caG/<br>caC | -<br>-         | 0<br>0      | 0.1<br>79 | NA   | 2.562 | high_impact   | -0.36  | low_impact    | NA    | NA         |
| 3 | Primary tumor    | Common in primary and metastatic tumors | 11:5986<br>3104  | MS4<br>A2      |  | membrane-spanning 4-domains, subfamily A, member 2 (Fc fragment of IgE, high affinity I, receptor for | ENST0<br>00002<br>78888 | ENSP00<br>0002788<br>88 | 237  | E/<br>G | gAa/<br>gGa | rs569<br>108   | 0<br>0      | 0.4<br>43 | 1.04 | 1.881 | medium_impact | -0.303 | low_impact    | 0.012 | low_impact |
| 3 | Liver metastases | Common in primary and metastatic tumors | 11:5986<br>3104  | MS4<br>A2      |  | membrane-spanning 4-domains, subfamily A, member 2 (Fc fragment of IgE, high affinity I, receptor for | ENST0<br>00002<br>78888 | ENSP00<br>0002788<br>88 | 237  | E/<br>G | gAa/<br>gGa | rs569<br>108   | 0<br>0      | 0.4<br>43 | 1.04 | 1.881 | medium_impact | -0.303 | low_impact    | 0.012 | low_impact |
| 3 | Primary tumor    | Private in primary tumor                | 16:7071<br>4717  | MT<br>SS1<br>L |  | metastasis suppressor 1-like                                                                          | ENST0<br>00002<br>54951 | ENSP00<br>0002549<br>51 | 62   | D/<br>V | gAc/<br>gTc | -<br>-         | 0<br>1<br>3 | 0<br>1    | NA   | 0.104 | medium_impact | 1.836  | high_impact   | NA    | NA         |
| 3 | Liver metastases | Private in metastatic tumor             | 1:26140<br>655   | NA<br>NA       |  |                                                                                                       | ENST0<br>00005<br>27604 | ENSP00<br>0004323<br>11 | 37   | P/<br>T | Ccc/<br>Acc | -<br>-         | 0<br>0      | 0<br>0    | NA   | 2.929 | high_impact   | -1.667 | low_impact    | NA    | NA         |
| 3 | Liver metastases | Private in metastatic tumor             | 12:1058<br>8530  | NA<br>NA       |  |                                                                                                       | ENST0<br>00005<br>39033 | ENSP00<br>0004375<br>63 | 19   | R/<br>P | cGg/<br>cCg | rs341<br>95537 | 0<br>0      | 0.9<br>88 | NA   | 2.117 | high_impact   | 1.27   | medium_impact | NA    | NA         |
| 3 | Primary tumor    | Common in primary and metastatic tumors | 2:13354<br>0605  | NC<br>KAP<br>5 |  | NCK-associated protein 5                                                                              | ENST0<br>00003<br>17721 | ENSP00<br>0003806<br>03 | 1260 | P/<br>Q | cCa/<br>cAa | rs130<br>16342 | 0<br>0      | 0.8<br>62 | NA   | 2.062 | high_impact   | 0.653  | medium_impact | NA    | NA         |
| 3 | Liver metastases | Common in primary and                   | 2:13354<br>0605  | NC<br>KAP      |  | NCK-associated protein 5                                                                              | ENST0<br>00003          | ENSP00<br>0003806       | 1260 | P/<br>Q | cCa/<br>cAa | rs130<br>16342 | 0<br>0      | 0.8<br>62 | NA   | 2.062 | high_impact   | 0.653  | medium_impact | NA    | NA         |

|   |       |               |         |     |                                                 |       |         |     |    |       |       |    |     |       |       |          |        |               |        |               |
|---|-------|---------------|---------|-----|-------------------------------------------------|-------|---------|-----|----|-------|-------|----|-----|-------|-------|----------|--------|---------------|--------|---------------|
|   | tases | metastatic    | 5       |     |                                                 | 17721 | 03      |     |    |       |       |    |     |       |       |          |        |               |        |               |
|   |       | tumors        |         |     |                                                 |       |         |     |    |       |       |    |     |       |       |          |        |               |        |               |
| 3 | Prima | Private in    | 19:3633 | NP  | nephrosis 1, congenital, Finnish type (nephrin) | ENST0 | ENSP00  |     |    |       |       |    |     |       |       |          |        |               |        |               |
|   | ry    | primary tumor | 8987    | HS1 |                                                 | 00003 | 0003681 | 466 | L/ | Ttg/  | -     | .  | 0.9 | 0.535 | -2.30 | low_im   | 1.541  | high_impact   | -0.652 | low_impact    |
|   | tumor |               |         |     |                                                 | 78910 | 90      |     | V  | Gtg   |       |    |     |       |       | pact     |        |               |        |               |
|   |       |               |         |     |                                                 |       |         |     |    |       |       |    |     |       |       |          |        |               |        |               |
| 3 | Prima | Private in    | 20:3870 | PAN | pantothenate kinase 2                           | ENST0 | ENSP00  |     |    |       |       |    |     |       |       |          |        |               |        |               |
|   | ry    | primary tumor | 079     | K2  |                                                 | 00003 | 0003133 | 111 | L/ | cTg/c | rs716 | 0  | 0.8 | 0     | 2.015 | high_im  | 0.794  | medium_impact | -1.065 | low_impact    |
|   | tumor |               |         |     |                                                 | 16562 | 77      |     | Q  | Ag    | 47828 | 9  |     |       |       | pact     |        |               |        |               |
|   |       |               |         |     |                                                 |       |         |     |    |       |       |    |     |       |       |          |        |               |        |               |
| 3 | Prima | Private in    | 17:8167 | PFA | phosphoribosylformylglycinamide synthase        | ENST0 | ENSP00  |     |    |       |       |    |     |       |       |          |        |               |        |               |
|   | ry    | primary tumor | 118     | S   |                                                 | 00003 | 0003134 | 552 | L/ | cTg/c | -     | .  | 1   | 3.465 | 1.056 | mediu    | 2.102  | high_impact   | 1.763  | medium_impact |
|   | tumor |               |         |     |                                                 | 14666 | 90      |     | P  | Cg    |       | 0  |     |       |       | m_impact |        |               |        |               |
|   |       |               |         |     |                                                 |       |         |     |    |       |       |    |     |       |       |          |        |               |        |               |
| 3 | Liver | Private in    | 9:13148 | PKN | protein kinase N3                               | ENST0 | ENSP00  |     |    |       |       |    |     |       |       |          |        |               |        |               |
|   | metas | metastatic    | 2719    | 3   |                                                 | 00002 | 0002919 | 835 | F/ | tTc/t | -     | 0  | 0.0 | 3.615 | 2.572 | high_im  | -0.568 | low_impact    | 2.381  | medium_impact |
|   | tases | tumor         |         |     |                                                 | 91906 | 06      |     | S  | Cc    |       | 18 |     |       |       | pact     |        |               |        |               |
|   |       |               |         |     |                                                 |       |         |     |    |       |       |    |     |       |       |          |        |               |        |               |
| 3 | Prima | Common in     | 7:76240 | PO  | POM121 and ZP3 fusion                           | ENST0 | ENSP00  |     |    |       |       |    |     |       |       |          |        |               |        |               |
|   | ry    | primary and   | 786     | MZ  |                                                 | 00003 | 0003092 | 187 | L/ | cTg/c | rs718 | 0  | 0   | 0     | 2.064 | high_im  | -1.516 | low_impact    | -1.036 | low_impact    |
|   | tumor | metastatic    |         | P3  |                                                 | 10842 | 33      |     | P  | Cg    | 19724 |    |     |       |       | pact     |        |               |        |               |
|   |       | tumors        |         |     |                                                 |       |         |     |    |       |       |    |     |       |       |          |        |               |        |               |
| 3 | Liver | Common in     | 7:76240 | PO  | POM121 and ZP3 fusion                           | ENST0 | ENSP00  |     |    |       |       |    |     |       |       |          |        |               |        |               |
|   | metas | primary and   | 786     | MZ  |                                                 | 00004 | 0004169 | 124 | L/ | cTg/c | rs718 | 0  | NA  | NA    | 2.064 | high_im  | NA     | NA            | NA     | NA            |
|   | tases | metastatic    |         | P3  |                                                 | 41393 | 63      |     | P  | Cg    | 19724 |    |     |       |       | pact     |        |               |        |               |
|   |       | tumors        |         |     |                                                 |       |         |     |    |       |       |    |     |       |       |          |        |               |        |               |
| 3 | Liver | Private in    | 19:5271 | PPP | protein phosphatase 2, regulatory subunit A,    | ENST0 | ENSP00  |     |    |       |       |    |     |       |       |          |        |               |        |               |
|   | metas | metastatic    | 5982    | 2R1 | alpha                                           | 00003 | 0003756 | 103 | R/ | Cgg/  | COS   | 0  | 1   | NA    | 2.748 | high_im  | 1.817  | high_impact   | NA     | NA            |
|   | tases | tumor         |         | A   |                                                 | 91791 | 68      |     | W  | Tgg   | M512  | 10 |     |       |       | pact     |        |               |        |               |
|   |       |               |         |     |                                                 |       |         |     |    |       |       |    |     |       |       |          |        |               |        |               |
| 3 | Prima | Common in     | 9:98209 | PTC | patched 1                                       | ENST0 | ENSP00  |     |    |       |       |    |     |       |       |          |        |               |        |               |
|   | ry    | primary and   | 594     | H1  |                                                 | 00003 | 0003644 | 107 | P/ | cCc/  | rs357 | 0  | 0.9 | NA    | 2.256 | high_im  | 1.218  | medium_impact | NA     | NA            |
|   | tumor | metastatic    |         |     |                                                 | 75284 | 33      |     | L  | cTc   | 564   | 52 |     |       |       | pact     |        |               |        |               |

| tumors |                  |               |         |     |                                                                                                                  |        |         |      |     |      |       |    |     |       |       |         |       |             |        |            |
|--------|------------------|---------------|---------|-----|------------------------------------------------------------------------------------------------------------------|--------|---------|------|-----|------|-------|----|-----|-------|-------|---------|-------|-------------|--------|------------|
| 3      | Liver metastases | Common in     |         |     | ENST0                                                                                                            | ENSP00 |         |      |     |      |       |    |     |       |       |         |       |             |        |            |
|        |                  | primary and   | 9:98209 | PTC |                                                                                                                  |        |         |      |     |      |       |    |     |       |       |         |       |             |        |            |
|        |                  | metastatic    | 594     | H1  | patched 1                                                                                                        | 00003  | 0003644 | 107  | P/  | cCc/ | rs357 | 0  | 0.9 | NA    | 2.256 | high_im | 1.218 | medium_i    | NA     | NA         |
|        | tases            | tumors        |         |     | 75284                                                                                                            | 33     |         | L    | cTc | 564  |       | 52 |     |       | pact  |         | mpact |             |        |            |
| 3      | Liver metastases | Private in    | 5:63802 | RG  |                                                                                                                  |        |         |      |     |      |       |    |     |       |       |         |       |             |        |            |
|        |                  | metastatic    | 483     | S7B | regulator of G-protein signaling 7 binding                                                                       | 00003  | 0003348 | 11   | R/  | cGc/ | -     | 0  | 0.9 | 0.895 | 2.062 | high_im | 1.417 | medium_i    | -0.128 | low_impact |
|        |                  | tumor         |         | P   | protein                                                                                                          | 34025  | 51      |      | H   | cAc  |       |    | 93  |       |       | pact    |       | mpact       |        |            |
| 3      | Liver metastases | Private in    | 3:78649 | RO  |                                                                                                                  |        |         |      |     |      |       |    |     |       |       |         |       |             |        |            |
|        |                  | metastatic    | 426     | BO1 | roundabout, axon guidance receptor, homolog                                                                      | 00004  | 0004206 | 1548 | P/  | cCa/ | -     | 0  | 0.4 | NA    | 2.172 | high_im | 0.032 | medium_i    | NA     | NA         |
|        |                  | tumor         |         |     | 1 (Drosophila)                                                                                                   | 95273  | 37      |      | L   | cTa  |       |    | 44  |       |       | pact    |       | mpact       |        |            |
| 3      | Liver metastases | Private in    | 19:5013 | RR  |                                                                                                                  |        |         |      |     |      |       |    |     |       |       |         |       |             |        |            |
|        |                  | metastatic    | 9934    | AS  | related RAS viral (r-ras) oncogene homolog                                                                       | 00002  | 0002467 | 132  | R/  | cGc/ | -     | 0  | 1   | 1.07  | 0.358 | mediu   | 2.094 | high_impact | -0.403 | low_impact |
|        |                  | tumor         |         |     |                                                                                                                  | 46792  | 92      |      | H   | cAc  |       |    | 6   |       |       | act     |       | act         |        |            |
| 3      | Primary tumor    | Private in    | 20:6232 | RTE |                                                                                                                  |        |         |      |     |      |       |    |     |       |       |         |       |             |        |            |
|        |                  | primary tumor | 9767    | L1  | regulator of telomere elongation helicase 1                                                                      | 00003  | 0003590 | 252  | A/  | Gcc/ | -     | 0  | 0.9 | 1.245 | 2.343 | high_im | 1.05  | medium_i    | -0.181 | low_impact |
|        |                  | tumor         |         |     |                                                                                                                  | 70006  | 23      |      | P   | Ccc  |       |    | 52  |       |       | pact    |       | mpact       |        |            |
| 3      | Primary tumor    | Private in    | 10:1027 | SE  |                                                                                                                  |        |         |      |     |      |       |    |     |       |       |         |       |             |        |            |
|        |                  | primary tumor | 43724   | MA4 | sema domain, immunoglobulin domain (Ig), transmembrane domain (TM) and short cytoplasmic domain, (semaphorin) 4G | 00003  | 0003592 | 785  | P/  | Ccc/ | -     | 0  | 0.9 | 1.04  | 1.949 | mediu   | 1.856 | high_impact | -0.081 | low_impact |
|        |                  | tumor         |         | G   |                                                                                                                  | 70250  | 70      |      | A   | Gcc  |       |    | 99  |       |       | act     |       | act         |        |            |
| 3      | Primary tumor    | Private in    | 10:1027 | SE  |                                                                                                                  |        |         |      |     |      |       |    |     |       |       |         |       |             |        |            |
|        |                  | primary tumor | 43721   | MA4 | sema domain, immunoglobulin domain (Ig), transmembrane domain (TM) and short cytoplasmic domain, (semaphorin) 4G | 00002  | 0002106 | 789  | L/  | Ctg/ | -     | 0  | 0.9 | NA    | 1.949 | mediu   | 1.593 | high_impact | NA     | NA         |
|        |                  | tumor         |         | G   |                                                                                                                  | 10633  | 33      |      | V   | Gtg  |       |    | 97  |       |       | act     |       | act         |        |            |
| 3      | Primary tumor    | Private in    | 10:1027 | SE  |                                                                                                                  |        |         |      |     |      |       |    |     |       |       |         |       |             |        |            |
|        |                  | primary tumor | 43733   | MA4 | sema domain, immunoglobulin domain (Ig), transmembrane domain (TM) and short cytoplasmic domain, (semaphorin) 4G | 00005  | 0004308 | 788  | L/  | Ctg/ | -     | 0  | 0.9 | NA    | 0.665 | mediu   | 1.593 | high_impact | NA     | NA         |
|        |                  | tumor         |         | G   |                                                                                                                  | 21006  | 81      |      | V   | Gtg  |       |    | 97  |       |       | act     |       | act         |        |            |
| 3      | Liver metastases | Private in    | 1:26140 | SEP |                                                                                                                  |        |         |      |     |      |       |    |     |       |       |         |       |             |        |            |
|        |                  | metastatic    | 655     | N1  | selenoprotein N, 1                                                                                               | ENST0  | ENSP00  | 496  | P/  | Ccc/ | -     | 0  | 0.9 | NA    | 0.675 | mediu   | 1.738 | high_impact | NA     | NA         |
|        |                  | tumor         |         |     |                                                                                                                  | 00003  | 0003634 |      | T   | Acc  |       |    | 98  |       |       | m_imp   |       | ct          |        |            |

|   |                         |                                   |                 |                 |                                                                                |                |                   |      |         |             |                |   |           |       |       |                 |        |                   |       |                   |
|---|-------------------------|-----------------------------------|-----------------|-----------------|--------------------------------------------------------------------------------|----------------|-------------------|------|---------|-------------|----------------|---|-----------|-------|-------|-----------------|--------|-------------------|-------|-------------------|
|   | tases                   | tumor                             |                 |                 | 74315                                                                          | 34             |                   |      |         |             | 0              |   |           |       | act   |                 |        |                   |       |                   |
|   |                         |                                   |                 |                 |                                                                                |                |                   |      |         |             | 3              |   |           |       |       |                 |        |                   |       |                   |
| 3 | Prima<br>ry             | Private in<br>primary tumor       | 1:67895<br>901  | SER<br>BP1      | SERPINE1 mRNA binding protein 1                                                | ENST0<br>00003 | ENSP00<br>0003600 | 28   | F/<br>S | tTc/t<br>Cc | -              | 0 | 0.8<br>93 | NA    | 2.339 | high_im<br>pact | 0.987  | medium_i<br>mpact | NA    | NA                |
|   |                         |                                   |                 |                 |                                                                                | 70994          | 33                |      |         |             |                |   |           |       |       |                 |        |                   |       |                   |
| 3 | Prima<br>ry             | Private in<br>primary tumor       | 1:15678<br>3743 | SH2<br>D2A      | SH2 domain containing 2A                                                       | ENST0<br>00003 | ENSP00<br>0003571 | 137  | G/<br>V | gGc/<br>gTc | -              | . | 1         | NA    | 0.212 | mediu<br>m_imp  | 1.784  | high_imp<br>act   | NA    | NA                |
|   |                         |                                   |                 |                 |                                                                                | 68198          | 81                |      |         |             |                | 8 |           |       |       |                 |        |                   |       |                   |
| 3 | Liver<br>metas<br>tases | Private in<br>metastatic<br>tumor | 11:4060<br>59   | SIGI<br>RR      | single immunoglobulin and toll-interleukin 1<br>receptor (TIR) domain          | ENST0<br>00005 | ENSP00<br>0004341 | 77   | G/<br>A | gGt/g<br>Ct | -              | 0 | 0.9<br>9  | NA    | 2.048 | high_im<br>pact | 1.383  | medium_i<br>mpact | NA    | NA                |
|   |                         |                                   |                 |                 |                                                                                | 28845          | 64                |      |         |             |                |   |           |       |       |                 |        |                   |       |                   |
| 3 | Prima<br>ry             | Private in<br>primary tumor       | 16:5693<br>6319 | SLC<br>12A<br>3 | solute carrier family 12 (sodium/chloride<br>transporters), member 3           | ENST0<br>00004 | ENSP00<br>0004021 | 927  | R/<br>C | Cgt/T<br>gt | rs127<br>08965 | . | 0.9<br>97 | NA    | 0.866 | mediu<br>m_imp  | 1.545  | high_imp<br>act   | NA    | NA                |
|   |                         |                                   |                 |                 |                                                                                | 38926          | 52                |      |         |             |                | 3 |           |       |       |                 |        |                   |       |                   |
| 3 | Liver<br>metas<br>tases | Private in<br>metastatic<br>tumor | 16:3149<br>7186 | SLC<br>5A2      | solute carrier family 5 (sodium/glucose<br>cotransporter), member 2            | ENST0<br>00004 | ENSP00<br>0004106 | 147  | L/<br>P | cTt/c<br>Ct | -              | 0 | 1         | NA    | 2.418 | high_im<br>pact | 1.782  | high_imp<br>ct    | NA    | NA                |
|   |                         |                                   |                 |                 |                                                                                | 19665          | 01                |      |         |             |                |   |           |       |       |                 |        |                   |       |                   |
| 3 | Prima<br>ry             | Private in<br>primary tumor       | 5:14958<br>2191 | SLC<br>6A7      | solute carrier family 6 (neurotransmitter<br>transporter, L-proline), member 7 | ENST0<br>00005 | ENSP00<br>0004282 | 338  | G/<br>S | Ggc/<br>Agc | rs117<br>38176 | 0 | 0.9<br>94 | NA    | 1.937 | mediu<br>m_imp  | 1.555  | high_imp<br>act   | NA    | NA                |
|   |                         |                                   |                 |                 |                                                                                | 24041          | 00                |      |         |             | 6              |   |           |       |       |                 |        |                   |       |                   |
| 3 | Prima<br>ry             | Private in<br>primary tumor       | 17:2796<br>3318 | SSH<br>2        | slingshot homolog 2 (Drosophila)                                               | ENST0<br>00002 | ENSP00<br>0002690 | 617  | T/<br>S | Aca/<br>Tca | -              | 0 | 0.9<br>21 | 1.995 | 2.16  | high_im<br>pact | 0.851  | medium_i<br>mpact | 1.001 | medium_imp<br>act |
|   |                         |                                   |                 |                 |                                                                                | 69033          | 33                |      |         |             |                |   |           |       |       |                 |        |                   |       |                   |
| 3 | Prima<br>ry             | Private in<br>primary tumor       | 17:2795<br>8468 | SSH<br>2        | slingshot homolog 2 (Drosophila)                                               | ENST0<br>00005 | ENSP00<br>0004447 | 1248 | I/<br>M | atA/a<br>tG | -              | 0 | 0.0<br>02 | NA    | 2.16  | high_im<br>pact | -1.247 | low_imp<br>ct     | NA    | NA                |
|   |                         |                                   |                 |                 |                                                                                | 40801          | 43                |      |         |             |                |   |           |       |       |                 |        |                   |       |                   |
| 3 | Prima<br>ry             | Private in<br>primary tumor       | 3:52550<br>165  | STA<br>B1       | stabilin 1                                                                     | ENST0<br>00003 | ENSP00<br>0003129 | 1352 | G/<br>V | gGc/<br>gTc | -              | 0 | 0.9<br>98 | 1.445 | 1.298 | mediu<br>m_imp  | 1.55   | high_imp<br>ct    | 0.327 | low_impact        |

|   |                         |                                                  |                 |                  |                                                           |                |                   |      |         |             |                |   |           |       |       |                       |        |                   |        |                   |
|---|-------------------------|--------------------------------------------------|-----------------|------------------|-----------------------------------------------------------|----------------|-------------------|------|---------|-------------|----------------|---|-----------|-------|-------|-----------------------|--------|-------------------|--------|-------------------|
|   | tumor                   |                                                  |                 |                  |                                                           | 21725          | 46                |      |         |             |                | 0 |           |       |       | act                   |        |                   |        |                   |
|   |                         |                                                  |                 |                  |                                                           |                |                   |      |         |             |                | 1 |           |       |       |                       |        |                   |        |                   |
| 3 | Prima<br>ry<br>tumor    | Private in<br>primary tumor                      | 22:1975<br>4319 | TBX<br>1         | T-box 1                                                   | ENST0<br>00003 | ENSP00<br>0003317 | 473  | A/<br>T | Gcc/<br>Acc | -              | 0 | 0.4<br>64 | NA    | 2.008 | high_im<br>pact       | 0.201  | medium_i<br>mpact | NA     | NA                |
| 3 | Prima<br>ry<br>tumor    | Private in<br>primary tumor                      | 2:85826<br>257  | TM<br>EM1<br>50A | transmembrane protein 150A                                | ENST0<br>00004 | ENSP00<br>0003872 | 253  | G/<br>E | gGg/<br>gAg | -              | 0 | 0.8<br>39 | 1.04  | 2.929 | high_im<br>pact       | 0.473  | medium_i<br>mpact | 0.151  | low_impact        |
| 3 | Prima<br>ry<br>tumor    | Common in<br>primary and<br>metastatic<br>tumors | 5:34850<br>389  | TTC<br>23L       | tetratricopeptide repeat domain 23-like                   | ENST0<br>00005 | ENSP00<br>0004252 | 119  | A/<br>T | Gct/<br>Act | rs777<br>93555 | 0 | 0.9<br>98 | NA    | 2.117 | high_im<br>pact       | 1.705  | high_imp<br>act   | NA     | NA                |
| 3 | Liver<br>metas<br>tases | Common in<br>primary and<br>metastatic<br>tumors | 5:34850<br>389  | TTC<br>23L       | tetratricopeptide repeat domain 23-like                   | ENST0<br>00005 | ENSP00<br>0004252 | 119  | A/<br>T | Gct/<br>Act | rs777<br>93555 | 0 | 0.9<br>98 | NA    | 2.117 | high_im<br>pact       | 1.705  | high_imp<br>act   | NA     | NA                |
| 3 | Liver<br>metas<br>tases | Private in<br>metastatic<br>tumor                | 2:13095<br>1949 | TUB<br>A3E       | tubulin, alpha 3e                                         | ENST0<br>00003 | ENSP00<br>0003181 | 156  | R/<br>W | Cgg/<br>Tgg | rs621<br>65074 | 0 | 1         | 4.245 | 1.937 | mediu<br>m_imp<br>act | 2      | high_imp<br>act   | 2.469  | medium_imp<br>act |
| 3 | Prima<br>ry<br>tumor    | Private in<br>primary tumor                      | 16:1364<br>057  | UBE<br>2I        | ubiquitin-conjugating enzyme E2I (UBC9<br>homolog, yeast) | ENST0<br>00003 | ENSP00<br>0003806 | 9    | L/<br>H | cTc/c<br>Ac | -              | 0 | 0.9<br>99 | 4.59  | 2.239 | high_im<br>pact       | 2.399  | high_imp<br>act   | 7.795  | high_impact       |
| 3 | Prima<br>ry<br>tumor    | Private in<br>primary tumor                      | 9:10968<br>7431 | ZNF<br>462       | zinc finger protein 462                                   | ENST0<br>00002 | ENSP00<br>0002772 | 413  | A/<br>E | gCa/<br>gAa | -              | 0 | 0         | 0.805 | 2.084 | high_im<br>pact       | -1.484 | low_imp<br>act    | -0.239 | low_impact        |
| 3 | Prima<br>ry<br>tumor    | Private in<br>primary tumor                      | 16:8850<br>0641 | ZNF<br>469       | zinc finger protein 469                                   | ENST0<br>00004 | ENSP00<br>0004023 | 2227 | D/<br>Y | Gat/<br>Tat | -              | 0 | 0.8<br>6  | 0.55  | 2.064 | high_im<br>pact       | 0.716  | medium_i<br>mpact | -0.458 | low_impact        |
| 3 | Prima<br>ry<br>tumor    | Common in<br>primary and                         | 19:5294<br>2534 | ZNF<br>534       | zinc finger protein 534                                   | ENST0<br>00003 | ENSP00<br>0003275 | 620  | K/<br>N | aaA/<br>aaT | -              | 0 | 0.9<br>95 | 2.05  | -0.43 | low_im<br>pact        | 1.527  | high_imp<br>act   | 0.971  | low_impact        |

|   |            |               |         |     |                                   |            |             |      |         |       |   |     |       |       |               |        |               |        |               |
|---|------------|---------------|---------|-----|-----------------------------------|------------|-------------|------|---------|-------|---|-----|-------|-------|---------------|--------|---------------|--------|---------------|
|   | tumor      | metastatic    |         |     |                                   | 32323      | 38          |      |         |       |   |     |       |       |               |        |               |        |               |
|   |            | tumors        |         |     |                                   |            |             |      |         |       |   |     |       |       |               |        |               |        |               |
|   |            | Common in     |         |     |                                   |            |             |      |         |       |   |     |       |       |               |        |               |        |               |
|   | Liver      | primary and   | 19:5294 | ZNF | zinc finger protein 534           | ENST000003 | ENSP0003275 | 620  | K/aaA/  | -     | . | 0.9 |       |       |               |        |               |        |               |
| 3 | metastases | metastatic    | 2534    | 534 |                                   | 00003      | 0003275     | 620  | NaaT    | -     | 3 | 95  | 2.05  | -0.43 | low_impact    | 1.527  | high_impact   | 0.971  | low_impact    |
|   |            | tumors        |         |     |                                   | 32323      | 38          |      |         |       |   |     |       |       |               |        |               |        |               |
|   | Primary    | Private in    | 19:5307 | ZNF | zinc finger protein 701           | ENST00005  | ENSP0004443 | 34   | H/caC/  | -     | 0 | 0   | NA    | 2.084 | high_impact   | -1.484 | low_impact    | NA     | NA            |
| 3 | tumor      | primary tumor | 5596    | 701 |                                   | 40331      | 39          |      | QcaG    | -     |   |     |       |       |               |        |               |        |               |
|   | Primary    | Private in    | 20:5782 | ZNF | zinc finger protein 831           | ENST00003  | ENSP0003600 | 1397 | D/Gat/  | -     | 0 | 0.4 |       |       |               |        |               |        |               |
| 3 | tumor      | primary tumor | 8953    | 831 |                                   | 71030      | 69          |      | Y Tat   | -     |   | 7   | 1.24  | 2.084 | high_impact   | 0.224  | medium_impact | 0.164  | low_impact    |
|   | Primary    | Private in    | 7:44146 | AEB | AE binding protein 1              | ENST00002  | ENSP0002233 | 111  | E/gaG/  | -     | 0 | 0   | 0.895 | 2.042 | high_impact   | -1.287 | low_impact    | -0.263 | low_impact    |
| 4 | tumor      | primary tumor | 224     | P1  |                                   | 23357      | 57          |      | DgaC    | -     |   |     |       |       |               |        |               |        |               |
|   | Primary    | Private in    | 7:10015 | AGF | ArfGAP with FG repeats 2          | ENST00003  | ENSP0003001 | 228  | D/gAc/  | -     | 0 | 0.9 |       |       |               |        |               |        |               |
| 4 | tumor      | primary tumor | 1813    | G2  |                                   | 00176      | 76          |      | VgTc    | -     |   | 96  | 2.215 | 2.067 | high_impact   | 1.582  | high_impact   | 1.027  | medium_impact |
|   | Primary    | Private in    | 15:8612 | AKA | A kinase (PRKA) anchor protein 13 | ENST00004  | ENSP0003944 | 1355 | E/gAa/  | -     | 0 | 0.9 |       |       |               |        |               |        |               |
| 4 | tumor      | primary tumor | 8960    | P13 |                                   | 58540      | 03          |      | GgGa    | -     |   | 93  | NA    | 1.859 | medium_impact | 1.734  | high_impact   | NA     | NA            |
|   |            | Common in     |         |     |                                   |            |             |      |         |       |   |     |       |       |               |        |               |        |               |
|   | Primary    | primary and   | 9:38588 | ANK | ankyrin repeat domain 18A         | ENST00003  | ENSP0003826 | 688  | Y/tAt/t | rs279 | . | 0.9 |       |       |               |        |               |        |               |
| 4 | tumor      | metastatic    | 602     | RD1 |                                   | 99703      | 10          |      | C Gt    | 9163  | . | 97  | 1.04  | -0.14 | low_impact    | 1.625  | high_impact   | 0.024  | low_impact    |
|   |            | tumors        |         | 8A  |                                   |            |             |      |         |       |   |     |       |       |               |        |               |        |               |
|   | Liver      | Common in     |         |     |                                   |            |             |      |         |       |   |     |       |       |               |        |               |        |               |
|   | metastases | primary and   | 9:38588 | ANK | ankyrin repeat domain 18A         | ENST00003  | ENSP0003826 | 688  | Y/tAt/t | rs279 | . | 0.9 |       |       |               |        |               |        |               |
| 4 | tumor      | metastatic    | 602     | RD1 |                                   | 99703      | 10          |      | C Gt    | 9163  | . | 97  | 1.04  | -0.14 | low_impact    | 1.625  | high_impact   | 0.024  | low_impact    |
|   |            | tumors        |         | 8A  |                                   |            |             |      |         |       |   |     |       |       |               |        |               |        |               |
| 4 | Primary    | Private in    | 12:5853 | AN  | anoctamin 2                       | ENST00004  | ENSP000407  | 407  | C/tGt/t | -     | 0 | 0.9 | NA    | 2.124 | high_impact   | 1.808  | high_impact   | NA     | NA            |

|   |        |               |         |      |                                            |       |         |     |    |       |       |     |       |       |         |       |           |           |            |            |
|---|--------|---------------|---------|------|--------------------------------------------|-------|---------|-----|----|-------|-------|-----|-------|-------|---------|-------|-----------|-----------|------------|------------|
|   | ry     | primary tumor | 445     | O2   |                                            | 00003 | 0003484 |     | S  | Ct    |       | 99  |       |       | pact    |       | ct        |           |            |            |
|   | tumor  |               |         |      |                                            | 56134 | 53      |     |    |       |       |     |       |       |         |       |           |           |            |            |
| 4 | Liver  | Private in    | 19:3636 | APL  |                                            | ENST0 | ENSP00  |     |    |       |       |     |       |       | high_im |       | medium_i  |           |            |            |
|   | metas  | metastatic    | 2903    | P1   | amyloid beta (A4) precursor-like protein 1 | 00002 | 0002218 | 272 | P/ | cCc/  | -     | 0   | 0.9   | 0.55  | 2.085   | pact  | 0.787     | mpact     | -0.551     | low_impact |
|   | tases  | tumor         |         |      |                                            | 21891 | 91      |     | H  | cAc   |       |     |       |       |         |       |           |           |            |            |
| 4 | Liver  | Private in    | 1:32205 | BAI  |                                            | ENST0 | ENSP00  |     |    |       |       | 0   |       |       |         | mediu |           | high_impa |            |            |
|   | metas  | metastatic    | 185     | 2    | brain-specific angiogenesis inhibitor 2    | 00003 | 0003815 | 673 | F/ | tTc/t | -     | .   | 1     | NA    | 0.923   | m_imp | 1.955     | ct        | NA         | NA         |
|   | tases  | tumor         |         |      |                                            | 98547 | 55      |     | S  | Cc    |       | 0   |       |       |         | act   |           |           |            |            |
| 4 | Liver  | Private in    | 20:6098 | C20  |                                            | ENST0 | ENSP00  |     |    |       |       | 0.9 |       |       | high_im |       | medium_i  |           |            |            |
|   | metas  | metastatic    | 8580    | orf1 | chromosome 20 open reading frame 151       | 00002 | 0002529 | 518 | G/ | Ggg/  | -     | 0   | 1.65  | 2.929 | pact    | 1.384 | mpact     | 0.819     | low_impact |            |
|   | tases  | tumor         |         | 51   |                                            | 52998 | 98      |     | R  | Cgg   |       | 95  |       |       |         |       |           |           |            |            |
| 4 | Prima  | Private in    | 7:89938 | C7o  |                                            | ENST0 | ENSP00  |     |    |       |       |     |       |       | high_im |       | high_impa |           |            |            |
|   | ry     | primary tumor | 680     | rf63 | chromosome 7 open reading frame 63         | 00004 | 0003915 | 422 | T/ | aCg/  | rs113 | 0   | 1     | NA    | 2.117   | pact  | 1.873     | ct        | NA         | NA         |
|   | tumor  |               |         |      |                                            | 49577 | 71      |     | M  | aTg   | 4956  |     |       |       |         |       |           |           |            |            |
| 4 | Liver  | Private in    | 8:27905 | C8o  |                                            | ENST0 | ENSP00  |     |    |       |       | 0   |       |       |         | mediu |           | high_impa |            |            |
|   | metas  | metastatic    | 120     | rf80 | chromosome 8 open reading frame 80         | 00003 | 0003450 | 406 | P/ | Cca/  | -     | .   | 0.9   | 1.04  | 0.141   | m_imp | 1.601     | ct        | -0.253     | low_impact |
|   | tases  | tumor         |         |      |                                            | 41513 | 31      |     | S  | Tca   |       | 0   | 95    |       |         | act   |           |           |            |            |
| 4 | Liver  | Private in    | 9:13974 | C9o  |                                            | ENST0 | ENSP00  |     |    |       |       | 0.9 |       |       | high_im |       | medium_i  |           |            |            |
|   | metas  | metastatic    | 0080    | rf17 | chromosome 9 open reading frame 172        | 00004 | 0004123 | 405 | G/ | gGc/  | -     | 0   | 0.695 | 2.929 | pact    | 0.807 | mpact     | -0.227    | low_impact |            |
|   | tases  | tumor         |         | 2    |                                            | 36881 | 88      |     | V  | gTc   |       | 52  |       |       |         |       |           |           |            |            |
| 4 | Prima  | Common in     | 11:6728 | CAB  |                                            | ENST0 | ENSP00  |     |    |       |       |     |       |       | high_im |       | high_impa |           |            |            |
|   | ry     | primary and   | 7539    | P2   | calcium binding protein 2                  | 00003 | 0003120 | 101 | R/ | Cgg/  | -     | 0   | 1     | NA    | 2.075   | pact  | 1.838     | ct        | NA         | NA         |
|   | tumor  | metastatic    |         |      |                                            | 53903 | 37      |     | W  | Tgg   |       |     |       |       |         |       |           |           |            |            |
|   | tumors | tumors        |         |      |                                            |       |         |     |    |       |       |     |       |       |         |       |           |           |            |            |
| 4 | Liver  | Common in     | 11:6728 | CAB  |                                            | ENST0 | ENSP00  |     |    |       |       |     |       |       | high_im |       | high_impa |           |            |            |
|   | metas  | primary and   | 7539    | P2   | calcium binding protein 2                  | 00003 | 0003120 | 101 | R/ | Cgg/  | -     | 0   | 1     | NA    | 2.075   | pact  | 1.838     | ct        | NA         | NA         |
|   | tases  | metastatic    |         |      |                                            | 53903 | 37      |     | W  | Tgg   |       |     |       |       |         |       |           |           |            |            |
|   | tumors | tumors        |         |      |                                            |       |         |     |    |       |       |     |       |       |         |       |           |           |            |            |

|   |                  |                             |             |           |                                                                                  |                   |                   |     |      |          |            |      |     |       |       |                 |        |               |        |               |
|---|------------------|-----------------------------|-------------|-----------|----------------------------------------------------------------------------------|-------------------|-------------------|-----|------|----------|------------|------|-----|-------|-------|-----------------|--------|---------------|--------|---------------|
| 4 | Liver metastases | Private in metastatic tumor | 12:1989005  | CA A2D 4  | calcium channel, voltage-dependent, alpha 2/delta subunit 4                      | ENST0 00004 44595 | ENSP00 0004033 71 | 510 | V/ M | Gtg/ Atg | -          | 0 96 | 0.9 | NA    | 0.683 | mediu m_imp act | 1.594  | high_impact   | NA     | NA            |
| 4 | Liver metastases | Private in metastatic tumor | 2:27447926  | CA D      | carbamoyl-phosphate synthetase 2, aspartate transcarbamylase, and dihydroorotase | ENST0 00004 03525 | ENSP00 0003845 10 | 479 | Q/ E | Cag/ Gag | -          | 0 54 | 0.9 | NA    | 2.137 | high_impact     | 0.476  | medium_impact | NA     | NA            |
| 4 | Primary tumor    | Private in primary tumor    | 10:5541014  | CAL ML5   | calmodulin-like 5                                                                | ENST0 00003 80332 | ENSP00 0003696 89 | 130 | Q/ E | Cag/ Gag | -          | 0 27 | 0.1 | 0.895 | 2.075 | high_impact     | -0.291 | low_impact    | -0.148 | low_impact    |
| 4 | Liver metastases | Private in metastatic tumor | 5:179149927 | CA NX     | calnexin                                                                         | ENST0 00004 52673 | ENSP00 0003916 46 | 435 | F/ L | ttT/tt G | -          | 0 99 | 0.9 | 3.235 | 2.124 | high_impact     | 1.9    | high_impact   | 1.845  | medium_impact |
| 4 | Primary tumor    | Private in primary tumor    | 16:88958689 | CBF A2T 3 | core-binding factor, runt domain, alpha subunit 2                                | ENST0 00003 27483 | ENSP00 0003321 22 | 109 | I/S  | aTt/a Gt | -          | 0 06 | 0.1 | NA    | 2.066 | high_impact     | -0.301 | low_impact    | NA     | NA            |
| 4 | Liver metastases | Private in metastatic tumor | 11:93088655 | CC DC6 7  | coiled-coil domain containing 67                                                 | ENST0 00005 27307 | ENSP00 0004330 02 | 50  | R/ W | Cgg/ Tgg | -          | 0 98 | 0.9 | NA    | 2.355 | high_impact     | 2.187  | high_impact   | NA     | NA            |
| 4 | Liver metastases | Private in metastatic tumor | 7:75443027  | CCL 24    | chemokine (C-C motif) ligand 24                                                  | ENST0 00002 22902 | ENSP00 0002229 02 | 3   | G/ R | Ggc/ Cgc | -          | 0 4  | 0.9 | 2.2   | 2.023 | high_impact     | 0.854  | medium_impact | 1.161  | medium_impact |
| 4 | Liver metastases | Private in metastatic tumor | 1:100933556 | CD C14 A  | CDC14 cell division cycle 14 homolog A (S. cerevisiae)                           | ENST0 00005 44534 | ENSP00 0004425 43 | 295 | K/ E | Aaa/ Gaa | -          | 0 96 | 0.9 | NA    | 2.16  | high_impact     | 1.592  | high_impact   | NA     | NA            |
| 4 | Liver metastases | Private in metastatic tumor | 19:16636226 | CH ERP    | calcium homeostasis endoplasmic reticulum protein                                | ENST0 00005 46361 | ENSP00 0004398 56 | 8   | R/ P | cGg/ cCg | -          | 0 99 | 0.9 | NA    | 2.056 | high_impact     | 1.904  | high_impact   | NA     | NA            |
| 4 | Primary tumor    | Private in primary tumor    | 16:75563330 | CH ST5    | carbohydrate (N-acetylglucosamine 6-O) sulfotransferase 5                        | ENST0 00003       | ENSP00 0003387    | 318 | T/ M | aCg/ aTg | rs382 6107 | 0 97 | 0.9 | 2.61  | 0.651 | mediu m_imp     | 1.709  | high_impact   | 1.517  | medium_impact |



|   |                 |                                         |                 |                 |                                          |                         |                         |      |         |             |   |        |           |          |            |                 |                   |                     |                      |
|---|-----------------|-----------------------------------------|-----------------|-----------------|------------------------------------------|-------------------------|-------------------------|------|---------|-------------|---|--------|-----------|----------|------------|-----------------|-------------------|---------------------|----------------------|
|   | tumor           |                                         |                 |                 |                                          | 36257                   | 83                      |      |         |             | 0 |        |           |          |            | act             |                   |                     |                      |
|   |                 |                                         |                 |                 |                                          |                         |                         |      |         |             | 3 |        |           |          |            |                 |                   |                     |                      |
|   |                 |                                         |                 |                 |                                          |                         |                         |      |         |             | 0 |        |           |          |            |                 |                   |                     |                      |
| 4 | Liver metasases | Private in metastatic tumor             | 17:4084<br>1570 | CNT<br>NAP<br>1 | contactin associated protein 1           | ENST0<br>00002<br>64638 | ENSP00<br>0002646<br>38 | 554  | R/<br>C | Cgc/<br>Tgc | - | .<br>0 | 1         | 3.325    | 0.513      | m_imp<br>act    | 1.784<br>ct       | 2.545<br>act        | medium_imp<br>act    |
| 4 | Liver metasases | Private in metastatic tumor             | 1:36564<br>546  | COL<br>8A2      | collagen, type VIII, alpha 2             | ENST0<br>00004<br>81785 | ENSP00<br>0004364<br>33 | 181  | G/<br>R | Ggg/<br>Cgg | - | .<br>0 | 0         | NA       | 2.126      | high_im<br>pact | -1.576<br>ct      | low_impact<br>ct    | NA<br>NA             |
| 4 | Primary tumor   | Private in primary tumor                | 1:36564<br>545  | COL<br>8A2      | collagen, type VIII, alpha 2             | ENST0<br>00003<br>03143 | ENSP00<br>0003059<br>13 | 246  | G/<br>V | gGg/<br>gTg | - | .<br>0 | 0         | 4.05     | 2.126      | high_im<br>pact | -1.576<br>ct      | low_impact<br>ct    | 3.139<br>high_impact |
| 4 | Primary tumor   | Private in primary tumor                | 6:11675<br>7558 | DSE             | dermatan sulfate epimerase               | ENST0<br>00003<br>59564 | ENSP00<br>0003525<br>67 | 643  | G/<br>R | Ggg/<br>Cgg | - | .<br>2 | 0.9<br>95 | 1.78     | -0.22<br>6 | low_im<br>pact  | 1.52<br>ct        | high_impact<br>ct   | 0.279<br>low_impact  |
| 4 | Primary tumor   | Common in primary and metastatic tumors | 6:56437<br>837  | DST             | dystonin                                 | ENST0<br>00003<br>70769 | ENSP00<br>0003598<br>05 | 4212 | R/<br>H | cGt/c<br>At | - | N<br>A | 0.9<br>99 | NA<br>NA | NA<br>NA   | 1.936<br>ct     | high_impact<br>ct | NA<br>NA            |                      |
| 4 | Liver metasases | Common in primary and metastatic tumors | 6:56437<br>837  | DST             | dystonin                                 | ENST0<br>00004<br>21834 | ENSP00<br>0004008<br>83 | 2124 | R/<br>H | cGt/c<br>At | - | .<br>7 | 0.9<br>99 | NA<br>9  | -1.11<br>9 | low_im<br>pact  | 1.936<br>ct       | high_impact<br>ct   | NA<br>NA             |
| 4 | Liver metasases | Private in metastatic tumor             | 3:56330<br>129  | ER<br>C2<br>2   | ELKS/RAB6-interacting/CAST family member | ENST0<br>00004<br>60849 | ENSP00<br>0004174<br>45 | 331  | R/<br>Q | cGg/<br>cAg | - | .<br>0 | 0.9<br>81 | 1.735    | 2.051      | high_im<br>pact | 1.194<br>mpact    | 0.796<br>low_impact |                      |
| 4 | Liver metasases | Private in metastatic tumor             | 11:6408<br>3293 | ESR<br>RA       | estrogen-related receptor alpha          | ENST0<br>00005<br>45035 | ENSP00<br>0004447<br>10 | 157  | R/<br>L | cGg/<br>cTg | - | .<br>2 | 1         | NA       | -0.56<br>4 | low_im<br>pact  | 1.644<br>ct       | high_impact<br>ct   | NA<br>NA             |

|   |        |               |         |     |                                             |       |         |     |    |       |       |   |     |       |       |         |        |          | 5     |
|---|--------|---------------|---------|-----|---------------------------------------------|-------|---------|-----|----|-------|-------|---|-----|-------|-------|---------|--------|----------|-------|
| 4 | Liver  | Private in    | 11:6408 | ESR |                                             | ENST0 | ENSP00  |     |    |       |       |   |     |       |       |         |        |          |       |
|   | metas  | metastatic    | 3320    | RA  | estrogen-related receptor alpha             | 00005 | 0004447 | 166 | L/ | cTa/c | -     | 0 | NA  | NA    | 2.036 | high_im | NA     | NA       | NA    |
|   | tases  | tumor         |         |     |                                             | 45035 | 10      |     | P  | Ca    |       |   |     |       | pact  |         |        |          |       |
| 4 | Liver  | Private in    | 6:61775 | EX  |                                             | ENST0 | ENSP00  |     |    |       |       |   |     |       |       |         |        |          |       |
|   | metas  | metastatic    | 6       | OC2 | exocyst complex component 2                 | 00002 | 0002304 | 206 | K/ | Aaa/  | -     | 0 | 0.9 | 2.44  | 2.124 | high_im | 1.872  | high_imp | 1.38  |
|   | tases  | tumor         |         |     |                                             | 30449 | 49      |     | Q  | Caa   |       |   | 99  |       |       | pact    |        | ct       |       |
| 4 | Prima  | Common in     | 11:1084 | EXP |                                             | ENST0 | ENSP00  |     |    |       |       |   |     |       |       |         |        |          |       |
|   | ry     | primary and   | 09784   | H5  | exophilin 5                                 | 00004 | 0003919 | 61  | E/ | gAg/  | rs264 | 0 | 0.9 | NA    | 2.013 | high_im | 0.95   | medium_i | NA    |
|   | tumor  | metastatic    |         |     |                                             | 28840 | 66      |     | V  | gTg   | 0785  |   | 52  |       |       | pact    |        | mpact    |       |
|   | tumors | tumors        |         |     |                                             |       |         |     |    |       |       |   |     |       |       |         |        |          |       |
| 4 | Liver  | Common in     | 11:1084 | EXP |                                             | ENST0 | ENSP00  |     |    |       |       |   |     |       |       |         |        |          |       |
|   | metas  | primary and   | 09784   | H5  | exophilin 5                                 | 00005 | 0004325 | 130 | E/ | gAg/  | rs264 | 0 | 0.9 | NA    | 2.013 | high_im | 0.95   | medium_i | NA    |
|   | tases  | metastatic    |         |     |                                             | 25344 | 46      |     | V  | gTg   | 0785  |   | 52  |       |       | pact    |        | mpact    |       |
|   | tumors | tumors        |         |     |                                             |       |         |     |    |       |       |   |     |       |       |         |        |          |       |
| 4 | Liver  | Private in    | 11:6164 | FAD |                                             | ENST0 | ENSP00  |     |    |       |       |   |     |       |       |         |        |          |       |
|   | metas  | metastatic    | 3380    | S3  | fatty acid desaturase 3                     | 00005 | 0004322 | 382 | K/ | aAg/  |       | 0 | 1   | NA    | 1.848 | mediu   | 1.852  | high_imp | NA    |
|   | tases  | tumor         |         |     |                                             | 25588 | 06      |     | M  | aTg   |       |   |     |       |       | m_imp   |        | ct       |       |
|   | tumor  | tumor         |         |     |                                             |       |         |     |    |       |       |   |     |       |       | act     |        |          |       |
| 4 | Prima  | Private in    | 11:5889 | FA  |                                             | ENST0 | ENSP00  |     |    |       |       |   |     |       |       |         |        |          |       |
|   | ry     | primary tumor | 2351    | M11 | family with sequence similarity 111, member | 00004 | 0003938 | 231 | G/ | Gga/  |       | 0 | 0.9 | NA    | 2.034 | high_im | 1.425  | medium_i | NA    |
|   | tumor  | primary tumor |         | 1B  | B                                           | 11426 | 55      |     | R  | Aga   |       |   | 95  |       |       | pact    |        | mpact    |       |
| 4 | Prima  | Private in    | 1:18486 | FA  |                                             | ENST0 | ENSP00  |     |    |       |       | 0 | 0.9 | 2.045 | -0.17 | low_im  | 1.738  | high_imp | 1.097 |
|   | ry     | primary tumor | 8431    | M12 | family with sequence similarity 129, member | 00003 | 0003564 | 23  | A/ | Gct/  |       | . |     |       | 1     | pact    |        | ct       |       |
|   | tumor  | primary tumor |         | 9A  | A                                           | 67511 | 81      |     | T  | Act   |       | 2 | 98  |       |       |         |        |          | act   |
| 4 | Prima  | Private in    | 6:71162 | FA  |                                             | ENST0 | ENSP00  |     |    |       |       |   |     |       |       |         |        |          |       |
|   | ry     | primary tumor | 209     | M13 | family with sequence similarity 135, member | 00001 | 0001946 | 31  | R/ | cGt/c |       | 0 | 0.9 | NA    | 2.929 | high_im | 1.512  | high_imp | NA    |
|   | tumor  | primary tumor |         | 5A  | A                                           | 94672 | 72      |     | H  | At    |       |   | 97  |       |       | pact    |        | ct       |       |
| 4 | Liver  | Private in    | 5:17553 | FA  |                                             | ENST0 | ENSP00  |     |    |       |       |   |     |       |       |         |        |          |       |
|   | metas  | metastatic    | 5644    | M15 | family with sequence similarity 153, member | 00005 | 0004248 | 223 | Q/ | cAg/  |       | 0 | 0.2 | NA    | 2.929 | high_im | -0.167 | low_imp  | NA    |
|   | tases  | tumor         |         | 3B  | B                                           | 08296 | 49      |     | P  | cCg   |       |   | 87  |       |       | pact    |        | ct       |       |

|   |                      |                                                  |                  |                |                                                                                |                |                   |     |         |             |               |         |           |                |                       |       |                   |       |                   |
|---|----------------------|--------------------------------------------------|------------------|----------------|--------------------------------------------------------------------------------|----------------|-------------------|-----|---------|-------------|---------------|---------|-----------|----------------|-----------------------|-------|-------------------|-------|-------------------|
| 4 | Prima<br>ry<br>tumor | Private in<br>primary tumor                      | 19:8191<br>415   | FBN<br>3       | fibrillin 3                                                                    | ENST0<br>00002 | ENSP00<br>0002705 | 831 | R/<br>W | Cgg/<br>Tgg | -<br>-        | 0<br>0  | 0.9<br>99 | 2.045<br>2.145 | high_im<br>pact       | 1.824 | high_imp<br>ct    | 0.813 | low_impact        |
| 4 | metas<br>tases       | Private in<br>metastatic<br>tumor                | 1:27939<br>784   | FG<br>R        | Gardner-Rasheed feline sarcoma viral (v-fgr)<br>oncogene homolog               | ENST0<br>00003 | ENSP00<br>0003631 | 443 | S/<br>P | Tcc/<br>Ccc | -<br>-        | 0<br>99 | 0.9<br>99 | 4<br>1.992     | mediu<br>m_imp<br>act | 1.866 | high_imp<br>ct    | 2.922 | medium_imp<br>act |
| 4 | metas<br>tases       | Private in<br>metastatic<br>tumor                | 1:15227<br>8814  | FLG            | filaggrin                                                                      | ENST0<br>00003 | ENSP00<br>0003577 | 112 | G/<br>S | Ggc/<br>Agc | rs218<br>4952 | .<br>6  | 0.9<br>98 | NA<br>2        | low_im<br>pact        | 1.515 | high_imp<br>ct    | NA    | NA                |
| 4 | metas<br>tases       | Private in<br>metastatic<br>tumor                | 12:5003<br>9615  | FM<br>NL3      | formin-like 3                                                                  | ENST0<br>00003 | ENSP00<br>0003443 | 972 | A/<br>P | Gct/<br>Cct | -<br>-        | 0<br>38 | 0.4<br>38 | NA<br>2.122    | high_im<br>pact       | 0.028 | medium_i<br>mpact | NA    | NA                |
| 4 | metas<br>tases       | Private in<br>metastatic<br>tumor                | 11:6240<br>2393  | GA<br>NAB      | glucosidase, alpha                                                             | ENST0<br>00005 | ENSP00<br>0004348 | 40  | R/<br>W | Cgg/<br>Tgg | rs227<br>6296 | 0<br>82 | 0.9<br>82 | NA<br>2.215    | high_im<br>pact       | 2.57  | high_imp<br>ct    | NA    | NA                |
| 4 | Prima<br>ry<br>tumor | Private in<br>primary tumor                      | 1:15578<br>3537  | GO<br>N4L      | gon-4-like (C. elegans)                                                        | ENST0<br>00005 | ENSP00<br>0004440 | 447 | G/<br>A | gGg/<br>gCg | -<br>-        | 0<br>8  | 0.9<br>98 | NA<br>0.28     | mediu<br>m_imp<br>act | 1.829 | high_imp<br>ct    | NA    | NA                |
| 4 | metas<br>tases       | Private in<br>metastatic<br>tumor                | 10:1011<br>63286 | GO<br>T1       | glutamic-oxaloacetic transaminase 1, soluble<br>(aspartate aminotransferase 1) | ENST0<br>00005 | ENSP00<br>0004406 | 253 | P/<br>R | cCc/<br>cGc | -<br>-        | 0<br>1  | 1<br>NA   | 2.132          | high_im<br>pact       | 2.19  | high_imp<br>ct    | NA    | NA                |
| 4 | Prima<br>ry<br>tumor | Common in<br>primary and<br>metastatic<br>tumors | 6:31630<br>315   | GP<br>ANK<br>1 | G patch domain and ankyrin repeats 1                                           | ENST0<br>00003 | ENSP00<br>0003650 | 267 | G/<br>R | Ggc/<br>Cgc | -<br>-        | 0<br>99 | 0.9<br>99 | 3.805<br>2.084 | high_im<br>pact       | 1.992 | high_imp<br>ct    | 2.542 | medium_imp<br>act |
| 4 | metas<br>tases       | Common in<br>primary and<br>metastatic           | 6:31630<br>315   | GP<br>ANK<br>1 | G patch domain and ankyrin repeats 1                                           | ENST0<br>00003 | ENSP00<br>0003650 | 267 | G/<br>R | Ggc/<br>Cgc | -<br>-        | 0<br>99 | 0.9<br>99 | 3.805<br>2.084 | high_im<br>pact       | 1.992 | high_imp<br>ct    | 2.542 | medium_imp<br>act |

| tumors |                  |                                         |                 |                 |                                                              |                         |                         |      |         |             |               |   |           |       |       |                       |        |                   |        |                   |
|--------|------------------|-----------------------------------------|-----------------|-----------------|--------------------------------------------------------------|-------------------------|-------------------------|------|---------|-------------|---------------|---|-----------|-------|-------|-----------------------|--------|-------------------|--------|-------------------|
| 4      | Liver metastases | Private in metastatic tumor             | X:15322<br>0581 | HCF<br>C1       | host cell factor C1 (VP16-accessory protein)                 | ENST0<br>00003<br>69984 | ENSP00<br>0003590<br>01 | 1090 | T/<br>S | aCc/<br>aGc | -             | 0 | 0.8<br>08 | NA    | 2.033 | high_im<br>pact       | 0.467  | medium_i<br>mpact | NA     | NA                |
| 4      | Primary tumor    | Private in primary tumor                | 5:13708<br>9679 | HN<br>RN<br>PA0 | heterogeneous nuclear ribonucleoprotein A0                   | ENST0<br>00003<br>14940 | ENSP00<br>0003160<br>42 | 26   | H/<br>L | cAc/c<br>Tc | -             | 0 | 0.8<br>29 | 0.515 | 2.056 | high_im<br>pact       | 0.597  | medium_i<br>mpact | -0.596 | low_impact        |
| 4      | Primary tumor    | Private in primary tumor                | 5:13708<br>9673 | HN<br>RN<br>PA0 | heterogeneous nuclear ribonucleoprotein A0                   | ENST0<br>00003<br>14940 | ENSP00<br>0003160<br>42 | 28   | E/<br>V | gAg/<br>gTg | -             | 0 | 0.3<br>82 | 2.265 | 2.056 | high_im<br>pact       | 0.093  | medium_i<br>mpact | 1.215  | medium_imp<br>act |
| 4      | Primary tumor    | Common in primary and metastatic tumors | 22:3882<br>3596 | KC<br>NJ4       | potassium inwardly-rectifying channel, subfamily J, member 4 | ENST0<br>00003<br>03592 | ENSP00<br>0003064<br>97 | 181  | R/<br>Q | cGg/<br>cAg | -             | 0 | 0.9<br>99 | 3.095 | 1.995 | mediu<br>m_imp<br>act | 1.753  | high_imp<br>act   | 1.843  | medium_imp<br>act |
| 4      | Liver metastases | Common in primary and metastatic tumors | 22:3882<br>3596 | KC<br>NJ4       | potassium inwardly-rectifying channel, subfamily J, member 4 | ENST0<br>00003<br>03592 | ENSP00<br>0003064<br>97 | 181  | R/<br>Q | cGg/<br>cAg | -             | 0 | 0.9<br>99 | 3.095 | 1.995 | mediu<br>m_imp<br>act | 1.753  | high_imp<br>act   | 1.843  | medium_imp<br>act |
| 4      | Primary tumor    | Private in primary tumor                | 21:4599<br>9653 | KRT<br>AP1      | keratin associated protein 10-5                              | ENST0<br>00004<br>00372 | ENSP00<br>0003832<br>23 | 268  | R/<br>P | cGc/<br>cCc | rs464<br>391  | 0 | 0.9<br>98 | 2.6   | 2.929 | high_im<br>pact       | 1.613  | high_imp<br>act   | 1.859  | medium_imp<br>act |
| 4      | Liver metastases | Private in metastatic tumor             | 21:4608<br>6731 | KRT<br>AP1      | keratin associated protein 12-2                              | ENST0<br>00005<br>39483 | ENSP00<br>0004395<br>31 | 25   | C/<br>R | Tgc/<br>Cgc | -             | 0 | 0         | NA    | 2.929 | high_im<br>pact       | -1.667 | low_imp<br>act    | NA     | NA                |
| 4      | Primary tumor    | Private in primary tumor                | 15:7421<br>9546 | LOX<br>L1       | lysyl oxidase-like 1                                         | ENST0<br>00003<br>95162 | ENSP00<br>0003785<br>91 | 3    | R/<br>L | cGg/<br>cTg | rs104<br>8661 | 0 | 0.9<br>44 | NA    | 2.235 | high_im<br>pact       | 0.329  | medium_i<br>mpact | NA     | NA                |
| 4      | Primary tumor    | Private in primary tumor                | 1:82447<br>538  | LPH<br>N2       | latrophilin 2                                                | ENST0<br>00003<br>35786 | ENSP00<br>0003373<br>06 | 1050 | T/<br>A | Acc/<br>Gcc | -             | 0 | 0.9<br>93 | 3.385 | 1.32  | mediu<br>m_imp<br>act | 2.033  | high_imp<br>act   | 4.354  | high_impact       |

|   |                         |                                   |                 |                  |                                                                |                         |                         |      |         |             |               |         |           |       |       |                       |        |                   |       | 1                 |
|---|-------------------------|-----------------------------------|-----------------|------------------|----------------------------------------------------------------|-------------------------|-------------------------|------|---------|-------------|---------------|---------|-----------|-------|-------|-----------------------|--------|-------------------|-------|-------------------|
| 4 | Prima<br>ry<br>tumor    | Private in<br>primary tumor       | 12:8543<br>2040 | LRR<br>IQ1       | leucine-rich repeats and IQ motif containing 1                 | ENST0<br>00003<br>93217 | ENSP00<br>0003769<br>10 | 29   | I/<br>N | aTt/a<br>At | rs731<br>2075 | 0<br>63 | 0.3<br>63 | NA    | 2.062 | high_im<br>pact       | 0.068  | medium_i<br>mpact | NA    | NA                |
| 4 | Prima<br>ry<br>tumor    | Private in<br>primary tumor       | 14:2478<br>5656 | LTB<br>4R        | leukotriene B4 receptor                                        | ENST0<br>00003<br>96789 | ENSP00<br>0003800<br>08 | 267  | R/<br>C | Cgc/<br>Tgc | -<br>-        | 0<br>0  | 1         | 2.835 | 1.711 | mediu<br>m_imp<br>act | 2.18   | high_imp<br>act   | 1.768 | medium_imp<br>act |
| 4 | Prima<br>ry<br>tumor    | Private in<br>primary tumor       | 15:4180<br>4049 | LTK              | leukocyte receptor tyrosine kinase                             | ENST0<br>00003<br>55166 | ENSP00<br>0003472<br>93 | 208  | G/<br>D | gGc/<br>gAc | -<br>-        | 0<br>98 | 0.9<br>98 | NA    | 2.223 | high_im<br>pact       | 1.733  | high_imp<br>act   | NA    | NA                |
| 4 | Liver<br>metas<br>tases | Private in<br>metastatic<br>tumor | 4:15628<br>9917 | MA<br>P9         | microtubule-associated protein 9                               | ENST0<br>00005<br>15654 | ENSP00<br>0004274<br>02 | 177  | R/<br>W | Cgg/<br>Tgg | rs373<br>3391 | 0<br>98 | 0.9<br>98 | NA    | 2.929 | high_im<br>pact       | 1.613  | high_imp<br>act   | NA    | NA                |
| 4 | Liver<br>metas<br>tases | Private in<br>metastatic<br>tumor | 3:50654<br>997  | MA<br>PKA<br>PK3 | mitogen-activated protein kinase-activated<br>protein kinase 3 | ENST0<br>00004<br>30409 | ENSP00<br>0004109<br>70 | 1    | M/<br>V | Atg/<br>Gtg | -<br>-        | 0<br>07 | 0.0<br>07 | NA    | 2.322 | high_im<br>pact       | -1.069 | low_imp<br>act    | NA    | NA                |
| 4 | Prima<br>ry<br>tumor    | Private in<br>primary tumor       | 6:30672<br>332  | MD<br>C1         | mediator of DNA-damage checkpoint 1                            | ENST0<br>00003<br>76406 | ENSP00<br>0003655<br>88 | 1543 | T/<br>R | aCa/<br>aGa | -<br>-        | 0<br>74 | 0.9<br>74 | 2.175 | 0.916 | mediu<br>m_imp<br>act | 1.087  | medium_i<br>mpact | 3.656 | high_impact       |
| 4 | Prima<br>ry<br>tumor    | Private in<br>primary tumor       | 6:30672<br>335  | MD<br>C1         | mediator of DNA-damage checkpoint 1                            | ENST0<br>00004<br>20817 | ENSP00<br>0004117<br>75 | 190  | P/<br>A | Cca/<br>Gca | -<br>-        | 0<br>0  | 0         | NA    | 2.082 | high_im<br>pact       | -1.654 | low_imp<br>act    | NA    | NA                |
| 4 | Liver<br>metas<br>tases | Private in<br>metastatic<br>tumor | 6:30672<br>257  | MD<br>C1         | mediator of DNA-damage checkpoint 1                            | ENST0<br>00004<br>22104 | ENSP00<br>0003903<br>75 | 1134 | P/<br>H | cCt/c<br>At | -<br>-        | 0<br>99 | 0.9<br>99 | NA    | 2.082 | high_im<br>pact       | 1.942  | high_imp<br>act   | NA    | NA                |
| 4 | Liver<br>metas<br>tases | Private in<br>metastatic<br>tumor | 6:30672<br>257  | MD<br>C1         | mediator of DNA-damage checkpoint 1                            | ENST0<br>00004<br>20817 | ENSP00<br>0004117<br>75 | 216  | L/<br>M | Ctg/<br>Atg | -<br>-        | 0<br>0  | 0         | NA    | 2.082 | high_im<br>pact       | -1.654 | low_imp<br>act    | NA    | NA                |

|   |                         |                                                  |                 |                |                                                         |                         |                         |      |         |             |                |        |           |       |       |                       |       |                   |       |                   |
|---|-------------------------|--------------------------------------------------|-----------------|----------------|---------------------------------------------------------|-------------------------|-------------------------|------|---------|-------------|----------------|--------|-----------|-------|-------|-----------------------|-------|-------------------|-------|-------------------|
| 4 | Prima<br>ry<br>tumor    | Private in<br>primary tumor                      | 6:30672<br>335  | MD<br>C1       | mediator of DNA-damage checkpoint 1                     | ENST0<br>00003<br>76405 | ENSP00<br>0003655<br>87 | 1278 | S/<br>C | tCc/t<br>Gc | -<br>-         | 0<br>0 | 0.9<br>48 | NA    | 2.082 | high_im<br>pact       | 0.9   | medium_i<br>mpact | NA    | NA                |
| 4 | Prima<br>ry<br>tumor    | Common in<br>primary and<br>metastatic<br>tumors | 17:2743<br>8469 | MY<br>O18<br>A | myosin XVIIIIA                                          | ENST0<br>00005<br>27372 | ENSP00<br>0004370<br>73 | 958  | A/<br>V | gCc/<br>gTc | rs807<br>6604  | .<br>0 | 0.9<br>97 | NA    | 0.444 | mediu<br>m_imp<br>act | 1.502 | high_imp<br>act   | NA    | NA                |
| 4 | Liver<br>metas<br>tases | Common in<br>primary and<br>metastatic<br>tumors | 17:2743<br>8469 | MY<br>O18<br>A | myosin XVIIIIA                                          | ENST0<br>00003<br>54682 | ENSP00<br>0003467<br>13 | 627  | A/<br>V | gCc/<br>gTc | rs807<br>6604  | 0<br>0 | 0.6<br>81 | NA    | 2.001 | high_im<br>pact       | 0.265 | medium_i<br>mpact | NA    | NA                |
| 4 | Prima<br>ry<br>tumor    | Private in<br>primary tumor                      | 16:3614<br>345  | NLR<br>C3      | NLR family, CARD domain containing 3                    | ENST0<br>00003<br>59128 | ENSP00<br>0003520<br>39 | 198  | F/<br>S | tTc/t<br>Cc | -<br>-         | 0<br>0 | 0.8<br>39 | NA    | 2.064 | high_im<br>pact       | 0.607 | medium_i<br>mpact | NA    | NA                |
| 4 | Liver<br>metas<br>tases | Private in<br>metastatic<br>tumor                | 16:1368<br>55   | NP<br>RL3      | nitrogen permease regulator-like 3 (S.<br>cerevisiae)   | ENST0<br>00003<br>99953 | ENSP00<br>0003828<br>34 | 519  | F/<br>Y | tTc/t<br>Ac | -<br>-         | .<br>0 | 0.9<br>96 | NA    | 1.128 | mediu<br>m_imp<br>act | 1.566 | high_imp<br>act   | NA    | NA                |
| 4 | Prima<br>ry<br>tumor    | Common in<br>primary and<br>metastatic<br>tumors | 16:5687<br>1605 | NU<br>P93      | nucleoporin 93kDa                                       | ENST0<br>00003<br>08159 | ENSP00<br>0003106<br>68 | 662  | R/<br>K | aGg/<br>aAg | -<br>-         | 0<br>0 | 0.9<br>97 | 2.69  | 2.062 | high_im<br>pact       | 1.625 | high_imp<br>act   | 1.755 | medium_imp<br>act |
| 4 | Liver<br>metas<br>tases | Common in<br>primary and<br>metastatic<br>tumors | 16:5687<br>1605 | NU<br>P93      | nucleoporin 93kDa                                       | ENST0<br>00003<br>08159 | ENSP00<br>0003106<br>68 | 662  | R/<br>K | aGg/<br>aAg | -<br>-         | 0<br>0 | 0.9<br>97 | 2.69  | 2.062 | high_im<br>pact       | 1.625 | high_imp<br>act   | 1.755 | medium_imp<br>act |
| 4 | Prima<br>ry<br>tumor    | Private in<br>primary tumor                      | 1:24884<br>4959 | OR1<br>411     | olfactory receptor, family 14, subfamily 1,<br>member 1 | ENST0<br>00003<br>42623 | ENSP00<br>0003397<br>26 | 216  | Y/<br>C | tAt/t<br>Gt | rs558<br>71516 | 0<br>0 | 1<br>1    | 4.43  | 1.67  | mediu<br>m_imp<br>act | 1.724 | high_imp<br>act   | 1.913 | medium_imp<br>act |
| 4 | Prima<br>ry<br>tumor    | Common in<br>primary tumor                       | 21:4780         | PC             | pericentrin                                             | ENST0                   | ENSP00                  | 1163 | R/      | Cgc/        | rs727          | 0      | 1         | 1.935 | 2.438 | high_im               | 2.056 | high_imp          | 0.906 | low_impact        |

|   |        |               |         |     |                                            |  |       |         |      |     |       |       |   |     |       |         |         |          |          |          |            |    |
|---|--------|---------------|---------|-----|--------------------------------------------|--|-------|---------|------|-----|-------|-------|---|-----|-------|---------|---------|----------|----------|----------|------------|----|
|   | ry     | primary and   | 8679    | NT  |                                            |  | 00003 | 0003525 | C    | Tgc | 9204  |       |   |     |       | pact    |         | ct       |          |          |            |    |
|   | tumor  | metastatic    |         |     |                                            |  | 59568 | 72      |      |     |       |       |   |     |       |         |         |          |          |          |            |    |
|   |        | tumors        |         |     |                                            |  |       |         |      |     |       |       |   |     |       |         |         |          |          |          |            |    |
|   | Liver  | Common in     |         |     |                                            |  | ENST0 | ENSP00  |      |     |       |       |   |     |       |         |         |          |          |          |            |    |
| 4 | metas  | primary and   | 21:4780 | PC  |                                            |  | 00003 | 0003525 | 1163 | R/  | Cgc/  | rs727 |   |     |       | high_im |         | high_imp |          |          |            |    |
|   | tases  | metastatic    | 8679    | NT  | pericentrin                                |  | 00003 | 0003525 | 1163 | C   | Tgc   | 9204  | 0 | 1   | 1.935 | 2.438   | pact    | 2.056    | ct       | 0.906    | low_impact |    |
|   | tumors |               |         |     |                                            |  | 59568 | 72      |      |     |       |       |   |     |       |         |         |          |          |          |            |    |
|   | Prima  | Private in    | 1:14488 | PDE |                                            |  | ENST0 | ENSP00  |      |     |       |       |   |     |       |         | mediu   |          | high_imp |          |            |    |
| 4 | ry     | primary tumor | 0814    | 4DI | phosphodiesterase 4D interacting protein   |  | 00005 | 0004356 | 1408 | L/  | Ctc/T | rs174 | . | 0.9 |       |         | m_imp   | 1.521    | ct       | NA       | NA         |    |
|   | tumor  |               |         | P   |                                            |  | 30740 | 54      |      | F   | tc    | 7960  | 0 | 96  |       |         | act     |          |          |          |            |    |
|   | Prima  | Private in    | 12:7642 | PHL | pleckstrin homology-like domain, family A, |  | ENST0 | ENSP00  |      |     |       |       |   |     |       |         |         | high_im  |          | medium_i |            |    |
| 4 | ry     | primary tumor | 5160    | DA1 | member 1                                   |  | 00002 | 0002666 | 121  | P/  | cCg/  | -     | 0 | 75  | 1.04  | 2.062   | pact    | 1.101    | mpact    | 0.024    | low_impact |    |
|   | tumor  |               |         |     |                                            |  | 66671 | 71      |      | R   | cGg   |       |   |     |       |         |         |          |          |          |            |    |
|   | Liver  | Private in    | 17:3722 | PLX |                                            |  | ENST0 | ENSP00  |      |     |       |       |   |     |       |         |         |          |          |          |            |    |
| 4 | metas  | metastatic    | 4211    | DC1 | plexin domain containing 1                 |  | 00004 | 0004096 | 422  | R/  | cGt/c | rs751 | . | 0.9 |       |         | low_im  |          | high_imp |          |            |    |
|   | tases  | tumor         |         |     |                                            |  | 44911 | 87      |      | H   | At    | 17355 | 3 | 97  | NA    | -0.51   | 6       | pact     | 1.637    | ct       | NA         | NA |
|   | Liver  | Private in    | 8:12842 | PO  |                                            |  | ENST0 | ENSP00  |      |     |       |       |   |     |       |         |         |          |          |          |            |    |
| 4 | metas  | metastatic    | 8245    | U5F | POU class 5 homeobox 1B                    |  | 00003 | 0003755 | 45   | P/  | cCa/  | -     | 0 | 06  | 1.78  | 2.056   | high_im |          | low_imp  |          |            |    |
|   | tases  | tumor         |         | 1B  |                                            |  | 91675 | 57      |      | R   | cGa   |       |   |     |       |         | pact    | -0.34    | ct       | 0.705    | low_impact |    |
|   | Prima  | Private in    | X:11442 | RB  |                                            |  | ENST0 | ENSP00  |      |     |       |       |   |     |       |         |         |          |          |          |            |    |
| 4 | ry     | primary tumor | 6145    | MXL | RNA binding motif protein, X-linked-like 3 |  | 00004 | 0004174 | 714  | H/  | cAc/c | -     | 0 | 0   | 0     | 2.056   | high_im |          | low_imp  |          |            |    |
|   | tumor  |               |         | 3   |                                            |  | 24776 | 51      |      | R   | Gc    |       |   |     |       |         | pact    | -1.483   | ct       | -1.129   | low_impact |    |
|   | Liver  | Private in    | 1:24859 | RC  |                                            |  | ENST0 | ENSP00  |      |     |       |       |   |     |       |         |         |          |          |          |            |    |
| 4 | metas  | metastatic    | 618     | AN3 | RCAN family member 3                       |  | 00005 | 0004454 | 81   | P/  | Ccc/  | -     | 0 | 1   | NA    | 1.631   | mediu   |          | high_imp |          |            |    |
|   | tases  | tumor         |         |     |                                            |  | 38532 | 01      |      | T   | Acc   |       |   |     |       |         | m_imp   | 1.515    | ct       | NA       | NA         |    |
|   | Prima  | Common in     | 5:96513 | RIO |                                            |  | ENST0 | ENSP00  |      |     |       |       |   |     |       |         |         |          |          |          |            |    |
| 4 | ry     | primary and   | 471     | K2  | RIO kinase 2 (yeast)                       |  | 00005 | 0004209 | 96   | S/  | tCt/t | rs254 | 0 | 98  | NA    | 2.008   | high_im |          | high_imp |          |            |    |
|   | tumor  | metastatic    |         |     |                                            |  | 08447 | 32      |      | C   | Gt    | 4773  |   |     |       |         | pact    | 1.861    | ct       | NA       | NA         |    |

|   |       |               |         |     |                                      |       |         |      |    |       |       |   |     |       |       |             |        |               |               |
|---|-------|---------------|---------|-----|--------------------------------------|-------|---------|------|----|-------|-------|---|-----|-------|-------|-------------|--------|---------------|---------------|
|   |       | tumors        |         |     |                                      |       |         |      |    |       |       |   |     |       |       |             |        |               |               |
|   | Liver | Common in     |         |     |                                      |       |         |      |    |       |       |   |     |       |       |             |        |               |               |
| 4 | metas | primary and   | 5:96513 | RIO |                                      | ENST0 | ENSP00  |      |    |       |       |   |     |       |       |             |        |               |               |
|   | tases | metastatic    | 471     | K2  | RIO kinase 2 (yeast)                 | 00005 | 0004209 | 96   | S/ | tCt/t | rs254 | 0 | 0.9 | NA    | 2.008 | high_im     | 1.861  | high_impact   | NA            |
|   |       | tumors        |         |     |                                      | 08447 | 32      |      | C  | Gt    | 4773  |   | 98  |       |       |             |        |               |               |
|   |       |               |         |     |                                      |       |         |      |    |       |       | 0 |     |       |       |             |        |               |               |
| 4 | ry    | Private in    | 16:3077 | RNF |                                      | ENST0 | ENSP00  |      |    |       |       |   |     |       |       |             |        |               |               |
|   | tumor | primary tumor | 6791    | 40  | ring finger protein 40               | 00003 | 0003256 | 322  | G/ | Ggg/  | -     | . | 0.9 | 2.36  | 1.53  | m_impact    | 1.598  | high_impact   | 1.361         |
|   |       |               |         |     |                                      | 24685 | 77      |      | W  | Tgg   |       | 0 | 88  |       |       |             |        |               | medium_impact |
|   |       |               |         |     |                                      |       |         |      |    |       |       | 1 |     |       |       |             |        |               |               |
| 4 | metas | Private in    | 19:3899 | RY  |                                      | ENST0 | ENSP00  |      |    |       |       |   |     |       |       |             |        |               |               |
|   | tases | metastatic    | 6563    | R1  | ryanodine receptor 1 (skeletal)      | 00003 | 0003526 | 2840 | R/ | Cgg/  | CM06  | N | 0.9 | 2.52  | NA    | NA          | 1.557  | high_impact   | 0.531         |
|   |       | tumor         |         |     |                                      | 59596 | 08      |      | W  | Tgg   | 4237  | A | 98  |       |       |             |        |               | low_impact    |
| 4 | metas | Private in    | 14:2199 | SAL |                                      | ENST0 | ENSP00  |      |    |       |       |   |     |       |       |             |        |               |               |
|   | tases | metastatic    | 1967    | L2  | sal-like 2 (Drosophila)              | 00005 | 0004400 | 491  | Q/ | cAg/  | -     | 0 | 0.7 | NA    | 2.089 | high_impact | 0.542  | medium_impact | NA            |
|   |       | tumor         |         |     |                                      | 46363 | 54      |      | L  | cTg   |       |   | 82  |       |       |             |        |               | NA            |
| 4 | ry    | Private in    | 19:5015 | SCA |                                      | ENST0 | ENSP00  |      |    |       |       |   |     |       |       |             |        |               |               |
|   | tumor | primary tumor | 4971    | F1  | SR-related CTD-associated factor 1   | 00003 | 0003537 | 442  | E/ | gAg/  | -     | 0 | 0   | 0.55  | 2.01  | high_impact | -1.543 | low_impact    | -0.459        |
|   |       |               |         |     |                                      | 60565 | 69      |      | G  | gGg   |       |   |     |       |       |             |        |               | low_impact    |
| 4 | ry    | Common in     | 1:16967 | SEL |                                      | ENST0 | ENSP00  |      |    |       |       |   |     |       |       |             |        |               |               |
|   | tumor | primary and   | 3838    | L   | selectin L                           | 00002 | 0002361 | 226  | P/ | Cct/T | rs222 | . | 0.9 | NA    | 0.608 | m_impact    | 1.81   | high_impact   | NA            |
|   |       | metastatic    |         |     |                                      | 36147 | 47      |      | S  | ct    | 9569  | 0 | 99  |       |       |             |        |               | NA            |
|   |       | tumors        |         |     |                                      |       |         |      |    |       |       | 5 |     |       |       |             |        |               |               |
| 4 | metas | Common in     | 1:16967 | SEL |                                      | ENST0 | ENSP00  |      |    |       |       |   |     |       |       |             |        |               |               |
|   | tases | primary and   | 3838    | L   | selectin L                           | 00002 | 0002361 | 226  | P/ | Cct/T | rs222 | . | 0.9 | NA    | 0.608 | m_impact    | 1.81   | high_impact   | NA            |
|   |       | metastatic    |         |     |                                      | 36147 | 47      |      | S  | ct    | 9569  | 0 | 99  |       |       |             |        |               | NA            |
|   |       | tumors        |         |     |                                      |       |         |      |    |       |       | 5 |     |       |       |             |        |               |               |
| 4 | metas | Private in    | 6:10083 | SIM |                                      | ENST0 | ENSP00  |      |    |       |       |   |     |       |       |             |        |               |               |
|   | tases | metastatic    | 8568    | 1   | single-minded homolog 1 (Drosophila) | 00002 | 0002629 | 657  | R/ | cGg/  | -     | 0 | 0.9 | 0.695 | 2.056 | high_impact | 1.038  | medium_impact | -0.367        |
|   |       | tumor         |         |     |                                      | 62901 | 01      |      | Q  | cAg   |       |   | 66  |       |       |             |        |               | low_impact    |
| 4 | Liver | Private in    | 22:3148 | SM  | smoothelin                           | ENST0 | ENSP00  | 292  | G/ | Gga/  | -     | 0 | 0.0 | NA    | 2.062 | high_impact | -1.089 | low_impact    | NA            |



|   |        |               |         |     |                                     |       |         |      |    |       |       |    |     |       |       |         |         |          |       |            |
|---|--------|---------------|---------|-----|-------------------------------------|-------|---------|------|----|-------|-------|----|-----|-------|-------|---------|---------|----------|-------|------------|
|   | metas  | metastatic    | 6802    | TN  |                                     | 00003 | 0003293 |      | R  | Cga   |       | 05 |     |       | pact  |         | ct      |          |       |            |
|   | tases  | tumor         |         |     |                                     | 29852 | 93      |      |    |       |       |    |     |       |       |         |         |          |       |            |
|   | Liver  | Private in    |         |     |                                     | ENST0 | ENSP00  |      |    |       |       |    |     |       |       |         |         |          |       |            |
| 4 | metas  | metastatic    | 1:11851 | SPA | sperm associated antigen 17         | 00004 | 0004027 | 540  | S/ | Tct/A | -     | 0  | 0.9 | NA    | 2.929 | high_im | 1.299   | medium_i | NA    | NA         |
|   | tases  | tumor         | 4634    | G17 |                                     |       |         |      | T  | ct    |       |    |     |       |       | pact    |         | mpact    |       |            |
|   |        |               |         |     |                                     |       |         |      |    |       |       |    |     |       |       |         |         |          |       |            |
|   | Liver  | Private in    |         |     |                                     | ENST0 | ENSP00  |      |    |       | rs116 | 0  |     |       |       |         | mediu   |          |       |            |
| 4 | metas  | metastatic    | 2:22033 | SPE | SPEG complex locus                  | 00002 | 0002653 | 1310 | D/ | Gac/  | 91125 | .  | 0.9 | NA    | 0.831 | m_imp   | 1.627   | high_imp | NA    | NA         |
|   | tases  | tumor         | 7041    | G   |                                     |       |         |      | N  | Aac   | 0     | 0  | 97  |       |       |         | act     | ct       |       |            |
|   |        |               |         |     |                                     |       |         |      |    |       | 0     |    |     |       |       |         |         |          |       |            |
|   | Prima  | Private in    | 9:13138 | SPT | spectrin, alpha, non-erythrocytic 1 | ENST0 | ENSP00  |      | D/ | gAc/  |       |    | 0.9 |       |       |         | high_im |          |       |            |
| 4 | ry     | primary tumor | 8058    | AN1 | (alpha-fodrin)                      | 00003 | 0003618 | 2002 | V  | gTc   | -     | 0  | 81  | NA    | 2.111 |         | 1.154   | medium_i | NA    | NA         |
|   | tumor  |               |         |     |                                     |       |         |      |    |       |       |    |     |       |       |         | pact    |          | mpact |            |
|   |        |               |         |     |                                     |       |         |      |    |       |       |    |     |       |       |         |         |          |       |            |
|   | Prima  | Common in     |         |     |                                     | ENST0 | ENSP00  |      |    |       |       |    |     |       |       |         |         |          |       |            |
| 4 | ry     | primary and   | 6:10931 | SYC | synaptonemal complex protein 2-like | 00002 | 0002831 | 547  | P/ | Cca/  | -     | 0  | 0.0 | 2.095 | 2.929 | high_im |         | low_imp  | 1.306 | medium_imp |
|   | tumor  | metastatic    | 678     | P2L |                                     |       |         |      | A  | Gca   |       |    | 7   |       |       |         | pact    | -0.587   | ct    | act        |
|   | tumors |               |         |     |                                     |       |         |      |    |       |       |    |     |       |       |         |         |          |       |            |
|   |        |               |         |     |                                     |       |         |      |    |       |       |    |     |       |       |         |         |          |       |            |
|   | Liver  | Common in     |         |     |                                     | ENST0 | ENSP00  |      |    |       |       |    |     |       |       |         |         |          |       |            |
| 4 | metas  | primary and   | 6:10931 | SYC | synaptonemal complex protein 2-like | 00002 | 0002831 | 547  | P/ | Cca/  | -     | 0  | 0.0 | 2.095 | 2.929 | high_im |         | low_imp  | 1.306 | medium_imp |
|   | tases  | metastatic    | 678     | P2L |                                     |       |         |      | A  | Gca   |       |    | 7   |       |       |         | pact    | -0.587   | ct    | act        |
|   | tumors |               |         |     |                                     |       |         |      |    |       |       |    |     |       |       |         |         |          |       |            |
|   |        |               |         |     |                                     |       |         |      |    |       |       |    |     |       |       |         |         |          |       |            |
|   | Liver  | Private in    |         |     |                                     | ENST0 | ENSP00  |      |    |       |       |    |     |       |       |         |         |          |       |            |
| 4 | metas  | metastatic    | 11:1192 | THY | Thy-1 cell surface antigen          | 00005 | 0004336 | 107  | E/ | Gag/  | -     | .  | 0.9 | NA    | 0.611 | m_imp   | 2.016   | high_imp | NA    | NA         |
|   | tases  | tumor         | 90839   | 1   |                                     |       |         |      | K  | Aag   |       | 0  | 98  |       |       |         | act     | ct       |       |            |
|   |        |               |         |     |                                     |       |         |      |    |       |       |    |     |       |       |         |         |          |       |            |
|   | Prima  | Private in    | 10:9814 | TLL | tolloid-like 2                      | ENST0 | ENSP00  |      | E/ | gAg/  | -     | 0  | 0.9 | 2.4   | 2.174 | high_im |         | high_imp | 1.288 | medium_imp |
| 4 | ry     | primary tumor | 4400    | 2   |                                     | 00003 | 0003506 | 713  | G  | gGg   |       |    | 99  |       |       |         | pact    | 1.85     | ct    | act        |
|   | tumor  |               |         |     |                                     |       |         |      |    |       |       |    |     |       |       |         |         |          |       |            |
|   |        |               |         |     |                                     |       |         |      |    |       |       |    |     |       |       |         |         |          |       |            |
|   | Liver  | Private in    |         |     |                                     | ENST0 | ENSP00  |      |    |       | rs289 |    |     |       |       |         |         |          |       |            |
| 4 | metas  | metastatic    | 17:7578 | TP5 | tumor protein p53                   | 00003 | 0003797 | 164  | R/ | cGc/  | 34578 | 0  | 1   | NA    | 2.265 | high_im |         | high_imp | NA    | NA         |
|   | tases  | tumor         | 406     | 3   |                                     |       |         |      | H  | cAc   |       |    |     |       |       |         | pact    | 2.147    | ct    |            |
|   |        |               |         |     |                                     |       |         |      |    |       |       |    |     |       |       |         |         |          |       |            |

|   |                  |                                         |              |              |                                                        |                |                |     |         |             |            |   |           |       |       |                 |        |                   |       |                   |
|---|------------------|-----------------------------------------|--------------|--------------|--------------------------------------------------------|----------------|----------------|-----|---------|-------------|------------|---|-----------|-------|-------|-----------------|--------|-------------------|-------|-------------------|
| 4 | Liver metastases | Private in metastatic tumor             | 11:118889604 | TRA<br>PPC 4 | trafficking protein particle complex 4                 | ENST0000033058 | ENSP0000432920 | 33  | S/<br>R | agT/<br>agA | -          | 0 | 0.8<br>38 | NA    | 2.062 | high_im<br>pact | 0.607  | medium_i<br>mpact | NA    | NA                |
| 4 | Primary tumor    | Common in primary and metastatic tumors | 1:154525245  | UBE<br>2Q1   | ubiquitin-conjugating enzyme E2Q family member 1       | ENST0000092211 | ENSP0000292211 | 261 | R/<br>W | Agg/<br>Tgg | -          | 0 | 1         | 2.675 | 2.114 | high_im<br>pact | 2.205  | highimpa<br>ct    | 1.553 | medium_imp<br>act |
| 4 | Liver metastases | Common in primary and metastatic tumors | 1:154525245  | UBE<br>2Q1   | ubiquitin-conjugating enzyme E2Q family member 1       | ENST0000092211 | ENSP0000292211 | 261 | R/<br>W | Agg/<br>Tgg | -          | 0 | 1         | 2.675 | 2.114 | high_im<br>pact | 2.205  | highimpa<br>ct    | 1.553 | medium_imp<br>act |
| 4 | Primary tumor    | Common in primary and metastatic tumors | 2:135744416  | YSK<br>4     | YSK4 Sps1/Ste20-related kinase homolog (S. cerevisiae) | ENST0000092915 | ENSP0000376647 | 693 | E/<br>Q | Gag/<br>Cag | rs1112542  | 0 | 0.8<br>12 | NA    | 2.032 | high_im<br>pact | 0.576  | medium_i<br>mpact | NA    | NA                |
| 4 | Liver metastases | Common in primary and metastatic tumors | 2:135744416  | YSK<br>4     | YSK4 Sps1/Ste20-related kinase homolog (S. cerevisiae) | ENST0000037365 | ENSP0000392827 | 66  | E/<br>Q | Gag/<br>Cag | rs1112542  | 0 | 0.7<br>88 | NA    | 2.032 | high_im<br>pact | 0.54   | medium_i<br>mpact | NA    | NA                |
| 4 | Liver metastases | Private in metastatic tumor             | 20:39832235  | ZHX<br>3     | zinc fingers and homeoboxes 3                          | ENST0000021422 | ENSP0000405421 | 150 | S/<br>F | tCc/t<br>Tc | -          | 0 | 0.1<br>65 | NA    | 2.051 | high_im<br>pact | -0.199 | lowimpa<br>ct     | NA    | NA                |
| 4 | Liver metastases | Private in metastatic tumor             | 19:21606429  | ZNF<br>493   | zinc finger protein 493                                | ENST0000055504 | ENSP0000347691 | 195 | C/<br>F | tGt/t<br>Tt | rs4621113  | 0 | 0.9<br>85 | 3.495 | 2.084 | high_im<br>pact | 1.307  | medium_i<br>mpact | 2.255 | medium_imp<br>act |
| 4 | Primary tumor    | Common in primary and metastatic tumors | 19:52919972  | ZNF<br>528   | zinc finger protein 528                                | ENST0000060465 | ENSP0000353652 | 623 | H/<br>Y | Cat/T<br>at | rs77428121 | 0 | 0.9<br>47 | 3.715 | 2.084 | high_im<br>pact | 0.98   | medium_i<br>mpact | 2.459 | medium_imp<br>act |
| 4 | Liver            | Common in                               | 19:5291      | ZNF          | zinc finger protein 528                                | ENST0          | ENSP00         | 623 | H/      | Cat/T       | rs774      | 0 | 0.9       | 3.715 | 2.084 | high_im         | 0.98   | medium_i          | 2.459 | medium_imp        |

|   |       |               |         |     |                                            |       |         |      |     |        |       |    |     |       |       |         |        |             |        |               |
|---|-------|---------------|---------|-----|--------------------------------------------|-------|---------|------|-----|--------|-------|----|-----|-------|-------|---------|--------|-------------|--------|---------------|
|   | metas | primary and   | 9972    | 528 |                                            | 00003 | 0003536 |      | Y   | at     | 28121 | 47 |     |       | pact  |         | mpact  |             | act    |               |
|   | tases | metastatic    |         |     |                                            | 60465 | 52      |      |     |        |       |    |     |       |       |         |        |             |        |               |
|   |       | tumors        |         |     |                                            |       |         |      |     |        |       |    |     |       |       |         |        |             |        |               |
|   | Liver | Private in    |         |     |                                            | ENST0 | ENSP00  |      |     |        |       |    |     |       |       |         |        |             |        |               |
| 5 | metas | metastatic    | 7:15055 | ABP | amiloride binding protein 1 (amine oxidase | 00004 | 0004116 | 118  | P/  | Ccc/   | -     | 0  | 0.9 | NA    | 2.219 | high_im | 0.837  | medium_i    | NA     | NA            |
|   | tases | tumor         | 3910    | 1   | (copper-containing))                       | 16793 | 13      |      | A   | Gcc    | -     | 0  | 3   |       |       | pact    |        | mpact       |        |               |
|   | Liver | Private in    |         |     |                                            | ENST0 | ENSP00  |      |     |        |       |    |     |       |       |         |        |             |        |               |
| 5 | metas | metastatic    | 7:44146 | AEB | AE binding protein 1                       | 00002 | 0002233 | 111  | E/  | gaG/   | -     | 0  | 0   | 0.895 | 2.042 | high_im | -1.287 | low_impact  | -0.263 | low_impact    |
|   | tases | tumor         | 224     | P1  |                                            | 23357 | 57      |      | D   | gaC    | -     | 0  | 0   |       |       | pact    |        | ct          |        |               |
|   | Liver | Private in    |         |     |                                            | ENST0 | ENSP00  |      |     |        |       |    |     |       |       |         |        |             |        |               |
| 5 | metas | metastatic    | 11:9460 | AM  | angiototin like 1                          | 00003 | 0003234 | 542  | L/I | Ctc/A  | -     | 0  | 0   | NA    | 2.02  | high_im | -1.457 | low_impact  | NA     | NA            |
|   | tases | tumor         | 3952    | 1   |                                            | 17837 | 74      |      |     | tc     | -     | 0  | 0   |       |       | pact    |        | ct          |        |               |
|   | Liver | Private in    |         |     |                                            | ENST0 | ENSP00  |      |     |        |       |    |     |       |       |         |        |             |        |               |
| 5 | metas | metastatic    | 2:97505 | AN  | ankyrin repeat domain 23                   | 00004 | 0003989 | 303  | T/  | Acc/   | rs748 | 0  | 0.6 | 0.695 | 2.062 | high_im | 0.41   | medium_i    | -0.338 | low_impact    |
|   | tases | tumor         | 297     | 3   |                                            | 18232 | 87      |      | P   | Ccc    | 26568 | 0  | 98  |       |       | pact    |        | mpact       |        |               |
|   | Liver | Private in    |         |     |                                            | ENST0 | ENSP00  |      |     |        |       |    |     |       |       |         |        |             |        |               |
| 5 | metas | metastatic    | 12:5853 | AN  | anoctamin 2                                | 00005 | 0004377 | 411  | C/  | tGt/t  | -     | 0  | 0.9 | NA    | 2.124 | high_im | 1.808  | high_impact | NA     | NA            |
|   | tases | tumor         | 445     | O2  |                                            | 41277 | 54      |      | S   | Ct     | -     | 0  | 99  |       |       | pact    |        | ct          |        |               |
|   | Prima | Private in    |         |     |                                            | ENST0 | ENSP00  |      |     |        |       |    |     |       |       |         |        |             |        |               |
| 5 | ry    | primary tumor | 11:4303 | AN  | anoctamin 9                                | 00003 | 0003327 | 183  | F/  | Ttt/Ct | -     | 0  | 0.4 | 2.67  | 2.056 | high_im | 0.249  | medium_i    | 1.553  | medium_impact |
|   | tumor |               | 96      | O9  |                                            | 32826 | 88      |      | L   | t      | -     | 0  | 96  |       |       | pact    |        | mpact       |        | act           |
|   | Prima | Private in    |         |     |                                            | ENST0 | ENSP00  |      |     |        |       |    |     |       |       |         |        |             |        |               |
| 5 | ry    | primary tumor | 22:2972 | AP1 | adaptor-related protein complex 1, beta 1  | 00004 | 0003841 | 775  | P/  | cCc/   | -     | 0  | 1   | 3.405 | 2.035 | high_im | 1.851  | high_impact | 1.873  | medium_impact |
|   | tumor |               | 7891    | B1  | subunit                                    | 05198 | 94      |      | R   | cGc    | -     | 0  | 1   |       |       | pact    |        | ct          |        | act           |
|   | Liver | Private in    |         |     |                                            | ENST0 | ENSP00  |      |     |        |       |    |     |       |       |         |        |             |        |               |
| 5 | metas | metastatic    | X:17553 | AS  | acetylserotonin O-methyltransferase        | 00004 | 0003920 | 36   | W/  | tgG/t  | -     | 0  | 0.9 | NA    | 2.52  | high_im | 2.564  | high_impact | NA     | NA            |
|   | tases | tumor         | 98      | MT  |                                            | 32523 | 53      |      | C   | gT     | -     | 0  | 98  |       |       | pact    |        | ct          |        |               |
|   | Liver | Private in    |         |     |                                            | ENST0 | ENSP00  |      |     |        |       |    |     |       |       |         |        |             |        |               |
| 5 | metas | metastatic    | 4:47574 | ATP | ATPase, class V, type 10D                  | 00002 | 0002738 | 1067 | A/  | gCa/   | -     | 0  | 0.9 | 4.76  | 2.189 | high_im | 0.963  | medium_i    | 3.289  | high_impact   |
|   | tases | tumor         | 207     | 10D |                                            | 73859 | 59      |      | E   | gAa    | -     | 0  | 67  |       |       | pact    |        | mpact       |        |               |



|   |                     |                                                  |                 |                 |                                                   |                         |                         |      |         |             |                |         |           |                |                   |        |               |       |               |
|---|---------------------|--------------------------------------------------|-----------------|-----------------|---------------------------------------------------|-------------------------|-------------------------|------|---------|-------------|----------------|---------|-----------|----------------|-------------------|--------|---------------|-------|---------------|
| 5 | Liver<br>metastases | Private in<br>metastatic<br>tumor                | 5:79031<br>558  | CM<br>YA5       | cardiomyopathy associated 5                       | ENST0<br>00004<br>46378 | ENSP00<br>0003947<br>70 | 2324 | G/<br>S | Ggt/<br>Agt | rs626<br>21912 | 0<br>95 | 0.9<br>95 | 2.175<br>2.02  | high_im<br>pact   | 1.555  | high_impact   | 1.124 | medium_impact |
| 5 | Liver<br>metastases | Private in<br>metastatic<br>tumor                | 17:4827<br>5136 | COL<br>1A1      | collagen, type I, alpha 1                         | ENST0<br>00002<br>25964 | ENSP00<br>0002259<br>64 | 218  | G/<br>A | gGt/g<br>Ct | -              | 0<br>0  | 0<br>0    | 4.085<br>2.263 | high_im<br>pact   | -2.068 | low_impact    | 2.504 | medium_impact |
| 5 | Primary<br>tumor    | Private in<br>primary tumor                      | 2:18991<br>6099 | COL<br>5A2      | collagen, type V, alpha 2                         | ENST0<br>00004<br>52536 | ENSP00<br>0003986<br>03 | 600  | G/<br>R | Ggc/<br>Cgc | -              | N<br>A  | 0.9<br>98 | NA<br>NA       | NA<br>NA          | 1.611  | high_impact   | NA    | NA            |
| 5 | Primary<br>tumor    | Common in<br>primary and<br>metastatic<br>tumors | 1:22552<br>5089 | DN<br>AH1<br>4  | dynein, axonemal, heavy chain 14                  | ENST0<br>00004<br>30092 | ENSP00<br>0004144<br>02 | 3308 | W/<br>L | tGg/t<br>Tg | -              | 0<br>0  | 0.9<br>78 | NA<br>2.056    | high_im<br>pact   | 1.062  | medium_impact | NA    | NA            |
| 5 | Liver<br>metastases | Common in<br>primary and<br>metastatic<br>tumors | 1:22552<br>5089 | DN<br>AH1<br>4  | dynein, axonemal, heavy chain 14                  | ENST0<br>00004<br>39375 | ENSP00<br>0003920<br>61 | 3308 | W/<br>L | tGg/t<br>Tg | -              | 0<br>0  | 0.9<br>78 | NA<br>2.056    | high_im<br>pact   | 1.062  | medium_impact | NA    | NA            |
| 5 | Primary<br>tumor    | Private in<br>primary tumor                      | 1:38184<br>055  | EPH<br>A10      | EPH receptor A10                                  | ENST0<br>00003<br>30210 | ENSP00<br>0003303<br>79 | 501  | V/<br>M | Gtg/<br>Atg | rs787<br>57428 | 0<br>4  | 0.9<br>4  | NA<br>2.386    | high_im<br>pact   | 0.705  | medium_impact | NA    | NA            |
| 5 | Liver<br>metastases | Private in<br>metastatic<br>tumor                | 15:4147<br>6236 | EXD<br>1        | exonuclease 3'-5' domain containing 1             | ENST0<br>00003<br>14992 | ENSP00<br>0003210<br>29 | 480  | S/<br>C | Agt/T<br>gt | -              | 0<br>0  | 0.8<br>44 | 2.015<br>2.092 | high_im<br>pact   | 0.781  | medium_impact | 1.037 | medium_impact |
| 5 | Liver<br>metastases | Private in<br>metastatic<br>tumor                | 1:18486<br>8431 | FA<br>M12<br>9A | family with sequence similarity 129, member A     | ENST0<br>00003<br>67511 | ENSP00<br>0003564<br>81 | 23   | A/<br>T | Gct/<br>Act | -              | 0<br>2  | 0.9<br>98 | 2.045<br>1     | low_im<br>pact    | 1.738  | high_impact   | 1.097 | medium_impact |
| 5 | Liver<br>metastases | Private in<br>metastatic<br>tumor                | 4:47408<br>705  | GA<br>BRB<br>1  | gamma-aminobutyric acid (GABA) A receptor, beta 1 | ENST0<br>00002<br>95454 | ENSP00<br>0002954<br>54 | 281  | T/<br>M | aCg/<br>aTg | -              | 0<br>0  | 0.9<br>99 | 2.51<br>0.72   | mediu<br>m_impact | 1.696  | high_impact   | 1.24  | medium_impact |
|   |                     |                                                  |                 |                 |                                                   |                         |                         |      |         |             |                | 3       |           |                |                   |        |               |       |               |

|   |                         |                                   |                 |                 |                                                                            |                         |                         |      |         |             |               |         |           |                 |                       |        |                   |        |            |
|---|-------------------------|-----------------------------------|-----------------|-----------------|----------------------------------------------------------------------------|-------------------------|-------------------------|------|---------|-------------|---------------|---------|-----------|-----------------|-----------------------|--------|-------------------|--------|------------|
| 5 | Prima<br>ry<br>tumor    | Private in<br>primary tumor       | 19:4820<br>5418 | GLT<br>SC<br>R1 | glioma tumor suppressor candidate region<br>gene 1                         | ENST0<br>00003<br>96720 | ENSP00<br>0003799<br>46 | 1477 | S/<br>A | Tcc/<br>Gcc | -<br>-        | 0<br>0  | 0.9<br>01 | 0.975<br>2.062  | high_im<br>pact       | 0.745  | medium_i<br>mpact | -0.044 | low_impact |
| 5 | Liver<br>metas<br>tases | Private in<br>metastatic<br>tumor | 8:37690<br>604  | GP<br>R12<br>4  | G protein-coupled receptor 124                                             | ENST0<br>00004<br>16514 | ENSP00<br>0004051<br>45 | 385  | G/<br>R | Ggg/<br>Cgg | -<br>-        | 0<br>9  | 0.9<br>9  | NA<br>2.048     | high_im<br>pact       | 1.383  | medium_i<br>mpact | NA     | NA         |
| 5 | Liver<br>metas<br>tases | Private in<br>metastatic<br>tumor | 1:22625<br>3443 | H3F<br>3A       | H3 histone, family 3A                                                      | ENST0<br>00003<br>66814 | ENSP00<br>0003557<br>79 | 72   | V/<br>A | gTg/<br>gCg | -<br>-        | 0<br>66 | 0.2<br>66 | NA<br>2.064     | high_im<br>pact       | 0      | medium_i<br>mpact | NA     | NA         |
| 5 | Prima<br>ry<br>tumor    | Private in<br>primary tumor       | 15:7361<br>4899 | HC<br>N4        | hyperpolarization activated cyclic<br>nucleotide-gated potassium channel 4 | ENST0<br>00002<br>61917 | ENSP00<br>0002619<br>17 | 1179 | P/<br>S | Cct/T<br>ct | -<br>-        | 0<br>39 | 0.2<br>39 | 1.04<br>2.072   | high_im<br>pact       | -0.076 | low_imp<br>ct     | 0.03   | low_impact |
| 5 | Liver<br>metas<br>tases | Private in<br>metastatic<br>tumor | 19:4088<br>6465 | HIP<br>K4       | homeodomain interacting protein kinase 4                                   | ENST0<br>00004<br>52139 | ENSP00<br>0003977<br>36 | 443  | Y/<br>S | tAc/t<br>Cc | -<br>-        | 0<br>55 | 0.9<br>55 | NA<br>2.032     | high_im<br>pact       | 0.962  | medium_i<br>mpact | NA     | NA         |
| 5 | Liver<br>metas<br>tases | Private in<br>metastatic<br>tumor | 6:34211<br>288  | HM<br>GA1       | high mobility group AT-hook 1                                              | ENST0<br>00003<br>47617 | ENSP00<br>0002882<br>45 | 77   | K/<br>R | aAa/<br>aGa | -<br>-        | 0<br>0  | 0<br>0    | NA<br>2.039     | high_im<br>pact       | -1.648 | low_imp<br>ct     | NA     | NA         |
| 5 | Liver<br>metas<br>tases | Private in<br>metastatic<br>tumor | 16:7112<br>7814 | HY<br>DIN       | hydrocephalus inducing homolog (mouse)                                     | ENST0<br>00004<br>48089 | ENSP00<br>0003985<br>44 | 451  | R/<br>P | cGa/<br>cCa | rs720<br>0485 | .<br>2  | 0.9<br>98 | NA<br>9         | low_im<br>pact        | 1.613  | high_imp<br>ct    | NA     | NA         |
| 5 | Liver<br>metas<br>tases | Private in<br>metastatic<br>tumor | 7:50367<br>288  | IKZ<br>F1       | IKAROS family zinc finger 1 (Ikaros)                                       | ENST0<br>00003<br>31340 | ENSP00<br>0003316<br>14 | 32   | P/<br>L | cCg/<br>cTg | -<br>-        | .<br>0  | 0.9<br>98 | [sent]<br>0.545 | mediu<br>m_imp<br>act | 1.791  | high_imp<br>ct    | NA     | NA         |
| 5 | Liver<br>metas<br>tases | Private in<br>metastatic<br>tumor | 3:12957<br>102  | IQS<br>EC1      | IQ motif and Sec7 domain 1                                                 | ENST0<br>00004<br>50726 | ENSP00<br>0003978<br>11 | 733  | K/<br>E | Aaa/<br>Gaa | -<br>-        | .<br>0  | 0.9<br>93 | NA<br>0.639     | mediu<br>m_imp<br>act | 1.544  | high_imp<br>ct    | NA     | NA         |

|   |       |               |         |     |                                                |       |         |      |    |       |       |       |       |       |          |       |               |       |               |
|---|-------|---------------|---------|-----|------------------------------------------------|-------|---------|------|----|-------|-------|-------|-------|-------|----------|-------|---------------|-------|---------------|
|   | Liver | Private in    |         |     |                                                | ENST0 | ENSP00  |      |    |       |       | 0     |       |       |          |       |               |       |               |
| 5 | metas | metastatic    | X:15328 | IRA | interleukin-1 receptor-associated kinase 1     | 00004 | 0004037 | 110  | G/ | Gga/  | -     | . 0.9 | NA    | -0.45 | low_im   |       |               |       |               |
|   | tases | tumor         | 2413    | K1  |                                                | 43220 | 30      |      | R  | Cga   | -     | 3 99  |       | 9     | pact     | 1.87  | high_impact   | NA    | NA            |
|   |       |               |         |     |                                                |       |         |      |    |       |       | 6     |       |       |          |       |               |       |               |
|   | Liver | Private in    |         | KAZ |                                                | ENST0 | ENSP00  |      |    |       |       |       |       |       |          |       |               |       |               |
| 5 | metas | metastatic    | 10:1028 | ALD | Kazal-type serine peptidase inhibitor domain 1 | 00003 | 0003592 | 76   | C/ | Tgc/  | rs115 | 0 0.9 | NA    | 2.277 | high_im  |       |               |       |               |
|   | tases | tumor         | 22575   | 1   |                                                | 70199 | 18      |      | G  | Ggc   | 47671 | 0 99  |       |       | pact     | 1.841 | high_impact   | NA    | NA            |
|   | Prima | Private in    | 17:3895 | KRT | keratin 28                                     | ENST0 | ENSP00  |      |    |       |       |       |       |       |          |       |               |       |               |
| 5 | ry    | primary tumor | 3472    | 28  |                                                | 00003 | 0003052 | 251  | P/ | cCg/  | -     | 0 1   | 2.945 | 2.018 | high_im  |       |               |       |               |
|   | tumor |               |         |     |                                                | 06658 | 63      |      | R  | cGg   | -     | 0 1   |       |       | pact     | 1.682 | high_impact   | 1.625 | medium_impact |
|   |       |               |         |     |                                                |       |         |      |    |       |       |       |       |       |          |       |               |       |               |
|   | Liver | Private in    |         |     |                                                | ENST0 | ENSP00  |      |    |       |       |       |       |       |          |       |               |       |               |
| 5 | metas | metastatic    | 6:30673 | MD  | mediator of DNA-damage checkpoint 1            | 00003 | 0003655 | 1286 | P/ | cCc/  | -     | . 0.9 |       |       | mediu    |       |               |       |               |
|   | tases | tumor         | 103     | C1  |                                                | 76406 | 88      |      | R  | cGc   | -     | 0 88  | 2.135 | 0.916 | m_impact | 1.292 | medium_impact | 3.569 | high_impact   |
|   |       |               |         |     |                                                |       |         |      |    |       |       |       |       |       |          |       |               |       |               |
|   | Prima | Common in     |         | MT  |                                                | ENST0 | ENSP00  |      |    |       |       |       |       |       |          |       |               |       |               |
| 5 | ry    | primary and   | 4:18745 | NR1 | melatonin receptor 1A                          | 00003 | 0003028 | 125  | R/ | cGc/  | -     | 0 1   | 4.55  | 1.948 | m_impact | 1.856 | high_impact   | 2.856 | medium_impact |
|   | tumor | metastatic    | 5522    | A   |                                                | 07161 | 11      |      | H  | cAc   | -     | 0 1   |       |       | act      |       |               |       |               |
|   |       | tumors        |         |     |                                                |       |         |      |    |       |       |       |       |       |          |       |               |       |               |
|   | Liver | Common in     |         | MT  |                                                | ENST0 | ENSP00  |      |    |       |       |       |       |       |          |       |               |       |               |
| 5 | metas | primary and   | 4:18745 | NR1 | melatonin receptor 1A                          | 00003 | 0003028 | 125  | R/ | cGc/  | -     | 0 1   | 4.55  | 1.948 | m_impact | 1.856 | high_impact   | 2.856 | medium_impact |
|   | tases | metastatic    | 5522    | A   |                                                | 07161 | 11      |      | H  | cAc   | -     | 0 1   |       |       | act      |       |               |       |               |
|   |       | tumors        |         |     |                                                |       |         |      |    |       |       |       |       |       |          |       |               |       |               |
|   | Prima | Common in     |         | MY  |                                                | ENST0 | ENSP00  |      |    |       |       |       |       |       |          |       |               |       |               |
| 5 | ry    | primary and   | 17:4859 | CBP | MYCBP associated protein                       | 00003 | 0003231 | 151  | P/ | cCt/c | -     | . 0.9 | NA    | 0.856 | mediu    |       |               |       |               |
|   | tumor | metastatic    | 4772    | AP  |                                                | 23776 | 84      |      | L  | Tt    | -     | 0 99  |       |       | m_impact | 1.894 | high_impact   | NA    | NA            |
|   |       | tumors        |         |     |                                                |       |         |      |    |       |       |       |       |       |          |       |               |       |               |
|   | Liver | Common in     |         | MY  |                                                | ENST0 | ENSP00  |      |    |       |       |       |       |       |          |       |               |       |               |
| 5 | metas | primary and   | 17:4859 | CBP | MYCBP associated protein                       | 00004 | 0003972 | 114  | P/ | cCt/c | -     | . 0.9 |       |       | mediu    |       |               |       |               |
|   | tases | metastatic    | 4772    | AP  |                                                | 36259 | 09      |      | L  | Tt    | -     | 0 95  | 2.515 | 0.856 | m_impact | 1.5   | high_impact   | 1.571 | medium_impact |
|   |       | tumors        |         |     |                                                |       |         |      |    |       |       |       |       |       |          |       |               |       |               |
|   |       |               |         |     |                                                |       |         |      |    |       |       |       |       |       |          |       |               |       |               |

|   |                  |                                         |                  |            |                                                      |                |                 |      |     |         |            |   |       |       |       |               |        |               |        |               |
|---|------------------|-----------------------------------------|------------------|------------|------------------------------------------------------|----------------|-----------------|------|-----|---------|------------|---|-------|-------|-------|---------------|--------|---------------|--------|---------------|
| 5 | Primary tumor    | Common in primary and metastatic tumors | 1:10072<br>22    | NA         | NA                                                   | ENST0000453464 | ENSP0000410533  | 242  | P/H | cCc/cAc | rs71628928 | 0 | 0     | NA    | 2.069 | high_impact   | -1.491 | low_impact    | NA     | NA            |
| 5 | Liver metastases | Common in primary and metastatic tumors | 1:10072<br>22    | NA         | NA                                                   | ENST0000453464 | ENSP0000410533  | 242  | P/H | cCc/cAc | rs71628928 | 0 | 0     | NA    | 2.069 | high_impact   | -1.491 | low_impact    | NA     | NA            |
| 5 | Liver metastases | Private in metastatic tumor             | 20:6219<br>3062  | NA         | NA                                                   | ENST0000427522 | ENSP00000393257 | 1674 | R/H | cGt/cAt | -          | 0 | 0.998 | NA    | 1.92  | medium_impact | 1.597  | high_impact   | NA     | NA            |
| 5 | Primary tumor    | Private in primary tumor                | 17:1551<br>7237  | NA         | NA                                                   | ENST0000455584 | ENSP00000402644 | 586  | L/V | Ctg/Gtg | rs62070406 | 0 | 0     | NA    | 2.064 | high_impact   | -1.516 | low_impact    | NA     | NA            |
| 5 | Liver metastases | Private in metastatic tumor             | 11:1131<br>46050 | NC<br>AM1  | neural cell adhesion molecule 1                      | ENST0000433634 | ENSP00000390982 | 295  | E/K | Gaa/Aaa | -          | 0 | 0.967 | NA    | 2.062 | high_impact   | 1.031  | medium_impact | NA     | NA            |
| 5 | Liver metastases | Private in metastatic tumor             | 11:5758<br>062   | OR5<br>6B1 | olfactory receptor, family 56, subfamily B, member 1 | ENST0000317121 | ENSP00000322939 | 106  | C/R | Tgc/Cgc | rs7397032  | 0 | 1     | 4     | 1.67  | medium_impact | 1.724  | high_impact   | 1.629  | medium_impact |
| 5 | Primary tumor    | Common in primary and metastatic tumors | 10:1027<br>77868 | PDZ<br>D7  | PDZ domain containing 7                              | ENST0000370215 | ENSP00000359234 | 504  | D/N | Gac/Aac | -          | 0 | 0.238 | 0.975 | 2.062 | high_impact   | -0.079 | low_impact    | -0.044 | low_impact    |
| 5 | Liver metastases | Common in primary and metastatic tumors | 10:1027<br>77868 | PDZ<br>D7  | PDZ domain containing 7                              | ENST0000370215 | ENSP00000359234 | 504  | D/N | Gac/Aac | -          | 0 | 0.238 | 0.975 | 2.062 | high_impact   | -0.079 | low_impact    | -0.044 | low_impact    |
| 5 | Liver metastases | Private in metastatic tumor             | 16:2159<br>349   | PKD<br>1   | polycystic kidney disease 1 (autosomal dominant)     | ENST0000300003 | ENSP000003719   | 219  | F/S | tTc/tCc | -          | 0 | 0.996 | NA    | 0.245 | medium_impact | 1.531  | high_impact   | NA     | NA            |



|   |        |               |         |     |                                                |       |         |     |     |       |   |     |       |       |         |       |             |        |               |
|---|--------|---------------|---------|-----|------------------------------------------------|-------|---------|-----|-----|-------|---|-----|-------|-------|---------|-------|-------------|--------|---------------|
|   | tases  | tumor         |         |     |                                                | 82481 | 21      |     |     |       | 0 |     |       |       |         | act   |             |        |               |
|   |        |               |         |     |                                                |       |         |     |     |       | 8 |     |       |       |         |       |             |        |               |
|   |        |               |         |     |                                                |       |         |     |     |       | 0 |     |       |       |         |       |             |        |               |
| 5 | Liver  | Private in    | 19:4513 | PLI |                                                | ENST0 | ENSP00  |     |     |       |   |     |       |       |         |       |             |        |               |
|   | metas  | metastatic    | 269     | N4  | perilipin 4                                    | 00003 | 0003012 | 221 | K/  | Aaa/  | . | 0.9 | 2.48  | -0.53 | low_im  | 1.512 | high_impact | 1.727  | medium_impact |
|   | tases  | tumor         |         |     |                                                | 01286 | 86      |     | E   | Gaa   | - | 3   | 97    | 4     | pact    |       |             |        | act           |
|   |        |               |         |     |                                                |       |         |     |     |       | 3 |     |       |       |         |       |             |        |               |
| 5 | Prima  | Common in     | 2:44571 | PRE |                                                | ENST0 | ENSP00  |     |     |       |   |     |       |       |         |       |             |        |               |
|   | ry     | primary and   | 067     | PL  | prolyl endopeptidase-like                      | 00004 | 0003950 | 145 | L/I | Tta/A | . | 0.7 | NA    | 2.111 | high_im | 0.4   | medium_i    | NA     | NA            |
|   | tumor  | metastatic    |         |     |                                                | 38314 | 34      |     |     | ta    | - | 0   | 43    |       | pact    |       | mpact       |        |               |
|   | tumors | tumors        |         |     |                                                |       |         |     |     |       |   |     |       |       |         |       |             |        |               |
| 5 | Liver  | Common in     | 2:44571 | PRE |                                                | ENST0 | ENSP00  |     |     |       |   |     |       |       |         |       |             |        |               |
|   | metas  | primary and   | 067     | PL  | prolyl endopeptidase-like                      | 00004 | 0003950 | 145 | L/I | Tta/A | . | 0.7 | NA    | 2.111 | high_im | 0.4   | medium_i    | NA     | NA            |
|   | tases  | metastatic    |         |     |                                                | 38314 | 34      |     |     | ta    | - | 0   | 43    |       | pact    |       | mpact       |        |               |
|   | tumors | tumors        |         |     |                                                |       |         |     |     |       |   |     |       |       |         |       |             |        |               |
| 5 | Liver  | Private in    | 12:7098 | PTP |                                                | ENST0 | ENSP00  |     |     |       |   |     |       |       |         |       |             |        |               |
|   | metas  | metastatic    | 8289    | RB  | protein tyrosine phosphatase, receptor type, B | 00004 | 0003930 | 274 | A/  | Gct/  | . | 0.9 | 2.135 | 0.598 | mediu   | 1.799 | high_impact | 1.065  | medium_impact |
|   | tases  | tumor         |         |     |                                                | 51516 | 28      |     | T   | Act   | - | 0   | 98    |       | act     |       |             |        | act           |
|   |        |               |         |     |                                                |       |         |     |     |       | 4 |     |       |       |         |       |             |        |               |
| 5 | Prima  | Private in    | X:11442 | RB  |                                                | ENST0 | ENSP00  |     |     |       |   |     |       |       |         |       |             |        |               |
|   | ry     | primary tumor | 6361    | MXL | RNA binding motif protein, X-linked-like 3     | 00004 | 0004174 | 786 | S/  | tCg/t | . | 0.4 | 0     | 2.056 | high_im | 0.114 | medium_i    | -1.129 | low_impact    |
|   | tumor  | tumor         |         | 3   |                                                | 24776 | 51      |     | L   | Tg    | - | 0   | 03    |       | pact    |       | mpact       |        |               |
| 5 | Prima  | Private in    | 7:15006 | REP |                                                | ENST0 | ENSP00  |     |     |       |   |     |       |       |         |       |             |        |               |
|   | ry     | primary tumor | 9226    | IN1 | replication initiator 1                        | 00004 | 0004198 | 359 | R/  | cGc/  | . | 0.9 | NA    | 2.056 | high_im | 1.584 | high_impact | NA     | NA            |
|   | tumor  | tumor         |         |     |                                                | 88943 | 72      |     | H   | cAc   | - | 0   | 96    |       | pact    |       | ct          |        |               |
| 5 | Prima  | Common in     | 16:1116 | RH  |                                                | ENST0 | ENSP00  |     |     |       |   |     |       |       |         |       |             |        |               |
|   | ry     | primary and   | 21      | BDF | rhomboid 5 homolog 1 (Drosophila)              | 00004 | 0003921 | 428 | A/  | Gcg/  | . | 0.9 | NA    | 1.156 | mediu   | 1.686 | high_impact | NA     | NA            |
|   | tumor  | metastatic    |         | 1   |                                                | 54039 | 33      |     | T   | Acg   | - | 0   | 98    |       | act     |       | ct          |        |               |
|   | tumors | tumors        |         |     |                                                |       |         |     |     |       | 1 |     |       |       |         |       |             |        |               |
| 5 | Liver  | Common in     | 16:1116 | RH  |                                                | ENST0 | ENSP00  |     |     |       |   |     |       |       |         |       |             |        |               |
|   | metas  | primary and   | 21      | BDF | rhomboid 5 homolog 1 (Drosophila)              | 00004 | 0003921 | 428 | A/  | Gcg/  | . | 0.9 | NA    | 1.156 | mediu   | 1.686 | high_impact | NA     | NA            |
|   | tases  | tumor         |         |     |                                                |       |         |     | T   | Acg   | - | 0   | 98    |       | m_imp   |       | ct          |        |               |

|   |       |               |         |     |                                                   |        |         |     |       |       |       |     |       |       |         |         |          |            |    |
|---|-------|---------------|---------|-----|---------------------------------------------------|--------|---------|-----|-------|-------|-------|-----|-------|-------|---------|---------|----------|------------|----|
|   | tases | metastatic    | 1       |     | 54039                                             | 33     |         |     |       |       | 0     |     |       |       | act     |         |          |            |    |
|   |       | tumors        |         |     |                                                   |        |         |     |       |       | 1     |     |       |       |         |         |          |            |    |
|   | Prima | Common in     |         |     | ENST0                                             | ENSP00 |         |     |       |       |       |     |       |       |         |         |          |            |    |
| 5 | ry    | primary and   | 1:15634 | RH  |                                                   |        |         | V/  | gTc/  | rs115 | 0     | 0.3 |       |       | high_im |         | medium_i |            |    |
|   | tumor | metastatic    | 7834    | BG  | Rh family, B glycoprotein (gene/pseudogene)       | 00003  | 0003572 | 143 | D     | gAc   | 86833 | 0   | 91    | NA    | 2.268   | pact    | 0.029    | mpact      | NA |
|   |       | tumors        |         |     | 68246                                             | 29     |         |     |       |       |       |     |       |       |         |         |          |            |    |
|   | Liver | Common in     |         |     | ENST0                                             | ENSP00 |         |     |       |       |       |     |       |       |         |         |          |            |    |
| 5 | metas | primary and   | 1:15634 | RH  |                                                   |        |         | V/  | gTc/  | rs115 | 0     | 0.3 |       |       | high_im |         | medium_i |            |    |
|   | tases | metastatic    | 7834    | BG  | Rh family, B glycoprotein (gene/pseudogene)       | 00003  | 0003572 | 143 | D     | gAc   | 86833 | 0   | 91    | NA    | 2.268   | pact    | 0.029    | mpact      | NA |
|   |       | tumors        |         |     | 68246                                             | 29     |         |     |       |       |       |     |       |       |         |         |          |            |    |
|   | Prima | Common in     |         |     | ENST0                                             | ENSP00 |         |     |       |       |       |     |       |       |         |         |          |            |    |
| 5 | ry    | primary and   | 17:7831 | RNF |                                                   |        |         | R/  | Cgg/  |       | 0     | 1   | NA    | 2.011 | high_im |         | high_imp |            |    |
|   | tumor | metastatic    | 9717    | 213 | ring finger protein 213                           | 00003  | 0003382 | 601 | W     | Tgg   | -     |     |       |       | pact    | 1.832   | ct       | NA         |    |
|   |       | tumors        |         |     | 36301                                             | 18     |         |     |       |       |       |     |       |       |         |         |          |            |    |
|   | Liver | Common in     |         |     | ENST0                                             | ENSP00 |         |     |       |       |       |     |       |       |         |         |          |            |    |
| 5 | metas | primary and   | 17:7831 | RNF |                                                   |        |         | R/  | Cgg/  |       | 0     | 1   | NA    | 2.011 | high_im |         | high_imp |            |    |
|   | tases | metastatic    | 9717    | 213 | ring finger protein 213                           | 00003  | 0003382 | 601 | W     | Tgg   | -     |     |       |       | pact    | 1.832   | ct       | NA         |    |
|   |       | tumors        |         |     | 36301                                             | 18     |         |     |       |       |       |     |       |       |         |         |          |            |    |
|   | Liver | Private in    | 14:9144 | RPS |                                                   |        |         | P/  | Cca/  |       | 0     | 1   | NA    | 2.204 | high_im |         | high_imp |            |    |
| 5 | metas | metastatic    | 4710    | 6KA | ribosomal protein S6 kinase, 90kDa, polypeptide 5 | 00005  | 0004428 | 33  | S     | Tca   | -     |     |       |       | pact    | 1.921   | ct       | NA         |    |
|   | tases | tumor         |         | 5   |                                                   | 36315  | 03      |     |       |       |       |     |       |       |         |         |          |            |    |
|   | Prima | Private in    | 7:92764 | SA  |                                                   |        |         |     |       |       |       |     |       |       |         |         |          |            |    |
| 5 | ry    | primary tumor | 032     | MD  | sterile alpha motif domain containing 9-like      | 00004  | 0004057 | 418 | I/T   | aTt/a | -     | 0   | 0.6   | 2.045 | 2.062   | high_im |          | medium_i   |    |
|   | tumor |               |         | 9L  |                                                   | 11955  | 60      |     |       | Ct    |       | 6   |       |       | pact    | 0.367   | mpact    | 1.078      |    |
|   |       |               |         |     |                                                   |        |         |     |       |       |       |     |       |       |         |         |          | medium_imp |    |
|   | Liver | Private in    | 1:67895 | SER |                                                   |        |         | F/  | tTc/t |       | 0     | 0.9 |       |       |         |         |          |            |    |
| 5 | metas | metastatic    | 901     | BP1 | SERPINE1 mRNA binding protein 1                   | 00003  | 0003600 | 28  | S     | Cc    | -     | 0   | 0.9   | NA    | 2.339   | high_im |          | medium_i   |    |
|   | tases | tumor         |         |     |                                                   | 70990  | 29      |     |       |       |       | 04  |       |       | pact    | 1.02    | mpact    | NA         |    |
|   |       |               |         |     |                                                   |        |         |     |       |       |       |     |       |       |         |         |          | NA         |    |
|   | Liver | Private in    | 6:10089 | SIM |                                                   |        |         | R/  | Cgc/  |       | 0     | 1   | 3.775 | 2.056 | high_im |         | high_imp |            |    |
| 5 | metas | metastatic    | 6395    | 1   | single-minded homolog 1 (Drosophila)              | 00002  | 0002629 | 235 | C     | Tgc   | -     | 0   | 1     |       | pact    | 1.933   | ct       | 2.675      |    |
|   | tases | tumor         |         |     |                                                   | 62901  | 01      |     |       |       |       |     |       |       |         |         |          | medium_imp |    |
|   |       |               |         |     |                                                   |        |         |     |       |       |       |     |       |       |         |         |          | act        |    |

|   |                         |                                                  |                 |                 |                                                             |                         |                         |     |         |             |        |        |           |       |       |                       |       |                   |       |                   |
|---|-------------------------|--------------------------------------------------|-----------------|-----------------|-------------------------------------------------------------|-------------------------|-------------------------|-----|---------|-------------|--------|--------|-----------|-------|-------|-----------------------|-------|-------------------|-------|-------------------|
| 5 | Prima<br>ry<br>tumor    | Private in<br>primary tumor                      | 4:98544<br>2    | SLC<br>26A<br>1 | solute carrier family 26 (sulfate transporter),<br>member 1 | ENST0<br>00003<br>98520 | ENSP00<br>0003815<br>32 | 17  | V/<br>G | gTc/<br>gGc | -<br>- | 0<br>0 | 0.4<br>33 | NA    | 2.356 | high_im<br>pact       | 0.215 | medium_i<br>mpact | NA    | NA                |
| 5 | Prima<br>ry<br>tumor    | Common in<br>primary and<br>metastatic<br>tumors | 17:1822<br>0352 | SM<br>CR8       | Smith-Magenis syndrome chromosome<br>region, candidate 8    | ENST0<br>00004<br>06438 | ENSP00<br>0003850<br>25 | 417 | S/<br>T | Tct/A<br>ct | -<br>- | 0<br>0 | 0.9<br>53 | 1.905 | 2.929 | high_im<br>pact       | 0.813 | medium_i<br>mpact | 1.098 | medium_imp<br>act |
| 5 | Liver<br>metas<br>tases | Common in<br>primary and<br>metastatic<br>tumors | 17:1822<br>0352 | SM<br>CR8       | Smith-Magenis syndrome chromosome<br>region, candidate 8    | ENST0<br>00004<br>06438 | ENSP00<br>0003850<br>25 | 417 | S/<br>T | Tct/A<br>ct | -<br>- | 0<br>0 | 0.9<br>53 | 1.905 | 2.929 | high_im<br>pact       | 0.813 | medium_i<br>mpact | 1.098 | medium_imp<br>act |
| 5 | Liver<br>metas<br>tases | Private in<br>metastatic<br>tumor                | 3:14078<br>5199 | SPS<br>B4       | splA/ryanodine receptor domain and SOCS<br>box containing 4 | ENST0<br>00003<br>10546 | ENSP00<br>0003116<br>09 | 85  | D/<br>N | Gac/<br>Aac | -<br>- | 0<br>0 | 0.9<br>98 | 2.885 | 1.137 | mediu<br>m_imp<br>act | 1.724 | high_imp<br>act   | 1.959 | medium_imp<br>act |
| 5 | Liver<br>metas<br>tases | Private in<br>metastatic<br>tumor                | 17:3672<br>0413 | SR<br>CIN<br>1  | SRC kinase signaling inhibitor 1                            | ENST0<br>00003<br>98579 | ENSP00<br>0003815<br>84 | 15  | R/<br>H | cGc/<br>cAc | -<br>- | 0<br>0 | 1         | NA    | 2.128 | high_im<br>pact       | 1.903 | high_imp<br>act   | NA    | NA                |
| 5 | Liver<br>metas<br>tases | Private in<br>metastatic<br>tumor                | X:15305<br>0572 | SRP<br>K3       | SRSF protein kinase 3                                       | ENST0<br>00004<br>58681 | ENSP00<br>0004061<br>66 | 88  | I/T     | aTc/<br>aCc | -<br>- | 0<br>0 | 0.7<br>62 | NA    | 2.032 | high_im<br>pact       | 0.504 | medium_i<br>mpact | NA    | NA                |
| 5 | Liver<br>metas<br>tases | Private in<br>metastatic<br>tumor                | 7:99786<br>076  | STA<br>G3       | stromal antigen 3                                           | ENST0<br>00003<br>17296 | ENSP00<br>0003193<br>18 | 145 | G/<br>V | gGc/<br>gTc | -<br>- | 0<br>0 | 0.7<br>81 | 2.76  | 2.117 | high_im<br>pact       | 0.511 | medium_i<br>mpact | 1.68  | medium_imp<br>act |
| 5 | Prima<br>ry<br>tumor    | Common in<br>primary and<br>metastatic<br>tumors | 1:66387<br>81   | TAS<br>1R1      | taste receptor, type 1, member 1                            | ENST0<br>00004<br>37392 | ENSP00<br>0003907<br>51 | 223 | R/<br>C | Cgc/<br>Tgc | -<br>- | 0<br>0 | 1         | NA    | 1.061 | mediu<br>m_imp<br>act | 1.662 | high_imp<br>act   | NA    | NA                |
| 5 | Liver<br>metas<br>tases | Common in<br>primary and                         | 1:66387<br>81   | TAS<br>1R1      | taste receptor, type 1, member 1                            | ENST0<br>00003          | ENSP00<br>0003125       | 301 | R/<br>C | Cgc/<br>Tgc | -<br>- | 0<br>0 | 1         | NA    | 1.987 | mediu<br>m_imp        | 1.662 | high_imp<br>act   | NA    | NA                |

|   |                   |                                         |              |          |                                                                              |           |              |     |     |          |           |    |     |       |       |              |       |                |        |               |
|---|-------------------|-----------------------------------------|--------------|----------|------------------------------------------------------------------------------|-----------|--------------|-----|-----|----------|-----------|----|-----|-------|-------|--------------|-------|----------------|--------|---------------|
|   | tases             | metastatic tumors                       |              |          | 51136                                                                        | 58        |              |     |     |          |           |    |     |       |       | act          |       |                |        |               |
|   |                   |                                         |              |          |                                                                              |           |              |     |     |          |           |    |     |       |       |              |       |                |        |               |
|   |                   |                                         |              |          |                                                                              |           |              |     |     |          |           |    |     |       |       |              |       |                |        |               |
| 5 | Liver metas tases | Private in metastatic tumor             | 11:6717 1803 | TBC1 1D1 | TBC1 domain family, member 10C                                               | ENST00005 | ENSP00004436 | 44  | G/W | Ggg/Tgg  | -         | .0 | 0.9 | NA    | 0.635 | mediu m_imp  | 1.537 | high_impact    | NA     | NA            |
|   |                   |                                         |              |          |                                                                              |           |              |     |     |          |           |    |     |       |       |              |       |                |        |               |
|   |                   |                                         |              |          |                                                                              |           |              |     |     |          |           |    |     |       |       |              |       |                |        |               |
| 5 | Liver metas tases | Private in metastatic tumor             | 7:13971 7533 | TBX AS1  | thromboxane A synthase 1 (platelet)                                          | ENST00004 | ENSP00004112 | 522 | P/R | cCa/cGa  | -         | 0  | 1   | NA    | 1.928 | mediu m_imp  | 1.904 | high_impact    | NA     | NA            |
|   |                   |                                         |              |          |                                                                              |           |              |     |     |          |           |    |     |       |       |              |       |                |        |               |
|   |                   |                                         |              |          |                                                                              |           |              |     |     |          |           |    |     |       |       |              |       |                |        |               |
| 5 | Liver metas tases | Private in metastatic tumor             | 19:1611 816  | TCF 3    | transcription factor 3 (E2A immunoglobulin enhancer binding factors E12/E47) | ENST00003 | ENSP00003788 | 623 | K/E | Aaa/Gaa  | -         | 0  | 84  | NA    | 3.104 | high_im pact | 1.229 | medium_i mpact | NA     | NA            |
|   |                   |                                         |              |          |                                                                              |           |              |     |     |          |           |    |     |       |       |              |       |                |        |               |
|   |                   |                                         |              |          |                                                                              |           |              |     |     |          |           |    |     |       |       |              |       |                |        |               |
| 5 | Prima ry tumor    | Private in primary tumor                | 20:6149 2664 | TCF L5   | transcription factor-like 5 (basic helix-loop-helix)                         | ENST00003 | ENSP00003342 | 120 | C/Y | tGc/t Ac | -         | 0  | 87  | 0.895 | 2.056 | high_im pact | 0.714 | medium_i mpact | -0.17  | low_impact    |
|   |                   |                                         |              |          |                                                                              |           |              |     |     |          |           |    |     |       |       |              |       |                |        |               |
|   |                   |                                         |              |          |                                                                              |           |              |     |     |          |           |    |     |       |       |              |       |                |        |               |
| 5 | Liver metas tases | Private in metastatic tumor             | 17:5669 9054 | TEX 14   | testis expressed 14                                                          | ENST00002 | ENSP00002403 | 171 | R/W | Cgg/Tgg  | -         | 0  | 82  | 0.975 | 2.032 | high_im pact | 1.19  | medium_i mpact | -0.073 | low_impact    |
|   |                   |                                         |              |          |                                                                              |           |              |     |     |          |           |    |     |       |       |              |       |                |        |               |
|   |                   |                                         |              |          |                                                                              |           |              |     |     |          |           |    |     |       |       |              |       |                |        |               |
| 5 | Prima ry tumor    | Common in primary and metastatic tumors | 6:15545 1352 | TIA M2   | T-cell lymphoma invasion and metastasis 2                                    | ENST00004 | ENSP00004077 | 332 | R/H | cGt/c At | rs931 312 | .1 | 0.9 | 2.19  | 0.212 | mediu m_imp  | 1.943 | high_impact    | 1.324  | medium_impact |
|   |                   |                                         |              |          |                                                                              |           |              |     |     |          |           |    |     |       |       |              |       |                |        |               |
|   |                   |                                         |              |          |                                                                              |           |              |     |     |          |           |    |     |       |       |              |       |                |        |               |
| 5 | Liver metas tases | Common in primary and metastatic tumors | 6:15545 1352 | TIA M2   | T-cell lymphoma invasion and metastasis 2                                    | ENST00005 | ENSP00004314 | 578 | R/H | cGt/c At | rs931 312 | 0  | 0.9 | NA    | 1.937 | mediu m_imp  | 1.943 | high_impact    | NA     | NA            |
|   |                   |                                         |              |          |                                                                              |           |              |     |     |          |           |    |     |       |       |              |       |                |        |               |
|   |                   |                                         |              |          |                                                                              |           |              |     |     |          |           |    |     |       |       |              |       |                |        |               |
| 5 | Liver metas tases | Private in metastatic tumor             | 3:13657 3306 | TM EM2   | transmembrane protein 22                                                     | ENST00003 | ENSP00003767 | 2   | D/H | Gat/Cat  | -         | 0  | 97  | NA    | 2.929 | high_im pact | 1.512 | high_impact    | NA     | NA            |
|   |                   |                                         |              |          |                                                                              |           |              |     |     |          |           |    |     |       |       |              |       |                |        |               |
|   |                   |                                         |              |          |                                                                              |           |              |     |     |          |           |    |     |       |       |              |       |                |        |               |
| 5 | Prima ry tumor    | Private in primary tumor                | 6:32064      | TNX      | tenascin XB                                                                  | ENST0     | ENSP00       | 420 | V/  | Gtg/     | -         | 0  | 0.9 | NA    | 2.031 | high_im      | 0.986 | medium_i       | NA     | NA            |

|   |       |               |         |     |                                               |       |         |     |     |       |       |   |     |       |       |          |          |          |       |
|---|-------|---------------|---------|-----|-----------------------------------------------|-------|---------|-----|-----|-------|-------|---|-----|-------|-------|----------|----------|----------|-------|
|   | ry    | primary tumor | 372     | B   |                                               | 00003 | 0003643 |     | M   | Atg   |       | 7 |     |       | pact  |          | mpact    |          |       |
|   | tumor |               |         |     |                                               | 75244 | 93      |     |     |       |       |   |     |       |       |          |          |          |       |
|   |       |               |         |     |                                               |       |         |     |     |       |       | 0 |     |       |       |          |          |          |       |
| 5 | Liver | Private in    | 2:14812 |     |                                               | ENST0 | ENSP00  |     |     |       |       |   |     |       | mediu |          |          |          |       |
|   | metas | metastatic    | 31      | TPO | thyroid peroxidase                            | 00003 | 0003298 | 398 | S/  | aGc/  | rs217 | . | 0.9 |       |       | high_imp |          |          |       |
|   | tases | tumor         |         |     |                                               | 29066 | 69      |     | T   | aCc   | 5977  | 0 | 94  | 1.935 | 0.746 | m_imp    | 1.632    | high_imp | 1.852 |
|   |       |               |         |     |                                               |       |         |     |     |       |       | 2 |     |       |       | act      |          |          | act   |
|   |       |               |         |     |                                               |       |         |     |     |       |       | 0 |     |       |       |          |          |          |       |
| 5 | Prima | Private in    | 1:11765 | TRI |                                               | ENST0 | ENSP00  |     |     |       |       |   |     |       |       | mediu    |          |          |       |
|   | ry    | primary tumor | 9352    | M45 | tripartite motif containing 45                | 00003 | 0003584 | 356 | R/  | cGg/  | rs373 | . | 0.9 |       |       |          | high_imp |          |       |
|   | tumor |               |         |     |                                               | 69461 | 73      |     | Q   | cAg   | 8413  | 0 | 96  | NA    | 0.675 | m_imp    | 1.6      | high_imp | NA    |
|   |       |               |         |     |                                               |       |         |     |     |       |       | 3 |     |       |       | act      |          |          | NA    |
|   |       |               |         |     |                                               |       |         |     |     |       |       |   |     |       |       |          |          |          |       |
| 5 | Liver | Private in    | 17:7387 | TRI |                                               | ENST0 | ENSP00  |     |     |       |       |   |     |       |       | mediu    |          |          |       |
|   | metas | metastatic    | 4071    | M47 | tripartite motif containing 47                | 00002 | 0002548 | 187 | R/  | Cgg/  | rs460 | 0 | 0.9 |       |       | high_im  |          |          |       |
|   | tases | tumor         |         |     |                                               | 54816 | 16      |     | W   | Tgg   | 0514  | 0 | 98  | 2.24  | 2.11  | pact     | 1.876    | high_imp | 1.38  |
|   |       |               |         |     |                                               |       |         |     |     |       |       |   |     |       |       |          |          |          | act   |
|   |       |               |         |     |                                               |       |         |     |     |       |       |   |     |       |       |          |          |          |       |
| 5 | Liver | Private in    | 9:13579 | TSC |                                               | ENST0 | ENSP00  |     |     |       |       |   |     |       |       | mediu    |          |          |       |
|   | metas | metastatic    | 6804    | 1   | tuberous sclerosis 1                          | 00005 | 0004440 | 177 | R/  | cGa/  | -     | 0 | 0.9 |       |       |          | high_imp |          |       |
|   | tases | tumor         |         |     |                                               | 45250 | 17      |     | Q   | cAa   | -     | 0 | 98  | NA    | 1.654 | m_imp    | 1.677    | high_imp | NA    |
|   |       |               |         |     |                                               |       |         |     |     |       |       |   |     |       |       | act      |          |          | NA    |
|   |       |               |         |     |                                               |       |         |     |     |       |       |   |     |       |       |          |          |          |       |
| 5 | Liver | Private in    | 20:5187 | TSH |                                               | ENST0 | ENSP00  |     |     |       |       |   |     |       |       | mediu    |          |          |       |
|   | metas | metastatic    | 1153    | Z2  | teashirt zinc finger homeobox 2               | 00003 | 0003331 | 383 | G/  | Ggg/  | -     | 0 | 1   |       |       | high_im  |          |          |       |
|   | tases | tumor         |         |     |                                               | 29613 | 14      |     | R   | Cgg   | -     | 0 | 1   | NA    | 2.051 | pact     | 1.936    | high_imp | NA    |
|   |       |               |         |     |                                               |       |         |     |     |       |       |   |     |       |       |          |          |          | NA    |
|   |       |               |         |     |                                               |       |         |     |     |       |       |   |     |       |       |          |          |          |       |
| 5 | Prima | Common in     | 8:98288 | TSP |                                               | ENST0 | ENSP00  |     |     |       |       |   |     |       |       | mediu    |          |          |       |
|   | ry    | primary and   | 929     | YL5 | TSPY-like 5                                   | 00003 | 0003228 | 382 | L/I | Ctt/A | -     | 0 | 0.9 |       |       | high_im  |          |          |       |
|   | tumor | metastatic    |         |     |                                               | 22128 | 02      |     |     | tt    | -     | 0 | 59  | 2.83  | 2.929 | pact     | 0.848    | medium_i | 2.111 |
|   |       | tumors        |         |     |                                               |       |         |     |     |       |       |   |     |       |       |          |          |          | act   |
|   |       |               |         |     |                                               |       |         |     |     |       |       |   |     |       |       |          |          |          |       |
| 5 | Liver | Common in     | 8:98288 | TSP |                                               | ENST0 | ENSP00  |     |     |       |       |   |     |       |       | mediu    |          |          |       |
|   | metas | primary and   | 929     | YL5 | TSPY-like 5                                   | 00003 | 0003228 | 382 | L/I | Ctt/A | -     | 0 | 0.9 |       |       | high_im  |          |          |       |
|   | tases | metastatic    |         |     |                                               | 22128 | 02      |     |     | tt    | -     | 0 | 59  | 2.83  | 2.929 | pact     | 0.848    | medium_i | 2.111 |
|   |       | tumors        |         |     |                                               |       |         |     |     |       |       |   |     |       |       |          |          |          | act   |
|   |       |               |         |     |                                               |       |         |     |     |       |       |   |     |       |       |          |          |          |       |
| 5 | Liver | Private in    | 6:16775 | TTL |                                               | ENST0 | ENSP00  |     |     |       |       |   |     |       |       | mediu    |          |          |       |
|   | metas | metastatic    | 4289    | L2  | tubulin tyrosine ligase-like family, member 2 | 00005 | 0004406 | 228 | S/  | Agc/  | -     | . | 0.9 |       |       |          | high_imp |          |       |
|   | tases | tumor         |         |     |                                               | 40954 | 49      |     | G   | Ggc   | -     | 0 | 99  | NA    | 1.068 | m_imp    | 1.714    | high_imp | NA    |
|   |       |               |         |     |                                               |       |         |     |     |       |       |   |     |       |       | act      |          |          | NA    |

|   |                         |                                                  |                 |                 |                                         |                         |                         |      |         |             |                |   |           |       |       |                 |        |                   | 1     |                   |
|---|-------------------------|--------------------------------------------------|-----------------|-----------------|-----------------------------------------|-------------------------|-------------------------|------|---------|-------------|----------------|---|-----------|-------|-------|-----------------|--------|-------------------|-------|-------------------|
| 5 | Prima<br>ry<br>tumor    | Private in<br>primary tumor                      | 11:7792<br>0601 | USP<br>35       | ubiquitin specific peptidase 35         | ENST0<br>00004<br>41408 | ENSP00<br>0004008<br>25 | 153  | E/<br>G | gAa/<br>gGa | -              | 0 | 0         | NA    | 2.021 | high_im<br>pact | -1.429 | low_imp<br>act    | NA    | NA                |
| 5 | Prima<br>ry<br>tumor    | Private in<br>primary tumor                      | 4:14411<br>6976 | USP<br>38       | ubiquitin specific peptidase 38         | ENST0<br>00005<br>10377 | ENSP00<br>0004276<br>47 | 309  | V/<br>G | gTt/g<br>Gt | -              | 0 | 0.9<br>96 | NA    | 2.021 | high_im<br>pact | 1.527  | high_imp<br>act   | NA    | NA                |
| 5 | Prima<br>ry<br>tumor    | Private in<br>primary tumor                      | 7:12400<br>783  | VW<br>DE        | von Willebrand factor D and EGF domains | ENST0<br>00002<br>75358 | ENSP00<br>0002753<br>58 | 1050 | C/<br>Y | tGt/t<br>At | rs351<br>71886 | 0 | 0.9<br>96 | 2.34  | 2.075 | high_im<br>pact | 1.503  | high_imp<br>act   | 1.312 | medium_imp<br>act |
| 5 | Prima<br>ry<br>tumor    | Private in<br>primary tumor                      | 9:13151<br>5573 | ZER<br>1        | zer-1 homolog (C. elegans)              | ENST0<br>00002<br>91900 | ENSP00<br>0002919<br>00 | 206  | L/<br>V | Ctc/<br>Gtc | -              | 0 | 0.9<br>58 | 1.82  | 2.11  | high_im<br>pact | 1.091  | medium_i<br>mpact | 0.917 | low_impact        |
| 5 | Prima<br>ry<br>tumor    | Private in<br>primary tumor                      | 14:2399<br>4199 | ZFH<br>X2       | zinc finger homeobox 2                  | ENST0<br>00004<br>19474 | ENSP00<br>0004134<br>18 | 1651 | R/<br>H | cGc/<br>cAc | -              | 0 | 0         | 3.755 | 2.056 | high_im<br>pact | -1.54  | low_imp<br>act    | 2.655 | medium_imp<br>act |
| 5 | Prima<br>ry<br>tumor    | Private in<br>primary tumor                      | 10:7518<br>8033 | ZM<br>YN<br>D17 | zinc finger, MYND-type containing 17    | ENST0<br>00002<br>99432 | ENSP00<br>0002994<br>32 | 4    | R/<br>W | Cgg/<br>Tgg | -              | 0 | 0         | 1.59  | 2.044 | high_im<br>pact | -1.412 | low_imp<br>act    | 0.439 | low_impact        |
| 5 | Prima<br>ry<br>tumor    | Private in<br>primary tumor                      | 6:27420<br>450  | ZNF<br>184      | zinc finger protein 184                 | ENST0<br>00003<br>41087 | ENSP00<br>0003415<br>52 | 296  | H/<br>Q | caT/c<br>aG | -              | 0 | 0.8<br>8  | NA    | 2.084 | high_im<br>pact | 0.756  | medium_i<br>mpact | NA    | NA                |
| 5 | Prima<br>ry<br>tumor    | Common in<br>primary and<br>metastatic<br>tumors | 19:9271<br>985  | ZNF<br>317      | zinc finger protein 317                 | ENST0<br>00003<br>60385 | ENSP00<br>0003535<br>54 | 523  | E/<br>G | gAg/<br>gGg | -              | 0 | 0.8<br>04 | NA    | 2.084 | high_im<br>pact | 0.609  | medium_i<br>mpact | NA    | NA                |
| 5 | Liver<br>metas<br>tases | Common in<br>primary and<br>metastatic<br>tumors | 19:9271<br>985  | ZNF<br>317      | zinc finger protein 317                 | ENST0<br>00003<br>60385 | ENSP00<br>0003535<br>54 | 523  | E/<br>G | gAg/<br>gGg | -              | 0 | 0.8<br>04 | NA    | 2.084 | high_im<br>pact | 0.609  | medium_i<br>mpact | NA    | NA                |

|   |                         |                                                  |                 |            |                                                           |                         |                         |     |         |             |                |         |           |       |            |                 |        |                   |        |                   |
|---|-------------------------|--------------------------------------------------|-----------------|------------|-----------------------------------------------------------|-------------------------|-------------------------|-----|---------|-------------|----------------|---------|-----------|-------|------------|-----------------|--------|-------------------|--------|-------------------|
| 5 | Prima<br>ry<br>tumor    | Common in<br>primary and<br>metastatic<br>tumors | 9:10968<br>8001 | ZNF<br>462 | zinc finger protein 462                                   | ENST0<br>00004<br>57913 | ENSP00<br>0004145<br>70 | 603 | T/<br>N | aCc/<br>aAc | -<br>-         | 0<br>0  | 0.8<br>22 | NA    | 2.084      | high_im<br>pact | 0.639  | medium_i<br>mpact | NA     | NA                |
| 5 | Liver<br>metas<br>tases | Common in<br>primary and<br>metastatic<br>tumors | 9:10968<br>8001 | ZNF<br>462 | zinc finger protein 462                                   | ENST0<br>00004<br>57913 | ENSP00<br>0004145<br>70 | 603 | T/<br>N | aCc/<br>aAc | -<br>-         | 0<br>0  | 0.8<br>22 | NA    | 2.084      | high_im<br>pact | 0.639  | medium_i<br>mpact | NA     | NA                |
| 5 | Liver<br>metas<br>tases | Private in<br>metastatic<br>tumor                | 9:10968<br>7431 | ZNF<br>462 | zinc finger protein 462                                   | ENST0<br>00002<br>77225 | ENSP00<br>0002772<br>25 | 413 | A/<br>E | gCa/<br>gAa | -<br>-         | 0<br>0  | 0<br>0    | 0.805 | 2.084      | high_im<br>pact | -1.484 | low_impa<br>ct    | -0.239 | low_impact        |
| 5 | Prima<br>ry<br>tumor    | Private in<br>primary tumor                      | 19:5811<br>8381 | ZNF<br>530 | zinc finger protein 530                                   | ENST0<br>00003<br>32854 | ENSP00<br>0003328<br>61 | 496 | C/<br>W | tgT/t<br>gG | -<br>-         | 0<br>0  | 0.9<br>98 | 4.165 | 2.084      | high_im<br>pact | 1.818  | high_impa<br>ct   | 2.876  | medium_imp<br>act |
| 5 | Liver<br>metas<br>tases | Private in<br>metastatic<br>tumor                | 19:5837<br>0895 | ZNF<br>587 | zinc finger protein 587                                   | ENST0<br>00004<br>23137 | ENSP00<br>0003938<br>65 | 371 | R/<br>L | cGt/c<br>Tt | -<br>-         | 0<br>0  | 0.9<br>87 | NA    | 2.084      | high_im<br>pact | 1.344  | medium_i<br>mpact | NA     | NA                |
| 6 | Liver<br>metas<br>tases | Private in<br>metastatic<br>tumor                | 3:15153<br>5235 | AAD<br>AC  | arylacetamide deacetylase (esterase)                      | ENST0<br>00002<br>32892 | ENSP00<br>0002328<br>92 | 74  | T/<br>A | Acc/<br>Gcc | -<br>-         | 0<br>5  | 0.6<br>44 | 2.47  | -0.51<br>6 | low_im<br>pact  | 0.184  | medium_i<br>mpact | 4.09   | high_impact       |
| 6 | Prima<br>ry<br>tumor    | Common in<br>primary and<br>metastatic<br>tumors | 7:20762<br>646  | ABC<br>B5  | ATP-binding cassette, sub-family B<br>(MDR/TAP), member 5 | ENST0<br>00002<br>58738 | ENSP00<br>0002587<br>38 | 365 | G/<br>V | gGt/g<br>Tt | rs624<br>53384 | 0<br>11 | 0.6<br>11 | 3.195 | 2.027      | high_im<br>pact | 0.006  | medium_i<br>mpact | 1.262  | medium_imp<br>act |
| 6 | Liver<br>metas<br>tases | Common in<br>primary and<br>metastatic<br>tumors | 7:20762<br>646  | ABC<br>B5  | ATP-binding cassette, sub-family B<br>(MDR/TAP), member 5 | ENST0<br>00002<br>58738 | ENSP00<br>0002587<br>38 | 365 | G/<br>V | gGt/g<br>Tt | rs624<br>53384 | 0<br>11 | 0.6<br>11 | 3.195 | 2.027      | high_im<br>pact | 0.006  | medium_i<br>mpact | 1.262  | medium_imp<br>act |
| 6 | Liver                   | Private in                                       | 16:7735         | ADA        | ADAM metalloproteinase with thrombospondin                | ENST0                   | ENSP00                  | 626 | L/I     | Tta/A       | rs116          | 0       | 0.0       | 1.015 | 2.174      | high_im         | -1.012 | low_impa          | -0.023 | low_impact        |

|   |                         |                                                  |                  |            |                                                       |                |                   |      |         |             |       |   |     |       |       |                 |        |                   |        |                  |
|---|-------------------------|--------------------------------------------------|------------------|------------|-------------------------------------------------------|----------------|-------------------|------|---------|-------------|-------|---|-----|-------|-------|-----------------|--------|-------------------|--------|------------------|
| 6 | metas<br>tases          | metastatic<br>tumor                              | 9919             | MT<br>S18  | type 1 motif, 18                                      | 00002          | 0002828           |      | ta      | 40912       | 05    |   |     |       |       | pact            |        | ct                |        |                  |
|   | Prima<br>ry             | Common in<br>primary and<br>metastatic<br>tumors | 14:1054<br>17766 | AH<br>NAK  | AHNAK nucleoprotein 2                                 | ENST0<br>00003 | ENSP00<br>0003531 | 1341 | S/<br>F | tCt/t<br>T  | rs239 | . | 0.9 | 3.275 | 0.69  | m_imp           | 1.554  | highimpa<br>ct    | 2.368  | mediumimp<br>act |
|   | Liver<br>metas<br>tases | Common in<br>primary and<br>metastatic<br>tumors | 14:1054<br>17766 | AH<br>NAK  | AHNAK nucleoprotein 2                                 | ENST0<br>00003 | ENSP00<br>0003531 | 1341 | S/<br>F | tCt/t<br>T  | rs239 | . | 0.9 | 3.275 | 0.69  | m_imp           | 1.554  | highimpa<br>ct    | 2.368  | mediumimp<br>act |
| 6 | metas<br>tases          | Private in<br>metastatic<br>tumor                | 19:1630<br>8875  | AP1<br>M1  | adaptor-related protein complex 1, mu 1<br>subunit    | ENST0<br>00004 | ENSP00<br>0004114 | 13   | G/<br>A | gGc/<br>gCc | -     | 0 | 0.9 | NA    | 2.062 | high_im<br>pact | 0.995  | medium_i<br>mpact | NA     | NA               |
| 6 | metas<br>tases          | Private in<br>metastatic<br>tumor                | 19:1469<br>239   | APC<br>2   | adenomatosis polyposis coli 2                         | ENST0<br>00002 | ENSP00<br>0002336 | 1980 | S/<br>Y | tCc/t<br>Ac | -     | . | 0.9 | 1.845 | 0.657 | m_imp           | 1.674  | highimpa<br>ct    | 0.808  | low_impact       |
| 6 | metas<br>tases          | Private in<br>metastatic<br>tumor                | 4:77025<br>779   | ART<br>3   | ADP-ribosyltransferase 3                              | ENST0<br>00005 | ENSP00<br>0004222 | 86   | P/<br>S | Cct/T<br>ct | -     | 0 | 0   | NA    | 2.102 | high_im<br>pact | -1.239 | lowimpa<br>ct     | NA     | NA               |
| 6 | Prima<br>ry<br>tumor    | Common in<br>primary and<br>metastatic<br>tumors | 1:14311<br>65    | ATA<br>D3B | ATPase family, AAA domain containing 3B               | ENST0<br>00003 | ENSP00<br>0003680 | 473  | P/<br>S | Ccg/<br>Tcg | rs979 | 0 | 0.7 | NA    | 2.101 | high_im<br>pact | 0.52   | medium_i<br>mpact | NA     | NA               |
| 6 | metas<br>tases          | Common in<br>primary and<br>metastatic<br>tumors | 1:14311<br>65    | ATA<br>D3B | ATPase family, AAA domain containing 3B               | ENST0<br>00003 | ENSP00<br>0003117 | 639  | P/<br>S | Ccg/<br>Tcg | rs979 | 0 | 0.4 | 0     | 2.101 | high_im<br>pact | 0.142  | medium_i<br>mpact | -1.067 | low_impact       |
| 6 | Liver<br>metas          | Private in<br>metastatic                         | X:10739<br>3517  | ATG<br>4A  | ATG4 autophagy related 4 homolog A (S.<br>cerevisiae) | ENST0<br>00003 | ENSP00<br>0003783 | 290  | S/<br>L | tCa/t<br>Ta | -     | 0 | 0.0 | NA    | 2.07  | high_im<br>pact | -0.998 | lowimpa<br>ct     | NA     | NA               |



|   |       |               |         |      |                                             |       |         |      |    |       |       |   |     |       |       |             |        |               |       |               |
|---|-------|---------------|---------|------|---------------------------------------------|-------|---------|------|----|-------|-------|---|-----|-------|-------|-------------|--------|---------------|-------|---------------|
|   | tases | tumor         |         |      |                                             | 94892 | 54      |      |    |       |       |   |     |       |       |             |        |               |       |               |
|   | Liver | Private in    |         |      |                                             | ENST0 | ENSP00  |      |    |       |       |   |     |       | mediu |             |        |               |       |               |
| 6 | metas | metastatic    | 7:14045 | BRA  | v-raf murine sarcoma viral oncogene homolog | 00004 | 0004190 | 208  | V/ | gTg/  | rs113 | 0 | 0.9 | NA    | 1.786 | m_imp       | 1.951  | high_impact   | NA    | NA            |
|   | tases | tumor         | 3136    | F    | B1                                          | 96384 | 60      |      | E  | gAg   | 48802 | 0 | 98  |       |       |             |        |               |       |               |
|   | Liver | Private in    |         |      |                                             | ENST0 | ENSP00  |      |    |       |       |   |     |       |       |             |        |               |       |               |
| 6 | metas | metastatic    | 19:1535 | BR   | bromodomain containing 4                    | 00002 | 0002633 | 1046 | P/ | cCc/  | -     | 0 | 0   | 1.355 | 2.064 | high_impact | -1.491 | low_impact    | 0.343 | low_impact    |
|   | tases | tumor         | 3743    | D4   |                                             | 63377 | 77      |      | H  | cAc   |       |   |     |       |       |             |        |               |       |               |
|   | Prima | Common in     |         |      |                                             | ENST0 | ENSP00  |      |    |       |       |   |     |       |       |             |        |               |       |               |
| 6 | ry    | primary and   | 14:5009 | C14  | chromosome 14 open reading frame 104        | 00002 | 0002982 | 768  | D/ | gAt/g | rs998 | 0 | 0.6 | 1.39  | 2.062 | high_impact | 0.372  | medium_impact | 0.391 | low_impact    |
|   | tumor | metastatic    | 2471    | orf1 |                                             | 98292 | 92      |      | G  | Gt    | 9177  | 0 | 64  |       |       |             |        |               |       |               |
|   | Liver | Common in     |         |      |                                             | ENST0 | ENSP00  |      |    |       |       |   |     |       |       |             |        |               |       |               |
| 6 | metas | primary and   | 14:5009 | C14  | chromosome 14 open reading frame 104        | 00004 | 0003848 | 720  | D/ | gAt/g | rs998 | 0 | 0.4 | NA    | 2.062 | high_impact | 0.144  | medium_impact | NA    | NA            |
|   | tases | metastatic    | 2471    | orf1 |                                             | 06043 | 62      |      | G  | Gt    | 9177  | 0 | 38  |       |       |             |        |               |       |               |
|   | Prima | Private in    |         |      |                                             | ENST0 | ENSP00  |      |    |       |       |   |     |       |       |             |        |               |       |               |
| 6 | ry    | primary tumor | 19:2280 | C19  | chromosome 19 open reading frame 35         | 00003 | 0003451 | 16   | P/ | Ccc/  | rs556 | 0 | 0.7 | 1.79  | 2.929 | high_impact | 0.397  | medium_impact | 0.972 | low_impact    |
|   | tumor | primary tumor | 885     | orf3 |                                             | 42063 | 02      |      | S  | Tcc   | 62626 | 0 | 94  |       |       |             |        |               |       |               |
|   | Prima | Private in    |         |      |                                             | ENST0 | ENSP00  |      |    |       |       |   |     |       |       |             |        |               |       |               |
| 6 | ry    | primary tumor | 19:6712 | C3   | complement component 3                      | 00004 | 0004062 | 389  | V/ | Gtg/  | -     | 0 | 0   | NA    | 2.194 | high_impact | -1.461 | low_impact    | NA    | NA            |
|   | tumor | primary tumor | 372     |      |                                             | 28815 | 91      |      | L  | Ttg   |       |   |     |       |       |             |        |               |       |               |
|   | Liver | Private in    |         |      |                                             | ENST0 | ENSP00  |      |    |       |       |   |     |       |       |             |        |               |       |               |
| 6 | metas | metastatic    | 6:32261 | C6o  | chromosome 6 open reading frame 10          | 00004 | 0004111 | 365  | G/ | gGt/g | -     | 0 | 0.9 | NA    | 0.435 | mediu       | 1.613  | high_impact   | NA    | NA            |
|   | tases | tumor         | 329     | rf10 |                                             | 42822 | 64      |      | D  | At    |       | 0 | 98  |       |       |             |        |               |       |               |
|   | Prima | Private in    |         |      |                                             | ENST0 | ENSP00  |      |    |       |       |   |     |       |       |             |        |               |       |               |
| 6 | ry    | primary tumor | 6:71289 | C6o  | chromosome 6 open reading frame 57          | 00003 | 0003595 | 46   | Q/ | cAg/  | rs104 | 0 | 0.9 | 2.215 | 2.929 | high_impact | 0.636  | medium_impact | 1.437 | medium_impact |
|   | tumor | primary tumor | 189     | rf57 |                                             | 70474 | 05      |      | R  | cGg   | 8886  | 0 | 09  |       |       |             |        |               |       |               |
|   | Liver | Private in    |         |      |                                             | ENST0 | ENSP00  |      |    |       |       |   |     |       |       |             |        |               |       |               |
| 6 | metas | metastatic    | 8:86389 | CA2  | carbonic anhydrase II                       | 00002 | 0002853 | 221  | Q/ | cAg/  | -     | 0 | 1   | 4.69  | 1.922 | mediu       | 1.673  | high_impact   | 2.971 | medium_impact |
|   | tases | tumor         | 503     |      |                                             |       |         |      | R  | cGg   |       |   |     |       |       |             |        |               |       |               |





|   |       |             |         |     |                                             |       |         |      |    |       |       |    |     |       |         |        |          |       |            |
|---|-------|-------------|---------|-----|---------------------------------------------|-------|---------|------|----|-------|-------|----|-----|-------|---------|--------|----------|-------|------------|
|   | metas | metastatic  | 6472    | AH7 |                                             | 00004 | 0003869 |      | S  | aGc   |       | 97 |     |       | pact    |        | ct       |       |            |
|   | tases | tumor       |         |     |                                             | 09063 | 12      |      |    |       |       |    |     |       |         |        |          |       |            |
|   | Liver | Private in  |         | DS  |                                             | ENST0 | ENSP00  |      |    |       |       |    |     |       | high_im |        | high_imp |       |            |
| 6 | metas | metastatic  | 11:1173 | CA  | Down syndrome cell adhesion molecule like 1 | 00004 | 0003947 | 1232 | R/ | Cgc/  |       | 0  | 1   | NA    | 2.052   | 1.877  | ct       | NA    | NA         |
|   | tases | tumor       | 08650   | ML1 |                                             | 46508 | 95      |      | C  | Tgc   |       |    |     |       | pact    |        | ct       |       |            |
|   | Prima | Common in   |         |     |                                             | ENST0 | ENSP00  |      |    |       |       | 0  |     |       |         |        |          |       |            |
|   | ry    | primary and | 6:56426 | DST | dystonin                                    | 00002 | 0002443 | 2089 | L/ | Ctc/T |       | .  | 0.9 |       |         |        | high_imp |       |            |
| 6 | metas | metastatic  | 282     |     |                                             | 44364 | 64      |      | F  | tc    |       | 0  | 98  | NA    | 0.931   | 1.77   | ct       | NA    | NA         |
|   | tumor | tumors      |         |     |                                             |       |         |      |    |       |       | 2  |     |       |         | act    |          |       |            |
|   | Liver | Common in   |         |     |                                             | ENST0 | ENSP00  |      |    |       |       | 0  |     |       |         |        |          |       |            |
|   | metas | primary and | 6:56426 | DST | dystonin                                    | 00002 | 0002443 | 2089 | L/ | Ctc/T |       | .  | 0.9 |       |         |        | high_imp |       |            |
| 6 | tases | metastatic  | 282     |     |                                             | 44364 | 64      |      | F  | tc    |       | 0  | 98  | NA    | 0.931   | 1.77   | ct       | NA    | NA         |
|   | tumor | tumors      |         |     |                                             |       |         |      |    |       |       | 2  |     |       |         | act    |          |       |            |
|   | Liver | Private in  |         |     |                                             | ENST0 | ENSP00  |      |    |       |       | 0  |     |       |         |        |          |       |            |
|   | metas | metastatic  | 11:5894 | DTX | deltex homolog 4 (Drosophila)               | 00002 | 0002274 | 42   | G/ | Ggc/  |       | .  | 1   | 2.045 | 0.155   |        | high_imp |       |            |
| 6 | tases | tumor       | 0192    | 4   |                                             | 27451 | 51      |      | R  | Cgc   |       | 1  |     |       |         | 1.946  | ct       | 1.015 | medium_imp |
|   | Prima | Common in   |         |     |                                             | ENST0 | ENSP00  |      |    |       |       | 0  |     |       |         |        |          |       |            |
|   | ry    | primary and | 2:63182 | EHB | EH domain binding protein 1                 | 00004 | 0003884 | 2    | N/ | aAt/a |       | 0  | 0.0 |       |         |        | low_imp  |       |            |
| 6 | metas | metastatic  | 752     | P1  |                                             | 22032 | 42      |      | S  | Gt    |       | 0  | 22  | NA    | 2.062   | -0.723 | ct       | NA    | NA         |
|   | tumor | tumors      |         |     |                                             |       |         |      |    |       |       |    |     |       |         | pact   |          |       |            |
|   | Liver | Common in   |         |     |                                             | ENST0 | ENSP00  |      |    |       |       | 0  |     |       |         |        |          |       |            |
|   | metas | primary and | 2:63182 | EHB | EH domain binding protein 1                 | 00004 | 0003884 | 2    | N/ | aAt/a |       | 0  | 0.0 |       |         |        | low_imp  |       |            |
| 6 | tases | metastatic  | 752     | P1  |                                             | 22032 | 42      |      | S  | Gt    |       | 0  | 22  | NA    | 2.062   | -0.723 | ct       | NA    | NA         |
|   | tumor | tumors      |         |     |                                             |       |         |      |    |       |       |    |     |       |         | pact   |          |       |            |
|   | Liver | Private in  |         |     |                                             | ENST0 | ENSP00  |      |    |       |       | 0  |     |       |         |        |          |       |            |
|   | metas | metastatic  | 11:6534 | EHB | EH domain binding protein 1-like 1          | 00003 | 0003126 | 538  | V/ | gTg/  | rs659 | 0  | 0.9 |       |         |        | medium_i |       |            |
| 6 | tases | tumor       | 9756    | P1L |                                             | 09295 | 71      |      | G  | gGg   | 1182  | 0  | 75  | 1.1   | 2.064   | 1.106  | mpact    | 0.112 | low_impact |
|   | Liver | Private in  |         |     |                                             | ENST0 | ENSP00  |      |    |       |       | 0  |     |       |         |        |          |       |            |
|   | metas | metastatic  | 1:79357 | ELT | EGF, latrophilin and seven transmembrane    | 00003 | 0003597 | 620  | A/ | gCc/  | rs227 | .  | 0.9 |       |         |        | high_imp |       |            |
| 6 | tases | tumor       | 360     | D1  | domain containing 1                         | 70742 | 78      |      | G  | gGc   | 5902  | 0  | 99  | 2.84  | 1.205   | 1.915  | ct       | 1.985 | medium_imp |
|   |       |             |         |     |                                             |       |         |      |    |       |       | 0  |     |       |         |        | act      |       |            |

|   |                  |                             |                 |                |                                                         |                |                   |      |         |             |               |   |           |           |            |                       |        |                   |       | 1                 |
|---|------------------|-----------------------------|-----------------|----------------|---------------------------------------------------------|----------------|-------------------|------|---------|-------------|---------------|---|-----------|-----------|------------|-----------------------|--------|-------------------|-------|-------------------|
| 6 | Liver metastases | Private in metastatic tumor | 11:6236<br>9955 | EML<br>3       | echinoderm microtubule associated protein like 3        | ENST0<br>00004 | ENSP00<br>0004096 | 136  | D/<br>Y | Gac/<br>Tac | -             | 0 | 0         | NA        | 2.062      | high_im<br>pact       | -1.483 | low_impact        | NA    | NA                |
| 6 | Liver metastases | Private in metastatic tumor | 3:40456<br>245  | ENT<br>PD3     | ectonucleoside triphosphate diphosphohydrolase 3        | ENST0<br>00004 | ENSP00<br>0004046 | 171  | F/<br>V | Ttt/G<br>tt | -             | 0 | 0.4<br>08 | NA        | 2.044      | high_im<br>pact       | 0.145  | medium_i<br>mpact | NA    | NA                |
| 6 | Primary tumor    | Private in primary tumor    | 5:96219<br>561  | ERA<br>P2      | endoplasmic reticulum aminopeptidase 2                  | ENST0<br>00003 | ENSP00<br>0003692 | 214  | P/<br>L | cCg/<br>cTg | rs373<br>3905 | 0 | 1         | NA        | 2.306      | high_im<br>pact       | 1.991  | high_impact       | NA    | NA                |
| 6 | Primary tumor    | Private in primary tumor    | 5:13784<br>9395 | ETF<br>1       | eukaryotic translation termination factor 1             | ENST0<br>00005 | ENSP00<br>0004222 | 88   | G/<br>V | gGc/<br>gTc | -             | 0 | 0         | NA        | 2.613      | high_im<br>pact       | -1.048 | low_impact        | NA    | NA                |
| 6 | Liver metastases | Private in metastatic tumor | 15:7657<br>8762 | ETF<br>A       | electron-transfer-flavoprotein, alpha polypeptide       | ENST0<br>00004 | ENSP00<br>0003992 | 122  | T/I     | aCa/<br>aTa | rs180<br>1591 | 0 | 1         | NA        | 1.982      | mediu<br>m_imp<br>act | 1.795  | high_impact       | NA    | NA                |
| 6 | Primary tumor    | Private in primary tumor    | 11:6164<br>3380 | FAD<br>S3      | fatty acid desaturase 3                                 | ENST0<br>00002 | ENSP00<br>0002788 | 410  | K/<br>M | aAg/<br>aTg | -             | 0 | 1         | 3.38      | 1.848      | mediu<br>m_imp<br>act | 1.852  | high_impact       | 1.572 | medium_imp<br>act |
| 6 | Primary tumor    | Private in primary tumor    | X:37026<br>735  | FA<br>M47<br>C | family with sequence similarity 47, member C            | ENST0<br>00003 | ENSP00<br>0003679 | 84   | R/<br>S | agA/<br>agT | -             | 0 | 0.9<br>4  | 1.7<br>98 | -0.74<br>9 | low_im<br>pact        | 1.613  | high_impact       | 0.874 | low_impact        |
| 6 | Primary tumor    | Private in primary tumor    | 2:18667<br>8577 | FSI<br>P2      | fibrous sheath interacting protein 2                    | ENST0<br>00003 | ENSP00<br>0003444 | 6800 | K/<br>N | aaA/<br>aaT | -             | 0 | 0.7<br>59 | NA        | 2.929      | high_im<br>pact       | 0.347  | medium_i<br>mpact | NA    | NA                |
| 6 | Primary tumor    | Private in primary tumor    | 19:1008<br>226  | GRI<br>N3B     | glutamate receptor, ionotropic, N-methyl-D-aspartate 3B | ENST0<br>00002 | ENSP00<br>0002343 | 801  | D/<br>A | gAc/<br>gCc | -             | 0 | 0.9<br>98 | 2.485     | 1.063      | mediu<br>m_imp<br>act | 1.814  | high_impact       | 1.327 | medium_imp<br>act |



|   |                  |                                         |                 |            |                                                                      |                      |            |         |             |               |   |           |       |       |               |       |               |        |               |  |
|---|------------------|-----------------------------------------|-----------------|------------|----------------------------------------------------------------------|----------------------|------------|---------|-------------|---------------|---|-----------|-------|-------|---------------|-------|---------------|--------|---------------|--|
|   | tumor            |                                         |                 |            | 67569                                                                | 69                   |            |         |             |               |   |           |       |       |               |       |               |        |               |  |
| 6 | Liver metastases | Private in metastatic tumor             | 7:15064<br>8020 | KC<br>NH2  | potassium voltage-gated channel, subfamily H (eag-related), member 2 | ENST00004<br>0003876 | ENSP00712  | D/<br>N | Gac/<br>Aac | -             | 0 | 0.9<br>97 | NA    | 2.309 | high_impact   | 2.069 | high_impact   | NA     | NA            |  |
| 6 | Primary tumor    | Private in primary tumor                | 6:43039<br>077  | KLC<br>4   | kinesin light chain 4                                                | ENST00002<br>0002597 | ENSP00425  | T/<br>N | aCc/<br>aAc | -             | 0 | 0.9<br>98 | NA    | 0.531 | medium_impact | 1.643 | high_impact   | NA     | NA            |  |
| 6 | Liver metastases | Private in metastatic tumor             | 12:5324<br>2440 | KRT<br>78  | keratin 78                                                           | ENST00003<br>0003062 | ENSP0092   | L/<br>P | cTg/c<br>Cg | rs201<br>3335 | 0 | 0.9<br>96 | 3.45  | 2.018 | high_impact   | 1.348 | medium_impact | 2.093  | medium_impact |  |
| 6 | Liver metastases | Private in metastatic tumor             | 21:4599<br>9653 | KRT<br>AP1 | keratin associated protein 10-5                                      | ENST00004<br>0003832 | ENSP00268  | R/<br>P | cGc/<br>cCc | rs464<br>391  | 0 | 0.9<br>98 | 2.6   | 2.929 | high_impact   | 1.613 | high_impact   | 1.859  | medium_impact |  |
| 6 | Primary tumor    | Common in primary and metastatic tumors | 6:11243<br>0669 | LAM<br>A4  | laminin, alpha 4                                                     | ENST00002<br>0002305 | ENSP001815 | V/I     | Gta/<br>Ata | rs373<br>4292 | 0 | 0.9<br>65 | 1.94  | 2.031 | high_impact   | 0.948 | medium_impact | 0.93   | low_impact    |  |
| 6 | Liver metastases | Common in primary and metastatic tumors | 6:11243<br>0669 | LAM<br>A4  | laminin, alpha 4                                                     | ENST00003<br>0003741 | ENSP001808 | V/I     | Gta/<br>Ata | rs373<br>4292 | 0 | 0.9<br>84 | NA    | 2.031 | high_impact   | 1.139 | medium_impact | NA     | NA            |  |
| 6 | Liver metastases | Private in metastatic tumor             | 9:12497<br>5995 | LHX<br>6   | LIM homeobox 6                                                       | ENST00003<br>0003628 | ENSP00286  | S/<br>W | tCg/t<br>Gg | -             | 0 | 0.9<br>7  | 0.695 | 2.056 | high_impact   | 1.07  | medium_impact | -0.367 | low_impact    |  |
| 6 | Liver metastases | Private in metastatic tumor             | 19:2290<br>325  | LIN<br>GO  | leucine rich repeat and Ig domain containing 3                       | ENST00004<br>0003849 | ENSP00484  | N/<br>I | aAc/<br>aTc | -             | 0 | 1         | 4.505 | 2.062 | high_impact   | 1.894 | high_impact   | 3.659  | high_impact   |  |
| 6 | Liver metastases | Private in metastatic tumor             | 7:10018<br>3548 | LRC<br>H4  | leucine-rich repeats and calponin homology (CH) domain containing 4  | ENST00003<br>0003096 | ENSP0059   | R/<br>P | cGg/<br>cCg | -             | 0 | 0.9<br>99 | 1.965 | 2.089 | high_impact   | 1.974 | high_impact   | 1.225  | medium_impact |  |

|   |       |               |         |     |                                            |       |         |      |     |        |       |   |     |       |       |         |        |          |        |            |
|---|-------|---------------|---------|-----|--------------------------------------------|-------|---------|------|-----|--------|-------|---|-----|-------|-------|---------|--------|----------|--------|------------|
|   | tases | tumor         |         |     |                                            | 10300 | 89      |      |     |        |       |   |     |       |       |         |        |          |        |            |
|   | Liver | Private in    |         |     |                                            | ENST0 | ENSP00  |      |     |        |       |   |     |       |       |         |        |          |        |            |
| 6 | metas | metastatic    | 3:16951 | LRR | leucine rich repeat containing 34          | 00005 | 0004368 | 35   | L/I | Tta/A  | rs109 | 0 | 0.9 | NA    | 2.064 | high_im | 0.973  | medium_i | NA     | NA         |
|   | tases | tumor         | 4585    | C34 |                                            |       |         |      |     | ta     | 36600 |   | 58  |       |       | pact    |        | mpact    |        |            |
|   | Prima | Common in     |         |     |                                            | ENST0 | ENSP00  |      |     |        |       |   |     |       |       |         |        |          |        |            |
| 6 | ry    | primary and   | 6:90408 | MD  | MDN1, midasin homolog (yeast)              | 00004 | 0004139 | 3004 | E/  | Gaa/   | rs125 | 0 | 0.9 | 0.805 | 2.124 | high_im | 0.979  | medium_i | -0.377 | low_impact |
|   | tumor | metastatic    | 742     | N1  |                                            |       |         |      | K   | Aaa    | 30146 |   | 61  |       |       | pact    |        | mpact    |        |            |
|   | tases | tumors        |         |     |                                            | 28876 | 70      |      |     |        |       |   |     |       |       |         |        |          |        |            |
|   | Liver | Common in     |         |     |                                            | ENST0 | ENSP00  |      |     |        |       |   |     |       |       |         |        |          |        |            |
| 6 | metas | primary and   | 6:90408 | MD  | MDN1, midasin homolog (yeast)              | 00003 | 0003584 | 3004 | E/  | Gaa/   | rs125 | 0 | 0.9 | 0.805 | 2.124 | high_im | 0.979  | medium_i | -0.377 | low_impact |
|   | tases | metastatic    | 742     | N1  |                                            |       |         |      | K   | Aaa    | 30146 |   | 61  |       |       | pact    |        | mpact    |        |            |
|   | tases | tumors        |         |     |                                            | 69393 | 00      |      |     |        |       |   |     |       |       |         |        |          |        |            |
|   | Prima | Common in     |         |     |                                            | ENST0 | ENSP00  |      |     |        |       |   |     |       |       |         |        |          |        |            |
| 6 | ry    | primary and   | 1:34164 | ME  | multiple EGF-like-domains 6                | 00004 | 0004190 | 756  | R/  | cGg/   | rs755 | 0 | 0.9 | NA    | -0.33 | low_im  | 1.671  | highimpa | NA     | NA         |
|   | tumor | metastatic    | 49      | GF6 |                                            |       |         |      | L   | cTg    | 3399  |   | 98  |       | 7     | pact    |        | ct       |        |            |
|   | tases | tumors        |         |     |                                            | 85002 | 33      |      |     |        |       |   | 3   |       |       |         |        |          |        |            |
|   | Liver | Common in     |         |     |                                            | ENST0 | ENSP00  |      |     |        |       |   |     |       |       |         |        |          |        |            |
| 6 | metas | primary and   | 1:34164 | ME  | multiple EGF-like-domains 6                | 00004 | 0004190 | 756  | R/  | cGg/   | rs755 | 0 | 0.9 | NA    | -0.33 | low_im  | 1.671  | highimpa | NA     | NA         |
|   | tases | metastatic    | 49      | GF6 |                                            |       |         |      | L   | cTg    | 3399  |   | 98  |       | 7     | pact    |        | ct       |        |            |
|   | tases | tumors        |         |     |                                            | 85002 | 33      |      |     |        |       |   | 3   |       |       |         |        |          |        |            |
|   | Prima | Private in    | 22:3787 | MF  | MFNG O-fucosylpeptide                      | ENST0 | ENSP00  |      |     |        |       |   |     |       |       |         |        |          |        |            |
| 6 | ry    | primary tumor | 3005    | NG  | 3-beta-N-acetylglucosaminyltransferase     | 00004 | 0004138 | 178  | F/  | ttC/tt | -     | 0 | 0.9 | NA    | 2.051 | high_im | 0.904  | medium_i | NA     | NA         |
|   | tumor |               |         |     |                                            | 16983 | 55      |      | L   | G      |       |   | 4   |       |       | pact    |        | mpact    |        |            |
|   | Prima | Common in     |         |     |                                            | ENST0 | ENSP00  |      |     |        |       |   |     |       |       |         |        |          |        |            |
| 6 | ry    | primary and   | 6:31477 | MIC | MHC class I polypeptide-related sequence B | 00002 | 0002522 | 383  | T/  | Acc/   | rs106 | 0 | 0   | NA    | 2.062 | high_im | -1.483 | lowimpa  | NA     | NA         |
|   | tumor | metastatic    | 681     | B   |                                            |       |         |      | A   | Gcc    | 5076  |   | 0   |       |       | pact    |        | ct       |        |            |
|   | tases | tumors        |         |     |                                            | 52229 | 29      |      |     |        |       |   |     |       |       |         |        |          |        |            |
|   | Liver | Common in     |         |     |                                            | ENST0 | ENSP00  |      |     |        |       |   |     |       |       |         |        |          |        |            |
| 6 | metas | primary and   | 6:31477 | MIC | MHC class I polypeptide-related sequence B | 00003 | 0003821 | 340  | T/  | Acc/   | rs106 | 0 | 0   | NA    | 2.062 | high_im | -1.483 | lowimpa  | NA     | NA         |
|   | tases | metastatic    | 681     | B   |                                            |       |         |      | A   | Gcc    | 5076  |   | 0   |       |       | pact    |        | ct       |        |            |
|   | tases | metastatic    |         |     |                                            | 99150 | 03      |      |     |        |       |   |     |       |       |         |        |          |        |            |



|   |       |               |         |     |                                         |       |         |     |    |       |       |   |     |       |       |             |       |               |        |
|---|-------|---------------|---------|-----|-----------------------------------------|-------|---------|-----|----|-------|-------|---|-----|-------|-------|-------------|-------|---------------|--------|
|   |       | tumors        |         |     |                                         |       |         |     |    |       |       |   |     |       |       |             |       |               |        |
|   | Prima | Common in     |         |     |                                         |       |         |     |    |       |       |   |     |       |       |             |       |               |        |
| 6 | ry    | primary and   | 8:20540 | MY  |                                         | ENST0 | ENSP00  |     |    |       |       |   |     |       |       |             |       |               |        |
|   | tumor | metastatic    | 58      | OM  | myomesin (M-protein) 2, 165kDa          | 00005 | 0004283 | 346 | D/ | Gat/  | -     | . | 0.9 | NA    | 0.132 | mediu       | 1.545 | high_impact   | NA     |
|   |       | tumors        |         | 2   |                                         | 23438 | 96      |     | N  | Aat   |       | 0 | 99  |       | act   |             |       |               |        |
|   |       |               |         |     |                                         |       |         |     |    |       |       |   |     |       |       |             |       |               |        |
|   | Liver | Common in     |         |     |                                         |       |         |     |    |       |       |   |     |       |       |             |       |               |        |
| 6 | metas | primary and   | 8:20540 | MY  |                                         | ENST0 | ENSP00  |     |    |       |       |   |     |       |       |             |       |               |        |
|   | tases | metastatic    | 58      | OM  | myomesin (M-protein) 2, 165kDa          | 00005 | 0004283 | 346 | D/ | Gat/  | -     | . | 0.9 | NA    | 0.132 | mediu       | 1.545 | high_impact   | NA     |
|   |       | tumors        |         | 2   |                                         | 23438 | 96      |     | N  | Aat   |       | 0 | 99  |       | act   |             |       |               |        |
|   |       |               |         |     |                                         |       |         |     |    |       |       |   |     |       |       |             |       |               |        |
|   | Prima | Common in     |         |     |                                         |       |         |     |    |       |       |   |     |       |       |             |       |               |        |
| 6 | ry    | primary and   | 3:40231 | MY  |                                         | ENST0 | ENSP00  |     |    |       |       |   |     |       |       |             |       |               |        |
|   | tumor | metastatic    | 834     | RIP | myosin VIIA and Rab interacting protein | 00004 | 0004133 | 515 | E/ | gaG/  | -     | 0 | 0.8 | NA    | 2.197 | high_impact | 0.479 | medium_impact | NA     |
|   |       | tumors        |         |     |                                         | 58292 | 92      |     | D  | gaC   |       | 0 | 16  |       |       |             |       |               |        |
|   |       |               |         |     |                                         |       |         |     |    |       |       |   |     |       |       |             |       |               |        |
|   | Liver | Common in     |         |     |                                         |       |         |     |    |       |       |   |     |       |       |             |       |               |        |
| 6 | metas | primary and   | 3:40231 | MY  |                                         | ENST0 | ENSP00  |     |    |       |       |   |     |       |       |             |       |               |        |
|   | tases | metastatic    | 834     | RIP | myosin VIIA and Rab interacting protein | 00004 | 0004133 | 515 | E/ | gaG/  | -     | 0 | 0.8 | NA    | 2.197 | high_impact | 0.479 | medium_impact | NA     |
|   |       | tumors        |         |     |                                         | 58292 | 92      |     | D  | gaC   |       | 0 | 16  |       |       |             |       |               |        |
|   |       |               |         |     |                                         |       |         |     |    |       |       |   |     |       |       |             |       |               |        |
|   | Prima | Common in     |         |     |                                         |       |         |     |    |       |       |   |     |       |       |             |       |               |        |
| 6 | ry    | primary and   | 13:2489 | NA  | NA                                      | ENST0 | ENSP00  |     |    |       |       |   |     |       |       |             |       |               |        |
|   | tumor | metastatic    | 5437    |     |                                         | 00004 | 0003961 | 44  | R/ | Cgg/  | rs375 | . | 0.9 | NA    | 1.244 | mediu       | 1.613 | high_impact   | NA     |
|   |       | tumors        |         |     |                                         | 22229 | 92      |     | W  | Tgg   | 1356  | 0 | 98  |       | act   |             |       |               |        |
|   |       |               |         |     |                                         |       |         |     |    |       |       |   |     |       |       |             |       |               |        |
|   | Liver | Common in     |         |     |                                         |       |         |     |    |       |       |   |     |       |       |             |       |               |        |
| 6 | metas | primary and   | 13:2489 | NA  | NA                                      | ENST0 | ENSP00  |     |    |       |       |   |     |       |       |             |       |               |        |
|   | tases | metastatic    | 5437    |     |                                         | 00004 | 0003961 | 44  | R/ | Cgg/  | rs375 | . | 0.9 | NA    | 1.244 | mediu       | 1.613 | high_impact   | NA     |
|   |       | tumors        |         |     |                                         | 22229 | 92      |     | W  | Tgg   | 1356  | 0 | 98  |       | act   |             |       |               |        |
|   |       |               |         |     |                                         |       |         |     |    |       |       |   |     |       |       |             |       |               |        |
|   | Prima | Private in    | 16:1954 | NA  | NA                                      | ENST0 | ENSP00  |     |    |       |       |   |     |       |       |             |       |               |        |
| 6 | ry    | primary tumor | 8116    |     |                                         | 00003 | 0003795 | 375 | M/ | atG/a | rs719 | 0 | 0.9 | 1.845 | 2.062 | high_impact | 1.212 | medium_impact | 0.868  |
|   |       | tumors        |         |     |                                         | 96208 | 11      |     | I  | tA    | 0666  | 0 | 84  |       |       |             |       |               |        |
|   |       |               |         |     |                                         |       |         |     |    |       |       |   |     |       |       |             |       |               |        |
|   | Liver | Private in    | 3:17534 | NAA | N-acetylated alpha-linked acidic        | ENST0 | ENSP00  |     |    |       |       |   |     |       |       |             |       |               |        |
| 6 | metas | metastatic    | 5143    | LAD | dipeptidase-like 2                      | 00004 | 0004047 | 622 | P/ | cCc/  | rs986 | 0 | 0.9 | 1.04  | 2.12  | high_impact | 1.868 | high_impact   | -0.028 |
|   |       | tumors        |         |     |                                         |       |         |     | R  | cGc   | 6564  | 0 | 99  |       |       |             |       |               |        |

|   |       |             |         |     |                                       |       |         |      |    |       |       |   |     |        |       |         |       |          |       |            |
|---|-------|-------------|---------|-----|---------------------------------------|-------|---------|------|----|-------|-------|---|-----|--------|-------|---------|-------|----------|-------|------------|
|   | tases | tumor       |         | L2  |                                       | 54872 | 05      |      |    |       |       |   |     |        |       |         |       |          |       |            |
|   | Liver | Private in  |         |     |                                       | ENST0 | ENSP00  |      |    |       |       |   |     |        |       |         |       |          |       |            |
| 6 | metas | metastatic  | 2:15247 | NEB | nebulin                               | 00004 | 0004165 | 3603 | W/ | tgG/t | rs101 | 0 | 0.9 | NA     | 2.154 | high_im | 1.055 | medium_i | NA    | NA         |
|   | tases | tumor       | 6028    |     |                                       | 27231 | 78      |      | C  | gC    | 72023 |   | 93  |        |       | pact    |       | mpact    |       |            |
|   | Prima | Common in   |         |     |                                       | ENST0 | ENSP00  |      |    |       |       |   |     |        |       |         |       |          |       |            |
| 6 | ry    | primary and | 10:2115 | NEB | nebulette                             | 00003 | 0003663 | 219  | A/ | gCc/  | rs229 | 0 | 0.9 | NA     | 2.154 | high_im | 1.196 | medium_i | NA    | NA         |
|   | tumor | metastatic  | 7621    | L   |                                       | 77119 | 23      |      | D  | gAc   | 6610  |   | 96  |        |       | pact    |       | mpact    |       |            |
|   | tases | tumors      |         |     |                                       |       |         |      |    |       |       |   |     |        |       |         |       |          |       |            |
|   | Liver | Common in   |         |     |                                       | ENST0 | ENSP00  |      |    |       |       |   |     |        |       |         |       |          |       |            |
| 6 | metas | primary and | 10:2115 | NEB | nebulette                             | 00003 | 0003663 | 219  | A/ | gCc/  | rs229 | 0 | 0.9 | NA     | 2.154 | high_im | 1.196 | medium_i | NA    | NA         |
|   | tases | metastatic  | 7621    | L   |                                       | 77119 | 23      |      | D  | gAc   | 6610  |   | 96  |        |       | pact    |       | mpact    |       |            |
|   | tases | tumors      |         |     |                                       |       |         |      |    |       |       |   |     |        |       |         |       |          |       |            |
|   | Prima | Common in   |         |     |                                       | ENST0 | ENSP00  |      |    |       |       |   |     |        |       |         |       |          |       |            |
| 6 | ry    | primary and | 22:2988 | NEF | neurofilament, heavy polypeptide      | 00003 | 0003119 | 615  | P/ | cCg/  | rs576 | 0 | 0.9 | 2.215  | 2.064 | high_im | 0.907 | medium_i | 1.275 | medium_imp |
|   | tumor | metastatic  | 5473    | H   |                                       | 10624 | 97      |      | L  | cTg   | 3269  |   | 46  |        |       | pact    |       | mpact    |       | act        |
|   | tases | tumors      |         |     |                                       |       |         |      |    |       |       |   |     |        |       |         |       |          |       |            |
|   | Liver | Common in   |         |     |                                       | ENST0 | ENSP00  |      |    |       |       |   |     |        |       |         |       |          |       |            |
| 6 | metas | primary and | 22:2988 | NEF | neurofilament, heavy polypeptide      | 00003 | 0003119 | 615  | P/ | cCg/  | rs576 | 0 | 0.9 | 2.215  | 2.064 | high_im | 0.907 | medium_i | 1.275 | medium_imp |
|   | tases | metastatic  | 5473    | H   |                                       | 10624 | 97      |      | L  | cTg   | 3269  |   | 46  |        |       | pact    |       | mpact    |       | act        |
|   | tases | tumors      |         |     |                                       |       |         |      |    |       |       |   |     |        |       |         |       |          |       |            |
|   | Prima | Common in   |         |     |                                       | ENST0 | ENSP00  |      |    |       |       |   |     |        |       |         |       |          |       |            |
| 6 | ry    | primary and | 1:78392 | NEX | nexilin (F actin binding protein)     | 00003 | 0003273 | 181  | G/ | Gga/  | rs116 | 0 |     | NA     | 0.096 | mediu   | 1.833 | high_imp | NA    | NA         |
|   | tumor | metastatic  | 446     | N   |                                       | 30010 | 63      |      | R  | Aga   | 6698  |   | 1   |        |       | m_imp   |       | act      |       |            |
|   | tases | tumors      |         |     |                                       |       |         |      |    |       |       |   |     |        |       |         |       |          |       |            |
|   | Liver | Common in   |         |     |                                       | ENST0 | ENSP00  |      |    |       |       |   |     |        |       |         |       |          |       |            |
| 6 | metas | primary and | 1:78392 | NEX | nexilin (F actin binding protein)     | 00003 | 0003339 | 245  | G/ | Gga/  | rs116 | 0 |     | 2.63   | 0.501 | mediu   | 1.833 | high_imp | 1.747 | medium_imp |
|   | tases | metastatic  | 446     | N   |                                       | 34785 | 38      |      | R  | Aga   | 6698  |   | 0   |        |       | m_imp   |       | act      |       | act        |
|   | tases | tumors      |         |     |                                       |       |         |      |    |       |       |   | 4   |        |       |         |       |          |       |            |
|   | Liver | Private in  | 1:41236 | NFY | nuclear transcription factor Y, gamma | ENST0 | ENSP00  | 408  | G/ | Ggg/  | -     | 0 | 0.8 | [sent] | 2.008 | high_im | 0.788 | medium_i | NA    | NA         |
| 6 | metas | metastatic  | 345     | C   |                                       | 00003 | 0003126 |      | R  | Cgg   |       |   | 96  |        |       | pact    |       | mpact    |       |            |

|   |       |               |         |     |       |         |     |    |       |       |   |     |       |       |          |        |             |        |               |
|---|-------|---------------|---------|-----|-------|---------|-----|----|-------|-------|---|-----|-------|-------|----------|--------|-------------|--------|---------------|
|   | tases | tumor         |         |     | 08733 | 17      |     |    |       |       |   |     |       |       |          |        |             |        |               |
|   | Prima | Common in     |         |     | ENST0 | ENSP00  |     |    |       |       |   |     |       |       |          |        |             |        |               |
| 6 | ry    | primary and   | 7:14409 | NO  | 00004 | 0004195 | 485 | F/ | Ttc/C | rs269 | 0 | 0.6 | NA    | 2.051 | high_im  | 0.342  | medium_i    | NA     | NA            |
|   | tumor | metastatic    | 5600    | BO  |       |         |     | L  | tc    | 9503  |   | 32  |       |       | pact     | mpact  |             |        |               |
|   |       | tumors        |         | X   | 83238 | 65      |     |    |       |       |   |     |       |       |          |        |             |        |               |
|   | Liver | Common in     |         |     | ENST0 | ENSP00  |     |    |       |       |   |     |       |       |          |        |             |        |               |
| 6 | metas | primary and   | 7:14409 | NO  | 00002 | 0002231 | 400 | F/ | Ttc/C | rs269 | 0 | 0.6 | NA    | 2.051 | high_im  | 0.316  | medium_i    | NA     | NA            |
|   | tases | metastatic    | 5600    | BO  |       |         |     | L  | tc    | 9503  |   | 07  |       |       | pact     | mpact  |             |        |               |
|   |       | tumors        |         | X   | 23140 | 40      |     |    |       |       |   |     |       |       |          |        |             |        |               |
|   | Liver | Private in    |         |     | ENST0 | ENSP00  |     |    |       |       |   |     |       |       |          |        |             |        |               |
| 6 | metas | metastatic    | 12:1326 | NO  | 00003 | 0003288 | 252 | F/ | tTc/t | -     | 0 | 0.9 | 3.065 | 2.062 | high_im  | 1.894  | high_impact | 2.148  | medium_impact |
|   | tases | tumor         | 33170   | C4L |       |         |     | S  | Cc    |       |   | 99  |       |       | pact     | ct     |             |        |               |
|   |       |               |         |     | 30579 | 54      |     |    |       |       |   |     |       |       |          |        |             |        |               |
|   | Liver | Private in    |         |     | ENST0 | ENSP00  |     |    |       |       |   |     |       |       |          |        |             |        |               |
| 6 | metas | metastatic    | 1:66145 | NOL | 00003 | 0003669 | 10  | R/ | Cgg/  | rs490 | 0 | 0.9 | 0.805 | 2.009 | high_im  | 1.463  | medium_i    | -0.243 | low_impact    |
|   | tases | tumor         | 35      | 9   |       |         |     | W  | Tgg   | 8923  |   | 9   |       |       | pact     | mpact  |             |        |               |
|   |       |               |         |     | 77705 | 34      |     |    |       |       |   |     |       |       |          |        |             |        |               |
|   | Liver | Private in    |         |     | ENST0 | ENSP00  |     |    |       |       |   |     |       |       |          |        |             |        |               |
| 6 | metas | metastatic    | 19:4119 | NU  | 00002 | 0002528 | 24  | G/ | Ggg/  | -     | 0 | 0   | 0     | 2.062 | high_im  | -1.483 | low_impact  | -1.067 | low_impact    |
|   | tases | tumor         | 2855    | MBL |       |         |     | R  | Cgg   |       |   |     |       |       | pact     | ct     |             |        |               |
|   |       |               |         |     | 52891 | 91      |     |    |       |       |   |     |       |       |          |        |             |        |               |
|   | Prima | Private in    |         |     | ENST0 | ENSP00  |     |    |       |       |   |     |       |       |          |        |             |        |               |
| 6 | ry    | primary tumor | 19:4642 | OD  | 00003 | 0003180 | 166 | M/ | aTg/  | -     | 0 | 0.0 | 1.04  | 2.929 | high_im  | -0.901 | low_impact  | 0.151  | low_impact    |
|   | tumor |               | 17      | F3L |       |         |     | T  | aCg   |       |   | 21  |       |       | pact     | ct     |             |        |               |
|   |       |               |         | 2   | 15489 | 29      |     |    |       |       |   |     |       |       |          |        |             |        |               |
|   | Liver | Private in    |         |     | ENST0 | ENSP00  |     |    |       |       |   |     |       |       |          |        |             |        |               |
| 6 | metas | metastatic    | 14:2029 | OR4 | 00003 | 0003196 | 58  | P/ | Ccc/  | rs116 | . | 0.9 | 3.43  | 0.874 | mediu    | 1.724  | high_impact | 1.253  | medium_impact |
|   | tases | tumor         | 5779    | N2  |       |         |     | A  | Gcc   | 21884 | 0 | 99  |       |       | m_impact | act    |             |        |               |
|   |       |               |         |     | 15947 | 01      |     |    |       |       |   | 1   |       |       |          |        |             |        |               |
|   | Prima | Private in    |         |     | ENST0 | ENSP00  |     |    |       |       |   |     |       |       |          |        |             |        |               |
| 6 | ry    | primary tumor | 11:5556 | OR5 | 00003 | 0003344 | 7   | N/ | aAt/a | -     | 0 | 0.9 | 3.1   | 1.67  | mediu    | 1.564  | high_impact | 1.035  | medium_impact |
|   | tumor |               | 3051    | D14 |       |         |     | T  | Ct    |       |   | 98  |       |       | m_impact | ct     |             |        |               |
|   |       |               |         |     | 35605 | 56      |     |    |       |       |   |     |       |       |          |        |             |        |               |
|   | Prima | Common in     |         |     | ENST0 | ENSP00  |     |    |       |       |   |     |       |       |          |        |             |        |               |
| 6 | ry    | primary and   | 10:5642 | PC  | 00003 | 0003630 | 19  | S/ | Tct/G | rs110 | 0 | 0.0 | NA    | 2.075 | high_im  | -0.402 | low_impact  | NA     | NA            |
|   |       |               | 3968    | DH1 |       |         |     | A  | ct    | 04439 |   | 84  |       |       | pact     | ct     |             |        |               |

|   |       |               |         |     |                                                             |       |         |     |    |       |       |   |     |       |       |         |        |               |       |               |
|---|-------|---------------|---------|-----|-------------------------------------------------------------|-------|---------|-----|----|-------|-------|---|-----|-------|-------|---------|--------|---------------|-------|---------------|
|   | tumor | metastatic    | 5       |     |                                                             | 73956 | 67      |     |    |       |       |   |     |       |       |         |        |               |       |               |
|   |       | tumors        |         |     |                                                             |       |         |     |    |       |       |   |     |       |       |         |        |               |       |               |
|   | Liver | Common in     |         |     |                                                             |       |         |     |    |       |       |   |     |       |       |         |        |               |       |               |
| 6 | metas | primary and   | 10:5642 | PC  |                                                             | ENST0 | ENSP00  |     |    |       |       |   |     |       |       |         |        |               |       |               |
|   | tases | metastatic    | 3968    | DH1 | protocadherin-related 15                                    | 00003 | 0003630 | 19  | S/ | Tct/G | rs110 | 0 | 0.0 | NA    | 2.075 | high_im | -0.402 | low_impact    | NA    | NA            |
|   |       | tumors        |         | 5   |                                                             | 73956 | 67      |     | A  | ct    | 04439 |   |     |       |       |         |        |               |       |               |
|   | Liver | Private in    |         |     |                                                             |       |         |     |    |       |       |   |     |       |       |         |        |               |       |               |
| 6 | metas | metastatic    | 5:14058 | PC  |                                                             | ENST0 | ENSP00  |     |    |       |       |   |     |       |       |         |        |               |       |               |
|   | tases | tumor         | 1220    | DH  | protocadherin beta 11                                       | 00005 | 0004403 | 260 | R/ | Cgc/  | rs617 | 0 | 0.9 | NA    | 2.075 | high_im | 1.449  | medium_impact | NA    | NA            |
|   |       |               |         | B11 |                                                             | 36699 | 44      |     | S  | Agc   | 42028 |   |     |       |       |         |        |               |       |               |
|   | Liver | Private in    |         |     |                                                             |       |         |     |    |       |       |   |     |       |       |         |        |               |       |               |
| 6 | metas | metastatic    | 5:14951 | PD  | platelet-derived growth factor receptor, beta               | ENST0 | ENSP00  |     |    |       |       |   |     |       |       |         |        |               |       |               |
|   | tases | tumor         | 3452    | GF  | polypeptide                                                 | 00002 | 0002617 | 251 | R/ | Cgc/  | -     | 0 | 1   | 2.19  | 0.486 | mediu   | 1.669  | high_impact   | 1.247 | medium_impact |
|   |       |               |         | RB  |                                                             | 61799 | 99      |     | C  | Tgc   |       |   |     |       |       |         |        |               |       |               |
|   | Liver | Private in    |         |     |                                                             |       |         |     |    |       |       |   |     |       |       |         |        |               |       |               |
| 6 | metas | metastatic    | 20:1961 | PDY | prodynorphin                                                | ENST0 | ENSP00  |     |    |       |       |   |     |       |       |         |        |               |       |               |
|   | tases | tumor         | 128     | N   |                                                             | 00005 | 0004422 | 202 | D/ | gaC/  | -     | 1 | 0.9 | NA    | -2.94 | low_im  | 1.503  | high_impact   | NA    | NA            |
|   |       |               |         |     |                                                             | 40134 | 59      |     | E  | gaG   |       |   |     |       |       |         |        |               |       |               |
|   | Liver | Private in    |         |     |                                                             |       |         |     |    |       |       |   |     |       |       |         |        |               |       |               |
| 6 | metas | metastatic    | 3:17892 | PIK | phosphoinositide-3-kinase, catalytic, alpha                 | ENST0 | ENSP00  |     |    |       |       |   |     |       |       |         |        |               |       |               |
|   | tases | tumor         | 8035    | 3CA | polypeptide                                                 | 00002 | 0002639 | 438 | S/ | tCt/t | -     | 0 | 0.3 | 2.08  | 1.097 | mediu   | -0.344 | low_impact    | 3.754 | high_impact   |
|   |       |               |         |     |                                                             | 63967 | 67      |     | Y  | At    |       |   |     |       |       |         |        |               |       |               |
|   | Prima | Private in    |         |     |                                                             |       |         |     |    |       |       |   |     |       |       |         |        |               |       |               |
| 6 | ry    | primary tumor | 22:3853 | PLA | phospholipase A2, group VI (cytosolic, calcium-independent) | ENST0 | ENSP00  |     |    |       |       |   |     |       |       |         |        |               |       |               |
|   | tumor |               | 9220    | 2G6 |                                                             | 00004 | 0004077 | 35  | S/ | tCc/t | -     | 0 | 0   | NA    | 2.095 | high_im | -1.439 | low_impact    | NA    | NA            |
|   |       |               |         |     |                                                             | 27114 | 43      |     | C  | Gc    |       |   |     |       |       |         |        |               |       |               |
|   | Liver | Private in    |         |     |                                                             |       |         |     |    |       |       |   |     |       |       |         |        |               |       |               |
| 6 | metas | metastatic    | 3:14616 | PLS | phospholipid scramblase 2                                   | ENST0 | ENSP00  |     |    |       | rs118 |   |     |       |       |         |        |               |       |               |
|   | tases | tumor         | 7089    | CR2 |                                                             | 00005 | 0004376 | 275 | R/ | agA/  | 03654 | 0 | 0.9 | NA    | 2.441 | high_im | 1.003  | medium_impact | NA    | NA            |
|   |       |               |         |     |                                                             | 35500 | 61      |     | S  | agT   | 8     |   |     |       |       |         |        |               |       |               |
|   | Prima | Private in    |         |     |                                                             |       |         |     |    |       |       |   |     |       |       |         |        |               |       |               |
| 6 | ry    | primary tumor | 10:4708 | PPY | pancreatic polypeptide receptor 1                           | ENST0 | ENSP00  |     |    |       | rs798 | . | 0.9 |       |       |         |        |               |       |               |
|   | tumor |               | 7609    | R1  |                                                             | 00003 | 0003790 | 276 | V/ | Gtg/  | 71698 | 0 | 92  | 3.135 | 1.06  | mediu   | 1.293  | medium_impact | 3.091 | high_impact   |
|   |       |               |         |     |                                                             | 95716 | 66      |     | M  | Atg   |       |   |     |       |       |         |        |               |       |               |
|   |       |               |         |     |                                                             |       |         |     |    |       |       |   |     |       |       |         |        |               |       |               |

|   |                  |                             |                  |                 |                                                      |                |                   |      |         |             |              |         |           |        |       |                   |        |                   |        |               |
|---|------------------|-----------------------------|------------------|-----------------|------------------------------------------------------|----------------|-------------------|------|---------|-------------|--------------|---------|-----------|--------|-------|-------------------|--------|-------------------|--------|---------------|
| 6 | Liver metastases | Private in metastatic tumor | 7:12799<br>1153  | PR<br>RT4       | proline-rich transmembrane protein 4                 | ENST0<br>00005 | ENSP00<br>0004452 | 819  | C/<br>W | tgT/t<br>gG | -<br>-       | 0<br>0  | 0.9<br>27 | NA     | 2.929 | high_im<br>pact   | 0.696  | medium_i<br>mpact | NA     | NA            |
| 6 | Primary tumor    | Private in primary tumor    | 17:5286<br>462   | RAB<br>EP1      | rabaptin, RAB GTPase binding effector protein 1      | ENST0<br>00005 | ENSP00<br>0004454 | 802  | R/<br>W | Cgg/<br>Tgg | -<br>-       | 0<br>0  | 1         | NA     | 2.1   | high_im<br>pact   | 1.867  | high_impact       | NA     | NA            |
| 6 | Liver metastases | Private in metastatic tumor | 12:1135<br>65946 | RAS<br>AL1      | RAS protein activator like 1 (GAP1 like)             | ENST0<br>00002 | ENSP00<br>0002617 | 54   | G/<br>R | Ggg/<br>Cgg | -<br>-       | 0<br>99 | 0.9       | 2.085  | 1.926 | mediu<br>m_impact | 1.731  | high_impact       | 1.211  | medium_impact |
| 6 | Liver metastases | Private in metastatic tumor | 8:55539<br>057   | RP1             | retinitis pigmentosa 1 (autosomal dominant)          | ENST0<br>00002 | ENSP00<br>0002206 | 872  | R/<br>H | cGt/c<br>At | rs444<br>772 | 0<br>01 | 0.0       | 0      | 2.1   | high_im<br>pact   | -1.444 | low_impact        | -1.144 | low_impact    |
| 6 | Liver metastases | Private in metastatic tumor | 1:23794<br>7731  | RY<br>R2        | ryanodine receptor 2 (cardiac)                       | ENST0<br>00005 | ENSP00<br>0004437 | 4224 | T/<br>M | aCg/<br>aTg | -<br>-       | N<br>A  | 0.9<br>93 | NA     | NA    | NA                | 1.599  | high_impact       | NA     | NA            |
| 6 | Liver metastases | Private in metastatic tumor | 5:76171<br>281   | S10<br>OZ       | S100 calcium binding protein Z                       | ENST0<br>00003 | ENSP00<br>0003204 | 33   | E/<br>K | Gaa/<br>Aaa | -<br>-       | 0<br>97 | 0.9       | [sent] | 2.075 | high_im<br>pact   | 1.573  | high_impact       | NA     | NA            |
| 6 | Liver metastases | Private in metastatic tumor | 3:38607<br>917   | SC<br>N5A       | sodium channel, voltage-gated, type V, alpha subunit | ENST0<br>00004 | ENSP00<br>0004139 | 1221 | D/<br>N | Gac/<br>Aac | CM03<br>0274 | 0<br>97 | 0.9       | NA     | 2.121 | high_im<br>pact   | 1.603  | high_impact       | NA     | NA            |
| 6 | Liver metastases | Private in metastatic tumor | 16:2990<br>8190  | SEZ<br>6L2      | seizure related 6 homolog (mouse)-like 2             | ENST0<br>00003 | ENSP00<br>0003102 | 85   | T/<br>S | aCc/<br>aGc | -<br>-       | 0<br>0  | 0         | NA     | 2.929 | high_im<br>pact   | -1.667 | low_impact        | NA     | NA            |
| 6 | Primary tumor    | Private in primary tumor    | 3:15782<br>3711  | SH<br>OX2       | short stature homeobox 2                             | ENST0<br>00004 | ENSP00<br>0004193 | 35   | R/<br>S | Cgc/<br>Agc | -<br>-       | 0<br>72 | 0.9       | NA     | 2.056 | high_im<br>pact   | 1.088  | medium_i<br>mpact | NA     | NA            |
| 6 | Liver metastases | Private in metastatic tumor | 14:7205<br>5479  | SIP<br>A1L<br>1 | signal-induced proliferation-associated 1 like 1     | ENST0<br>00003 | ENSP00<br>0003706 | 297  | R/<br>H | cGt/c<br>At | -<br>-       | 0<br>99 | 0.9       | NA     | 1.174 | mediu<br>m_impact | 1.963  | high_impact       | NA     | NA            |

|   |                  |                                         |              |          |                                                                                  |           |              |      |     |         |             |   |        |       |       |               |        |               | 1     |               |
|---|------------------|-----------------------------------------|--------------|----------|----------------------------------------------------------------------------------|-----------|--------------|------|-----|---------|-------------|---|--------|-------|-------|---------------|--------|---------------|-------|---------------|
| 6 | Liver metastases | Private in metastatic tumor             | X:15371 6859 | SLC 10A3 | solute carrier family 10 (sodium/bile acid cotransporter family), member 3       | ENST00003 | ENSP00003772 | 196  | G/R | Ggg/Agg | -           | 0 | 1      | NA    | 2.036 | high_impact   | 1.593  | high_impact   | NA    | NA            |
| 6 | Primary tumor    | Private in primary tumor                | 9:13016 0341 | SLC 2A8  | solute carrier family 2 (facilitated glucose transporter), member 8              | ENST00003 | ENSP00003624 | 126  | G/A | gGc/gCc | -           | 0 | 0.9 71 | NA    | 2.047 | high_impact   | 1.458  | medium_impact | NA    | NA            |
| 6 | Liver metastases | Private in metastatic tumor             | 9:15423 064  | SNA PC3  | small nuclear RNA activating complex, polypeptide 3, 50kDa                       | ENST00004 | ENSP00003918 | 63   | L/M | Ctg/Atg | -           | 0 | 0.9 96 | NA    | 0.574 | medium_impact | 1.653  | high_impact   | NA    | NA            |
| 6 | Liver metastases | Private in metastatic tumor             | 20:1277 022  | SNP H    | syntaphilin                                                                      | ENST00003 | ENSP00003712 | 3    | M/V | Atg/Gtg | -           | 0 | 0.0 25 | 1.245 | 2.496 | high_impact   | -0.513 | low_impact    | 0.065 | low_impact    |
| 6 | Liver metastases | Private in metastatic tumor             | 16:1034 740  | SO X8    | SRY (sex determining region Y)-box 8                                             | ENST00002 | ENSP00002938 | 232  | K/T | aAg/aCg | -           | 0 | 0.9 67 | 3.35  | 2.008 | high_impact   | 1.1    | medium_impact | 2.619 | medium_impact |
| 6 | Primary tumor    | Common in primary and metastatic tumors | 1:11856 5953 | SPA G17  | sperm associated antigen 17                                                      | ENST00003 | ENSP00003378 | 1348 | P/L | cCa/cTa | rs109 23472 | 0 | 0.9 46 | 2.045 | 2.929 | high_impact   | 0.776  | medium_impact | 1.251 | medium_impact |
| 6 | Liver metastases | Common in primary and metastatic tumors | 1:11856 5953 | SPA G17  | sperm associated antigen 17                                                      | ENST00003 | ENSP00003378 | 1348 | P/L | cCa/cTa | rs109 23472 | 0 | 0.9 46 | 2.045 | 2.929 | high_impact   | 0.776  | medium_impact | 1.251 | medium_impact |
| 6 | Primary tumor    | Private in primary tumor                | 19:5602 9820 | SSC 5D   | scavenger receptor cysteine rich domain containing (5 domains)                   | ENST00003 | ENSP00003742 | 1393 | P/S | Ccc/Tcc | -           | 0 | 0      | 0.205 | 2.091 | high_impact   | -1.824 | low_impact    | -0.7  | low_impact    |
| 6 | Liver metastases | Private in metastatic tumor             | 20:6055 1315 | TAF 4    | TAF4 RNA polymerase II, TATA box binding protein (TBP)-associated factor, 135kDa | ENST00004 | ENSP00003990 | 920  | T/M | aCg/aTg | -           | 0 | 1      | NA    | 1.262 | medium_impact | 1.81   | high_impact   | NA    | NA            |

|   |                         |                                                  |                 |            |                                                                       |                |                   |      |         |             |                |   |           |       |       |                 |        |                   |       |                   |
|---|-------------------------|--------------------------------------------------|-----------------|------------|-----------------------------------------------------------------------|----------------|-------------------|------|---------|-------------|----------------|---|-----------|-------|-------|-----------------|--------|-------------------|-------|-------------------|
|   | tases                   | tumor                                            |                 |            | 36129                                                                 | 91             |                   |      |         | 0           |                |   |           |       | act   |                 |        |                   |       |                   |
|   |                         |                                                  |                 |            |                                                                       |                |                   |      |         | 1           |                |   |           |       |       |                 |        |                   |       |                   |
| 6 | Prima<br>ry<br>tumor    | Private in<br>primary tumor                      | 6:33281<br>590  | TAP<br>BP  | TAP binding protein (tapasin)                                         | ENST0<br>00004 | ENSP00<br>0004196 | 30   | V/<br>A | gTg/<br>gCg | -              | 0 | 0.0<br>25 | NA    | 2.062 | high_im<br>pact | -0.69  | low_impa<br>ct    | NA    | NA                |
| 6 | Liver<br>metas<br>tases | Private in<br>metastatic<br>tumor                | 3:30732<br>969  | TGF<br>BR2 | transforming growth factor, beta receptor II<br>(70/80kDa)            | ENST0<br>00004 | ENSP00<br>0003925 | 358  | R/<br>G | Cgt/<br>Ggt | rs104<br>89381 | 0 | 1         | NA    | 2.316 | high_im<br>pact | 1.566  | high_impa<br>ct   | NA    | NA                |
| 6 | Liver<br>metas<br>tases | Private in<br>metastatic<br>tumor                | 3:52256<br>029  | TLR<br>9   | toll-like receptor 9                                                  | ENST0<br>00003 | ENSP00<br>0003538 | 768  | A/<br>E | gCg/<br>gAg | -              | 0 | 0.9<br>3  | 2.32  | 2.759 | high_im<br>pact | 0.933  | medium_i<br>mpact | 1.091 | medium_imp<br>act |
| 6 | Liver<br>metas<br>tases | Private in<br>metastatic<br>tumor                | 3:13309<br>8945 | TM<br>EM1  | transmembrane protein 108                                             | ENST0<br>00005 | ENSP00<br>0004214 | 130  | E/<br>D | gaG/<br>gaC | -              | 0 | 0.9<br>07 | NA    | 2.064 | high_im<br>pact | 0.762  | medium_i<br>mpact | NA    | NA                |
| 6 | Prima<br>ry<br>tumor    | Common in<br>primary and<br>metastatic<br>tumors | 19:1872<br>9234 | TM<br>EM5  | transmembrane protein 59-like                                         | ENST0<br>00002 | ENSP00<br>0002628 | 278  | V/<br>M | Gtg/<br>Atg | -              | 0 | 0.9<br>53 | 1.665 | 2.929 | high_im<br>pact | 0.813  | medium_i<br>mpact | 0.835 | low_impact        |
| 6 | Liver<br>metas<br>tases | Common in<br>primary and<br>metastatic<br>tumors | 19:1872<br>9234 | TM<br>EM5  | transmembrane protein 59-like                                         | ENST0<br>00002 | ENSP00<br>0002628 | 278  | V/<br>M | Gtg/<br>Atg | -              | 0 | 0.9<br>53 | 1.665 | 2.929 | high_im<br>pact | 0.813  | medium_i<br>mpact | 0.835 | low_impact        |
| 6 | Liver<br>metas<br>tases | Private in<br>metastatic<br>tumor                | 6:32064<br>323  | TNX<br>B   | tenascin XB                                                           | ENST0<br>00003 | ENSP00<br>0003643 | 436  | P/<br>R | cCa/<br>cGa | -              | 0 | 0.9<br>75 | NA    | 2.031 | high_im<br>pact | 1.03   | medium_i<br>mpact | NA    | NA                |
| 6 | Liver<br>metas<br>tases | Private in<br>metastatic<br>tumor                | 15:6336<br>2098 | TP<br>M1   | tropomyosin 1 (alpha)                                                 | ENST0<br>00003 | ENSP00<br>0003346 | 232  | R/<br>C | Cgc/<br>Tgc | -              | 0 | 0.0<br>72 | NA    | 2.111 | high_im<br>pact | -0.463 | low_impa<br>ct    | NA    | NA                |
| 6 | Prima<br>ry             | Private in<br>primary tumor                      | 9:77376<br>647  | TRP<br>M6  | transient receptor potential cation channel,<br>subfamily M, member 6 | ENST0<br>00003 | ENSP00<br>0003660 | 1584 | K/<br>E | Aag/<br>Gag | rs227<br>4924  | 0 | 0.0<br>7  | NA    | 2.145 | high_im<br>pact | -0.478 | low_impa<br>ct    | NA    | NA                |

|   |        |               |         |     |                                            |       |         |      |     |       |       |   |     |       |       |         |        |          |            |
|---|--------|---------------|---------|-----|--------------------------------------------|-------|---------|------|-----|-------|-------|---|-----|-------|-------|---------|--------|----------|------------|
|   | tumor  |               |         |     |                                            | 76864 | 60      |      |     |       |       |   |     |       |       |         |        |          |            |
|   | Liver  | Private in    | 11:7552 | UV  |                                            | ENST0 | ENSP00  |      |     |       |       |   |     |       |       |         |        |          |            |
| 6 | metas  | metastatic    | 6481    | RA  | UV radiation resistance associated gene    | 00003 | 0003484 | 10   | P/  | cCc/  | rs711 | 0 | 0   | 0.345 | 2.062 | high_im | -1.483 | low_imp  | -0.705     |
|   | tases  | tumor         |         | G   |                                            | 56136 | 55      |      | H   | cAc   | 8567  |   |     |       |       | pact    |        | ct       | low_impact |
|   | Prima  | Common in     |         |     |                                            | ENST0 | ENSP00  |      |     |       |       |   |     |       |       |         |        |          |            |
| 6 | ry     | primary and   | 19:3837 | WD  | WD repeat domain 87                        | 00004 | 0004050 | 2180 | R/  | Cgg/  | rs347 | N | 0.9 | NA    | NA    | NA      | 1.5    | high_imp | NA         |
|   | tumor  | metastatic    | 7773    | R87 |                                            | 47313 | 12      |      | W   | Tgg   | 85154 | A | 95  |       |       |         |        | ct       | NA         |
|   | tumors |               |         |     |                                            |       |         |      |     |       |       |   |     |       |       |         |        |          |            |
|   | Liver  | Common in     |         |     |                                            | ENST0 | ENSP00  |      |     |       |       |   |     |       |       |         |        |          |            |
| 6 | metas  | primary and   | 19:3837 | WD  | WD repeat domain 87                        | 00003 | 0003680 | 2141 | R/  | Cgg/  | rs347 | N | 0.9 | 0.345 | NA    | NA      | 1.5    | high_imp | -0.705     |
|   | tases  | metastatic    | 7773    | R87 |                                            | 03868 | 25      |      | W   | Tgg   | 85154 | A | 95  |       |       |         |        | ct       | low_impact |
|   | tumors |               |         |     |                                            |       |         |      |     |       |       |   |     |       |       |         |        |          |            |
|   | Prima  | Private in    | 2:13573 | YSK | YSK4 Sps1/Ste20-related kinase homolog (S. | ENST0 | ENSP00  |      |     |       |       |   |     |       |       |         |        |          |            |
| 6 | ry     | primary tumor | 8850    | 4   | cerevisiae)                                | 00003 | 0003650 | 1154 | R/  | cGt/c | rs563 | . | 0.9 | 1.815 | 1.111 | mediu   | 1.894  | high_imp | 0.791      |
|   | tumor  |               |         |     |                                            | 75845 | 05      |      | H   | At    | 49597 | 0 | 99  |       |       | m_imp   |        | ct       | low_impact |
|   | tumors |               |         |     |                                            |       |         |      |     |       |       |   |     |       |       |         |        |          |            |
|   | Prima  | Private in    | 13:2042 | ZM  | zinc finger, MYM-type 5                    | ENST0 | ENSP00  |      |     |       |       |   |     |       |       |         |        |          |            |
| 6 | ry     | primary tumor | 5539    | YM5 |                                            | 00005 | 0004457 | 171  | G/  | gGa/  | rs116 | 0 | 0.9 | NA    | 2.069 | high_im | 1.018  | medium_i | NA         |
|   | tumor  |               |         |     |                                            | 02168 | 79      |      | E   | gAa   | 61541 | 0 | 6   |       |       | pact    |        | mpact    | NA         |
|   | tumors |               |         |     |                                            |       |         |      |     |       |       |   |     |       |       |         |        |          |            |
|   | Liver  | Private in    | 19:1482 | ZNF | zinc finger protein 333                    | ENST0 | ENSP00  |      |     |       |       |   |     |       |       |         |        |          |            |
| 6 | metas  | metastatic    | 9319    | 333 |                                            | 00002 | 0002925 | 394  | F/I | Tt/At | -     | 0 | 0.9 | 2.22  | 2.084 | high_im | 1.209  | medium_i | 1.073      |
|   | tases  | tumor         |         |     |                                            | 92530 | 30      |      |     | t     |       | 0 | 78  |       |       | pact    |        | mpact    | act        |
|   | tumors |               |         |     |                                            |       |         |      |     |       |       |   |     |       |       |         |        |          |            |
|   | Prima  | Private in    | 19:2160 | ZNF | zinc finger protein 493                    | ENST0 | ENSP00  |      |     |       |       |   |     |       |       |         |        |          |            |
| 6 | ry     | primary tumor | 6429    | 493 |                                            | 00003 | 0003476 | 195  | C/  | tGt/t | rs462 | 0 | 0.9 | 3.495 | 2.084 | high_im | 1.307  | medium_i | 2.255      |
|   | tumor  |               |         |     |                                            | 55504 | 91      |      | F   | Tt    | 1113  | 0 | 85  |       |       | pact    |        | mpact    | act        |
|   | tumors |               |         |     |                                            |       |         |      |     |       |       |   |     |       |       |         |        |          |            |
|   | Prima  | Common in     |         |     |                                            | ENST0 | ENSP00  |      |     |       |       |   |     |       |       |         |        |          |            |
| 6 | ry     | primary and   | 19:3805 | ZNF | zinc finger protein 571                    | 00004 | 0003926 | 573  | L/  | cTt/c | rs480 | 0 | 1   | 4.02  | 2.056 | high_im | 1.933  | high_imp | 2.917      |
|   | tumor  | metastatic    | 5612    | 571 |                                            | 51802 | 38      |      | H   | At    | 2029  | 0 | 1   |       |       | pact    |        | ct       | act        |
|   | tumors |               |         |     |                                            |       |         |      |     |       |       |   |     |       |       |         |        |          |            |
| 6 | Liver  | Common in     | 19:3805 | ZNF | zinc finger protein 571                    | ENST0 | ENSP00  | 573  | L/  | cTt/c | rs480 | 0 | 1   | 4.02  | 2.056 | high_im | 1.933  | high_imp | 2.917      |







|   |                         |                                                  |                 |                   |                                             |                         |                         |     |         |             |                     |         |           |       |       |                       |        |                   |        |                   |
|---|-------------------------|--------------------------------------------------|-----------------|-------------------|---------------------------------------------|-------------------------|-------------------------|-----|---------|-------------|---------------------|---------|-----------|-------|-------|-----------------------|--------|-------------------|--------|-------------------|
| 7 | Prima<br>ry<br>tumor    | Private in<br>primary tumor                      | 7:14045<br>3136 | BRA<br>F<br>B1    | v-raf murine sarcoma viral oncogene homolog | ENST0<br>00004<br>96384 | ENSP00<br>0004190<br>60 | 208 | V/<br>E | gTg/<br>gAg | rs113<br>48802<br>2 | 0<br>0  | 0.9<br>98 | NA    | 1.786 | mediu<br>m_imp<br>act | 1.951  | high_imp<br>ct    | NA     | NA                |
| 7 | Liver<br>metas<br>tases | Private in<br>metastatic<br>tumor                | 16:5038<br>8339 | BR<br>D7          | bromodomain containing 7                    | ENST0<br>00003<br>94688 | ENSP00<br>0003781<br>80 | 148 | Q/<br>R | cAg/<br>cGg | -<br>-              | 0<br>0  | 0.9<br>97 | 1.755 | 1.301 | mediu<br>m_imp<br>act | 1.566  | high_imp<br>ct    | 0.784  | low_impact        |
| 7 | Prima<br>ry<br>tumor    | Private in<br>primary tumor                      | 10:4547<br>3043 | C10<br>orf1<br>0  | chromosome 10 open reading frame 10         | ENST0<br>00002<br>98295 | ENSP00<br>0002982<br>95 | 146 | G/<br>R | Ggg/<br>Cgg | -<br>-              | 0<br>0  | 0.9<br>79 | 0.55  | 2.929 | high_im<br>pact       | 1.021  | medium_i<br>mpact | -0.385 | low_impact        |
| 7 | Prima<br>ry<br>tumor    | Private in<br>primary tumor                      | 10:4547<br>3043 | C10<br>orf1<br>0  | chromosome 10 open reading frame 10         | ENST0<br>00004<br>32283 | ENSP00<br>0003928<br>03 | 98  | W/<br>C | tgG/t<br>gC | -<br>-              | 0<br>0  | 0         | NA    | 2.929 | high_im<br>pact       | -1.667 | low_imp<br>ct     | NA     | NA                |
| 7 | Prima<br>ry<br>tumor    | Common in<br>primary and<br>metastatic<br>tumors | 20:3188<br>9141 | C20<br>orf1<br>14 | chromosome 20 open reading frame 114        | ENST0<br>00003<br>75378 | ENSP00<br>0003645<br>27 | 115 | V/<br>M | Gtg/<br>Atg | rs614<br>1383       | 0<br>11 | 0.7       | NA    | 2.143 | high_im<br>pact       | 0.436  | medium_i<br>mpact | NA     | NA                |
| 7 | Liver<br>metas<br>tases | Common in<br>primary and<br>metastatic<br>tumors | 20:3188<br>9141 | C20<br>orf1<br>14 | chromosome 20 open reading frame 114        | ENST0<br>00003<br>75378 | ENSP00<br>0003645<br>27 | 115 | V/<br>M | Gtg/<br>Atg | rs614<br>1383       | 0<br>11 | 0.7       | NA    | 2.143 | high_im<br>pact       | 0.436  | medium_i<br>mpact | NA     | NA                |
| 7 | Prima<br>ry<br>tumor    | Private in<br>primary tumor                      | 20:6271<br>5548 | C20<br>orf2<br>01 | chromosome 20 open reading frame 201        | ENST0<br>00003<br>08906 | ENSP00<br>0003108<br>01 | 9   | G/<br>W | Ggg/<br>Tgg | rs443<br>1000       | 0<br>85 | 0.9       | NA    | 2.929 | high_im<br>pact       | 1.106  | medium_i<br>mpact | NA     | NA                |
| 7 | Liver<br>metas<br>tases | Private in<br>metastatic<br>tumor                | 6:15177<br>9494 | C6o<br>rf21<br>1  | chromosome 6 open reading frame 211         | ENST0<br>00003<br>67294 | ENSP00<br>0003562<br>63 | 60  | S/<br>F | tCt/tT<br>t | -<br>-              | 0<br>0  | 0.9<br>97 | 2.46  | 1.137 | mediu<br>m_imp<br>act | 1.625  | high_imp<br>ct    | 1.513  | medium_imp<br>act |
| 7 | Prima<br>ry<br>tumor    | Private in<br>primary tumor                      | 9:35674<br>347  | CA9               | carbonic anhydrase IX                       | ENST0<br>00005          | ENSP00<br>0004385       | 131 | R/<br>W | Agg/<br>Tgg | rs779<br>84049      | 0<br>98 | 0.9       | NA    | 1.922 | mediu<br>m_imp        | 1.524  | high_imp<br>ct    | NA     | NA                |

|   |       |             |         |     |                                               |       |         |     |     |       |       |    |     |        |       |         |        |            |            |            |
|---|-------|-------------|---------|-----|-----------------------------------------------|-------|---------|-----|-----|-------|-------|----|-----|--------|-------|---------|--------|------------|------------|------------|
|   | tumor |             |         |     |                                               | 44074 | 41      |     |     |       |       |    |     |        |       | act     |        |            |            |            |
| 7 | Liver | Private in  | 10:7050 | CC  |                                               | ENST0 | ENSP00  |     |     |       |       |    |     |        |       |         |        |            |            |            |
|   | metas | metastatic  | 7311    | AR1 | cell division cycle and apoptosis regulator 1 | 00005 | 0004456 | 77  | P/  | Cct/T | -     | 0  | 0   | NA     | 2.084 | high_im | -1.484 | low_imp    | NA         |            |
|   | tases | tumor       |         |     |                                               | 40807 | 07      |     | S   | ct    |       |    |     |        |       | pact    | ct     | NA         | NA         |            |
|   |       |             |         |     |                                               |       |         |     |     |       |       | 0  |     |        |       |         |        |            |            |            |
| 7 | Liver | Private in  | 11:6412 | CC  |                                               | ENST0 | ENSP00  |     |     |       |       |    |     |        |       |         |        |            |            |            |
|   | metas | metastatic  | 0581    | DC8 | coiled-coil domain containing 88B             | 00003 | 0003529 | 338 | R/  | Cgc/  | -     | .  | 0.9 | NA     | 0.238 | mediu   |        | high_imp   | NA         |            |
|   | tases | tumor       |         | 8B  |                                               | 59902 | 74      |     | C   | Tgc   |       | 1  | 99  |        |       | m_imp   | 1.787  | ct         | NA         |            |
|   |       |             |         |     |                                               |       |         |     |     |       |       | 1  |     |        |       | act     |        |            | NA         |            |
| 7 | Liver | Private in  | 1:27709 | CD1 |                                               | ENST0 | ENSP00  |     |     |       |       |    |     |        |       |         |        |            |            |            |
|   | metas | metastatic  | 140     | 64L | CD164 sialomucin-like 2                       | 00003 | 0003631 | 36  | F/  | Ttt/G | -     | 0  | 0.6 | NA     | 2.929 | high_im | 0.2    | medium_i   | NA         |            |
|   | tases | tumor       |         | 2   |                                               | 74025 | 37      |     | V   | tt    |       |    | 36  |        |       | pact    | mpact  | NA         | NA         |            |
| 7 | Liver | Private in  | 1:11186 | CHI |                                               | ENST0 | ENSP00  |     |     |       |       |    |     |        |       |         |        |            |            |            |
|   | metas | metastatic  | 2963    | A   | chitinase, acidic                             | 00004 | 0004333 | 275 | G/  | Ggc/  | -     | 0  | 1   | NA     | 1.856 | mediu   |        | high_imp   | NA         |            |
|   | tases | tumor       |         |     |                                               | 89524 | 09      |     | R   | Cgc   |       |    |     |        |       | m_imp   | 2.246  | ct         | NA         |            |
|   |       |             |         |     |                                               |       |         |     |     |       |       |    |     |        |       | act     |        |            | NA         |            |
| 7 | Liver | Private in  | 16:7556 | CH  | carbohydrate (N-acetylglucosamine 6-O)        | ENST0 | ENSP00  |     |     |       |       |    |     |        |       |         |        |            |            |            |
|   | metas | metastatic  | 3330    | ST5 | sulfotransferase 5                            | 00003 | 0003387 | 318 | T/  | aCg/  | rs382 | .  | 0.9 | 2.61   | 0.651 | mediu   |        | high_imp   | 1.517      |            |
|   | tases | tumor       |         |     |                                               | 36257 | 83      |     | M   | aTg   | 6107  | 0  | 97  |        |       | m_imp   | 1.709  | ct         | medium_imp |            |
|   |       |             |         |     |                                               |       |         |     |     |       |       |    | 3   |        |       | act     |        |            | act        |            |
| 7 | Prima | Common in   | 12:1016 | CLE |                                               | ENST0 | ENSP00  |     |     |       |       |    |     |        |       |         |        |            |            |            |
|   | ry    | primary and | 7986    | C12 | C-type lectin domain family 12, member B      | 00003 | 0003445 | 182 | I/T | aTa/  | -     | 0  | 0.9 | 2.86   | 2.056 | high_im | 1.182  | medium_i   | 1.95       |            |
|   | tumor | metastatic  |         | B   |                                               | 38896 | 63      |     |     | aCa   |       |    | 82  |        |       | pact    | mpact  | act        | medium_imp |            |
|   |       | tumors      |         |     |                                               |       |         |     |     |       |       |    |     |        |       |         |        |            | act        |            |
| 7 | Liver | Common in   | 12:1016 | CLE |                                               | ENST0 | ENSP00  |     |     |       |       |    |     |        |       |         |        |            |            |            |
|   | metas | primary and | 7986    | C12 | C-type lectin domain family 12, member B      | 00003 | 0003445 | 182 | I/T | aTa/  | -     | 0  | 0.9 | 2.86   | 2.056 | high_im | 1.182  | medium_i   | 1.95       |            |
|   | tases | metastatic  |         | B   |                                               | 38896 | 63      |     |     | aCa   |       |    | 82  |        |       | pact    | mpact  | act        | medium_imp |            |
|   |       | tumors      |         |     |                                               |       |         |     |     |       |       |    |     |        |       |         |        |            | act        |            |
| 7 | Liver | Private in  | 4:14131 | CLG |                                               | ENST0 | ENSP00  |     |     |       |       |    |     |        |       |         |        |            |            |            |
|   | metas | metastatic  | 7068    | N   | calmegin                                      | 00004 | 0003927 | 352 | R/  | Cgg/  | rs125 | 0  | 0.9 | -0.305 | 2.124 | high_im | 0.74   | medium_i   | -1.392     |            |
|   | tases | tumor       |         |     |                                               | 14773 | 82      |     | W   | Tgg   | 13290 | 04 |     |        |       | pact    | mpact  | low_impact |            |            |
| 7 | Liver | Private in  | 9:17340 | CNT | centlein, centrosomal protein                 | ENST0 | ENSP00  | 562 | R/  | Cgc/  | rs380 | 0  | 0.9 | 1.995  | 0.266 | mediu   | 2.179  | high_imp   | 1.449      | medium_imp |

|   |       |               |         |     |                                    |       |         |      |    |       |       |   |     |       |       |          |       |             |        |               |
|---|-------|---------------|---------|-----|------------------------------------|-------|---------|------|----|-------|-------|---|-----|-------|-------|----------|-------|-------------|--------|---------------|
|   | metas | metastatic    | 864     | LN  |                                    | 00002 | 0002623 |      | C  | Tgc   | 8782  | . | 9   |       |       | m_imp    |       | ct          |        | act           |
|   | tases | tumor         |         |     |                                    | 62360 | 60      |      |    |       |       |   | 1   |       |       | act      |       |             |        |               |
|   |       |               |         |     |                                    |       |         |      |    |       |       |   | 4   |       |       |          |       |             |        |               |
| 7 | Prima | Private in    | 1:19739 | CR  |                                    | ENST0 | ENSP00  |      |    |       |       |   |     |       |       |          |       |             |        |               |
|   | ry    | primary tumor | 6689    | B1  | crumbs homolog 1 (Drosophila)      | 00003 | 0003563 | 394  | T/ | aCg/  | rs289 | 0 | 0.9 | NA    | 2.075 | high_im  | 1.573 | high_impact | NA     | NA            |
|   | tumor |               |         |     |                                    | 67401 | 71      |      | M  | aTg   | 39720 |   | 97  |       |       | pact     |       | ct          |        |               |
|   |       |               |         |     |                                    |       |         |      |    |       |       |   | 0   |       |       |          |       |             |        |               |
| 7 | Prima | Private in    | 8:29099 | CS  |                                    | ENST0 | ENSP00  |      |    |       |       |   |     |       |       |          |       |             |        |               |
|   | ry    | primary tumor | 92      | MD  | CUB and Sushi multiple domains 1   | 00003 | 0003348 | 1969 | T/ | aCg/  | rs655 | . | 0.9 | NA    | 0.085 | mediu    |       | high_impact | NA     | NA            |
|   | tumor |               |         | 1   |                                    | 35551 | 28      |      | M  | aTg   | 8702  | 1 | 98  |       |       | m_impact | 1.613 | ct          |        |               |
|   |       |               |         |     |                                    |       |         |      |    |       |       |   | 4   |       |       |          |       |             |        |               |
| 7 | Liver | Private in    | 15:7596 | CSP |                                    | ENST0 | ENSP00  |      |    |       |       |   |     |       |       |          |       |             |        |               |
|   | metas | metastatic    | 7926    | G4  | chondroitin sulfate proteoglycan 4 | 00003 | 0003125 | 2312 | N/ | Aac/  | -     | 0 | 0.9 | 2.31  | 2.128 | high_im  | 1.735 | high_impact | 1.274  | medium_impact |
|   | tases | tumor         |         |     |                                    | 08508 | 06      |      | H  | Cac   |       |   | 98  |       |       | pact     |       | ct          |        | act           |
|   |       |               |         |     |                                    |       |         |      |    |       |       |   |     |       |       |          |       |             |        |               |
| 7 | Liver | Private in    | 6:43188 | CUL |                                    | ENST0 | ENSP00  |      |    |       |       |   |     |       |       |          |       |             |        |               |
|   | metas | metastatic    | 273     | 9   | cullin 9                           | 00003 | 0003617 | 2092 | C/ | tGc/t | -     | 0 | 0.9 | NA    | 1.981 | mediu    |       | high_impact | NA     | NA            |
|   | tases | tumor         |         |     |                                    | 72647 | 30      |      | S  | Cc    |       |   | 99  |       |       | m_impact | 1.955 | ct          |        |               |
|   |       |               |         |     |                                    |       |         |      |    |       |       |   |     |       |       |          |       |             |        |               |
| 7 | Liver | Private in    | 2:13687 | CX  |                                    | ENST0 | ENSP00  |      |    |       |       |   |     |       |       |          |       |             |        |               |
|   | metas | metastatic    | 2509    | CR4 | chemokine (C-X-C motif) receptor 4 | 00005 | 0004403 | 200  | S/ | tCc/t | -     | 0 | 0.8 | NA    | 2.126 | high_im  | 0.046 | medium_i    | NA     | NA            |
|   | tases | tumor         |         |     |                                    | 37957 | 11      |      | Y  | Ac    |       |   | 87  |       |       | pact     |       | mpact       |        |               |
|   |       |               |         |     |                                    |       |         |      |    |       |       |   |     |       |       |          |       |             |        |               |
| 7 | Prima | Private in    | 19:4987 | DKK |                                    | ENST0 | ENSP00  |      |    |       |       |   |     |       |       |          |       |             |        |               |
|   | ry    | primary tumor | 8196    | L1  | dickkopf-like 1                    | 00002 | 0002214 | 214  | E/ | Gaa/  | rs228 | 0 | 0.9 | 0.975 | 2.119 | high_im  | 0.734 | medium_i    | -0.184 | low_impact    |
|   | tumor |               |         |     |                                    | 21498 | 98      |      | K  | Aaa   | 8481  |   | 07  |       |       | pact     |       | mpact       |        |               |
|   |       |               |         |     |                                    |       |         |      |    |       |       |   | 0   |       |       |          |       |             |        |               |
| 7 | Liver | Private in    | 7:21893 | DN  |                                    | ENST0 | ENSP00  |      |    |       |       |   |     |       |       |          |       |             |        |               |
|   | metas | metastatic    | 993     | AH1 | dynein, axonemal, heavy chain 11   | 00004 | 0004036 | 103  | V/ | Gtg/  | rs472 | . | 0.9 | NA    | 0.531 | mediu    |       | high_impact | NA     | NA            |
|   | tases | tumor         |         | 1   |                                    | 21290 | 51      |      | L  | Ttg   | 2064  | 0 | 98  |       |       | m_impact | 1.643 | ct          |        |               |
|   |       |               |         |     |                                    |       |         |      |    |       |       |   | 4   |       |       |          |       |             |        |               |
| 7 | Liver | Private in    | 6:38951 | DN  |                                    | ENST0 | ENSP00  |      |    |       |       |   |     |       |       |          |       |             |        |               |
|   | metas | metastatic    | 998     | AH8 | dynein, axonemal, heavy chain 8    | 00004 | 0004022 | 4070 | T/ | aCg/  | rs153 | 0 | 1   | NA    | 2.056 | high_im  | 1.81  | high_impact | NA     | NA            |
|   | tases | tumor         |         |     |                                    | 41566 | 94      |      | M  | aTg   | 7232  |   |     |       |       | pact     |       | ct          |        |               |
|   |       |               |         |     |                                    |       |         |      |    |       |       |   |     |       |       |          |       |             |        |               |
| 7 | Prima | Common in     | 4:34949 | DO  | docking protein 7                  | ENST0 | ENSP00  | 415  | P/ | Cct/T | rs168 | 0 | 0.9 | NA    | 0.453 | mediu    | 1.819 | high_impact | NA     | NA            |

|   |       |             |         |     |                                                  |       |         |      |    |       |       |   |     |     |       |       |         |       |          |       |             |
|---|-------|-------------|---------|-----|--------------------------------------------------|-------|---------|------|----|-------|-------|---|-----|-----|-------|-------|---------|-------|----------|-------|-------------|
|   | ry    | primary and | 56      | K7  |                                                  | 00003 | 0003743 |      | S  | ct    | 44464 | . | 98  |     |       |       | m_imp   |       | ct       |       |             |
|   | tumor | metastatic  |         |     |                                                  | 89653 | 04      |      |    |       |       |   | 0   |     |       |       | act     |       |          |       |             |
|   |       | tumors      |         |     |                                                  |       |         |      |    |       |       |   | 6   |     |       |       |         |       |          |       |             |
|   |       | Common in   |         |     |                                                  |       |         |      |    |       |       |   | 0   |     |       |       |         |       |          |       |             |
| 7 | Liver | primary and | 4:34949 | DO  |                                                  | ENST0 | ENSP00  |      |    |       |       |   |     |     |       |       | mediu   |       | high_imp |       |             |
|   | metas | metastatic  | 56      | K7  | docking protein 7                                | 00003 | 0003743 | 415  | P/ | Cct/T | rs168 | . | 0.9 |     |       |       | m_imp   | 1.819 | ct       | NA    | NA          |
|   | tases | metastatic  |         |     |                                                  | 89653 | 04      |      | S  | ct    | 44464 |   | 0   | 98  |       |       | act     |       |          |       |             |
|   |       | tumors      |         |     |                                                  |       |         |      |    |       |       |   | 6   |     |       |       |         |       |          |       |             |
| 7 | Liver | Private in  | 2:37341 | EIF | eukaryotic translation initiation factor 2-alpha | ENST0 | ENSP00  |      |    |       |       |   |     |     |       |       | high_im |       | high_imp |       | medium_imp  |
|   | metas | metastatic  | 947     | 2AK | kinase 2                                         | 00002 | 0002330 | 435  | L/ | cTt/c | -     |   | 0   | 1   | 3.615 | 2.315 | pact    | 1.766 | ct       | 2.851 | act         |
|   | tases | tumor       |         | 2   |                                                  | 33057 | 57      |      | P  | Ct    |       |   |     |     |       |       |         |       |          |       |             |
|   |       | Common in   |         |     |                                                  |       |         |      |    |       |       |   | 0   |     |       |       |         |       |          |       |             |
| 7 | Prima | primary and | 1:21177 | EIF | eukaryotic translation initiation factor 4       | ENST0 | ENSP00  |      |    |       |       |   |     |     |       |       | low_im  |       | high_imp |       |             |
|   | ry    | metastatic  | 771     | 4G3 | gamma, 3                                         | 00004 | 0003832 | 1391 | R/ | cGa/  | -     | . | 0.9 |     |       |       |         | 1.629 | ct       | NA    | NA          |
|   | tumor | metastatic  |         |     |                                                  | 00415 | 66      |      | Q  | cAa   |       |   | 2   | 95  |       |       | pact    |       |          |       |             |
|   |       | tumors      |         |     |                                                  |       |         |      |    |       |       |   | 5   |     |       |       |         |       |          |       |             |
|   |       | Common in   |         |     |                                                  |       |         |      |    |       |       |   | 0   |     |       |       |         |       |          |       |             |
| 7 | Liver | primary and | 1:21177 | EIF | eukaryotic translation initiation factor 4       | ENST0 | ENSP00  |      |    |       |       |   |     |     |       |       | low_im  |       | high_imp |       |             |
|   | metas | metastatic  | 771     | 4G3 | gamma, 3                                         | 00003 | 0003640 | 915  | R/ | cGa/  | -     | . | 0.9 |     |       |       |         | 1.763 | ct       | NA    | NA          |
|   | tases | metastatic  |         |     |                                                  | 74935 | 71      |      | Q  | cAa   |       |   | 4   | 97  |       |       | pact    |       |          |       |             |
|   |       | tumors      |         |     |                                                  |       |         |      |    |       |       |   | 4   |     |       |       |         |       |          |       |             |
| 7 | Liver | Private in  | 2:55119 | EML | echinoderm microtubule associated protein        | ENST0 | ENSP00  |      |    |       |       |   |     |     |       |       | high_im |       | high_imp |       | medium_imp  |
|   | metas | metastatic  | 614     | 6   | like 6                                           | 00003 | 0003488 | 855  | G/ | Gga/  | -     |   | 0   | 97  | 3.18  | 2.062 | pact    | 1.625 | ct       | 2.269 | act         |
|   | tases | tumor       |         |     |                                                  | 56458 | 42      |      | R  | Aga   |       |   |     |     |       |       |         |       |          |       |             |
|   |       | Common in   |         |     |                                                  |       |         |      |    |       |       |   |     |     |       |       |         |       |          |       |             |
| 7 | Prima | primary and | 11:6408 | ESR | estrogen-related receptor alpha                  | ENST0 | ENSP00  |      |    |       |       |   |     |     |       |       | high_im |       | high_imp |       | high_impact |
|   | ry    | metastatic  | 3331    | RA  |                                                  | 00004 | 0003848 | 389  | R/ | Cgc/  | rs803 |   | 0   | 1   | 3.79  | 2.036 | pact    | 1.644 | ct       | 3.336 |             |
|   | tumor | metastatic  |         |     |                                                  | 05666 | 51      |      | C  | Tgc   | 10817 |   |     |     |       |       |         |       |          |       |             |
|   |       | tumors      |         |     |                                                  |       |         |      |    |       |       |   |     |     |       |       |         |       |          |       |             |
|   |       | Common in   |         |     |                                                  |       |         |      |    |       |       |   |     |     |       |       |         |       |          |       |             |
| 7 | Liver | primary and | 11:6408 | ESR | estrogen-related receptor alpha                  | ENST0 | ENSP00  |      |    |       |       |   |     |     |       |       | high_im |       | medium_i |       | NA          |
|   | metas | metastatic  | 3331    | RA  |                                                  | 00005 | 0004447 | 170  | R/ | Cgc/  | rs803 |   | 0   | 96  | NA    | 2.036 | pact    | 1.345 | mpact    |       | NA          |
|   | tases | metastatic  |         |     |                                                  | 45035 | 10      |      | C  | Tgc   | 10817 |   |     |     |       |       |         |       |          |       |             |
|   |       | tumors      |         |     |                                                  |       |         |      |    |       |       |   |     |     |       |       |         |       |          |       |             |
| 7 | Prima | Common in   | 11:6408 | ESR | estrogen-related receptor alpha                  | ENST0 | ENSP00  | 387  | L/ | Ctc/T | rs792 |   | 0   | 0.9 | NA    | 2.036 | high_im | 1.644 | high_imp | NA    | NA          |

|   |        |               |         |     |                                               |       |         |      |    |       |       |    |     |  |       |       |         |        |           |        |            |
|---|--------|---------------|---------|-----|-----------------------------------------------|-------|---------|------|----|-------|-------|----|-----|--|-------|-------|---------|--------|-----------|--------|------------|
|   | ry     | primary and   | 3328    | RA  |                                               | 00004 | 0003859 |      | F  | tc    | 04587 | 99 |     |  | pact  |       | ct      |        |           |        |            |
|   | tumor  | metastatic    |         |     |                                               | 06310 | 71      |      |    |       |       |    |     |  |       |       |         |        |           |        |            |
|   |        | tumors        |         |     |                                               |       |         |      |    |       |       |    |     |  |       |       |         |        |           |        |            |
|   | Liver  | Common in     |         |     |                                               | ENST0 | ENSP00  |      |    |       |       |    |     |  |       |       |         |        |           |        |            |
| 7 | metas  | primary and   | 11:6408 | ESR |                                               | 00005 | 0004447 | 169  | L/ | Ctc/T | rs792 | 0  | 0.9 |  | NA    | 2.036 | high_im | 1.345  | medium_i  | NA     | NA         |
|   | tases  | metastatic    | 3328    | RA  | estrogen-related receptor alpha               | 45035 | 10      |      | F  | tc    | 04587 | 0  | 96  |  |       |       | pact    |        | mpact     |        |            |
|   | tumors |               |         |     |                                               |       |         |      |    |       |       |    |     |  |       |       |         |        |           |        |            |
| 7 | ry     | Private in    | 11:6408 | ESR |                                               | ENST0 | ENSP00  |      | L/ | cTa/c | -     | 0  | NA  |  | NA    | 2.036 | high_im | NA     | NA        | NA     | NA         |
|   | tumor  | primary tumor | 3320    | RA  | estrogen-related receptor alpha               | 45035 | 10      |      | P  | Ca    | -     | 0  | NA  |  |       |       | pact    |        |           |        |            |
|   |        |               |         |     |                                               |       |         |      |    |       |       |    |     |  |       |       |         |        |           |        |            |
| 7 | ry     | Private in    | 6:17062 | FA  |                                               | ENST0 | ENSP00  |      | E/ | gAa/  | -     | .  | 0.9 |  |       |       | mediu   |        | high_impa |        |            |
|   | tumor  | primary tumor | 7629    | M12 | family with sequence similarity 120B          | 00005 | 0004401 | 407  | V  | gTa   | -     | 1  | 96  |  | NA    | 0.09  | m_imp   | 1.579  | ct        | NA     | NA         |
|   |        |               |         | 0B  |                                               | 37664 | 25      |      |    |       |       |    |     |  |       |       |         |        |           |        |            |
|   |        |               |         |     |                                               |       |         |      |    |       |       |    |     |  |       |       |         |        |           |        |            |
| 7 | ry     | Private in    | 5:17553 | FA  |                                               | ENST0 | ENSP00  |      | Q/ | cAg/  | -     | 0  | 0.2 |  |       |       | high_im |        | low_impa  |        |            |
|   | tumor  | primary tumor | 5644    | M15 | family with sequence similarity 153, member B | 00002 | 0002534 | 300  | P  | cCg   | -     | 0  | 87  |  | 0.55  | 2.929 | pact    | -0.167 | ct        | -0.385 | low_impact |
|   |        |               |         | 3B  |                                               | 53490 | 90      |      |    |       |       |    |     |  |       |       |         |        |           |        |            |
|   |        |               |         |     |                                               |       |         |      |    |       |       |    |     |  |       |       |         |        |           |        |            |
| 7 | metas  | Private in    | 2:24234 | FAR |                                               | ENST0 | ENSP00  |      | R/ | cGc/  | -     | .  | 0.9 |  |       |       | mediu   |        | high_impa |        |            |
|   | tases  | metastatic    | 6973    | P2  | FERM, RhoGEF and pleckstrin domain protein 2  | 00005 | 0004438 | 118  | H  | cAc   | -     | 0  | 98  |  | NA    | 0.749 | m_imp   | 1.57   | ct        | NA     | NA         |
|   | tumor  |               |         |     |                                               | 45004 | 76      |      |    |       |       |    |     |  |       |       |         |        |           |        |            |
|   |        |               |         |     |                                               |       |         |      |    |       |       |    |     |  |       |       |         |        |           |        |            |
| 7 | ry     | Common in     | 19:8183 | FBN |                                               | ENST0 | ENSP00  |      | R/ | Cgg/  | rs355 | 0  | 0.9 |  |       |       | high_im |        | medium_i  |        |            |
|   | tumor  | primary and   | 871     | 3   | fibrillin 3                                   | 00002 | 0002705 | 1083 | W  | Tgg   | 79498 | 0  | 93  |  | 2.095 | 2.145 | pact    | 1.358  | mpact     | 0.859  | low_impact |
|   |        | metastatic    |         |     |                                               | 70509 | 09      |      |    |       |       |    |     |  |       |       |         |        |           |        |            |
|   |        | tumors        |         |     |                                               |       |         |      |    |       |       |    |     |  |       |       |         |        |           |        |            |
| 7 | metas  | Common in     | 19:8183 | FBN |                                               | ENST0 | ENSP00  |      | R/ | Cgg/  | rs355 | 0  | 0.9 |  |       |       | high_im |        | medium_i  |        |            |
|   | tases  | primary and   | 871     | 3   | fibrillin 3                                   | 00002 | 0002705 | 1083 | W  | Tgg   | 79498 | 0  | 93  |  | 2.095 | 2.145 | pact    | 1.358  | mpact     | 0.859  | low_impact |
|   | tumors | metastatic    |         |     |                                               | 70509 | 09      |      |    |       |       |    |     |  |       |       |         |        |           |        |            |
| 7 | Liver  | Private in    | 19:4039 | FC  | Fc fragment of IgG binding protein            | ENST0 | ENSP00  | 2670 | G/ | Ggg/  | -     | 0  | 0   |  | 3.345 | 2.062 | high_im | -1.483 | low_impa  | 2.442  | medium_imp |

|   |       |               |         |     |                                          |       |         |      |     |       |       |   |     |  |  |       |       |         |        |          |        |             |
|---|-------|---------------|---------|-----|------------------------------------------|-------|---------|------|-----|-------|-------|---|-----|--|--|-------|-------|---------|--------|----------|--------|-------------|
|   | metas | metastatic    | 2496    | GB  |                                          | 00002 | 0002213 |      | R   | Agg   |       |   |     |  |  | pact  |       | ct      |        | act      |        |             |
|   | tases | tumor         |         | P   |                                          | 21347 | 47      |      |     |       |       |   |     |  |  |       |       |         |        |          |        |             |
| 7 | Prima | Private in    | 19:4039 | FC  |                                          | ENST0 | ENSP00  |      |     |       |       |   |     |  |  |       |       |         |        |          |        |             |
|   | ry    | primary tumor | 8273    | GB  | Fc fragment of IgG binding protein       | 00002 | 0002213 | 2232 | W/  | Tgg/  |       |   |     |  |  |       |       |         |        |          |        |             |
|   | tumor |               |         | P   |                                          | 21347 | 47      |      | R   | Cgg   | -     | . | 0.8 |  |  | 4.05  | 0.276 | m_imp   | 0.649  | medium_i | 3.181  | high_impact |
|   |       |               |         |     |                                          |       |         |      |     |       |       |   |     |  |  |       |       |         |        |          |        |             |
| 7 | Prima | Private in    | 11:1117 | FDX | ferredoxin-fold anticodon binding domain | ENST0 | ENSP00  |      |     |       |       |   |     |  |  |       |       |         |        |          |        |             |
|   | ry    | primary tumor | 24133   | ACB | containing 1                             | 00004 | 0003876 | 522  | V/I | Gtc/  | rs105 | . | 0.9 |  |  | NA    | -0.27 | low_im  |        | high_imp | NA     | NA          |
|   | tumor |               |         | 1   |                                          | 28306 | 27      |      |     | Atc   | 02151 | 1 | 84  |  |  | 2     | pact  | 1.826   |        | ct       |        |             |
|   |       |               |         |     |                                          |       |         |      |     |       |       |   |     |  |  |       |       |         |        |          |        |             |
| 7 | Liver | Private in    | 2:21627 | FN1 | fibronectin 1                            | ENST0 | ENSP00  |      |     |       |       |   |     |  |  |       |       |         |        |          |        |             |
|   | metas | metastatic    | 2908    |     |                                          | 00004 | 0003944 | 814  | P/  | cCt/c | -     |   |     |  |  | NA    | 1.931 | m_imp   | 1.608  | high_imp | NA     | NA          |
|   | tases | tumor         |         |     |                                          | 21182 | 23      |      | H   | At    |       |   |     |  |  |       |       |         |        | ct       |        |             |
| 7 | Prima | Private in    | 7:48020 | FOX | forkhead box K1                          | ENST0 | ENSP00  |      |     |       |       |   |     |  |  |       |       |         |        |          |        |             |
|   | ry    | primary tumor | 75      | K1  |                                          | 00004 | 0003897 | 484  | G/  | Ggg/  | -     |   |     |  |  | NA    | 1.754 | m_imp   | 1.507  | high_imp | NA     | NA          |
|   | tumor |               |         |     |                                          | 50194 | 11      |      | R   | Agg   |       |   |     |  |  |       |       |         |        | ct       |        |             |
| 7 | Prima | Private in    | X:15376 | G6P | glucose-6-phosphate dehydrogenase        | ENST0 | ENSP00  |      |     |       |       |   |     |  |  |       |       |         |        |          |        |             |
|   | ry    | primary tumor | 0261    | D   |                                          | 00003 | 0003771 | 501  | F/  | tTc/t | CM97  |   |     |  |  | 2.13  | 2.055 | high_im | 1.774  | high_imp | 0.403  | low_impact  |
|   | tumor |               |         |     |                                          | 93564 | 94      |      | S   | Cc    | 3154  | 0 | 1   |  |  |       |       |         |        | pact     |        |             |
| 7 | Liver | Private in    | 19:3887 | GG  | gametogenetin                            | ENST0 | ENSP00  |      |     |       |       |   |     |  |  |       |       |         |        |          |        |             |
|   | metas | metastatic    | 6352    | N   |                                          | 00003 | 0003349 | 517  | A/  | gCg/  | rs568 |   |     |  |  | 0     | 2.071 | high_im | -1.447 | low_imp  | -1.116 | low_impact  |
|   | tases | tumor         |         |     |                                          | 34928 | 40      |      | V   | gTg   | 54837 | 0 | 0   |  |  |       |       |         |        | pact     |        |             |
| 7 | Prima | Private in    | 19:1005 | GRI | glutamate receptor, ionotropic,          | ENST0 | ENSP00  |      |     |       |       |   |     |  |  |       |       |         |        |          |        |             |
|   | ry    | primary tumor | 428     | N3B | N-methyl-D-aspartate 3B                  | 00002 | 0002343 | 643  | R/  | cGc/  | -     |   |     |  |  | 3.085 | 2.378 | high_im | 2.004  | high_imp | 2.048  | medium_imp  |
|   | tumor |               |         |     |                                          | 34389 | 89      |      | P   | cCc   |       |   |     |  |  |       |       |         |        | pact     |        | act         |
| 7 | Prima | Private in    | 12:9638 | HAL | histidine ammonia-lyase                  | ENST0 | ENSP00  |      |     |       |       |   |     |  |  |       |       |         |        |          |        |             |
|   | ry    | primary tumor | 4250    |     |                                          | 00005 | 0004463 | 51   | P/  | cCa/  | rs121 |   |     |  |  |       |       |         |        |          |        |             |
|   | tumor |               |         |     |                                          | 41929 | 64      |      | R   | cGa   | 43432 | 0 | 99  |  |  | NA    | 1.88  | m_imp   | 1.742  | high_imp | NA     | NA          |
|   |       |               |         |     |                                          |       |         |      |     |       | 9     |   |     |  |  |       |       |         |        | ct       |        |             |
| 7 | Liver | Private in    | 4:89385 | HE  | hect domain and RLD 5                    | ENST0 | ENSP00  |      |     |       |       |   |     |  |  |       |       |         |        |          |        |             |
|   | metas | metastatic    | 130     | RC5 |                                          | 00002 | 0002643 | 302  | C/  | tGt/t | rs786 |   |     |  |  | 2.86  | 2.114 | high_im | 0.785  | medium_i | 1.744  | medium_imp  |
|   |       |               |         |     |                                          |       |         |      | S   | Ct    | 13619 | 0 | 34  |  |  |       |       |         |        | pact     |        | act         |



|   |       |                               |         |     |                                               |       |         |     |    |        |       |   |     |       |       |         |        |             |       |            |
|---|-------|-------------------------------|---------|-----|-----------------------------------------------|-------|---------|-----|----|--------|-------|---|-----|-------|-------|---------|--------|-------------|-------|------------|
|   | tases | tumor                         |         |     |                                               | 64350 | 50      |     |    |        |       |   |     |       |       |         |        |             |       |            |
|   | Liver | Private in                    |         |     |                                               | ENST0 | ENSP00  |     |    |        |       |   |     |       |       |         |        |             |       |            |
| 7 | metas | metastatic                    | 19:3785 | HK  | HKR1, GLI-Kruppel zinc finger family member   | 00004 | 0004106 | 227 | R/ | cGt/c  | rs292 | 0 | 0.9 | NA    | 2.084 | high_im | 1.818  | high_impact | NA    | NA         |
|   | tases | tumor                         | 4040    | R1  |                                               | 14402 | 50      |     | H  | At     | 1563  | 0 | 98  | NA    |       |         |        |             |       |            |
|   | Liver | Private in                    |         |     |                                               | ENST0 | ENSP00  |     |    |        |       |   |     |       |       |         |        |             |       |            |
| 7 | metas | metastatic                    | 6:31239 | HLA | major histocompatibility complex, class I, C  | 00003 | 0003654 | 131 | V/ | gTa/   | rs230 | 0 | 0   | NA    | 2.062 | high_im | -1.483 | low_impact  | NA    | NA         |
|   | tases | tumor                         | 060     | -C  |                                               | 76237 | 12      |     | A  | gCa    | 8574  | 0 | 0   | NA    |       |         |        |             |       |            |
|   | Prima | Private in                    |         |     |                                               | ENST0 | ENSP00  |     |    |        |       |   |     |       |       |         |        |             |       |            |
| 7 | ry    | primary tumor                 | 16:7112 | HY  | hydrocephalus inducing homolog (mouse)        | 00004 | 0003985 | 451 | R/ | cGa/   | rs720 | . | 0.9 | NA    | -0.18 | low_im  | 1.613  | high_impact | NA    | NA         |
|   | tumor | primary tumor                 | 7814    | DIN |                                               | 48089 | 44      |     | P  | cCa    | 0485  | 2 | 98  | NA    | 9     | pact    |        |             |       |            |
|   | Prima | Private in                    |         |     |                                               | ENST0 | ENSP00  |     |    |        |       |   |     |       |       |         |        |             |       |            |
| 7 | ry    | primary tumor                 | 2:86400 | IMM | inner membrane protein, mitochondrial         | 00004 | 0003872 | 124 | P/ | Cct/T  | rs105 | . | 0.9 | NA    | 0.257 | mediu   | 1.566  | high_impact | NA    | NA         |
|   | tumor | primary tumor                 | 824     | T   |                                               | 09258 | 37      |     | S  | ct     | 0301  | 0 | 96  | NA    |       |         |        |             |       |            |
|   | Prima | Private in                    |         |     |                                               | ENST0 | ENSP00  |     |    |        |       |   |     |       |       |         |        |             |       |            |
| 7 | ry    | primary tumor                 | 9:95396 | IPP | inositol 1,3,4,5,6-pentakisphosphate 2-kinase | 00002 | 0002879 | 376 | L/ | Ctt/Tt | rs227 | . | 0.9 | 1.995 | 0.671 | mediu   | 1.509  | high_impact | 0.92  | low_impact |
|   | tumor | primary tumor                 | 712     | K   |                                               | 87996 | 96      |     | F  | t      | 7170  | 0 | 92  |       |       |         |        |             |       |            |
|   | Liver | Private in                    |         |     |                                               | ENST0 | ENSP00  |     |    |        |       |   |     |       |       |         |        |             |       |            |
| 7 | metas | metastatic                    | 1:22692 | ITP | inositol 1,4,5-trisphosphate 3-kinase B       | 00002 | 0002721 | 454 | G/ | Ggg/   | -     | 0 | 0.9 | 0.805 | 1.699 | mediu   | 1.702  | high_impact | 0.375 | low_impact |
|   | tases | tumor                         | 3800    | KB  |                                               | 72117 | 17      |     | W  | Tgg    |       | 0 | 88  |       |       |         |        |             |       |            |
|   | Prima | Common in                     |         |     |                                               | ENST0 | ENSP00  |     |    |        |       |   |     |       |       |         |        |             |       |            |
| 7 | ry    | primary and metastatic tumors | 16:8569 | KIA | KIAA0182                                      | 00002 | 0002534 | 657 | R/ | cGa/   | -     | . | 0.9 | 1.04  | -0.53 | low_im  | 1.724  | high_impact | 0.024 | low_impact |
|   | tumor | primary and metastatic tumors | 5081    | A01 |                                               | 53458 | 58      |     | Q  | cAa    |       | . | 98  |       | 8     | pact    |        |             |       |            |
|   | Liver | Common in                     |         |     |                                               | ENST0 | ENSP00  |     |    |        |       |   |     |       |       |         |        |             |       |            |
| 7 | metas | primary and metastatic tumors | 16:8569 | KIA | KIAA0182                                      | 00003 | 0003769 | 584 | R/ | cGa/   | -     | . | 0.9 | NA    | -0.53 | low_im  | 1.724  | high_impact | NA    | NA         |
|   | tases | tumor                         | 5081    | A01 |                                               | 93243 | 34      |     | Q  | cAa    |       | . | 98  |       | 8     | pact    |        |             |       |            |

|   |                  |                                         |                 |            |                                                                                          |                         |                         |     |         |             |                |        |            |       |                 |                   |            |               |               |               |
|---|------------------|-----------------------------------------|-----------------|------------|------------------------------------------------------------------------------------------|-------------------------|-------------------------|-----|---------|-------------|----------------|--------|------------|-------|-----------------|-------------------|------------|---------------|---------------|---------------|
| 7 | Liver metastases | Private in metastatic tumor             | 19:5153<br>5366 | KLK<br>12  | kallikrein-related peptidase 12                                                          | ENST0<br>00005<br>31374 | ENSP00<br>0004361<br>21 | 75  | H/<br>D | Cac/<br>Gac | -<br>-         | 0<br>0 | 0.2<br>75  | NA    | 2.111           | high_im<br>pact   | -0.096     | low_impact    | NA            | NA            |
| 7 | Liver metastases | Private in metastatic tumor             | 17:3903<br>2654 | KRT<br>20  | keratin 20                                                                               | ENST0<br>00001<br>67588 | ENSP00<br>0001675<br>88 | 412 | V/<br>F | Gtc/T<br>tc | -<br>-         | 0<br>0 | 0<br>3.285 | 2.111 | high_im<br>pact | -1.545            | low_impact | 2.4           | medium_impact |               |
| 7 | Liver metastases | Private in metastatic tumor             | 17:3892<br>2891 | KRT<br>26  | keratin 26                                                                               | ENST0<br>00003<br>35552 | ENSP00<br>0003347<br>98 | 428 | T/I     | aCa/<br>aTa | -<br>-         | 0<br>0 | 0.9<br>84  | 2.755 | 2.018           | high_im<br>pact   | 1.012      | medium_impact | 1.448         | medium_impact |
| 7 | Primary tumor    | Common in primary and metastatic tumors | 19:5517<br>9364 | LIL<br>RB4 | leukocyte immunoglobulin-like receptor, subfamily B (with TM and ITIM domains), member 4 | ENST0<br>00003<br>91736 | ENSP00<br>0003756<br>16 | 414 | Q/<br>R | cAg/<br>cGg | rs104<br>8801  | 0<br>0 | 0.0<br>16  | 2.845 | 2.01            | high_im<br>pact   | -0.63      | low_impact    | 1.88          | medium_impact |
| 7 | Liver metastases | Common in primary and metastatic tumors | 19:5517<br>9364 | LIL<br>RB4 | leukocyte immunoglobulin-like receptor, subfamily B (with TM and ITIM domains), member 4 | ENST0<br>00003<br>91736 | ENSP00<br>0003756<br>16 | 414 | Q/<br>R | cAg/<br>cGg | rs104<br>8801  | 0<br>0 | 0.0<br>16  | 2.845 | 2.01            | high_im<br>pact   | -0.63      | low_impact    | 1.88          | medium_impact |
| 7 | Primary tumor    | Private in primary tumor                | 7:20199<br>472  | MA<br>CC1  | metastasis associated in colon cancer 1                                                  | ENST0<br>00004<br>00331 | ENSP00<br>0003831<br>85 | 171 | L/<br>H | cTt/c<br>At | -<br>-         | 0<br>0 | 0.9<br>99  | 2.095 | 1.177           | mediu<br>m_impact | 1.867      | high_impact   | 0.957         | low_impact    |
| 7 | Primary tumor    | Private in primary tumor                | 6:13668<br>1876 | MA<br>P7   | microtubule-associated protein 7                                                         | ENST0<br>00004<br>38100 | ENSP00<br>0004007<br>90 | 573 | H/<br>Y | Cat/T<br>at | -<br>-         | 0<br>0 | 0.9<br>99  | NA    | 0.266           | mediu<br>m_impact | 1.682      | high_impact   | NA            | NA            |
| 7 | Liver metastases | Private in metastatic tumor             | 1:11090<br>916  | MA<br>SP2  | mannan-binding lectin serine peptidase 2                                                 | ENST0<br>00004<br>00897 | ENSP00<br>0003836<br>90 | 371 | D/<br>Y | Gat/<br>Tat | rs127<br>11521 | 0<br>0 | 0.9<br>98  | 3.02  | 1.171           | mediu<br>m_impact | 1.659      | high_impact   | 2.162         | medium_impact |
| 7 | Primary tumor    | Common in                               | 5:15434         | MR         | mitochondrial ribosomal protein L22                                                      | ENST0                   | ENSP00                  | 169 | R/      | Cga/        | -              | 0      | 0.9        | NA    | 2.159           | high_im           | 0.759      | medium_i      | NA            | NA            |

|   |       |               |         |     |                                                |  |       |         |      |     |       |       |    |     |       |       |       |          |  |             |       |       |               |               |  |  |
|---|-------|---------------|---------|-----|------------------------------------------------|--|-------|---------|------|-----|-------|-------|----|-----|-------|-------|-------|----------|--|-------------|-------|-------|---------------|---------------|--|--|
|   | ry    | primary and   | 6263    | PL2 |                                                |  | 00004 | 0004111 | G    | Gga |       |       | 23 |     |       | pact  |       | mpact    |  |             |       |       |               |               |  |  |
|   | tumor | metastatic    |         | 2   |                                                |  | 39747 | 77      |      |     |       |       |    |     |       |       |       |          |  |             |       |       |               |               |  |  |
|   |       | tumors        |         |     |                                                |  |       |         |      |     |       |       |    |     |       |       |       |          |  |             |       |       |               |               |  |  |
|   | Liver | Common in     |         |     |                                                |  | ENST0 | ENSP00  |      |     |       |       |    |     |       |       |       |          |  |             |       |       |               |               |  |  |
| 7 | metas | primary and   | 5:15434 | MR  |                                                |  | 00004 | 0004111 | 169  | R/  | Cga/  |       | 0  | 0.9 |       | NA    | 2.159 | high_im  |  | medium_i    |       |       |               |               |  |  |
|   | tases | metastatic    | 6263    | PL2 | mitochondrial ribosomal protein L22            |  | 00004 | 0004111 | 169  | G   | Gga   | -     | 0  | 23  |       |       |       | pact     |  | 0.759       | mpact |       | NA            | NA            |  |  |
|   |       | tumors        |         | 2   |                                                |  | 39747 | 77      |      |     |       |       |    |     |       |       |       |          |  |             |       |       |               |               |  |  |
|   | Prima | Common in     |         |     |                                                |  | ENST0 | ENSP00  |      |     |       |       |    |     |       |       |       |          |  |             |       |       |               |               |  |  |
| 7 | ry    | primary and   | 14:7556 | NEK | NIMA (never in mitosis gene a)- related kinase |  | 00002 | 0002386 | 744  | T/I | aCt/a |       | 0  | 0.7 |       |       |       | high_im  |  | medium_i    |       |       |               |               |  |  |
|   | tumor | metastatic    | 2077    | 9   | 9                                              |  | 00002 | 0002386 | 744  | T/I | Tt    | -     | 0  | 66  | 0.695 | 2.128 |       | pact     |  | 0.519       | mpact |       | -0.403        | low_impact    |  |  |
|   |       | tumors        |         |     |                                                |  | 38616 | 16      |      |     |       |       |    |     |       |       |       |          |  |             |       |       |               |               |  |  |
|   | Liver | Common in     |         |     |                                                |  | ENST0 | ENSP00  |      |     |       |       |    |     |       |       |       |          |  |             |       |       |               |               |  |  |
| 7 | metas | primary and   | 14:7556 | NEK | NIMA (never in mitosis gene a)- related kinase |  | 00002 | 0002386 | 744  | T/I | aCt/a |       | 0  | 0.7 |       |       |       | high_im  |  | medium_i    |       |       |               |               |  |  |
|   | tases | metastatic    | 2077    | 9   | 9                                              |  | 00002 | 0002386 | 744  | T/I | Tt    | -     | 0  | 66  | 0.695 | 2.128 |       | pact     |  | 0.519       | mpact |       | -0.403        | low_impact    |  |  |
|   |       | tumors        |         |     |                                                |  | 38616 | 16      |      |     |       |       |    |     |       |       |       |          |  |             |       |       |               |               |  |  |
|   | Liver | Private in    |         |     |                                                |  | ENST0 | ENSP00  |      |     |       |       |    |     |       |       |       |          |  |             |       |       |               |               |  |  |
| 7 | metas | metastatic    | 4:10386 | NH  |                                                |  | 00005 | 0004260 | 76   | G/  | gGt/g |       | 0  | 0.9 |       |       |       | high_im  |  | high_impact |       |       |               |               |  |  |
|   | tases | tumor         | 7931    | ED  | Na+/H+ exchanger domain containing 1           |  | 00005 | 0004260 | 76   | D   | At    | -     | 0  | 99  | NA    | 2.383 |       | pact     |  | 1.933       |       | NA    | NA            |               |  |  |
|   |       |               |         | C1  |                                                |  | 14340 | 56      |      |     |       |       |    |     |       |       |       |          |  |             |       |       |               |               |  |  |
|   | Liver | Private in    |         |     |                                                |  | ENST0 | ENSP00  |      |     |       |       |    |     |       |       |       |          |  |             |       |       |               |               |  |  |
| 7 | metas | metastatic    | 19:5656 | NLR |                                                |  | 00003 | 0003750 | 1108 | S/  | tCt/t | rs124 | .  | 0.9 |       |       |       | mediu    |  | high_impact |       |       |               |               |  |  |
|   | tases | tumor         | 9629    | P5  | NLR family, pyrin domain containing 5          |  | 00003 | 0003750 | 1108 | C   | Gt    | 62795 | 0  | 98  | 3.17  | 0.55  |       | m_impact |  | 1.666       |       | 1.881 | medium_impact |               |  |  |
|   |       |               |         |     |                                                |  | 90649 | 63      |      |     |       |       |    | 4   |       |       |       |          |  |             |       |       |               |               |  |  |
|   | Liver | Private in    |         |     |                                                |  | ENST0 | ENSP00  |      |     |       |       |    |     |       |       |       |          |  |             |       |       |               |               |  |  |
| 7 | metas | metastatic    | 4:56502 | NM  | neuromedin U                                   |  | 00005 | 0004242 | 18   | A/  | gCg/  | rs382 | 0  | 0.4 |       |       |       | high_im  |  | medium_i    |       |       |               |               |  |  |
|   | tases | tumor         | 307     | U   |                                                |  | 00005 | 0004242 | 18   | E   | gAg   | 8555  | 0  | 38  | NA    | 2.026 |       | pact     |  | 0.096       | mpact |       | NA            | NA            |  |  |
|   |       |               |         |     |                                                |  | 05262 | 46      |      |     |       |       |    |     |       |       |       |          |  |             |       |       |               |               |  |  |
|   | Prima | Common in     |         |     |                                                |  | ENST0 | ENSP00  |      |     |       |       |    |     |       |       |       |          |  |             |       |       |               |               |  |  |
| 7 | ry    | Primary tumor | 12:5761 | NXP | neurexophilin 4                                |  | 00003 | 0003335 | 186  | L/  | cTt/c |       | 0  | 0.7 |       |       |       | high_im  |  | medium_i    |       |       |               |               |  |  |
|   | tumor | primary tumor | 9160    | H4  |                                                |  | 00003 | 0003335 | 186  | R   | Gt    | -     | 0  | 88  | 0     | 2.064 |       | pact     |  | 0.523       | mpact |       | -1.036        | low_impact    |  |  |
|   |       |               |         |     |                                                |  | 49394 | 93      |      |     |       |       |    |     |       |       |       |          |  |             |       |       |               |               |  |  |
|   | Prima | Private in    |         |     |                                                |  | ENST0 | ENSP00  |      |     |       |       |    |     |       |       |       |          |  |             |       |       |               |               |  |  |
| 7 | ry    | Primary tumor | 5:14059 | PC  | protocadherin beta 13                          |  | 00003 | 0003454 | 20   | L/  | cTt/c |       | 0  | 0.9 |       |       |       | high_im  |  | medium_i    |       |       |               |               |  |  |
|   |       | primary tumor | 3754    | DH  |                                                |  | 00003 | 0003454 | 20   | P   | Ct    | -     | 0  | 18  | 3.38  | 2.075 |       | pact     |  | 0.756       | mpact |       | 2.362         | medium_impact |  |  |

|   |                         |                                   |                  |                 |                                                                 |                |                   |      |         |             |   |   |           |       |            |                 |        |                |        |                   |
|---|-------------------------|-----------------------------------|------------------|-----------------|-----------------------------------------------------------------|----------------|-------------------|------|---------|-------------|---|---|-----------|-------|------------|-----------------|--------|----------------|--------|-------------------|
|   | tumor                   |                                   |                  | B13             |                                                                 | 41948          | 91                |      |         |             |   |   |           |       |            |                 |        |                |        |                   |
| 7 | Prima<br>ry<br>tumor    | Private in<br>primary tumor       | 5:32090<br>332   | PDZ<br>D2       | PDZ domain containing 2                                         | ENST0<br>00003 | ENSP00<br>0003715 | 2061 | E/<br>K | Gag/<br>Aag | - | 0 | 0         | NA    | 2.062      | high_im<br>pact | -1.483 | low_imp<br>ct  | NA     | NA                |
| 7 | Liver<br>metas<br>tases | Private in<br>metastatic<br>tumor | 12:1235<br>19086 | PIT<br>PN<br>M2 | phosphatidylinositol transfer protein,<br>membrane-associated 2 | ENST0<br>00005 | ENSP00<br>0004376 | 18   | R/<br>C | Cgc/<br>Tgc | - | 0 | 0.9<br>99 | NA    | 2.143      | high_im<br>pact | 1.883  | high_imp<br>ct | NA     | NA                |
| 7 | Prima<br>ry<br>tumor    | Private in<br>primary tumor       | 19:4513<br>269   | PLI<br>N4       | perilipin 4                                                     | ENST0<br>00003 | ENSP00<br>0003012 | 221  | K/<br>E | Aaa/<br>Gaa | - | . | 0.9<br>97 | 2.48  | -0.53<br>4 | low_im<br>pact  | 1.512  | high_imp<br>ct | 1.727  | medium_imp<br>act |
| 7 | Liver<br>metas<br>tases | Private in<br>metastatic<br>tumor | 14:3965<br>0823  | PN<br>N         | pinin, desmosome associated protein                             | ENST0<br>00002 | ENSP00<br>0002168 | 637  | G/<br>V | gGc/<br>gTc | - | 0 | 0         | 2.605 | 2.018      | high_im<br>pact | -1.636 | low_imp<br>ct  | 1.309  | medium_imp<br>act |
| 7 | Liver<br>metas<br>tases | Private in<br>metastatic<br>tumor | 21:1498<br>2776  | POT<br>ED       | POTE ankyrin domain family, member D                            | ENST0<br>00002 | ENSP00<br>0002994 | 76   | G/<br>D | gGc/<br>gAc | - | 0 | 0.0<br>82 | NA    | 2.062      | high_im<br>pact | -0.385 | low_imp<br>ct  | NA     | NA                |
| 7 | Liver<br>metas<br>tases | Private in<br>metastatic<br>tumor | 8:12842<br>8284  | PO<br>U5F<br>1B | POU class 5 homeobox 1B                                         | ENST0<br>00003 | ENSP00<br>0003755 | 58   | W/<br>S | tGg/t<br>Cg | - | 0 | 0.0<br>02 | 1.795 | 2.056      | high_im<br>pact | -1.366 | low_imp<br>ct  | 0.719  | low_impact        |
| 7 | Prima<br>ry<br>tumor    | Private in<br>primary tumor       | 3:47452<br>382   | PTP<br>N23      | protein tyrosine phosphatase, non-receptor<br>type 23           | ENST0<br>00002 | ENSP00<br>0002655 | 1032 | G/<br>R | Ggg/<br>Cgg | - | . | 0.9<br>95 | 0.695 | -0.04<br>2 | low_im<br>pact  | 1.602  | high_imp<br>ct | -0.377 | low_impact        |
| 7 | Prima<br>ry<br>tumor    | Private in<br>primary tumor       | 19:5214<br>592   | PTP<br>RS       | protein tyrosine phosphatase, receptor type, S                  | ENST0<br>00005 | ENSP00<br>0004415 | 1087 | R/<br>W | Cgg/<br>Tgg | - | 0 | 0.9<br>97 | NA    | 2.084      | high_im<br>pact | 1.697  | high_imp<br>ct | NA     | NA                |
| 7 | Liver<br>metas<br>tases | Private in<br>metastatic<br>tumor | 17:7709<br>9335  | RBF<br>OX3      | RNA binding protein, fox-1 homolog (C.<br>elegans) 3            | ENST0<br>00003 | ENSP00<br>0003447 | 138  | G/<br>V | gGt/g<br>Tt | - | 0 | 1         | NA    | 2.056      | high_im<br>pact | 1.904  | high_imp<br>ct | NA     | NA                |

|   |                         |                                                  |                 |            |                                                  |                |                   |     |         |             |               |         |           |                  |                 |       |                   |        |                   |
|---|-------------------------|--------------------------------------------------|-----------------|------------|--------------------------------------------------|----------------|-------------------|-----|---------|-------------|---------------|---------|-----------|------------------|-----------------|-------|-------------------|--------|-------------------|
| 7 | Prima<br>ry<br>tumor    | Private in<br>primary tumor                      | 1:24859<br>664  | RC<br>AN3  | RCAN family member 3                             | ENST0<br>00003 | ENSP00<br>0003635 | 154 | P/<br>Q | cCg/<br>cAg | -<br>-        | 0<br>0  | 0.9<br>99 | 3.425<br>1.631   | mediu<br>m_imp  | 1.515 | high_imp<br>ct    | 2.367  | medium_imp<br>act |
| 7 | Prima<br>ry<br>tumor    | Private in<br>primary tumor                      | 11:7310<br>3450 | REL<br>T   | RELT tumor necrosis factor receptor              | ENST0<br>00000 | ENSP00<br>0000647 | 188 | R/<br>W | Cgg/<br>Tgg | -<br>-        | 0<br>0  | 0.9<br>99 | 0.55<br>1.949    | mediu<br>m_imp  | 1.856 | high_imp<br>ct    | -0.49  | low_impact        |
| 7 | Liver<br>metas<br>tases | Private in<br>metastatic<br>tumor                | 10:4359<br>5983 | RET        | ret proto-oncogene                               | ENST0<br>00005 | ENSP00<br>0004459 | 50  | L/<br>F | ttG/tt<br>T | -<br>-        | 0<br>0  | 0.9<br>98 | NA<br>1.236      | mediu<br>m_imp  | 1.733 | high_imp<br>ct    | NA     | NA                |
| 7 | Prima<br>ry<br>tumor    | Private in<br>primary tumor                      | 13:2543<br>3204 | RNF<br>17  | ring finger protein 17                           | ENST0<br>00004 | ENSP00<br>0003888 | 550 | P/<br>T | Cct/A<br>ct | -<br>-        | 1<br>1  | 0.9<br>98 | NA<br>-3.75<br>4 | low_im<br>pact  | 1.581 | high_imp<br>ct    | NA     | NA                |
| 7 | Prima<br>ry<br>tumor    | Common in<br>primary and<br>metastatic<br>tumors | X:38147<br>170  | RP<br>GR   | retinitis pigmentosa GTPase regulator            | ENST0<br>00003 | ENSP00<br>0003222 | 566 | G/<br>E | gGg/<br>gAg | rs180<br>1688 | .<br>3  | 0.9<br>98 | NA<br>1          | low_im<br>pact  | 1.654 | high_imp<br>ct    | NA     | NA                |
| 7 | Liver<br>metas<br>tases | Common in<br>primary and<br>metastatic<br>tumors | X:38147<br>170  | RP<br>GR   | retinitis pigmentosa GTPase regulator            | ENST0<br>00003 | ENSP00<br>0003436 | 566 | G/<br>E | gGg/<br>gAg | rs180<br>1688 | 0<br>98 | 0.9<br>98 | 0.975<br>1.936   | mediu<br>m_imp  | 1.654 | high_imp<br>ct    | -0.036 | low_impact        |
| 7 | Liver<br>metas<br>tases | Private in<br>metastatic<br>tumor                | 19:1440<br>375  | RPS<br>15  | ribosomal protein S15                            | ENST0<br>00002 | ENSP00<br>0002336 | 118 | E/<br>K | Gag/<br>Aag | -<br>-        | 0<br>0  | 0.9<br>69 | 4.395<br>2.159   | high_im<br>pact | 0.998 | medium_i<br>mpact | 2.909  | medium_imp<br>act |
| 7 | Liver<br>metas<br>tases | Private in<br>metastatic<br>tumor                | X:18660<br>135  | RS1        | retinoschisin 1                                  | ENST0<br>00003 | ENSP00<br>0003693 | 222 | K/<br>Q | Aag/<br>Cag | -<br>-        | 0<br>0  | 0.9<br>98 | 1.43<br>1.637    | mediu<br>m_imp  | 1.613 | high_imp<br>ct    | 0.578  | low_impact        |
| 7 | Liver<br>metas          | Private in<br>metastatic                         | 6:11695<br>0734 | RSP<br>H4A | radial spoke head 4 homolog A<br>(Chlamydomonas) | ENST0<br>00003 | ENSP00<br>0003575 | 309 | R/<br>H | cGc/<br>cAc | rs692<br>7567 | 0<br>.  | 0.9<br>99 | NA<br>1.128      | mediu<br>m_imp  | 1.91  | high_imp<br>ct    | NA     | NA                |





|   |       |               |         |     |                                        |       |         |     |    |      |       |     |     |       |       |          |        |          |    |        |            |
|---|-------|---------------|---------|-----|----------------------------------------|-------|---------|-----|----|------|-------|-----|-----|-------|-------|----------|--------|----------|----|--------|------------|
|   | ry    | primary tumor | 2462    | EM5 |                                        | 00002 | 0002612 | S   | ct | .    | 98    |     |     | m_imp |       | ct       |        | act      |    |        |            |
|   | tumor |               |         |     |                                        | 61234 | 34      |     |    |      | 1     |     |     | act   |       |          |        |          |    |        |            |
|   |       |               |         |     |                                        |       |         |     |    |      | 1     |     |     |       |       |          |        |          |    |        |            |
|   |       |               |         |     |                                        |       |         |     |    |      | 0     |     |     | mediu |       |          |        |          |    |        |            |
| 7 | Liver | Private in    | 12:9890 | TM  |                                        | ENST0 | ENSP00  |     |    |      |       |     |     |       |       |          |        |          |    |        |            |
|   | metas | metastatic    | 9833    | PO  | thymopoietin                           | 00003 | 0003402 | 96  | P/ | cCg/ | .     | 0.9 |     |       |       | high_imp |        |          |    |        |            |
|   | tases | tumor         |         |     |                                        | 43315 | 51      |     | R  | cGg  | -     | 0   | 96  | NA    | 0.994 | m_imp    | 1.537  | ct       | NA | NA     |            |
|   |       |               |         |     |                                        |       |         |     |    |      |       | 1   |     |       |       | act      |        |          |    |        |            |
| 7 | Prima | Common in     |         |     |                                        | ENST0 | ENSP00  |     |    |      |       |     |     |       |       | mediu    |        |          |    |        |            |
|   | ry    | primary and   | 21:1094 | TPT | transmembrane phosphatase with tensin  | 00003 | 0003444 | 157 | R/ | cGa/ | rs181 | 0   | 1   | NA    | 1.924 | m_imp    | 1.891  | high_imp |    | NA     | NA         |
|   | tumor | metastatic    | 3003    | E   | homology                               | 42420 | 41      |     | Q  | cAa  | 0856  |     |     |       |       | act      |        | ct       |    |        |            |
|   |       | tumors        |         |     |                                        |       |         |     |    |      |       |     |     |       |       |          |        |          |    |        |            |
| 7 | Liver | Common in     |         |     |                                        | ENST0 | ENSP00  |     |    |      |       |     |     |       |       | mediu    |        |          |    |        |            |
|   | metas | primary and   | 21:1094 | TPT | transmembrane phosphatase with tensin  | 00003 | 0003444 | 157 | R/ | cGa/ | rs181 | 0   | 1   | NA    | 1.924 | m_imp    | 1.891  | high_imp |    | NA     | NA         |
|   | tases | metastatic    | 3003    | E   | homology                               | 42420 | 41      |     | Q  | cAa  | 0856  |     |     |       |       | act      |        | ct       |    |        |            |
|   |       | tumors        |         |     |                                        |       |         |     |    |      |       |     |     |       |       |          |        |          |    |        |            |
| 7 | Prima | Private in    | 1:15655 | TTC |                                        | ENST0 | ENSP00  |     |    |      |       |     |     |       |       | high_im  |        |          |    |        |            |
|   | ry    | primary tumor | 1848    | 24  | tetratricopeptide repeat domain 24     | 00003 | 0003394 | 4   | E/ | gAg/ | rs668 | 0   | 0.2 | NA    | 2.02  | pact     | -0.086 | low_imp  |    | NA     | NA         |
|   | tumor |               |         |     |                                        | 40086 | 87      |     | G  | gGg  | 2716  |     | 05  |       |       |          |        | ct       |    |        |            |
|   |       |               |         |     |                                        |       |         |     |    |      |       | 0   |     |       |       |          |        |          |    |        |            |
| 7 | Liver | Private in    |         |     |                                        | ENST0 | ENSP00  |     |    |      |       |     |     |       |       | mediu    |        |          |    |        |            |
|   | metas | metastatic    | 6:13958 | TXL |                                        | 00003 | 0003512 | 262 | E/ | Gag/ | -     | .   | 0.9 |       |       |          |        |          |    |        |            |
|   | tases | tumor         | 3814    | NB  | taxilin beta                           | 58430 | 06      |     | K  | Aag  |       | 0   | 99  | 2.175 | 0.846 | m_imp    | 1.787  | high_imp |    | 1.394  | medium_imp |
|   |       |               |         |     |                                        |       |         |     |    |      |       | 4   |     |       |       | act      |        | ct       |    |        | act        |
| 7 | Liver | Private in    |         |     |                                        | ENST0 | ENSP00  |     |    |      |       |     |     |       |       | mediu    |        |          |    |        |            |
|   | metas | metastatic    | X:16846 | TXL |                                        | 00003 | 0003812 | 72  | A/ | gCa/ | -     | .   | 0.9 |       |       |          |        |          |    |        |            |
|   | tases | tumor         | 329     | NG  | taxilin gamma                          | 98155 | 22      |     | V  | gTa  |       | 4   |     | NA    | -0.70 | low_im   |        |          |    |        |            |
|   |       |               |         |     |                                        |       |         |     |    |      |       |     | 99  |       | 3     | pact     |        | ct       |    | NA     | NA         |
| 7 | Liver | Private in    |         |     |                                        | ENST0 | ENSP00  |     |    |      |       |     |     |       |       | high_im  |        |          |    |        |            |
|   | metas | metastatic    | 10:1207 | UPF | UPF2 regulator of nonsense transcripts | 00003 | 0003502 | 67  | K/ | aAg/ | -     | 0   | 0   | 0     | 2.02  | pact     | -1.457 | low_imp  |    |        |            |
|   | tases | tumor         | 7223    | 2   | homolog (yeast)                        | 57604 | 21      |     | R  | aGg  |       |     |     |       |       |          |        | ct       |    | -1.112 | low_impact |
|   |       |               |         |     |                                        |       |         |     |    |      |       |     |     |       |       |          |        |          |    |        |            |
| 7 | Prima | Common in     | 16:2310 | USP |                                        | ENST0 | ENSP00  |     |    |      |       |     |     |       |       | high_im  |        |          |    |        |            |
|   | ry    | primary and   | 2027    | 31  | ubiquitin specific peptidase 31        | 00002 | 0002196 | 445 | D/ | Gat/ | rs197 | 0   | 0.8 | 0.85  | 2.021 | pact     | 0.673  | medium_i |    |        |            |
|   |       |               |         |     |                                        |       |         |     | Y  | Tat  | 8066  |     | 73  |       |       |          |        | mpact    |    | -0.104 | low_impact |



|   |       |               |         |     |                                          |       |         |     |    |        |       |   |     |       |       |          |        |               |
|---|-------|---------------|---------|-----|------------------------------------------|-------|---------|-----|----|--------|-------|---|-----|-------|-------|----------|--------|---------------|
|   | tumor | metastatic    |         |     |                                          | 19689 | 89      |     |    |        |       |   |     |       |       |          |        |               |
|   |       | tumors        |         |     |                                          |       |         |     |    |        |       |   |     |       |       |          |        |               |
|   | Liver | Common in     |         |     |                                          | ENST0 | ENSP00  |     |    |        |       |   |     |       |       |          |        |               |
| 7 | metas | primary and   | 16:2310 | USP | ubiquitin specific peptidase 31          | 00002 | 0002196 | 445 | D/ | Gat/   | rs197 | 0 | 0.8 |       |       | high_im  |        |               |
|   | tases | metastatic    | 2027    | 31  |                                          |       |         |     | Y  | Tat    | 8066  | 0 | 73  | 0.85  | 2.021 | pact     | 0.673  | medium_i      |
|   |       | tumors        |         |     |                                          |       |         |     |    |        |       |   |     |       |       |          |        |               |
|   | Prima | Private in    | 9:14045 | WD  | WD repeat domain 85                      | ENST0 | ENSP00  |     | G/ | Ggc/   | -     | 0 | 1   | 3.22  | 2.062 | high_im  |        |               |
| 7 | ry    | primary tumor | 9604    | R85 |                                          | 00002 | 0002775 | 215 | C  | Tgc    | -     | 0 | 1   | 3.22  | 2.062 | pact     | 1.894  | high_impact   |
|   | tumor |               |         |     |                                          |       |         |     |    |        |       |   |     |       |       |          |        |               |
|   | Liver | Private in    |         |     |                                          | ENST0 | ENSP00  |     | F/ | ttT/tt | -     | 0 | 0.9 |       |       | high_im  |        |               |
| 7 | metas | metastatic    | 4:43223 | ZBT | zinc finger and BTB domain containing 49 | 00005 | 0004456 | 27  | L  | G      | -     | 0 | 93  | NA    | 2.064 | pact     | 1.511  | high_impact   |
|   | tases | tumor         | 77      | B49 |                                          |       |         |     |    |        |       |   |     |       |       |          |        |               |
|   | Liver | Private in    |         |     |                                          | ENST0 | ENSP00  |     | R/ | Cgt/T  | -     | 0 | 0.9 |       |       | high_im  |        |               |
| 7 | metas | metastatic    | 8:40683 | ZM  | zinc finger, matrin-type 4               | 00005 | 0004284 | 29  | C  | gt     | -     | 0 | 86  | NA    | 2.084 | pact     | 1.325  | medium_impact |
|   | tases | tumor         | 111     | AT4 |                                          |       |         |     |    |        |       |   |     |       |       |          |        |               |
|   | Liver | Private in    |         |     |                                          | ENST0 | ENSP00  |     | K/ | Aaa/   | rs104 | 0 | 0.0 |       |       | high_im  |        |               |
| 7 | metas | metastatic    | 19:5330 | ZNF | zinc finger protein 28                   | 00003 | 0003756 | 412 | Q  | Caa    | 17163 | 0 | 73  | NA    | 2.084 | pact     | -0.386 | low_impact    |
|   | tases | tumor         | 3705    | 28  |                                          |       |         |     |    |        |       |   |     |       |       |          |        |               |
|   | Prima | Private in    |         |     |                                          | ENST0 | ENSP00  |     |    |        |       | 0 |     |       |       | mediu    |        |               |
| 7 | ry    | primary tumor | 19:5791 | ZNF | zinc finger protein 548                  | 00003 | 0003794 | 315 | G/ | gGg/   | -     | 0 | 93  | 1.225 | 0.43  | m_impact | 1.501  | high_impact   |
|   | tumor |               | 0599    | 548 |                                          |       |         |     | E  | gAg    | -     | 0 | 93  | 1.225 | 0.43  | act      |        | 0.15          |
|   |       |               |         |     |                                          |       |         |     |    |        |       | 6 |     |       |       |          |        |               |
|   | Prima | Common in     |         |     |                                          | ENST0 | ENSP00  |     |    |        |       |   |     |       |       |          |        |               |
| 7 | ry    | primary and   | 9:11677 | ZNF | zinc finger protein 618                  | 00003 | 0003632 | 186 | E/ | gAa/   | -     | 0 | 0.9 |       |       | high_im  |        |               |
|   | tumor | metastatic    | 0636    | 618 |                                          |       |         |     | G  | gGa    | -     | 0 | 04  | NA    | 2.071 | pact     | 0.779  | medium_impact |
|   |       | tumors        |         |     |                                          |       |         |     |    |        |       |   |     |       |       |          |        |               |
|   | Liver | Common in     |         |     |                                          | ENST0 | ENSP00  |     |    |        |       |   |     |       |       |          |        |               |
| 7 | metas | primary and   | 9:11677 | ZNF | zinc finger protein 618                  | 00003 | 0003632 | 186 | E/ | gAa/   | -     | 0 | 0.9 |       |       | high_im  |        |               |
|   | tases | metastatic    | 0636    | 618 |                                          |       |         |     | G  | gGa    | -     | 0 | 04  | NA    | 2.071 | pact     | 0.779  | medium_impact |
|   |       | tumors        |         |     |                                          |       |         |     |    |        |       |   |     |       |       |          |        |               |

|   |                         |                                                  |                 |                  |                                                                    |                |                   |     |         |             |                |         |              |       |                 |                       |                   |                 |                   |                   |
|---|-------------------------|--------------------------------------------------|-----------------|------------------|--------------------------------------------------------------------|----------------|-------------------|-----|---------|-------------|----------------|---------|--------------|-------|-----------------|-----------------------|-------------------|-----------------|-------------------|-------------------|
| 7 | Prima<br>ry<br>tumor    | Private in<br>primary tumor                      | 1:12016<br>8654 | ZNF<br>697       | zinc finger protein 697                                            | ENST0<br>00004 | ENSP00<br>0003968 | 24  | F/<br>V | Ttt/G<br>tt | rs747<br>02216 | 0<br>04 | 0.0<br>0.695 | 2.064 | high_im<br>pact | -1.171                | low_imp<br>act    | -0.311          | low_impact        |                   |
| 7 | Liver<br>metas<br>tases | Private in<br>metastatic<br>tumor                | 16:3054<br>5862 | ZNF<br>747       | zinc finger protein 747                                            | ENST0<br>00002 | ENSP00<br>0002527 | 47  | S/<br>P | Tcc/<br>Ccc | -<br>-         | 0<br>92 | 0.9<br>3.585 | 2.084 | high_im<br>pact | 1.467                 | medium_i<br>mpact | 2.338           | medium_imp<br>act |                   |
| 8 | Prima<br>ry<br>tumor    | Common in<br>primary and<br>metastatic<br>tumors | 2:21712<br>4369 | 417<br>02        | membrane-associated ring finger (C3HC4) 4                          | ENST0<br>00002 | ENSP00<br>0002730 | 300 | R/<br>H | cGc/<br>cAc | -<br>-         | 0<br>0  | 0.9<br>0.97  | 2.095 | 0.691           | mediu<br>m_imp<br>act | 1.772             | high_imp<br>act | 1.22              | medium_imp<br>act |
| 8 | Liver<br>metas<br>tases | Common in<br>primary and<br>metastatic<br>tumors | 2:21712<br>4369 | 417<br>02        | membrane-associated ring finger (C3HC4) 4                          | ENST0<br>00002 | ENSP00<br>0002730 | 300 | R/<br>H | cGc/<br>cAc | -<br>-         | 0<br>0  | 0.9<br>0.97  | 2.095 | 0.691           | mediu<br>m_imp<br>act | 1.772             | high_imp<br>act | 1.22              | medium_imp<br>act |
| 8 | Liver<br>metas<br>tases | Private in<br>metastatic<br>tumor                | 12:4382<br>1125 | ADA<br>MT<br>S20 | ADAM metallopeptidase with thrombospondin<br>type 1 motif, 20      | ENST0<br>00003 | ENSP00<br>0003789 | 483 | G/<br>R | Gga/<br>Aga | -<br>-         | 0<br>0  | 0.0<br>0.62  | NA    | 2.29            | high_im<br>pact       | -0.19             | low_imp<br>act  | NA                | NA                |
| 8 | Liver<br>metas<br>tases | Private in<br>metastatic<br>tumor                | 10:5174<br>8684 | AG<br>AP6        | ArfGAP with GTPase domain, ankyrin repeat<br>and PH domain 6       | ENST0<br>00004 | ENSP00<br>0004009 | 70  | R/<br>Q | cGg/<br>cAg | rs772<br>35195 | 0<br>1  | 0.5<br>1.34  | 2.067 | high_im<br>pact | 0.211                 | medium_i<br>mpact | 0.132           | low_impact        |                   |
| 8 | Liver<br>metas<br>tases | Private in<br>metastatic<br>tumor                | 7:10015<br>1813 | AGF<br>G2        | ArfGAP with FG repeats 2                                           | ENST0<br>00003 | ENSP00<br>0003001 | 228 | D/<br>V | gAc/<br>gTc | -<br>-         | 0<br>0  | 0.9<br>0.96  | 2.215 | 2.067           | high_im<br>pact       | 1.582             | high_imp<br>act | 1.027             | medium_imp<br>act |
| 8 | Prima<br>ry<br>tumor    | Private in<br>primary tumor                      | 2:97505<br>297  | ANK<br>RD2<br>3  | ankyrin repeat domain 23                                           | ENST0<br>00003 | ENSP00<br>0003216 | 303 | T/<br>P | Acc/<br>Ccc | rs748<br>26568 | 0<br>98 | 0.6<br>0.695 | 2.062 | high_im<br>pact | 0.41                  | medium_i<br>mpact | -0.338          | low_impact        |                   |
| 8 | Liver<br>metas<br>tases | Private in<br>metastatic<br>tumor                | 19:3754<br>094  | APB<br>A3        | amyloid beta (A4) precursor protein-binding,<br>family A, member 3 | ENST0<br>00003 | ENSP00<br>0003151 | 258 | G/<br>R | Ggg/<br>Agg | -<br>-         | 0<br>0  | 0.9<br>0.97  | 2.54  | 2.062           | high_im<br>pact       | 1.625             | high_imp<br>act | 1.597             | medium_imp<br>act |
| 8 | Prima                   | Common in                                        | 2:25966         | ASX              | additional sex combs like 2 (Drosophila)                           | ENST0          | ENSP00            | 976 | E/      | gAa/        | -              | 0       | 0.9          | 2.255 | 2.049           | high_im               | 0.982             | medium_i        | 1.122             | medium_imp        |

|   |        |               |         |      |                                                    |       |         |      |     |      |    |   |     |       |       |         |        |             |        |               |
|---|--------|---------------|---------|------|----------------------------------------------------|-------|---------|------|-----|------|----|---|-----|-------|-------|---------|--------|-------------|--------|---------------|
|   | ry     | primary and   | 279     | L2   |                                                    | 00004 | 0003914 | G    | gGa |      | 55 |   |     | pact  |       | mpact   |        | act         |        |               |
|   | tumor  | metastatic    |         |      |                                                    | 35504 | 47      |      |     |      |    |   |     |       |       |         |        |             |        |               |
|   |        | tumors        |         |      |                                                    |       |         |      |     |      |    |   |     |       |       |         |        |             |        |               |
|   | Liver  | Common in     |         |      |                                                    | ENST0 | ENSP00  |      |     |      |    |   |     |       |       |         |        |             |        |               |
| 8 | metas  | primary and   | 2:25966 | ASX  | additional sex combs like 2 (Drosophila)           | 00003 | 0003372 | 948  | E/  | gAa/ | -  | 0 | 0.9 | NA    | 2.049 | high_im | 0.982  | medium_i    | NA     | NA            |
|   | tases  | metastatic    | 279     | L2   |                                                    | 00003 | 0003372 | 948  | G   | gGa  | -  | 0 | 55  |       |       | pact    |        | mpact       |        |               |
|   | tumors |               |         |      |                                                    | 36112 | 50      |      |     |      |    |   |     |       |       |         |        |             |        |               |
| 8 | ry     | Private in    | 2:22008 | ATG  | ATG9 autophagy related 9 homolog A (S. cerevisiae) | 00004 | 0003867 | 838  | K/  | Aag/ | -  | 0 | 0.8 | 0.975 | 2.105 | high_im | 0.777  | medium_i    | -0.449 | low_impact    |
|   | tumor  | primary tumor | 5471    | 9A   |                                                    | 00004 | 0003867 | 838  | E   | Gag  | -  | 0 | 32  |       |       | pact    |        | mpact       |        |               |
|   |        |               |         |      |                                                    | 09618 | 10      |      |     |      |    |   |     |       |       |         |        |             |        |               |
|   | Prima  | Common in     |         |      |                                                    | ENST0 | ENSP00  |      |     |      |    |   |     |       |       |         |        |             |        |               |
| 8 | ry     | primary and   | 17:7941 | BAH  | BAH domain and coiled-coil containing 1            | 00003 | 0003034 | 1398 | K/  | aAg/ | -  | 0 | 0.9 | NA    | 2.084 | high_im | 1.012  | medium_i    | NA     | NA            |
|   | tumor  | metastatic    | 9010    | CC1  |                                                    | 00003 | 0003034 | 1398 | T   | aCg  | -  | 0 | 53  |       |       | pact    |        | mpact       |        |               |
|   |        | tumors        |         |      |                                                    | 07745 | 86      |      |     |      |    |   |     |       |       |         |        |             |        |               |
|   | Liver  | Common in     |         |      |                                                    | ENST0 | ENSP00  |      |     |      |    |   |     |       |       |         |        |             |        |               |
| 8 | metas  | primary and   | 17:7941 | BAH  | BAH domain and coiled-coil containing 1            | 00003 | 0003034 | 1398 | K/  | aAg/ | -  | 0 | 0.9 | NA    | 2.084 | high_im | 1.012  | medium_i    | NA     | NA            |
|   | tases  | metastatic    | 9010    | CC1  |                                                    | 00003 | 0003034 | 1398 | T   | aCg  | -  | 0 | 53  |       |       | pact    |        | mpact       |        |               |
|   | tumors |               |         |      |                                                    | 07745 | 86      |      |     |      |    |   |     |       |       |         |        |             |        |               |
| 8 | ry     | Private in    | 19:1535 | BR   | bromodomain containing 4                           | 00002 | 0002633 | 1046 | P/  | cCc/ | -  | 0 | 0   | 1.355 | 2.064 | high_im | -1.491 | low_impact  | 0.343  | low_impact    |
|   | tumor  | primary tumor | 3743    | D4   |                                                    | 00002 | 0002633 | 1046 | H   | cAc  | -  | 0 | 0   |       |       | pact    |        | mpact       |        |               |
|   |        |               |         |      |                                                    | 63377 | 77      |      |     |      |    |   |     |       |       |         |        |             |        |               |
| 8 | ry     | Private in    | 11:6232 | C11  | chromosome 11 open reading frame 42                | 00003 | 0003210 | 307  | G/  | Ggg/ | -  | 0 | 0.9 | 0.695 | 2.929 | high_im | 0.786  | medium_i    | -0.227 | low_impact    |
|   | tumor  | primary tumor | 189     | orf4 |                                                    | 00003 | 0003210 | 307  | R   | Cgg  | -  | 0 | 48  |       |       | pact    |        | mpact       |        |               |
|   |        |               |         |      |                                                    | 16375 | 21      |      |     |      |    |   |     |       |       |         |        |             |        |               |
| 8 | metas  | Private in    | 12:1126 | C12  | chromosome 12 open reading frame 51                | 00004 | 0004043 | 1972 | G/  | Ggg/ | -  | N | 0.9 | 0.345 | NA    | NA      | 2.019  | high_impact | -0.859 | low_impact    |
|   | tases  | metastatic    | 54894   | orf5 |                                                    | 00004 | 0004043 | 1972 | R   | Cgg  | -  | A | 98  |       |       |         |        | mpact       |        |               |
|   | tumors | tumor         |         |      |                                                    | 30131 | 79      |      |     |      |    |   |     |       |       |         |        |             |        |               |
| 8 | ry     | Private in    | 14:7419 | C14  | chromosome 14 open reading frame 43                | 00004 | 0004077 | 632  | S/I | aGc/ | -  | 0 | 0.9 | 2.545 | 2.064 | high_im | 1.653  | high_impact | 1.528  | medium_impact |
|   | tumor  | primary tumor | 6543    | orf4 |                                                    | 00004 | 0004077 | 632  | S/I | aTc  | -  | 0 | 96  |       |       | pact    |        | mpact       |        |               |
|   |        |               |         |      |                                                    | 23556 | 67      |      |     |      |    |   |     |       |       |         |        |             |        |               |

|   |                         |                                                  |                 |                 |                                                      |                         |                         |      |         |             |                |         |           |                |                       |       |                   |       |                   |
|---|-------------------------|--------------------------------------------------|-----------------|-----------------|------------------------------------------------------|-------------------------|-------------------------|------|---------|-------------|----------------|---------|-----------|----------------|-----------------------|-------|-------------------|-------|-------------------|
| 8 | Prima<br>ry<br>tumor    | Private in<br>primary tumor                      | 7:48081<br>095  | C7o<br>rf57     | chromosome 7 open reading frame 57                   | ENST0<br>00003<br>48904 | ENSP00<br>0003355<br>00 | 74   | A/<br>S | Gcg/<br>Tcg | rs109<br>51942 | 0<br>93 | 0.9<br>93 | 2.32<br>2.929  | high_im<br>pact       | 1.299 | medium_i<br>mpact | 1.552 | medium_imp<br>act |
| 8 | Liver<br>metas<br>tases | Private in<br>metastatic<br>tumor                | 22:3790<br>4603 | CA<br>RD1<br>0  | caspase recruitment domain family, member<br>10      | ENST0<br>00004<br>06271 | ENSP00<br>0003857<br>99 | 46   | R/<br>S | agG/<br>agT | -<br>-         | 0<br>0  | 0.9<br>96 | NA<br>1.136    | mediu<br>m_imp<br>act | 1.779 | high_imp<br>act   | NA    | NA                |
| 8 | Prima<br>ry<br>tumor    | Common in<br>primary and<br>metastatic<br>tumors | 14:9173<br>9666 | CC<br>DC8<br>8C | coiled-coil domain containing 88C                    | ENST0<br>00003<br>89857 | ENSP00<br>0003745<br>07 | 1797 | R/<br>H | cGc/<br>cAc | -<br>-         | 0<br>0  | 0.9<br>97 | 2.045<br>1.141 | mediu<br>m_imp<br>act | 1.709 | high_imp<br>act   | 1.279 | medium_imp<br>act |
| 8 | Liver<br>metas<br>tases | Common in<br>primary and<br>metastatic<br>tumors | 14:9173<br>9666 | CC<br>DC8<br>8C | coiled-coil domain containing 88C                    | ENST0<br>00003<br>34448 | ENSP00<br>0003355<br>93 | 247  | R/<br>H | cGc/<br>cAc | -<br>-         | 0<br>1  | 0.9<br>97 | NA<br>0.002    | mediu<br>m_imp<br>act | 1.709 | high_imp<br>act   | NA    | NA                |
| 8 | Prima<br>ry<br>tumor    | Private in<br>primary tumor                      | 2:73477<br>453  | CCT<br>7        | chaperonin containing TCP1, subunit 7 (eta)          | ENST0<br>00005<br>39919 | ENSP00<br>0004378<br>24 | 320  | C/<br>S | Tgc/<br>Agc | -<br>-         | 0<br>93 | 0.9<br>93 | NA<br>2.124    | high_im<br>pact       | 1.415 | medium_i<br>mpact | NA    | NA                |
| 8 | Prima<br>ry<br>tumor    | Common in<br>primary and<br>metastatic<br>tumors | 22:4234<br>1308 | CE<br>NP<br>M   | centromere protein M                                 | ENST0<br>00004<br>02420 | ENSP00<br>0003841<br>32 | 72   | S/<br>P | Tct/C<br>ct | rs729<br>3091  | 0<br>96 | 0.7<br>96 | NA<br>2.929    | high_im<br>pact       | 0.4   | medium_i<br>mpact | NA    | NA                |
| 8 | Liver<br>metas<br>tases | Common in<br>primary and<br>metastatic<br>tumors | 22:4234<br>1308 | CE<br>NP<br>M   | centromere protein M                                 | ENST0<br>00004<br>02420 | ENSP00<br>0003841<br>32 | 72   | S/<br>P | Tct/C<br>ct | rs729<br>3091  | 0<br>96 | 0.7<br>96 | NA<br>2.929    | high_im<br>pact       | 0.4   | medium_i<br>mpact | NA    | NA                |
| 8 | Prima<br>ry<br>tumor    | Private in<br>primary tumor                      | 2:17561<br>8973 | CH<br>RN<br>A1  | cholinergic receptor, nicotinic, alpha 1<br>(muscle) | ENST0<br>00002<br>61007 | ENSP00<br>0002610<br>07 | 197  | D/<br>N | Gac/<br>Aac | -<br>-         | 0<br>1  | 0.9<br>99 | 1.695<br>1     | low_im<br>pact        | 1.686 | high_imp<br>act   | 0.204 | low_impact        |

|   |                  |                                         |             |           |                                                                                           |            |              |     |     |          |             |     |     |       |       |             |       |               |       |               |
|---|------------------|-----------------------------------------|-------------|-----------|-------------------------------------------------------------------------------------------|------------|--------------|-----|-----|----------|-------------|-----|-----|-------|-------|-------------|-------|---------------|-------|---------------|
| 8 | Liver metastases | Private in metastatic tumor             | 11:66049743 | CNI H2    | cornichon homolog 2 (Drosophila)                                                          | ENST000005 | ENSP0004355  | 32  | D/G | gAt/g Gt | -           | 0   | 0.9 | NA    | 2.064 | high_impact | 0.867 | medium_impact | NA    | NA            |
| 8 | Primary tumor    | Common in primary and metastatic tumors | 17:13980350 | CO X10    | COX10 homolog, cytochrome c oxidase assembly protein, heme A: farnesyltransferase (yeast) | ENST000004 | ENSP00003977 | 120 | R/Q | cGa/cAa  | rs807 7302  | 0   | 0.9 | NA    | 3.121 | high_impact | 2.302 | high_impact   | NA    | NA            |
| 8 | Liver metastases | Common in primary and metastatic tumors | 17:13980350 | CO X10    | COX10 homolog, cytochrome c oxidase assembly protein, heme A: farnesyltransferase (yeast) | ENST000004 | ENSP00003977 | 120 | R/Q | cGa/cAa  | rs807 7302  | 0   | 0.9 | NA    | 3.121 | high_impact | 2.302 | high_impact   | NA    | NA            |
| 8 | Liver metastases | Private in metastatic tumor             | 8:68421768  | CPA 6     | carboxypeptidase A6                                                                       | ENST000005 | ENSP00004311 | 173 | S/C | tCt/Gt   | rs178 53192 | 0   | 0.9 | NA    | 2.042 | high_impact | 1.034 | medium_impact | NA    | NA            |
| 8 | Liver metastases | Private in metastatic tumor             | X:117712522 | DO CK1 1  | dedicator of cytokinesis 11                                                               | ENST000002 | ENSP00002762 | 475 | I/S | aTt/a Gt | -           | 0   | 0.9 | 3.365 | 2.06  | high_impact | 1.123 | medium_impact | 1.853 | medium_impact |
| 8 | Primary tumor    | Common in primary and metastatic tumors | 17:48457722 | EM E1     | essential meiotic endonuclease 1 homolog 1 (S. pombe)                                     | ENST000003 | ENSP00003398 | 466 | A/P | Gct/Cct  | rs773 09724 | . 1 | 0.9 | 2.645 | -0.1  | low_impact  | 1.722 | high_impact   | 1.348 | medium_impact |
| 8 | Liver metastases | Common in primary and metastatic tumors | 17:48457722 | EM E1     | essential meiotic endonuclease 1 homolog 1 (S. pombe)                                     | ENST000005 | ENSP00004255 | 278 | A/P | Gct/Cct  | rs773 09724 | . 0 | 0.9 | NA    | 0.153 | mediuact    | 1.557 | high_impact   | NA    | NA            |
| 8 | Liver metastases | Private in metastatic tumor             | 19:16535987 | EPS 15L 1 | epidermal growth factor receptor pathway substrate 15-like 1                              | ENST000005 | ENSP00004401 | 233 | K/N | aaA/aaC  | -           | . 0 | 0.9 | NA    | 0.103 | mediuact    | 1.762 | high_impact   | NA    | NA            |
| 8 | Primary          | Private in                              | 7:10239     | FA        | family with sequence similarity 185, member                                               | ENST000005 | ENSP00004401 | 179 | G/  | Ggg/     | -           | 0   | 1   | NA    | 2.929 | high_impact | 1.787 | high_impact   | NA    | NA            |



|   |       |               |         |      |                                       |       |         |      |    |       |       |   |     |       |       |  |         |        |          |        |            |
|---|-------|---------------|---------|------|---------------------------------------|-------|---------|------|----|-------|-------|---|-----|-------|-------|--|---------|--------|----------|--------|------------|
|   | ry    | primary tumor | 21      | 1    |                                       | 00003 | 0003052 |      | E  | gAg   |       |   |     | 98    |       |  | pact    |        | ct       |        | act        |
|   | tumor |               |         |      |                                       | 02006 | 44      |      |    |       |       |   |     |       |       |  |         |        |          |        |            |
| 8 | Liver | Private in    | 15:7446 | ISL  | immunoglobulin superfamily containing | ENST0 | ENSP00  |      |    |       |       |   |     |       |       |  | high_im |        | low_imp  |        |            |
|   | metas | metastatic    | 8391    | R    | leucine-rich repeat                   | 00003 | 0003785 | 398  | A/ | Gct/  | -     | 0 | 0   | 0.205 | 2.062 |  | pact    | -1.483 | ct       | -0.852 | low_impact |
|   | tases | tumor         |         |      |                                       | 95118 | 50      |      | T  | Act   |       |   |     |       |       |  |         |        |          |        |            |
| 8 | Liver | Private in    | 12:5282 | KRT  |                                       | ENST0 | ENSP00  |      |    |       |       |   |     |       |       |  | high_im |        | high_imp |        | medium_imp |
|   | metas | metastatic    | 2517    | 75   | keratin 75                            | 00002 | 0002522 | 349  | L/ | cTg/c | -     | 0 | 0.9 | 4.06  | 2.018 |  | pact    | 1.515  | ct       | 2.66   | act        |
|   | tases | tumor         |         |      |                                       | 52245 | 45      |      | Q  | Ag    |       |   | 98  |       |       |  |         |        |          |        |            |
| 8 | Liver | Private in    | 21:4599 | KRT  |                                       | ENST0 | ENSP00  |      |    |       |       |   |     |       |       |  | high_im |        | high_imp |        | medium_imp |
|   | metas | metastatic    | 9880    | AP1  | keratin associated protein 10-5       | 00004 | 0003832 | 192  | C/ | tgC/t | -     | 0 | 0.9 | 2.92  | 2.929 |  | pact    | 1.613  | ct       | 2.209  | act        |
|   | tases | tumor         |         | 0-5  |                                       | 00372 | 23      |      | W  | gG    |       |   | 98  |       |       |  |         |        |          |        |            |
| 8 | Prima | Private in    | 17:3920 | KRT  |                                       | ENST0 | ENSP00  |      |    |       |       |   |     |       |       |  | high_im |        | medium_i |        | medium_imp |
|   | ry    | primary tumor | 3455    | AP2  | keratin associated protein 2-1        | 00003 | 0003752 | 22   | P/ | cCc/  | rs801 | 0 | 0.9 | 2.285 | 2.929 |  | pact    | 1.046  | mpact    | 1.514  | act        |
|   | tumor |               |         | -1   |                                       | 91419 | 38      |      | R  | cGc   | 49678 | 0 | 81  |       |       |  |         |        |          |        |            |
| 8 | Liver | Private in    | 20:4214 | L3M  |                                       | ENST0 | ENSP00  |      |    |       |       |   |     |       |       |  | high_im |        | medium_i |        | NA         |
|   | metas | metastatic    | 3381    | BTL  | l(3)mbt-like 1 (Drosophila)           | 00004 | 0004154 | 54   | P/ | cCg/  | -     | 0 | 0.9 | NA    | 2.037 |  | pact    | 0.991  | mpact    | NA     | NA         |
|   | tases | tumor         |         | 1    |                                       | 57824 | 87      |      | R  | cGg   |       |   | 4   |       |       |  |         |        |          |        |            |
| 8 | Liver | Private in    | 21:1552 | LIPI | lipase, member I                      | ENST0 | ENSP00  |      |    |       |       |   |     |       |       |  | high_im |        | medium_i |        | NA         |
|   | metas | metastatic    | 4921    |      |                                       | 00003 | 0003433 | 385  | G/ | gGa/  | rs743 | 0 | 0.9 | NA    | 2.044 |  | pact    | 1.148  | mpact    | NA     | NA         |
|   | tases | tumor         |         |      |                                       | 44577 | 31      |      | E  | gAa   | 69337 | 0 | 79  |       |       |  |         |        |          |        |            |
| 8 | Liver | Private in    | X:14099 | MA   |                                       | ENST0 | ENSP00  |      |    |       |       |   |     |       |       |  | high_im |        | low_imp  |        | low_impact |
|   | metas | metastatic    | 3690    | GE   | melanoma antigen family C, 1          | 00002 | 0002858 | 167  | V/ | gTg/  | -     | 0 | 0   | 0     | 2.062 |  | pact    | -1.483 | ct       | -1.067 | low_impact |
|   | tases | tumor         |         | C1   |                                       | 85879 | 79      |      | E  | gAg   |       |   |     |       |       |  |         |        |          |        |            |
| 8 | Liver | Private in    | 3:47957 | MA   |                                       | ENST0 | ENSP00  |      |    |       |       |   |     |       |       |  | high_im |        | low_imp  |        | NA         |
|   | metas | metastatic    | 956     | P4   | microtubule-associated protein 4      | 00004 | 0004076 | 471  | P/ | cCg/  | -     | 0 | 0   | NA    | 2.018 |  | pact    | -1.636 | ct       | NA     | NA         |
|   | tases | tumor         |         |      |                                       | 26837 | 02      |      | R  | cGg   |       |   |     |       |       |  |         |        |          |        |            |
| 8 | Prima | Private in    | 6:30672 | MD   | mediator of DNA-damage checkpoint 1   | ENST0 | ENSP00  |      |    |       |       |   |     |       |       |  | high_im |        | medium_i |        | NA         |
|   | ry    | primary tumor | 257     | C1   |                                       | 00003 | 0003655 | 1304 | P/ | cCt/c | -     | 0 | 0.9 | NA    | 2.082 |  | pact    | 0.9    | mpact    | NA     | NA         |
|   | tumor |               |         |      |                                       | 76405 | 87      |      | H  | At    |       |   | 48  |       |       |  |         |        |          |        |            |
| 8 | Prima | Private in    | 6:30672 | MD   | mediator of DNA-damage checkpoint 1   | ENST0 | ENSP00  | 216  | L/ | Ctg/  | -     | 0 | 0   | NA    | 2.082 |  | high_im | -1.654 | low_imp  | NA     | NA         |

|   |        |               |         |     |                                                                                        |       |         |      |     |       |       |   |     |       |       |      |         |        |          |       |             |
|---|--------|---------------|---------|-----|----------------------------------------------------------------------------------------|-------|---------|------|-----|-------|-------|---|-----|-------|-------|------|---------|--------|----------|-------|-------------|
|   | ry     | primary tumor | 257     | C1  |                                                                                        | 00004 | 0004117 |      | M   | Atg   |       |   |     |       |       | pact |         | ct     |          |       |             |
|   |        | tumor         |         |     |                                                                                        | 20817 | 75      |      |     |       |       |   |     |       |       |      |         |        |          |       |             |
| 8 | Liver  | Private in    | 19:4283 | ME  |                                                                                        | ENST0 | ENSP00  |      |     |       |       |   |     |       |       |      | high_im |        | low_imp  |       |             |
|   | metas  | metastatic    | 8217    | GF8 | multiple EGF-like-domains 8                                                            | 00003 | 0003342 | 137  | F/  | tTc/t | -     | 0 | 0.0 | NA    | 2.018 |      | pact    | -0.656 | ct       | NA    | NA          |
|   | tases  | tumor         |         |     |                                                                                        | 34370 | 19      |      | C   | Gc    |       |   |     |       |       |      |         |        |          |       |             |
| 8 | Liver  | Private in    | 18:4870 | ME  |                                                                                        | ENST0 | ENSP00  |      |     |       |       | 0 |     |       |       |      | mediu   |        | high_imp |       |             |
|   | metas  | metastatic    | 3653    | X3C | mex-3 homolog C (C. elegans)                                                           | 00004 | 0003856 | 350  | K/  | Aaa/  | -     | . | 0.9 | 2.9   | 1.126 |      | m_imp   | 1.904  | ct       | 1.872 | medium_imp  |
|   | tases  | tumor         |         |     |                                                                                        | 06189 | 10      |      | Q   | Caa   |       | 0 | 99  |       |       |      | act     |        |          |       | act         |
| 8 | Prima  | Private in    | 11:1234 | MIC |                                                                                        | ENST0 | ENSP00  |      |     |       |       |   |     |       |       |      | mediu   |        | high_imp |       |             |
|   | ry     | primary tumor | 8790    | ALC | MICAL C-terminal like                                                                  | 00002 | 0002561 | 569  | E/  | gAg/  | -     | 0 | 1   | 3.515 | 1.89  |      | m_imp   | 2.063  | ct       | 3.079 | high_impact |
|   | tumor  |               |         | L   |                                                                                        | 56186 | 86      |      | A   | gCg   |       |   |     |       |       |      | act     |        |          |       |             |
| 8 | Liver  | Private in    | 16:5553 | MM  |                                                                                        | ENST0 | ENSP00  |      |     |       |       | 0 |     |       |       |      | mediu   |        | high_imp |       |             |
|   | metas  | metastatic    | 2269    | P2  | matrix metalloproteinase 2 (gelatinase A, 72kDa gelatinase, 72kDa type IV collagenase) | 00005 | 0004441 | 484  | G/  | Gga/  | -     | . | 0.9 | NA    | 0.727 |      | m_imp   | 1.687  | ct       | NA    | NA          |
|   | tases  | tumor         |         |     |                                                                                        | 43485 | 43      |      | R   | Aga   |       | 0 | 98  |       |       |      | act     |        |          |       |             |
| 8 | Liver  | Private in    | 2:95772 | MR  |                                                                                        | ENST0 | ENSP00  |      |     |       |       |   |     |       |       |      | high_im |        | high_imp |       |             |
|   | metas  | metastatic    | 187     | PS5 | mitochondrial ribosomal protein S5                                                     | 00003 | 0003416 | 218  | F/  | tTt/t | -     | 0 | 1   | NA    | 2.159 |      | pact    | 1.861  | ct       | NA    | NA          |
|   | tases  | tumor         |         |     |                                                                                        | 45084 | 60      |      | C   | Gt    |       |   |     |       |       |      |         |        |          |       |             |
| 8 | Liver  | Private in    | 3:19549 | MU  |                                                                                        | ENST0 | ENSP00  |      |     |       |       |   |     |       |       |      | mediu   |        | high_imp |       |             |
|   | metas  | metastatic    | 5916    | C4  | mucin 4, cell surface associated                                                       | 00004 | 0004197 | 4502 | N/  | aaC/  | rs255 | N | 0.9 | NA    | NA    | NA   |         | 1.571  | ct       | NA    | NA          |
|   | tases  | tumor         |         |     |                                                                                        | 78156 | 98      |      | K   | aaG   | 0240  | A | 93  |       |       |      |         |        |          |       |             |
| 8 | Prima  | Private in    | 17:1036 | MY  |                                                                                        | ENST0 | ENSP00  |      |     |       |       |   | 0.9 |       |       |      | mediu   |        | high_imp |       | medium_imp  |
|   | ry     | primary tumor | 2585    | H4  | myosin, heavy chain 4, skeletal muscle                                                 | 00002 | 0002553 | 524  | I/F | Atc/T | -     | 0 | 99  | 3.5   | 1.972 |      | m_imp   | 1.657  | ct       | 1.29  | act         |
|   | tumor  |               |         |     |                                                                                        | 55381 | 81      |      |     | tc    |       |   |     |       |       |      | act     |        |          |       |             |
| 8 | Prima  | Common in     | 19:8613 | MY  |                                                                                        | ENST0 | ENSP00  |      |     |       |       |   |     |       |       |      | mediu   |        | high_imp |       |             |
|   | ry     | primary and   | 137     | O1F | myosin IF                                                                              | 00003 | 0003048 | 434  | G/  | gGc/  | -     | 0 | 0.9 | NA    | 1.879 |      | m_imp   | 1.685  | ct       | NA    | NA          |
|   | tumor  | metastatic    |         |     |                                                                                        | 05795 | 99      |      | D   | gAc   |       |   |     |       |       |      | act     |        |          |       |             |
|   | tumors |               |         |     |                                                                                        |       |         |      |     |       |       |   |     |       |       |      |         |        |          |       |             |
| 8 | Liver  | Common in     | 19:8613 | MY  | myosin IF                                                                              | ENST0 | ENSP00  | 389  | G/  | gGc/  | -     | 0 | 1   | 4.87  | 1.879 |      | mediu   | 1.685  | high_imp | 2.918 | medium_imp  |



|   |                  |                                         |             |                  |                                             |  |                         |                         |      |         |             |                |        |           |       |       |  |               |        |               |        |               |
|---|------------------|-----------------------------------------|-------------|------------------|---------------------------------------------|--|-------------------------|-------------------------|------|---------|-------------|----------------|--------|-----------|-------|-------|--|---------------|--------|---------------|--------|---------------|
|   | metastases       | primary and metastatic tumors           | 137         | O1F              |                                             |  | 00003                   | 0003448                 | D    | gAc     |             |                |        |           |       |       |  | m_impact      |        | act           |        |               |
|   |                  |                                         |             |                  |                                             |  | 38257                   | 71                      |      |         |             |                |        |           |       |       |  | act           |        |               |        |               |
| 8 | Primary tumor    | Common in primary and metastatic tumors | 1:24406636  | MY<br>OM<br>3    | myomesin family, member 3                   |  | ENST0<br>00003<br>30966 | ENSP00<br>0003326<br>70 | 820  | V/<br>G | gTg/<br>gGg | -<br>-         | 0<br>0 | 0.7<br>93 | NA    | 2.062 |  | high_impact   | 0.534  | medium_impact | NA     | NA            |
| 8 | Liver metastases | Common in primary and metastatic tumors | 1:24406636  | MY<br>OM<br>3    | myomesin family, member 3                   |  | ENST0<br>00003<br>74434 | ENSP00<br>0003635<br>57 | 819  | V/<br>G | gTg/<br>gGg | -<br>-         | 0<br>0 | 0.2<br>4  | 1.35  | 2.062 |  | high_impact   | -0.077 | low_impact    | 0.349  | low_impact    |
| 8 | Primary tumor    | Private in primary tumor                | 20:62191616 | NA<br>NA         |                                             |  | ENST0<br>00004<br>27522 | ENSP00<br>0003932<br>57 | 1953 | T/<br>M | aCg/<br>aTg | -<br>-         | 0<br>0 | 1         | NA    | 1.92  |  | medium_impact | 1.762  | high_impact   | NA     | NA            |
| 8 | Liver metastases | Private in metastatic tumor             | 20:62193020 | NA<br>NA         |                                             |  | ENST0<br>00004<br>67148 | ENSP00<br>0004174<br>01 | 2257 | P/<br>Q | cCg/<br>cAg | -<br>-         | 0<br>0 | 0.9<br>99 | 2.265 | 1.92  |  | medium_impact | 1.762  | high_impact   | 1.531  | medium_impact |
| 8 | Liver metastases | Private in metastatic tumor             | 7:45121999  | NA<br>CA<br>D    | NAC alpha domain containing                 |  | ENST0<br>00004<br>90531 | ENSP00<br>0004204<br>77 | 1260 | E/<br>D | gaA/<br>gaC | -<br>-         | 0<br>0 | 0.2<br>17 | 1.04  | 2.929 |  | high_impact   | -0.261 | low_impact    | 0.151  | low_impact    |
| 8 | Liver metastases | Private in metastatic tumor             | 2:152417135 | NEB              | nebulin                                     |  | ENST0<br>00001<br>72853 | ENSP00<br>0001728<br>53 | 4728 | A/<br>T | Gcc/<br>Acc | -<br>-         | 0<br>0 | 0.9<br>84 | 2.705 | 2.154 |  | high_impact   | 0.845  | medium_impact | 1.768  | medium_impact |
| 8 | Primary tumor    | Private in primary tumor                | 9:33466323  | NOL<br>6         | nucleolar protein family 6 (RNA-associated) |  | ENST0<br>00002<br>97990 | ENSP00<br>0002979<br>90 | 731  | Y/<br>C | tAc/t<br>Gc | -<br>-         | 0<br>0 | 0.9<br>96 | 0.97  | 1.126 |  | medium_impact | 1.563  | high_impact   | -0.126 | low_impact    |
| 8 | Primary tumor    | Private in primary tumor                | 1:145281613 | NO<br>TCH<br>2NL | notch 2 N-terminal like                     |  | ENST0<br>00003<br>62074 | ENSP00<br>0003549<br>29 | 181  | S/<br>R | agC/<br>agA | rs121<br>20756 | 0<br>1 | 0.9<br>98 | 1.275 | 0.158 |  | medium_impact | 1.671  | high_impact   | 0.236  | low_impact    |



|   |       |               |         |     |       |         |      |    |       |       |   |     |       |       |         |        |               |        |               |
|---|-------|---------------|---------|-----|-------|---------|------|----|-------|-------|---|-----|-------|-------|---------|--------|---------------|--------|---------------|
|   | tumor | metastatic    |         |     | 62901 | 01      |      |    |       |       |   |     |       |       |         |        |               |        |               |
|   |       | tumors        |         |     |       |         |      |    |       |       |   |     |       |       |         |        |               |        |               |
|   | Liver | Common in     |         |     | ENST0 | ENSP00  |      |    |       |       |   |     |       |       |         |        |               |        |               |
| 8 | metas | primary and   | 6:10086 | SIM | 00002 | 0002629 | 383  | R/ | Agg/  | -     | 0 | 0.9 | 0.975 | 2.056 | high_im | 1.656  | high_impact   | -0.091 | low_impact    |
|   | tases | metastatic    | 8686    | 1   | 62901 | 01      |      | G  | Ggg   |       |   |     |       |       | pact    |        | ct            |        |               |
|   |       | tumors        |         |     |       |         |      |    |       |       |   |     |       |       |         |        |               |        |               |
|   | Prima | Private in    | 1:15393 | SLC | ENST0 | ENSP00  |      |    |       |       |   |     |       |       |         |        |               |        |               |
| 8 | ry    | primary tumor | 4772    | 39A | 00003 | 0003576 | 81   | L/ | tTg/t | -     | 0 | 1   | 2.725 | 2.016 | high_im | 2.084  | high_impact   | 2.036  | medium_impact |
|   | tumor | primary tumor |         | 1   | 68623 | 12      |      | W  | Gg    |       |   |     |       |       | pact    |        | ct            |        | act           |
|   | Liver | Private in    |         | SLI | ENST0 | ENSP00  |      |    |       |       |   |     |       |       |         |        |               |        |               |
| 8 | metas | metastatic    | X:14271 | TRK | 00003 | 0003494 | 562  | T/ | aCg/  | -     | 0 | 0.1 | 1.545 | 2.062 | high_im | -0.174 | low_impact    | 0.553  | low_impact    |
|   | tases | tumor         | 7240    | 4   | 56928 | 00      |      | M  | aTg   |       |   |     |       |       | pact    |        | ct            |        |               |
|   | Liver | Private in    |         | SP1 | ENST0 | ENSP00  |      |    |       |       |   |     |       |       |         |        |               |        |               |
| 8 | metas | metastatic    | 2:23103 | SP1 | 00003 | 0003514 | 601  | P/ | Cct/T | -     | 0 | 0.7 | 2.485 | 2.119 | high_im | 0.424  | medium_impact | 1.276  | medium_impact |
|   | tases | tumor         | 6796    | 10  | 58662 | 88      |      | S  | ct    |       |   |     |       |       | pact    |        | mpact         |        | act           |
|   | Liver | Private in    |         | SSC | ENST0 | ENSP00  |      |    |       |       |   |     |       |       |         |        |               |        |               |
| 8 | metas | metastatic    | 19:5602 | SSC | 00003 | 0003742 | 1393 | P/ | Ccc/  | -     | 0 | 0   | 0.205 | 2.091 | high_im | -1.824 | low_impact    | -0.7   | low_impact    |
|   | tases | tumor         | 9820    | 5D  | 89623 | 74      |      | S  | Tcc   |       |   |     |       |       | pact    |        | ct            |        |               |
|   | Liver | Private in    |         | SSC | ENST0 | ENSP00  |      |    |       |       |   |     |       |       |         |        |               |        |               |
| 8 | metas | metastatic    | 19:5600 | SSC | 00005 | 0004443 | 355  | G/ | Ggg/  | -     | . | 1   | NA    | -0.21 | low_im  | 1.885  | high_impact   | NA     | NA            |
|   | tases | tumor         | 5129    | 5D  | 41230 | 30      |      | R  | Agg   |       |   |     |       |       | pact    |        | ct            |        |               |
|   |       | tumors        |         |     |       |         |      |    |       |       |   |     |       |       |         |        |               |        |               |
|   | Liver | Private in    |         | ST5 | ENST0 | ENSP00  |      |    |       |       |   |     |       |       |         |        |               |        |               |
| 8 | metas | metastatic    | 11:8747 | ST5 | 00004 | 0003974 | 64   | D/ | gaT/  | -     | 0 | 0.9 | NA    | 2.062 | high_im | 1.417  | medium_impact | NA     | NA            |
|   | tases | tumor         | 735     |     | 47053 | 00      |      | E  | gaG   |       |   |     |       |       | pact    |        | mpact         |        |               |
|   | Prima | Common in     |         |     | ENST0 | ENSP00  |      |    |       |       |   |     |       |       |         |        |               |        |               |
| 8 | ry    | primary and   | 3:52558 | STA | 00004 | 0004184 | 113  | M/ | aTg/  | rs133 | . | 0.9 | NA    | -2.04 | low_im  | 1.55   | high_impact   | NA     | NA            |
|   | tumor | metastatic    | 008     | B1  | 69989 | 26      |      | T  | aCg   | 03    | 9 | 98  |       |       | pact    |        | ct            |        |               |
|   |       | tumors        |         |     |       |         |      |    |       |       |   |     |       |       |         |        |               |        |               |
| 8 | Liver | Common in     | 3:52558 | STA | ENST0 | ENSP00  | 113  | M/ | aTg/  | rs133 | 0 | 0.9 | NA    | -2.04 | low_im  | 1.55   | high_impact   | NA     | NA            |

|   |               |                                         |         |        |                                                                              |           |              |     |    |       |      |   |    |     |       |       |              |       |               |       |               |
|---|---------------|-----------------------------------------|---------|--------|------------------------------------------------------------------------------|-----------|--------------|-----|----|-------|------|---|----|-----|-------|-------|--------------|-------|---------------|-------|---------------|
|   | metastases    | primary and metastatic tumors           | 008     | B1     |                                                                              | 00004     | 0004184      |     | T  | aCg   | 03   | . | 98 |     | 9     | pact  |              | ct    |               |       |               |
|   |               |                                         |         |        |                                                                              | 69989     | 26           |     |    |       |      |   | 9  |     |       |       |              |       |               |       |               |
|   |               |                                         |         |        |                                                                              |           |              |     |    |       |      |   | 6  |     |       |       |              |       |               |       |               |
| 8 | Primary tumor | Private in primary tumor                | 2:19184 | STA    | signal transducer and activator of transcription 1, 91kDa                    | ENST00003 | ENSP00003761 | 605 | E/ | gAg/  |      |   | 0  | 0.9 | 2.8   | 2.119 | high_impact  | 1.856 | high_impact   | 1.581 | medium_impact |
|   |               |                                         | 3641    | T1     |                                                                              | 92322     | 36           |     | G  | gGg   |      |   | -  | 99  |       |       | pact         |       | ct            |       | act           |
| 8 | Primary tumor | Private in primary tumor                | 19:1611 | TCF3   | transcription factor 3 (E2A immunoglobulin enhancer binding factors E12/E47) | ENST00004 | ENSP00003963 | 616 | K/ | Aaa/  |      |   | 0  | 0.9 | NA    | 3.104 | high_impact  | 1.602 | high_impact   | NA    | NA            |
|   |               |                                         | 816     | 3      |                                                                              | 53954     | 63           |     | E  | Gaa   |      |   | -  | 97  |       |       | pact         |       | ct            |       |               |
| 8 | metastases    | Private in metastatic tumor             | 1:21852 | TGFβ2  | transforming growth factor, beta 2                                           | ENST00003 | ENSP00003558 | 1   | M/ | atG/a |      |   | 0  | 0.3 | NA    | 2.135 | high_impact  | 0.029 | medium_impact | NA    | NA            |
|   |               |                                         | 0046    | B2     |                                                                              | 66930     | 97           |     | I  | tA    |      |   | -  | 66  |       |       | pact         |       | mpact         |       |               |
| 8 | metastases    | Private in metastatic tumor             | 15:3988 | THBS1  | thrombospondin 1                                                             | ENST00002 | ENSP00002603 | 471 | G/ | Ggg/  |      |   | 0  | 1   | 3.465 | 1.712 | m_impact     | 1.973 | high_impact   | 4.684 | high_impact   |
|   |               |                                         | 0359    | S1     |                                                                              | 60356     | 56           |     | R  | Agg   |      |   | -  |     |       |       | act          |       | ct            |       |               |
| 8 | Primary tumor | Common in primary and metastatic tumors | 17:7578 | TP53   | tumor protein p53                                                            | ENST00005 | ENSP00004238 | 42  | C/ | tGc/t | COS  |   | 0  | 0.9 | NA    | 2.265 | high_impact  | 1.98  | high_impact   | NA    | NA            |
|   |               |                                         | 526     | 3      |                                                                              | 14944     | 62           |     | F  | Tc    | M106 |   | 47 | 98  |       |       | pact         |       | ct            |       |               |
| 8 | metastases    | Common in primary and metastatic tumors | 17:7578 | TP53   | tumor protein p53                                                            | ENST00003 | ENSP00003797 | 124 | C/ | tGc/t | COS  |   | 0  | 1   | NA    | 2.265 | high_impact  | 2.147 | high_impact   | NA    | NA            |
|   |               |                                         | 526     | 3      |                                                                              | 96473     | 35           |     | F  | Tc    | M106 |   | 47 |     |       |       | pact         |       | ct            |       |               |
| 8 | metastases    | Private in metastatic tumor             | 16:1272 | TPSG1  | tryptase gamma 1                                                             | ENST00002 | ENSP00002347 | 225 | P/ | cCt/c |      |   | 0  | 0.9 | 4.69  | 2.111 | high_impact  | 1.559 | high_impact   | 3.683 | high_impact   |
|   |               |                                         | 080     | G1     |                                                                              | 34798     | 98           |     | R  | Gt    |      |   | -  | 97  |       |       | pact         |       | ct            |       |               |
| 8 | metastases    | Private in metastatic tumor             | 1:11497 | TRIM33 | tripartite motif containing 33                                               | ENST00004 | ENSP00004023 | 120 | Q/ | Cag/  |      |   | 0  | 0.9 | NA    | 1.262 | mediu_impact | 2.195 | high_impact   | NA    | NA            |
|   |               |                                         | 3428    | M33    |                                                                              | 48034     | 33           |     | K  | Aag   |      |   | -  | 96  |       |       | act          |       | ct            |       |               |
|   |               |                                         |         |        |                                                                              |           |              |     |    |       |      |   | 0  |     |       |       |              |       |               |       |               |
|   |               |                                         |         |        |                                                                              |           |              |     |    |       |      |   | 2  |     |       |       |              |       |               |       |               |

|   |                  |                                         |             |                |                                                                        |           |              |      |         |             |               |   |           |       |            |                       |       |                   |       |               |
|---|------------------|-----------------------------------------|-------------|----------------|------------------------------------------------------------------------|-----------|--------------|------|---------|-------------|---------------|---|-----------|-------|------------|-----------------------|-------|-------------------|-------|---------------|
| 8 | Liver metastases | Private in metastatic tumor             | 22:38121795 | TRI<br>OB<br>P | TRIO and F-actin binding protein                                       | ENST00004 | ENSP00004152 | 1078 | R/<br>C | Cgc/<br>Tgc | -             | 0 | 1         | NA    | 1.948      | mediu<br>m_imp<br>act | 1.56  | high_impact       | NA    | NA            |
| 8 | Primary tumor    | Common in primary and metastatic tumors | 11:76507282 | TSK<br>U       | tsukushi small leucine rich proteoglycan homolog (Xenopus laevis)      | ENST00003 | ENSP00003326 | 208  | R/<br>C | Cgc/<br>Tgc | rs374<br>0772 | 0 | 1         | 2.185 | 2.062      | high_im<br>pact       | 1.894 | high_impact       | 1.225 | medium_impact |
| 8 | Liver metastases | Common in primary and metastatic tumors | 11:76507282 | TSK<br>U       | tsukushi small leucine rich proteoglycan homolog (Xenopus laevis)      | ENST00004 | ENSP00003878 | 176  | R/<br>C | Cgc/<br>Tgc | rs374<br>0772 | 0 | 0.9<br>79 | NA    | 2.062      | high_im<br>pact       | 1.145 | medium_i<br>mpact | NA    | NA            |
| 8 | Primary tumor    | Private in primary tumor                | 1:215847574 | US<br>H2A      | Usher syndrome 2A (autosomal recessive, mild)                          | ENST00003 | ENSP00003059 | 4560 | G/<br>D | gGt/g<br>At | -             | 0 | 1         | 3.395 | 2.197      | high_im<br>pact       | 1.708 | high_impact       | 3.646 | high_impact   |
| 8 | Primary tumor    | Private in primary tumor                | 19:44056412 | XR<br>CC1      | X-ray repair complementing defective repair in Chinese hamster cells 1 | ENST00005 | ENSP00004436 | 249  | R/<br>H | cGt/c<br>At | rs254<br>89   | 0 | 0.9<br>1  | NA    | -0.11<br>4 | low_im<br>pact        | 1.515 | high_impact       | NA    | NA            |
| 8 | Primary tumor    | Private in primary tumor                | 14:24002614 | ZFH<br>X2      | zinc finger homeobox 2                                                 | ENST00004 | ENSP00004134 | 641  | G/<br>R | Ggg/<br>Cgg | -             | 0 | 0         | 1.525 | 2.056      | high_im<br>pact       | -1.54 | low_impact        | 0.453 | low_impact    |
| 8 | Liver metastases | Private in metastatic tumor             | 11:64852613 | ZFP<br>L1      | zinc finger protein-like 1                                             | ENST00005 | ENSP00004325 | 37   | W/<br>C | tgG/t<br>gC | -             | 0 | 1         | NA    | 2.064      | high_im<br>pact       | 2.005 | high_impact       | NA    | NA            |
| 8 | Liver metastases | Private in metastatic tumor             | 19:58118393 | ZNF<br>530     | zinc finger protein 530                                                | ENST00003 | ENSP00003328 | 500  | F/<br>L | ttT/tt<br>A | -             | 0 | 0.9<br>55 | 3.025 | 2.084      | high_im<br>pact       | 1.023 | medium_i<br>mpact | 1.819 | medium_impact |
| 8 | Liver metastases | Private in metastatic tumor             | 20:57828953 | ZNF<br>831     | zinc finger protein 831                                                | ENST00003 | ENSP00003600 | 1397 | D/<br>Y | Gat/<br>Tat | -             | 0 | 0.4<br>7  | 1.24  | 2.084      | high_im<br>pact       | 0.224 | medium_i<br>mpact | 0.164 | low_impact    |

|   |                  |                                         |             |        |                                                 |                |                |     |     |         |            |   |       |       |        |               |       |               |        |               |
|---|------------------|-----------------------------------------|-------------|--------|-------------------------------------------------|----------------|----------------|-----|-----|---------|------------|---|-------|-------|--------|---------------|-------|---------------|--------|---------------|
| 8 | Liver metastases | Private in metastatic tumor             | 19:20215097 | ZNF90  | zinc finger protein 90                          | ENST0000418063 | ENSP0000410466 | 18  | W/S | tGg/Cg  | -          | 0 | 0.999 | 4.72  | 2.066  | high_impact   | 1.96  | high_impact   | 3.994  | high_impact   |
| 9 | Liver metastases | Private in metastatic tumor             | 1:6445639   | ACOT7  | acyl-CoA thioesterase 7                         | ENST0000377855 | ENSP0000367086 | 30  | G/W | Ggg/Tgg | -          | 0 | 0.717 | 1.39  | 3.041  | high_impact   | 1.335 | medium_impact | 0.619  | low_impact    |
| 9 | Primary tumor    | Private in primary tumor                | 7:100246370 | ACTL6B | actin-like 6B                                   | ENST0000160382 | ENSP0000160382 | 182 | G/S | Ggc/Agc | -          | 0 | 0.795 | 3.21  | 2.111  | high_impact   | 0.51  | medium_impact | 2.318  | medium_impact |
| 9 | Primary tumor    | Common in primary and metastatic tumors | 1:236902815 | ACTN2  | actinin, alpha 2                                | ENST0000545611 | ENSP0000443955 | 133 | E/K | Gag/Aag | -          | 0 | 0.972 | NA    | 2.661  | high_impact   | 1.269 | medium_impact | NA     | NA            |
| 9 | Liver metastases | Common in primary and metastatic tumors | 1:236902815 | ACTN2  | actinin, alpha 2                                | ENST0000366578 | ENSP0000355537 | 364 | E/K | Gag/Aag | -          | 0 | 0.371 | 3.365 | 2.661  | high_impact   | 0.352 | medium_impact | 1.65   | medium_impact |
| 9 | Primary tumor    | Private in primary tumor                | 5:156908936 | ADAM19 | ADAM metallopeptidase domain 19                 | ENST0000517374 | ENSP0000431027 | 427 | R/W | Cgg/Tgg | -          | 0 | 0.997 | NA    | 0.727  | medium_impact | 1.592 | high_impact   | NA     | NA            |
| 9 | Primary tumor    | Private in primary tumor                | 4:100052734 | ADH4   | alcohol dehydrogenase 4 (class II), polypeptide | ENST0000505590 | ENSP0000425416 | 274 | P/L | cCg/cTg | -          | 0 | 0.999 | NA    | 1.55   | medium_impact | 2.679 | high_impact   | NA     | NA            |
| 9 | Primary tumor    | Private in primary tumor                | 1:27878560  | AHDC1  | AT hook, DNA binding motif, containing 1        | ENST0000247087 | ENSP0000247087 | 23  | R/G | Cgg/Ggg | -          | 0 | 0.861 | 0.345 | 2.064  | high_impact   | 0.718 | medium_impact | -0.662 | low_impact    |
| 9 | Primary tumor    | Common in primary and metastatic        | 1:26663362  | AIM1L  | absent in melanoma 1-like                       | ENST0000429942 | ENSP0000409834 | 187 | S/N | aGc/aAc | rs10751735 | 0 | 0.999 | NA    | -0.419 | low_impact    | 1.879 | high_impact   | NA     | NA            |



|   |                  |                                         |                  |                  |                                                           |                         |                         |      |         |             |   |   |           |       |            |                   |        |               |        |               |
|---|------------------|-----------------------------------------|------------------|------------------|-----------------------------------------------------------|-------------------------|-------------------------|------|---------|-------------|---|---|-----------|-------|------------|-------------------|--------|---------------|--------|---------------|
| 9 | Liver metastases | Private in metastatic tumor             | 2:22008<br>5471  | ATG<br>9A        | ATG9 autophagy related 9 homolog A (S. cerevisiae)        | ENST0<br>00003<br>96761 | ENSP00<br>0003799<br>83 | 838  | K/<br>E | Aag/<br>Gag | - | 0 | 0.8<br>32 | 0.975 | 2.105      | high_impact       | 0.777  | medium_impact | -0.449 | low_impact    |
| 9 | Liver metastases | Private in metastatic tumor             | X:76939<br>771   | ATR<br>X         | alpha thalassemia/mental retardation syndrome X-linked    | ENST0<br>00004<br>00862 | ENSP00<br>0003836<br>59 | 282  | G/<br>A | gGa/<br>gCa | - | 0 | 0.9<br>93 | NA    | 0.708      | mediu<br>m_impact | 2.172  | high_impact   | NA     | NA            |
| 9 | Primary tumor    | Common in primary and metastatic tumors | 17:4724<br>6064  | B4G<br>ALN<br>T2 | beta-1,4-N-acetyl-galactosaminyl transferase 2            | ENST0<br>00003<br>00404 | ENSP00<br>0003004<br>04 | 433  | N/<br>Y | Aat/T<br>at | - | 1 | 0.9<br>98 | 2.135 | -3.11<br>4 | low_impact        | 1.665  | high_impact   | 1.106  | medium_impact |
| 9 | Liver metastases | Common in primary and metastatic tumors | 17:4724<br>6064  | B4G<br>ALN<br>T2 | beta-1,4-N-acetyl-galactosaminyl transferase 2            | ENST0<br>00005<br>04681 | ENSP00<br>0004255<br>10 | 347  | N/<br>Y | Aat/T<br>at | - | 1 | 0.9<br>98 | NA    | -3.11<br>4 | low_impact        | 1.665  | high_impact   | NA     | NA            |
| 9 | Primary tumor    | Private in primary tumor                | 1:16934<br>6168  | BLZ<br>F1        | basic leucine zipper nuclear factor 1                     | ENST0<br>00003<br>67808 | ENSP00<br>0003567<br>82 | 140  | L/<br>S | tTa/t<br>Ca | - | 0 | 0.9<br>99 | 2.36  | 2.066      | high_impact       | 1.96   | high_impact   | 1.46   | medium_impact |
| 9 | Primary tumor    | Private in primary tumor                | 10:1249<br>21806 | BUB<br>3         | budding uninhibited by benzimidazoles 3 homolog (yeast)   | ENST0<br>00004<br>07911 | ENSP00<br>0003839<br>41 | 211  | S/<br>G | Agc/<br>Ggc | - | 0 | 0.0<br>67 | 2.66  | 2.062      | high_impact       | -0.439 | low_impact    | 1.723  | medium_impact |
| 9 | Primary tumor    | Private in primary tumor                | 10:1249<br>21801 | BUB<br>3         | budding uninhibited by benzimidazoles 3 homolog (yeast)   | ENST0<br>00005<br>38238 | ENSP00<br>0004443<br>54 | 129  | D/<br>G | gAc/<br>gGc | - | 0 | 0.2<br>91 | NA    | 2.062      | high_impact       | -0.012 | low_impact    | NA     | NA            |
| 9 | Primary tumor    | Private in primary tumor                | 17:5638<br>6455  | BZR<br>AP1       | benzodiazapine receptor (peripheral) associated protein 1 | ENST0<br>00002<br>68893 | ENSP00<br>0002688<br>93 | 1333 | L/<br>Q | cTg/c<br>Ag | - | 0 | 0.9<br>96 | NA    | 2.23       | high_impact       | 1.225  | medium_impact | NA     | NA            |
| 9 | Liver metastases | Private in metastatic tumor             | 11:1019<br>37378 | C11<br>orf7<br>0 | chromosome 11 open reading frame 70                       | ENST0<br>00005<br>29204 | ENSP00<br>0004323<br>22 | 36   | R/<br>Q | cGa/<br>cAa | - | 0 | 0         | NA    | 2.929      | high_impact       | -1.667 | low_impact    | NA     | NA            |



|   |                  |                                         |             |         |                                                              |               |               |      |     |         |            |   |     |       |       |             |        |               |        |               |
|---|------------------|-----------------------------------------|-------------|---------|--------------------------------------------------------------|---------------|---------------|------|-----|---------|------------|---|-----|-------|-------|-------------|--------|---------------|--------|---------------|
| 9 | Liver metastases | Private in metastatic tumor             | 19:2280885  | C19orf3 | chromosome 19 open reading frame 35                          | ENST000003451 | ENSP000003451 | 16   | P/S | Ccc/Tcc | rs55662626 | 0 | 0.7 | 1.79  | 2.929 | high_impact | 0.397  | medium_impact | 0.972  | low_impact    |
| 9 | Liver metastases | Private in metastatic tumor             | 3:143691196 | C3orf58 | chromosome 3 open reading frame 58                           | ENST000003200 | ENSP000003200 | 8    | K/Q | Aag/Cag | -          | 0 | 0   | 0.805 | 2.929 | high_impact | -1.667 | low_impact    | -0.106 | low_impact    |
| 9 | Liver metastases | Private in metastatic tumor             | 6:54054686  | C6orf14 | chromosome 6 open reading frame 142                          | ENST000003599 | ENSP000003599 | 164  | S/T | Tct/A   | rs6934690  | 0 | 0.0 | NA    | 2.929 | high_impact | -0.661 | low_impact    | NA     | NA            |
| 9 | Primary tumor    | Private in primary tumor                | 9:140173940 | C9orf16 | chromosome 9 open reading frame 167                          | ENST000003501 | ENSP000003501 | 267  | D/N | Gac/Aac | -          | 0 | 0.0 | NA    | 2.011 | high_impact | -0.401 | low_impact    | NA     | NA            |
| 9 | Primary tumor    | Private in primary tumor                | X:49067085  | CA1F    | calcium channel, voltage-dependent, L type, alpha 1F subunit | ENST000003654 | ENSP000003654 | 1495 | F/V | Ttt/G   | -          | 0 | 0.9 | 2.93  | 2.318 | high_impact | 0.926  | medium_impact | 2.581  | medium_impact |
| 9 | Primary tumor    | Private in primary tumor                | 9:69256833  | CBWD6   | COBW domain containing 6                                     | ENST000003666 | ENSP000003666 | 100  | W/R | Tgg/Cgg | rs11340757 | 0 | 0.8 | NA    | 2.015 | high_impact | 0.649  | medium_impact | NA     | NA            |
| 9 | Primary tumor    | Private in primary tumor                | 7:92979250  | CCDC132 | coiled-coil domain containing 132                            | ENST000003076 | ENSP000003076 | 790  | D/H | Gat/Cat | -          | 0 | 0.9 | 1.09  | 2.929 | high_impact | 1.209  | medium_impact | 0.206  | low_impact    |
| 9 | Primary tumor    | Common in primary and metastatic tumors | 10:61552692 | CCDC6   | coiled-coil domain containing 6                              | ENST000002631 | ENSP000002631 | 470  | P/T | Ccc/Acc | rs1053266  | 0 | 0   | 1.39  | 2.111 | high_impact | -1.545 | low_impact    | 0.331  | low_impact    |
| 9 | Liver metastases | Common in primary and metastatic tumors | 10:61552692 | CCDC6   | coiled-coil domain containing 6                              | ENST000002631 | ENSP000002631 | 470  | P/T | Ccc/Acc | rs1053266  | 0 | 0   | 1.39  | 2.111 | high_impact | -1.545 | low_impact    | 0.331  | low_impact    |
| 9 | Primary tumor    | Common in                               | 5:10254     | CCT     | chaperonin containing TCP1, subunit 5                        | ENST000003000 | ENSP000003000 | 75   | A/  | Gcc/    | -          | 0 | 0.9 | 4.57  | 2.124 | high_impact | 1.9    | high_impact   | 3.065  | high_impact   |

|   |       |               |         |     |                                             |  |       |         |     |     |        |       |    |     |         |       |          |        |          |       |            |
|---|-------|---------------|---------|-----|---------------------------------------------|--|-------|---------|-----|-----|--------|-------|----|-----|---------|-------|----------|--------|----------|-------|------------|
|   | ry    | primary and   | 842     | 5   | (epsilon)                                   |  | 00002 | 0002803 | T   | Acc |        |       | 99 |     | pact    |       | ct       |        |          |       |            |
|   | tumor | metastatic    |         |     |                                             |  | 80326 | 26      |     |     |        |       |    |     |         |       |          |        |          |       |            |
|   |       | tumors        |         |     |                                             |  |       |         |     |     |        |       |    |     |         |       |          |        |          |       |            |
|   |       | Common in     |         |     |                                             |  |       |         |     |     |        |       |    |     |         |       |          |        |          |       |            |
| 9 | Liver | primary and   | 5:10254 | CCT | chaperonin containing TCP1, subunit 5       |  | ENST0 | ENSP00  |     |     |        |       |    |     | high_im |       | medium_i |        |          |       |            |
|   | metas | metastatic    | 842     | 5   | (epsilon)                                   |  | 00005 | 0004233 | 54  | A/  | Gcc/   | -     | 0  | 0.9 | NA      | 2.124 | pact     | 1.223  | mpact    | NA    | NA         |
|   | tases | tumors        |         |     |                                             |  | 03026 | 18      |     | T   | Acc    |       |    |     |         |       |          |        |          |       |            |
| 9 | Liver | Private in    | 19:8367 | CD3 |                                             |  | ENST0 | ENSP00  |     |     |        |       |    |     |         |       |          |        |          |       |            |
|   | metas | metastatic    | 709     | 20  | CD320 molecule                              |  | 00005 | 0004376 | 178 | G/  | Gga/   | rs233 | 0  | 0.9 | NA      | 2.1   | high_im  | 1.132  | medium_i | NA    | NA         |
|   | tases | tumor         |         |     |                                             |  | 37716 | 97      |     | R   | Aga    | 6573  |    |     |         |       | pact     |        | mpact    |       |            |
|   |       | Common in     |         |     |                                             |  |       |         |     |     |        |       | 0  |     |         |       |          |        |          |       |            |
| 9 | Prima | primary and   | 10:7343 | CD  |                                             |  | ENST0 | ENSP00  |     |     |        |       |    |     |         |       | mediu    |        | high_imp |       |            |
|   | ry    | metastatic    | 4888    | H23 | cadherin-related 23                         |  | 00003 | 0003818 | 495 | G/  | gGc/   | rs122 | .  | 0.9 | NA      | 0.875 | m_imp    | 1.573  | act      | NA    | NA         |
|   | tumor | tumors        |         |     |                                             |  | 98860 | 36      |     | A   | gCc    | 7049  | 0  | 97  |         |       |          |        |          |       |            |
|   |       | Common in     |         |     |                                             |  |       |         |     |     |        |       | 2  |     |         |       |          |        |          |       |            |
| 9 | Liver | primary and   | 10:7343 | CD  |                                             |  | ENST0 | ENSP00  |     |     |        |       |    |     |         |       | high_im  |        | high_imp |       |            |
|   | metas | metastatic    | 4888    | H23 | cadherin-related 23                         |  | 00002 | 0002993 | 495 | G/  | gGc/   | rs122 | 0  | 0.9 | NA      | 2.075 | pact     | 1.838  | ct       | NA    | NA         |
|   | tases | tumors        |         |     |                                             |  | 99366 | 66      |     | A   | gCc    | 7049  |    | 99  |         |       |          |        |          |       |            |
| 9 | Prima | Private in    | 16:5586 | CES |                                             |  | ENST0 | ENSP00  |     |     |        |       |    |     |         |       | mediu    |        | high_imp |       |            |
|   | ry    | primary tumor | 0205    | 1   | carboxylesterase 1                          |  | 00004 | 0003904 | 87  | C/  | tGc/t  | rs502 | 0  | 1   | NA      | 1.953 | m_imp    | 1.574  | ct       | NA    | NA         |
|   | tumor |               |         |     |                                             |  | 22046 | 92      |     | F   | Tc     | 3782  |    |     |         |       | act      |        |          |       |            |
| 9 | Prima | Private in    | 2:27324 | CG  |                                             |  | ENST0 | ENSP00  |     |     |        |       |    |     |         |       | high_im  |        | low_imp  |       |            |
|   | ry    | primary tumor | 420     | 1   | cell growth regulator with EF-hand domain 1 |  | 00003 | 0003240 | 227 | G/  | Ggc/   | -     | 0  | 0   | NA      | 2.075 | pact     | -1.491 | ct       | NA    | NA         |
|   | tumor |               |         |     |                                             |  | 12734 | 25      |     | S   | Agc    |       |    |     |         |       |          |        |          |       |            |
| 9 | Liver | Private in    | 11:9978 | CNT |                                             |  | ENST0 | ENSP00  |     |     |        |       |    |     |         |       | high_im  |        | medium_i |       |            |
|   | metas | metastatic    | 6797    | N5  | contactin 5                                 |  | 00004 | 0003932 | 123 | F/I | Ttt/At | -     | 0  | 0.9 | NA      | 2.062 | pact     | 1.039  | mpact    | NA    | NA         |
|   | tases | tumor         |         |     |                                             |  | 18526 | 29      |     |     | t      |       |    | 68  |         |       |          |        |          |       |            |
| 9 | Prima | Common in     | 8:13989 | COL |                                             |  | ENST0 | ENSP00  |     |     |        |       |    |     |         |       | high_im  |        | high_imp |       |            |
|   | ry    | primary and   | 0409    | 22A | collagen, type XXII, alpha 1                |  | 00003 | 0003031 | 81  | R/  | cGc/   | -     | 0  | 1   | 1.52    | 2.018 | pact     | 1.682  | ct       | 0.302 | low_impact |
|   | tumor | metastatic    |         | 1   |                                             |  | 03045 | 53      |     | H   | cAc    |       |    |     |         |       |          |        |          |       |            |

|   |       |               |         |     |       |         |      |    |       |       |   |     |      |       |         |        |          |       |
|---|-------|---------------|---------|-----|-------|---------|------|----|-------|-------|---|-----|------|-------|---------|--------|----------|-------|
|   |       | tumors        |         |     |       |         |      |    |       |       |   |     |      |       |         |        |          |       |
|   |       | Common in     |         |     |       |         |      |    |       |       |   |     |      |       |         |        |          |       |
| 9 | Liver | primary and   | 8:13989 | COL | ENST0 | ENSP00  |      |    |       |       |   |     |      |       |         |        |          |       |
|   | metas | metastatic    | 0409    | 22A | 00004 | 0003876 | 81   | R/ | cGc/  | -     | 0 | 0.9 | NA   | 2.018 | high_im | 1.682  | high_imp | NA    |
|   | tases | tumors        |         | 1   | 35777 | 55      |      | H  | cAc   |       |   | 99  |      |       | pact    |        | ct       | NA    |
|   |       |               |         |     |       |         |      |    |       |       |   |     |      |       |         |        |          |       |
| 9 | Liver | Private in    | 5:17798 | COL | ENST0 | ENSP00  |      |    |       |       |   |     |      |       |         |        |          |       |
|   | metas | metastatic    | 7740    | 23A | 00004 | 0003850 | 75   | G/ | Gga/  | rs345 | 0 | 0   | NA   | 2.062 | high_im | -1.483 | low_imp  | NA    |
|   | tases | tumor         |         | 1   | 07622 | 92      |      | R  | Aga   | 94012 |   |     |      |       | pact    |        | ct       | NA    |
| 9 | Prima | Private in    | 2:18985 | COL | ENST0 | ENSP00  |      |    |       |       |   |     |      |       |         |        |          |       |
|   | ry    | primary tumor | 9541    | 3A1 | 00003 | 0003152 | 480  | G/ | gGa/  | -     | 0 | 0   | NA   | 2.263 | high_im | -2.068 | low_imp  | NA    |
|   | tumor |               |         |     | 17840 | 43      |      | V  | gTa   |       |   |     |      |       | pact    |        | ct       | NA    |
| 9 | Liver | Private in    | 8:68076 | CSP | ENST0 | ENSP00  |      |    |       |       |   |     |      |       |         |        |          |       |
|   | metas | metastatic    | 677     | P1  | 00004 | 0004157 | 571  | R/ | cGt/c | -     | 0 | 0.9 | NA   | 1.244 | mediu   | 1.787  | high_imp | NA    |
|   | tases | tumor         |         |     | 12460 | 82      |      | H  | At    |       |   | 2   |      |       | m_imp   |        | ct       | NA    |
| 9 | Liver | Private in    | 7:50547 | DD  | ENST0 | ENSP00  |      |    |       |       |   |     |      |       |         |        |          |       |
|   | metas | metastatic    | 559     | C   | 00003 | 0003506 | 316  | V/ | gTg/  | -     | 0 | 1   | 3.63 | 1.828 | mediu   | 1.697  | high_imp | 1.576 |
|   | tases | tumor         |         |     | 57936 | 16      |      | E  | gAg   |       |   |     |      |       | m_imp   |        | ct       | act   |
| 9 | Prima | Common in     | 17:7644 | DN  | ENST0 | ENSP00  |      |    |       |       |   |     |      |       |         |        |          |       |
|   | ry    | primary and   | 6377    | AH1 | 00003 | 0003006 | 3662 | D/ | Gat/  | rs228 | 0 | 0.9 | NA   | 0.13  | mediu   | 1.81   | high_imp | NA    |
|   | tumor | metastatic    |         | 7   | 00671 | 71      |      | N  | Aat   | 9752  | 1 | 99  |      |       | m_imp   |        | ct       | NA    |
|   |       | tumors        |         |     |       |         |      |    |       |       |   |     |      |       | act     |        |          | NA    |
| 9 | Liver | Common in     | 17:7644 | DN  | ENST0 | ENSP00  |      |    |       |       |   |     |      |       |         |        |          |       |
|   | metas | primary and   | 6377    | AH1 | 00004 | 0003961 | 868  | D/ | Gat/  | rs228 | 0 | 0.9 | NA   | 0.13  | mediu   | 1.81   | high_imp | NA    |
|   | tases | metastatic    |         | 7   | 42057 | 66      |      | N  | Aat   | 9752  | 1 | 99  |      |       | m_imp   |        | ct       | NA    |
|   |       | tumors        |         |     |       |         |      |    |       |       |   |     |      |       | act     |        |          | NA    |
| 9 | Liver | Private in    | 11:1030 | DY  | ENST0 | ENSP00  |      |    |       |       |   |     |      |       |         |        |          |       |
|   | metas | metastatic    | 49880   | NC2 | 00003 | 0003811 | 2089 | N/ | Aat/T | -     | 0 | 1   | NA   | 1.879 | mediu   | 1.685  | high_imp | NA    |
|   | tases | tumor         |         | H1  | 98093 | 67      |      | Y  | at    |       |   |     |      |       | m_imp   |        | ct       | NA    |
| 9 | Liver | Private in    | 21:4019 | ETS | ENST0 | ENSP00  | 381  | F/ | tTc/t | -     | 0 | 1   | 1.29 | 0.681 | mediu   | 1.936  | high_imp | 0.307 |

|   |       |               |         |     |                                         |       |         |      |     |        |   |   |     |       |       |         |        |          |       |            |
|---|-------|---------------|---------|-----|-----------------------------------------|-------|---------|------|-----|--------|---|---|-----|-------|-------|---------|--------|----------|-------|------------|
|   | metas | metastatic    | 3576    | 2   | homolog 2 (avian)                       | 00003 | 0003541 |      | S   | Cc     | . |   |     |       | m_imp |         | ct     |          |       |            |
|   | tases | tumor         |         |     |                                         | 60938 | 94      |      |     |        | 0 |   |     |       | act   |         |        |          |       |            |
|   |       |               |         |     |                                         |       |         |      |     |        | 3 |   |     |       |       |         |        |          |       |            |
| 9 | Liver | Private in    | 11:9208 | FAT | FAT tumor suppressor homolog 3          | ENST0 | ENSP00  |      |     |        |   |   |     |       |       |         |        |          |       |            |
|   | metas | metastatic    | 8232    | 3   | (Drosophila)                            | 00005 | 0004325 | 835  | I/K | aTa/   | - | 0 | 0.2 | NA    | 2.075 | high_im | -0.112 | low_imp  | NA    | NA         |
|   | tases | tumor         |         |     |                                         | 25166 | 86      |      |     | aAa    | - | 0 | 34  |       |       | pact    |        | ct       |       |            |
|   |       | Common in     |         |     |                                         |       |         |      |     |        |   | 0 |     |       |       |         |        |          |       |            |
| 9 | Prima | primary and   | 4:15324 | FBX | F-box and WD repeat domain containing 7 | ENST0 | ENSP00  |      | T/  | aCt/a  | - | . | 0.9 | NA    | 1.138 | mediu   |        | high_imp | NA    | NA         |
|   | ry    | metastatic    | 9390    | W7  |                                         | 00005 | 0004352 | 224  | S   | Gt     | - | 0 | 95  | NA    | 1.138 | m_imp   | 1.556  | ct       | NA    | NA         |
|   | tumor | tumors        |         |     |                                         | 34231 | 13      |      |     |        |   | 1 |     |       |       | act     |        |          |       |            |
|   |       | Common in     |         |     |                                         |       |         |      |     |        |   | 0 |     |       |       |         |        |          |       |            |
| 9 | Liver | primary and   | 4:15324 | FBX | F-box and WD repeat domain containing 7 | ENST0 | ENSP00  |      | T/  | aCt/a  | - | . | 0.9 | NA    | 1.138 | mediu   |        | high_imp | NA    | NA         |
|   | metas | metastatic    | 9390    | W7  |                                         | 00005 | 0004352 | 224  | S   | Gt     | - | 0 | 95  | NA    | 1.138 | m_imp   | 1.556  | ct       | NA    | NA         |
|   | tases | tumors        |         |     |                                         | 34231 | 13      |      |     |        |   | 1 |     |       |       | act     |        |          |       |            |
|   |       | Common in     |         |     |                                         |       |         |      |     |        |   | 0 |     |       |       |         |        |          |       |            |
| 9 | Prima | primary and   | 19:4036 | FC  | Fc fragment of IgG binding protein      | ENST0 | ENSP00  |      | G/  | Ggg/   | - | . | 1   | 2.19  | -0.60 | low_im  |        | high_imp | 1.23  | medium_imp |
|   | ry    | metastatic    | 6322    | GB  |                                         | 00002 | 0002213 | 4638 | R   | Agg    | - | 4 | 4   | 4     | 4     | pact    | 1.894  | ct       | 1.23  | act        |
|   | tumor | tumors        |         | P   |                                         | 21347 | 47      |      |     |        |   | 4 |     |       |       |         |        |          |       |            |
|   |       | Common in     |         |     |                                         |       |         |      |     |        |   | 0 |     |       |       |         |        |          |       |            |
| 9 | Liver | primary and   | 19:4036 | FC  | Fc fragment of IgG binding protein      | ENST0 | ENSP00  |      | G/  | Ggg/   | - | . | 1   | 2.19  | -0.60 | low_im  |        | high_imp | 1.23  | medium_imp |
|   | metas | metastatic    | 6322    | GB  |                                         | 00002 | 0002213 | 4638 | R   | Agg    | - | 4 | 4   | 4     | 4     | pact    | 1.894  | ct       | 1.23  | act        |
|   | tases | tumors        |         | P   |                                         | 21347 | 47      |      |     |        |   | 4 |     |       |       |         |        |          |       |            |
|   |       | Common in     |         |     |                                         |       |         |      |     |        |   | 0 |     |       |       |         |        |          |       |            |
| 9 | Prima | Private in    | 4:15975 | FNI | folliculin interacting protein 2        | ENST0 | ENSP00  |      | Q/  | Caa/   | - | 0 | 0.7 | NA    | 2.062 | high_im |        | medium_i | NA    | NA         |
|   | ry    | primary tumor | 4684    | P2  |                                         | 00005 | 0004208 | 22   | K   | Aaa    | - | 0 | 22  |       |       | pact    | 0.439  | mpact    |       |            |
|   | tumor | tumors        |         |     |                                         | 04715 | 41      |      |     |        |   |   |     |       |       |         |        |          |       |            |
|   |       | Common in     |         |     |                                         |       |         |      |     |        |   | 0 |     |       |       |         |        |          |       |            |
| 9 | Prima | primary and   | 2:18667 | FSI | fibrous sheath interacting protein 2    | ENST0 | ENSP00  |      | S/  | tCt/tT | - | 0 | 0.9 | 0.975 | 2.929 | high_im |        | medium_i | 0.08  | low_impact |
|   | ry    | metastatic    | 1831    | P2  |                                         | 00003 | 0003444 | 6022 | F   | t      | - | 0 | 96  |       |       | pact    | 1.44   | mpact    |       |            |
|   | tumor | tumors        |         |     |                                         | 43098 | 03      |      |     |        |   |   |     |       |       |         |        |          |       |            |
| 9 | Liver | Common in     | 2:18667 | FSI | fibrous sheath interacting protein 2    | ENST0 | ENSP00  | 5933 | S/  | tCt/tT | - | 0 | 0.9 | 1.04  | 2.929 | high_im | 1.44   | medium_i | 0.151 | low_impact |

|   |                  |                               |             |         |                                              |       |         |     |     |          |            |   |     |    |      |       |               |        |               |       |               |
|---|------------------|-------------------------------|-------------|---------|----------------------------------------------|-------|---------|-----|-----|----------|------------|---|-----|----|------|-------|---------------|--------|---------------|-------|---------------|
|   | metastases       | primary and metastatic tumors | 1831        | P2      |                                              | 00004 | 0004013 |     | F   | t        |            |   |     | 96 |      |       | pact          |        | mpact         |       |               |
|   |                  |                               |             |         |                                              | 24728 | 06      |     |     |          |            |   |     |    |      |       |               |        |               |       |               |
|   |                  | Common in                     |             |         |                                              | ENST0 | ENSP00  |     |     |          |            |   |     |    |      |       |               |        |               |       |               |
| 9 | Primary tumor    | primary and metastatic tumors | X:19042064  | GP R64  | G protein-coupled receptor 64                | 00003 | 0003490 | 144 | R/L | cGc/cTc  | -          | 0 | 0.1 | 47 | NA   | 2.048 | high_impact   | -0.186 | low_impact    | NA    | NA            |
|   |                  | Common in                     |             |         |                                              | ENST0 | ENSP00  |     |     |          |            |   |     |    |      |       |               |        |               |       |               |
| 9 | Liver metastases | primary and metastatic tumors | X:19042064  | GP R64  | G protein-coupled receptor 64                | 00003 | 0003810 | 81  | R/L | cGc/cTc  | -          | 0 | 0.8 | 89 | NA   | 2.048 | high_impact   | 0.762  | medium_impact | NA    | NA            |
|   |                  | Common in                     |             |         |                                              | ENST0 | ENSP00  |     |     |          |            |   |     |    |      |       |               |        |               |       |               |
| 9 | Primary tumor    | primary and metastatic tumors | 2:144903170 | GT DC1  | glycosyltransferase-like domain containing 1 | 00003 | 0003766 | 106 | F/I | Ttc/A tc | -          | 3 | 0.9 | 98 | NA   | -0.45 | low_impact    | 1.724  | high_impact   | NA    | NA            |
|   |                  | Common in                     |             |         |                                              | ENST0 | ENSP00  |     |     |          |            |   |     |    |      |       |               |        |               |       |               |
| 9 | Liver metastases | primary and metastatic tumors | 2:144903170 | GT DC1  | glycosyltransferase-like domain containing 1 | 00003 | 0003766 | 106 | F/I | Ttc/A tc | -          | 3 | 0.9 | 98 | NA   | -0.45 | low_impact    | 1.724  | high_impact   | NA    | NA            |
|   |                  | Private in                    |             |         |                                              | ENST0 | ENSP00  |     |     |          |            |   |     |    |      |       |               |        |               |       |               |
| 9 | Liver metastases | metastatic tumor              | 12:96384250 | HAL     | histidine ammonia-lyase                      | 00002 | 0002612 | 259 | P/R | cCa/cGa  | rs12143432 | 0 | 0.9 | 99 | 4.3  | 1.88  | medium_impact | 1.742  | high_impact   | 2.369 | medium_impact |
|   |                  | Common in                     |             |         |                                              | ENST0 | ENSP00  |     |     |          |            |   |     |    |      |       |               |        |               |       |               |
| 9 | Primary tumor    | primary and metastatic tumors | 22:17589794 | IL17 RA | interleukin 17 receptor A                    | 00003 | 0003209 | 562 | P/Q | cCg/cAg  | rs12484684 | 0 | 0.9 | 98 | 2.36 | 0.393 | medium_impact | 1.689  | high_impact   | 1.024 | medium_impact |
|   |                  | Common in                     |             |         |                                              | ENST0 | ENSP00  |     |     |          |            |   |     |    |      |       |               |        |               |       |               |
| 9 | Liver metastases | primary and metastatic tumors | 22:17589794 | IL17 RA | interleukin 17 receptor A                    | 00004 | 0004000 | 510 | P/Q | cCg/cAg  | rs12484684 | 0 | 0.9 | 99 | NA   | 0.277 | medium_impact | 1.855  | high_impact   | NA    | NA            |
|   |                  |                               |             |         |                                              | 25985 | 78      |     |     |          |            |   |     | 8  |      |       |               |        |               |       |               |

|   |       |               |         |      |                                                                      |       |         |      |    |        |       |     |     |       |         |       |        |          |       |            |
|---|-------|---------------|---------|------|----------------------------------------------------------------------|-------|---------|------|----|--------|-------|-----|-----|-------|---------|-------|--------|----------|-------|------------|
|   | Prima |               |         |      |                                                                      | ENST0 | ENSP00  |      |    |        |       | 0   |     |       |         |       |        |          |       |            |
| 9 | ry    | Private in    | 2:23730 | IQC  |                                                                      | 00002 | 0002546 | 451  | L/ | ttA/tt | .     | 0.9 |     |       | mediu   |       |        |          |       |            |
|   | tumor | primary tumor | 0679    | A1   | IQ motif containing with AAA domain 1                                | 54653 | 53      |      | F  | T      | -     | 0   | 98  | NA    | 0.83    | m_imp | 1.666  | high_imp | NA    | NA         |
|   |       |               |         |      |                                                                      |       |         |      |    |        |       | 2   |     |       | act     |       | ct     |          |       |            |
| 9 | ry    | Private in    | 3:52830 | ITIH |                                                                      | ENST0 | ENSP00  |      | P/ | Ccc/   | -     | 0   | 0.9 |       | high_im |       |        | high_imp | NA    | NA         |
|   | tumor | primary tumor | 632     | 3    | inter-alpha (globulin) inhibitor H3                                  | 00003 | 0003816 | 84   | A  | Gcc    | -     | 0   | 98  | NA    | 2.194   | pact  | 1.838  | ct       |       |            |
|   |       |               |         |      |                                                                      | 98670 | 62      |      |    |        |       |     |     |       |         |       |        |          |       |            |
| 9 | ry    | Private in    | 7:15064 | KC   |                                                                      | ENST0 | ENSP00  |      | A/ | Gct/   | -     | 0   | 0.2 |       | high_im |       |        | medium_i | NA    | NA         |
|   | tumor | primary tumor | 7067    | NH2  | potassium voltage-gated channel, subfamily H (eag-related), member 2 | 00004 | 0003876 | 863  | P  | Cct    | -     | 0   | 65  | NA    | 2.309   | pact  | 0.294  | mpact    |       |            |
|   |       |               |         |      |                                                                      | 30723 | 57      |      |    |        |       |     |     |       |         |       |        |          |       |            |
| 9 | metas | Private in    | 1:19639 | KC   |                                                                      | ENST0 | ENSP00  |      | E/ | gAa/   | -     | 0   | 0.9 |       | high_im |       |        | medium_i | NA    | NA         |
|   | tases | metastatic    | 7323    | NT2  | potassium channel, subfamily T, member 2                             | 00005 | 0004455 | 120  | V  | gTa    | -     | 0   | 09  | NA    | 2.293   | pact  | 0.663  | mpact    |       |            |
|   |       |               |         |      |                                                                      | 35608 | 84      |      |    |        |       |     |     |       |         |       |        |          |       |            |
| 9 | ry    | Private in    | X:44966 | KD   |                                                                      | ENST0 | ENSP00  |      | E/ | gAa/   | -     | 0   | 0.0 |       | high_im |       |        | low_imp  | NA    | NA         |
|   | tumor | primary tumor | 780     | M6A  | lysine (K)-specific demethylase 6A                                   | 00005 | 0004430 | 1256 | G  | gGa    | -     | 0   | 33  | NA    | 2.061   | pact  | -0.545 | ct       |       |            |
|   |       |               |         |      |                                                                      | 43216 | 78      |      |    |        |       |     |     |       |         |       |        |          |       |            |
| 9 | ry    | Private in    | X:44966 | KD   |                                                                      | ENST0 | ENSP00  |      | C/ | Tgt/   | -     | 0   | 0.9 |       | high_im |       |        | medium_i | NA    | NA         |
|   | tumor | primary tumor | 776     | M6A  | lysine (K)-specific demethylase 6A                                   | 00004 | 0003989 | 977  | G  | Ggt    | -     | 0   | 93  | NA    | 2.061   | pact  | 1.496  | mpact    |       |            |
|   |       |               |         |      |                                                                      | 33797 | 29      |      |    |        |       |     |     |       |         |       |        |          |       |            |
| 9 | metas | Private in    | 6:33374 | KIF  |                                                                      | ENST0 | ENSP00  |      | L/ | cTt/c  | -     | 0   | 0.9 |       | high_im |       |        | high_imp | 2.499 | medium_imp |
|   | tases | metastatic    | 193     | C1   | kinesin family member C1                                             | 00004 | 0003939 | 586  | P  | Ct     | -     | 0   | 97  | 3.62  | 2.056   | pact  | 1.545  | ct       |       | act        |
|   |       |               |         |      |                                                                      | 28849 | 63      |      |    |        |       |     |     |       |         |       |        |          |       |            |
| 9 | ry    | Private in    | 12:5324 | KRT  |                                                                      | ENST0 | ENSP00  |      | L/ | cTg/c  | rs201 | 0   | 0.9 |       | high_im |       |        | medium_i | 2.093 | medium_imp |
|   | tumor | primary tumor | 2440    | 78   | keratin 78                                                           | 00003 | 0003062 | 92   | P  | Cg     | 3335  | 0   | 96  | 3.45  | 2.018   | pact  | 1.348  | mpact    |       | act        |
|   |       |               |         |      |                                                                      | 04620 | 61      |      |    |        |       |     |     |       |         |       |        |          |       |            |
| 9 | ry    | Private in    | 10:8598 | LRI  |                                                                      | ENST0 | ENSP00  |      | G/ | gGc/   | -     | 0   | 1   |       | high_im |       |        | high_imp | NA    | NA         |
|   | tumor | primary tumor | 1890    | T2   | leucine-rich repeat, immunoglobulin-like and transmembrane domains 2 | 00005 | 0004382 | 490  | V  | gTc    | -     | 0   | 1   | NA    | 2.062   | pact  | 1.894  | ct       |       |            |
|   |       |               |         |      |                                                                      | 38192 | 64      |      |    |        |       |     |     |       |         |       |        |          |       |            |
| 9 | metas | Private in    | 21:4587 | LRR  |                                                                      | ENST0 | ENSP00  |      | P/ | cCt/c  | rs783 | 0   | 0.9 |       | high_im |       |        | medium_i | 1.078 | medium_imp |
|   | tases | metastatic    | 7078    | C3   | leucine rich repeat containing 3                                     | 00002 | 0002915 | 184  | L  | Tt     | 62277 | 0   | 92  | 2.045 | 2.062   | pact  | 1.384  | mpact    |       | act        |

|   |       |               |         |     |                                              |       |         |      |    |       |       |   |     |       |       |          |       |             |       |             |
|---|-------|---------------|---------|-----|----------------------------------------------|-------|---------|------|----|-------|-------|---|-----|-------|-------|----------|-------|-------------|-------|-------------|
|   | tases | tumor         |         |     |                                              | 91592 | 92      |      |    |       |       |   |     |       |       |          |       |             |       |             |
|   |       | Common in     |         |     |                                              | ENST0 | ENSP00  |      |    |       |       |   |     |       |       |          |       |             |       |             |
| 9 | Prima | primary and   | 11:7637 | LRR | leucine rich repeat containing 32            | 00004 | 0003857 | 134  | N/ | Aac/  | -     | 0 | 1   | 3.94  | 2.062 | high_im  | 1.894 | high_impact | 3.066 | high_impact |
|   | ry    | metastatic    | 2237    | C32 |                                              | 04995 | 66      |      | Y  | Tac   |       |   |     |       |       | pact     |       | ct          |       |             |
|   | tumor | tumors        |         |     |                                              |       |         |      |    |       |       |   |     |       |       |          |       |             |       |             |
|   |       | Common in     |         |     |                                              | ENST0 | ENSP00  |      |    |       |       |   |     |       |       |          |       |             |       |             |
| 9 | Liver | primary and   | 11:7637 | LRR | leucine rich repeat containing 32            | 00004 | 0003857 | 134  | N/ | Aac/  | -     | 0 | 1   | 3.94  | 2.062 | high_im  | 1.894 | high_impact | 3.066 | high_impact |
|   | metas | metastatic    | 2237    | C32 |                                              | 04995 | 66      |      | Y  | Tac   |       |   |     |       |       | pact     |       | ct          |       |             |
|   | tases | tumors        |         |     |                                              |       |         |      |    |       |       |   |     |       |       |          |       |             |       |             |
|   |       | Private in    | 6:31683 | LY6 | lymphocyte antigen 6 complex, locus G6D      | 00003 | 0003649 | 9    | L/ | Ttg/  | rs374 | 0 | 0.7 | NA    | 2.929 | high_im  | 0.379 | medium_i    | NA    | NA          |
| 9 | metas | metastatic    | 157     | G6D |                                              | 75824 | 84      |      | V  | Gtg   | 9952  |   | 82  |       |       | pact     |       | mpact       |       |             |
|   | tases | tumor         |         |     |                                              |       |         |      |    |       |       |   |     |       |       |          |       |             |       |             |
|   |       | Private in    | X:51638 | MA  | melanoma antigen family D, 1                 | 00004 | 0004020 | 40   | P/ | cCa/  | -     | 0 | 0.9 | NA    | 2.033 | high_im  | 1.005 | medium_i    | NA    | NA          |
| 9 | ry    | primary tumor | 222     | GE  |                                              | 30189 | 32      |      | L  | cTa   |       |   | 75  |       |       | pact     |       | mpact       |       |             |
|   | tumor | tumors        |         |     |                                              |       |         |      |    |       |       |   |     |       |       |          |       |             |       |             |
|   |       | Private in    | 6:16153 | MA  | mitogen-activated protein kinase kinase      | 00003 | 0003558 | 1474 | R/ | Cgt/T | -     | 0 | 1   | NA    | 1.785 | mediu    | 2.108 | high_impact | NA    | NA          |
| 9 | ry    | primary tumor | 3750    | P3K | kinase 4                                     | 66919 | 86      |      | C  | gt    |       |   |     |       |       | m_impact |       | ct          |       |             |
|   | tumor | tumors        |         |     |                                              |       |         |      |    |       |       |   |     |       |       |          |       |             |       |             |
|   |       | Private in    | 5:12677 | ME  | multiple EGF-like-domains 10                 | 00002 | 0002744 | 639  | H/ | caC/  | -     | . | 0.9 | 1.265 | 0.083 | mediu    | 1.671 | high_impact | 0.226 | low_impact  |
| 9 | ry    | primary tumor | 0455    | GF1 |                                              | 74473 | 73      |      | Q  | caG   |       |   | 1   | 98    |       | m_impact |       | ct          |       |             |
|   | tumor | tumors        |         |     |                                              |       |         |      |    |       |       |   |     |       |       |          |       |             |       |             |
|   |       | Private in    | 19:4639 | MY  | Myb-related transcription factor, partner of | 00003 | 0003254 | 337  | P/ | cCc/  | -     | 0 | 0.5 | 0.695 | 2.052 | high_im  | 0.307 | medium_i    | -0.51 | low_impact  |
| 9 | ry    | primary tumor | 4071    | PO  | profilin                                     | 22217 | 02      |      | H  | cAc   |       |   | 94  |       |       | pact     |       | mpact       |       |             |
|   | tumor | tumors        |         |     |                                              |       |         |      |    |       |       |   |     |       |       |          |       |             |       |             |
|   |       | Private in    | 2:23374 | NG  | neuronal guanine nucleotide exchange factor  | 00003 | 0003626 | 538  | E/ | gaG/  | -     | . | 0.9 | NA    | 0.688 | mediu    | 1.594 | high_impact | NA    | NA          |
| 9 | ry    | primary tumor | 5908    | EF  |                                              | 73552 | 53      |      | D  | gaC   |       |   | 0   | 97    |       | m_impact |       | ct          |       |             |
|   | tumor | tumors        |         |     |                                              |       |         |      |    |       |       |   |     |       |       |          |       |             |       |             |
|   |       | Private in    | 3:13243 | NP  | nephronophthisis 3 (adolescent)              | 00003 | 0003626 | 538  | E/ | gaG/  | -     | . | 0.9 | NA    | 0.688 | mediu    | 1.594 | high_impact | NA    | NA          |
| 9 | Liver | Primary in    | 3:13243 | NP  | nephronophthisis 3 (adolescent)              | 00003 | 0003626 | 538  | D  | gaC   |       |   | 0   | 97    |       | m_impact |       | ct          |       |             |
|   | tumor | tumors        |         |     |                                              |       |         |      |    |       |       |   |     |       |       |          |       |             |       |             |
|   |       | Private in    | 3:13243 | NP  | nephronophthisis 3 (adolescent)              | 00003 | 0003626 | 538  | E/ | gaG/  | -     | . | 0.9 | NA    | 0.688 | mediu    | 1.594 | high_impact | NA    | NA          |
| 9 | Liver | Private in    | 3:13243 | NP  | nephronophthisis 3 (adolescent)              | 00003 | 0003626 | 538  | D  | gaC   |       |   | 0   | 97    |       | m_impact |       | ct          |       |             |
|   | tumor | tumors        |         |     |                                              |       |         |      |    |       |       |   |     |       |       |          |       |             |       |             |
|   |       | Private in    | 3:13243 | NP  | nephronophthisis 3 (adolescent)              | 00003 | 0003626 | 538  | E/ | gaG/  | -     | . | 0.9 | NA    | 0.688 | mediu    | 1.594 | high_impact | NA    | NA          |
| 9 | Liver | Private in    | 3:13243 | NP  | nephronophthisis 3 (adolescent)              | 00003 | 0003626 | 538  | D  | gaC   |       |   | 0   | 97    |       | m_impact |       | ct          |       |             |
|   | tumor | tumors        |         |     |                                              |       |         |      |    |       |       |   |     |       |       |          |       |             |       |             |
|   |       | Private in    | 3:13243 | NP  | nephronophthisis 3 (adolescent)              | 00003 | 0003626 | 538  | E/ | gaG/  | -     | . | 0.9 | NA    | 0.688 | mediu    | 1.594 | high_impact | NA    | NA          |
| 9 | Liver | Private in    | 3:13243 | NP  | nephronophthisis 3 (adolescent)              | 00003 | 0003626 | 538  | D  | gaC   |       |   | 0   | 97    |       | m_impact |       | ct          |       |             |
|   | tumor | tumors        |         |     |                                              |       |         |      |    |       |       |   |     |       |       |          |       |             |       |             |

|   |       |               |         |     |                                               |       |         |      |     |        |    |     |       |       |         |          |          |          |             |
|---|-------|---------------|---------|-----|-----------------------------------------------|-------|---------|------|-----|--------|----|-----|-------|-------|---------|----------|----------|----------|-------------|
|   | metas | metastatic    | 7889    | HP3 |                                               | 00003 | 0003387 |      | Ata |        | 24 |     |       | pact  |         | ct       |          |          |             |
|   | tases | tumor         |         |     |                                               | 37331 | 66      |      |     |        |    |     |       |       |         |          |          |          |             |
| 9 | Prima | Private in    | 5:17672 | NS  | nuclear receptor binding SET domain protein   | ENST0 | ENSP00  |      |     |        |    |     |       | mediu |         | high_imp |          |          |             |
|   | ry    | primary tumor | 2013    | D1  | 1                                             | 00003 | 0003543 | 2445 | L/  | ttA/tt | -  | 0   | 0.9   | NA    | 1.43    | m_imp    | 1.601    | NA       | NA          |
|   | tumor |               |         |     |                                               | 61032 | 10      |      | F   | T      |    | 0   | 96    |       |         | act      |          |          |             |
| 9 | Liver | Private in    | 12:2964 | OV  |                                               | ENST0 | ENSP00  |      | T/  | Aca/   |    | 0   | 0.8   | 3.985 | 2.061   | high_im  |          | medium_i |             |
|   | metas | metastatic    | 9145    | CH1 | ovochoymase 1                                 | 00003 | 0003267 | 84   | A   | Gca    | -  | 0   | 14    |       |         | pact     | 0.519    | 2.384    | medium_imp  |
|   | tases | tumor         |         |     |                                               | 18184 | 08      |      |     |        |    |     |       |       |         |          |          |          | act         |
|   | Prima | Common in     |         |     |                                               | ENST0 | ENSP00  |      |     |        |    | 0   |       |       |         | mediu    |          |          |             |
| 9 | ry    | primary and   | 3:12240 | PAR | poly (ADP-ribose) polymerase family, member   | ENST0 | ENSP00  |      | R/  | Cgg/   | -  | .   | 0.9   | 2.16  | 0.594   | m_imp    | 1.569    | 0.962    | high_imp    |
|   | tumor | metastatic    | 4034    | P14 | 14                                            | 00003 | 0003812 | 64   | W   | Tgg    |    | 0   | 95    |       |         | act      |          |          | low_impact  |
|   |       | tumors        |         |     |                                               | 98162 | 28      |      |     |        |    | 4   |       |       |         |          |          |          |             |
| 9 | Liver | Common in     | 3:12240 | PAR | poly (ADP-ribose) polymerase family, member   | ENST0 | ENSP00  |      | R/  | Cgg/   | -  | 0   | 0.4   | NA    | 2.061   | high_im  |          | medium_i |             |
|   | metas | metastatic    | 4034    | P14 | 14                                            | 00004 | 0004185 | 73   | W   | Tgg    |    | 0   | 7     |       |         | pact     | 0.236    | NA       | NA          |
|   | tases | tumors        |         |     |                                               | 94811 | 35      |      |     |        |    |     |       |       |         |          |          |          |             |
| 9 | Liver | Private in    | 7:82581 | PCL |                                               | ENST0 | ENSP00  |      | S/  | tCt/tT |    | N   | 0.9   | NA    | NA      | NA       | 1.832    | NA       | high_imp    |
|   | metas | metastatic    | 285     | O   | piccolo (presynaptic cytomatrix protein)      | 00004 | 0003883 | 2995 | F   | t      | -  | A   | 96    |       |         |          |          |          | NA          |
|   | tases | tumor         |         |     |                                               | 23517 | 93      |      |     |        |    |     |       |       |         |          |          |          | NA          |
| 9 | Prima | Private in    | 19:9958 | PIN | peptidylprolyl cis/trans isomerase,           | ENST0 | ENSP00  |      | L/  | Ctg/   |    | 0   | 0.9   | 3.67  | 2.954   | high_im  |          | high_imp |             |
|   | ry    | primary tumor | 798     | 1   | NIMA-interacting 1                            | 00002 | 0002479 | 122  | V   | Gtg    | -  | 0   | 76    |       |         | pact     | 1.983    | 4.176    | high_impact |
|   | tumor |               |         |     |                                               | 47970 | 70      |      |     |        |    |     |       |       |         |          |          |          |             |
| 9 | Prima | Private in    | 11:6402 | PLC | phospholipase C, beta 3                       | ENST0 | ENSP00  |      | R/  | cGg/   |    | 0.9 | 1.695 | -3.32 | low_im  |          | high_imp |          |             |
|   | ry    | primary tumor | 3045    | B3  | (phosphatidylinositol-specific)               | 00002 | 0002792 | 185  | L   | cTg    | -  | 1   | 93    |       | 9       | pact     | 1.59     | 0.709    | low_impact  |
|   | tumor |               |         |     |                                               | 79230 | 30      |      |     |        |    |     |       |       |         |          |          |          |             |
| 9 | Liver | Private in    | 12:1940 | PLE | pleckstrin homology domain containing, family | ENST0 | ENSP00  |      | H/  | Cat/T  |    | 0.9 | NA    | 2.192 | high_im |          | high_imp |          |             |
|   | metas | metastatic    | 6875    | KHA | A member 5                                    | 00005 | 0004396 | 77   | Y   | at     | -  | 0   | 93    |       |         | pact     | 1.534    | NA       | NA          |
|   | tases | tumor         |         | 5   |                                               | 38714 | 73      |      |     |        |    |     |       |       |         |          |          |          |             |
| 9 | Prima | Private in    | 22:2204 | PPI | peptidylprolyl isomerase (cyclophilin)-like 2 | ENST0 | ENSP00  |      | G/  | Ggg/   |    | 0   | 1     | 4.62  | 1.916   | mediu    |          | high_imp |             |
|   | ry    | primary tumor | 2368    | L2  |                                               | 00003 | 0003818 | 332  | R   | Cgg    | -  | 0   | 1     |       |         | m_imp    | 1.788    | 2.315    | medium_imp  |
|   |       |               |         |     |                                               |       |         |      |     |        |    |     |       |       |         |          |          |          | act         |





|   |        |               |         |     |                                           |       |         |     |    |       |       |   |     |       |       |         |       |          |       |             |
|---|--------|---------------|---------|-----|-------------------------------------------|-------|---------|-----|----|-------|-------|---|-----|-------|-------|---------|-------|----------|-------|-------------|
|   | tases  | metastatic    |         |     | 95706                                     | 57    |         |     |    |       |       |   |     |       |       |         |       |          |       |             |
|   |        | tumors        |         |     |                                           |       |         |     |    |       |       |   |     |       |       |         |       |          |       |             |
| 9 | Prima  | Private in    | 17:1816 | SM  | Smith-Magenis syndrome chromosome         | ENST0 | ENSP00  |     |    |       |       |   |     |       |       |         |       |          |       |             |
|   | ry     | primary tumor | 6114    | CR7 | region, candidate 7                       | 00003 | 0003790 | 27  | N/ | aAt/a | -     | 0 | 0.5 | NA    | 2.062 | high_im | 0.288 | medium_i | NA    | NA          |
|   | tumor  |               |         |     |                                           | 95704 | 56      |     | T  | Ct    |       |   |     |       |       |         |       |          |       |             |
| 9 | Liver  | Private in    | 17:1816 | SM  | Smith-Magenis syndrome chromosome         | ENST0 | ENSP00  |     |    |       |       |   |     |       |       |         |       |          |       |             |
|   | metas  | metastatic    | 6114    | CR7 | region, candidate 7                       | 00003 | 0003790 | 38  | N/ | aAt/a | -     | 0 | 0.9 | NA    | 2.062 | high_im | 1.145 | medium_i | NA    | NA          |
|   | tases  | tumor         |         |     |                                           | 95706 | 57      |     | S  | Gt    |       |   |     |       |       |         |       |          |       |             |
| 9 | Prima  | Private in    | 17:1816 | SM  | Smith-Magenis syndrome chromosome         | ENST0 | ENSP00  |     |    |       |       |   |     |       |       |         |       |          |       |             |
|   | ry     | primary tumor | 6111    | CR7 | region, candidate 7                       | 00003 | 0003790 | 37  | A/ | gCc/  | -     | 0 | 0.9 | NA    | 1.137 | mediu   |       | high_imp | NA    | NA          |
|   | tumor  |               |         |     |                                           | 95706 | 57      |     | D  | gAc   |       |   |     |       |       |         |       |          |       |             |
| 9 | Prima  | Private in    | 3:18143 | SO  | SRY (sex determining region Y)-box 2      | ENST0 | ENSP00  |     |    |       |       |   |     |       |       |         |       |          |       |             |
|   | ry     | primary tumor | 0452    | X2  |                                           | 00004 | 0004391 | 102 | M/ | Atg/  | -     | 0 | 0.8 | NA    | 2.063 | high_im | 0.634 | medium_i | NA    | NA          |
|   | tumor  |               |         |     |                                           | 31565 | 11      |     | V  | Gtg   |       |   |     |       |       |         |       |          |       |             |
| 9 | Prima  | Private in    | 3:18143 | SO  | SRY (sex determining region Y)-box 2      | ENST0 | ENSP00  |     |    |       |       |   |     |       |       |         |       |          |       |             |
|   | ry     | primary tumor | 0450    | X2  |                                           | 00003 | 0003235 | 101 | H/ | cAc/c | -     | 0 | 0.9 | 4.145 | 2.063 | high_im | 1.884 | high_imp | 3.297 | high_impact |
|   | tumor  |               |         |     |                                           | 25404 | 88      |     | P  | Cc    |       |   |     |       |       |         |       |          |       |             |
| 9 | Prima  | Private in    | 3:18143 | SO  | SRY (sex determining region Y)-box 2      | ENST0 | ENSP00  |     |    |       |       |   |     |       |       |         |       |          |       |             |
|   | ry     | primary tumor | 0447    | X2  |                                           | 00004 | 0004391 | 100 | L/ | cTg/c | -     | 0 | 0.8 | NA    | 2.063 | high_im | 0.691 | medium_i | NA    | NA          |
|   | tumor  |               |         |     |                                           | 31565 | 11      |     | R  | Gg    |       |   |     |       |       |         |       |          |       |             |
| 9 | Prima  | Common in     | 6:44310 | SPA | spermatogenesis associated, serine-rich 1 | ENST0 | ENSP00  |     |    |       |       |   |     |       |       |         |       |          |       |             |
|   | ry     | primary and   | 854     | TS1 |                                           | 00002 | 0004244 | 8   | G/ | Gga/  | rs109 | 0 | 0.9 | 1.79  | 2.929 | high_im | 1.384 | medium_i | 0.972 | low_impact  |
|   | tumor  | metastatic    |         |     |                                           | 88390 | 00      |     | R  | Aga   | 48132 |   |     |       |       |         |       |          |       |             |
| 9 | Liver  | Common in     | 6:44310 | SPA | spermatogenesis associated, serine-rich 1 | ENST0 | ENSP00  |     |    |       |       |   |     |       |       |         |       |          |       |             |
|   | metas  | primary and   | 854     | TS1 |                                           | 00003 | 0004375 | 8   | G/ | Gga/  | rs109 | 0 | 0.9 | NA    | 2.929 | high_im | 1.384 | medium_i | NA    | NA          |
|   | tases  | metastatic    |         |     |                                           | 23108 | 52      |     | R  | Aga   | 48132 |   |     |       |       |         |       |          |       |             |
|   | tumors |               |         |     |                                           |       |         |     |    |       |       |   |     |       |       |         |       |          |       |             |
| 9 | Liver  | Private in    | 7:99917 | SPD | speedy homolog E3 (Xenopus laevis)        | ENST0 | ENSP00  | 94  | Y/ | Tac/  | -     | 0 | 0.9 | NA    | 2.929 | high_im | 1.44  | medium_i | NA    | NA          |

|   |       |               |         |     |                                             |       |         |      |     |       |       |   |     |       |       |         |         |          |          |       |             |
|---|-------|---------------|---------|-----|---------------------------------------------|-------|---------|------|-----|-------|-------|---|-----|-------|-------|---------|---------|----------|----------|-------|-------------|
|   | metas | metastatic    | 252     | YE3 |                                             | 00004 | 0004011 |      | D   | Gac   |       |   |     | 96    |       |         | pact    |          | mpact    |       |             |
|   | tases | tumor         |         |     |                                             | 37326 | 47      |      |     |       |       |   |     |       |       |         |         |          |          |       |             |
|   | Liver | Private in    |         |     |                                             | ENST0 | ENSP00  |      |     |       |       |   |     |       |       |         |         |          |          |       |             |
| 9 | metas | metastatic    | 2:22034 | SPE | SPEG complex locus                          | 00002 | 0002653 | 2530 | S/  | Agc/  | -     | 0 | 0.8 |       | NA    | 2.032   | high_im |          | medium_i |       | NA          |
|   | tases | tumor         | 9773    | G   |                                             |       |         |      | C   | Tgc   |       |   |     |       |       |         | pact    |          | mpact    |       | NA          |
|   | Prima | Private in    | 1:32279 | SP  |                                             | ENST0 | ENSP00  |      |     |       |       |   |     |       |       |         |         |          |          |       |             |
| 9 | ry    | primary tumor | 629     | OC  | SPOC domain containing 1                    | 00005 | 0004358 | 436  | R/  | Cgg/  | rs666 | 0 | 0.9 |       | NA    | 2.069   | high_im |          | medium_i |       | NA          |
|   | tumor |               |         | D1  |                                             |       |         |      | W   | Tgg   | 9563  |   |     |       |       |         | pact    |          | mpact    |       | NA          |
|   | Liver | Private in    | 7:75890 | SR  |                                             | ENST0 | ENSP00  |      |     |       |       |   |     |       |       |         |         |          |          |       |             |
| 9 | metas | metastatic    |         | RM  | serine/arginine repetitive matrix 3         | 00003 | 0003252 | 183  | K/I | aAa/  | -     | 0 | 0.9 |       | 1.7   | 2.929   | high_im |          | medium_i |       | 0.874       |
|   | tases | tumor         | 194     | 3   |                                             |       |         |      |     | aTa   |       |   |     |       |       |         | pact    |          | mpact    |       | low_impact  |
|   | Prima | Private in    | X:48207 | SSX |                                             | ENST0 | ENSP00  |      |     |       |       |   |     |       |       |         |         |          |          |       |             |
| 9 | ry    | primary tumor | 000     | 3   | synovial sarcoma, X breakpoint 3            | 00003 | 0003660 | 81   | R/  | cGt/c | -     | 0 | 0.0 |       | NA    | 2.084   | high_im |          | low_imp  |       | NA          |
|   | tumor |               |         |     |                                             |       |         |      | H   | At    |       |   |     |       |       |         | pact    |          | ct       |       | NA          |
|   | Prima | Common in     |         |     |                                             | ENST0 | ENSP00  |      |     |       |       |   |     |       |       |         |         |          |          |       |             |
| 9 | ry    | primary and   | 1:47717 | STI | SCL/TAL1 interrupting locus                 | 00003 | 0003373 | 1099 | N/  | Aat/  | -     | . | 0.9 |       | 1.39  | 0.846   | m_imp   |          | high_imp |       | 0.534       |
|   | tumor | metastatic    | 377     | L   |                                             |       |         |      | H   | Cat   |       |   |     |       |       |         | act     |          | ct       |       | low_impact  |
|   | Liver | Common in     |         |     |                                             | ENST0 | ENSP00  |      |     |       |       |   |     |       |       |         |         |          |          |       |             |
| 9 | metas | primary and   | 1:47717 | STI | SCL/TAL1 interrupting locus                 | 00003 | 0003373 | 1099 | N/  | Aat/  | -     | . | 0.9 |       | 1.39  | 0.846   | m_imp   |          | high_imp |       | 0.534       |
|   | tases | metastatic    | 377     | L   |                                             |       |         |      | H   | Cat   |       |   |     |       |       |         | act     |          | ct       |       | low_impact  |
|   | Liver | Private in    | 11:1245 | TBR |                                             | ENST0 | ENSP00  |      |     |       |       |   |     |       |       |         |         |          |          |       |             |
| 9 | metas | metastatic    | 02114   | G1  | transforming growth factor beta regulator 1 | 00003 | 0003641 | 255  | P/  | Cca/  | rs765 | 0 | 0.9 |       | NA    | 2.064   | high_im |          | high_imp |       | NA          |
|   | tases | tumor         |         |     |                                             |       |         |      | S   | Tca   | 70671 |   |     |       |       |         | pact    |          | ct       |       | NA          |
|   | Prima | Common in     |         |     |                                             | ENST0 | ENSP00  |      |     |       |       |   |     |       |       |         |         |          |          |       |             |
| 9 | ry    | primary and   | 17:7577 | TP5 | tumor protein p53                           | 00004 | 0003988 | 267  | R/  | Cgg/  | rs558 | 0 | 1   | 3.145 | 2.265 | high_im |         | high_imp |          | 4.415 |             |
|   | tumor | metastatic    | 139     | 3   |                                             |       |         |      | G   | Ggg   | 32599 |   |     |       |       |         | pact    |          | ct       |       | high_impact |
|   | Liver | Common in     | 17:7577 | TP5 | tumor protein p53                           | ENST0 | ENSP00  | 256  | R/  | Cgg/  | rs558 | 0 | 1   | NA    | 2.265 | high_im |         | high_imp |          | NA    |             |

|   |                  |                               |         |      |     |                                |  |       |         |     |     |       |       |   |     |    |       |      |             |             |       |               |
|---|------------------|-------------------------------|---------|------|-----|--------------------------------|--|-------|---------|-----|-----|-------|-------|---|-----|----|-------|------|-------------|-------------|-------|---------------|
|   | metastases       | primary and metastatic tumors | 139     | 3    |     |                                |  | 00003 | 0003797 | G   | Ggg | 32599 |       |   |     |    |       | pact | ct          |             |       |               |
|   |                  |                               |         |      |     |                                |  | 96473 | 35      |     |     |       |       |   |     |    |       |      |             |             |       |               |
|   |                  |                               |         |      |     |                                |  |       |         |     |     |       |       |   |     |    |       |      |             |             |       |               |
|   |                  |                               |         |      |     |                                |  |       |         |     |     |       |       |   |     |    |       |      |             |             |       |               |
| 9 | Primary tumor    | Private in primary tumor      | 2:14812 | 31   | TPO | thyroid peroxidase             |  | ENST0 | ENSP00  |     |     |       |       |   |     |    |       |      |             |             |       |               |
|   |                  |                               |         |      |     |                                |  | 00003 | 0003188 | 398 | S/  | aGc/  | rs217 | . | 0.9 |    |       |      | mediu       | high_impact | NA    | NA            |
|   |                  |                               |         |      |     |                                |  | 45913 | 20      |     | T   | aCc   | 5977  | 0 | 94  | NA | 0.746 |      | m_impact    | 1.632       |       |               |
|   |                  |                               |         |      |     |                                |  |       |         |     |     |       |       |   |     |    |       |      |             |             |       |               |
|   |                  |                               |         |      |     |                                |  |       |         |     |     |       |       |   |     |    |       |      |             |             |       |               |
|   |                  |                               |         |      |     |                                |  |       |         |     |     |       |       |   |     |    |       |      |             |             |       |               |
| 9 | Liver metastases | Private in metastatic tumor   | 6:12383 | 3491 | TRD | triadin                        |  | ENST0 | ENSP00  |     |     |       |       |   |     |    |       |      |             |             |       |               |
|   |                  |                               |         |      |     |                                |  | 00003 | 0003543 | 28  | K/  | aaA/  | -     | 0 | 0   | NA | 2.031 |      | high_impact | -1.492      |       | low_impact    |
|   |                  |                               |         |      |     |                                |  | 61029 | 07      |     | N   | aaC   | -     |   |     |    |       |      |             |             |       | NA            |
|   |                  |                               |         |      |     |                                |  |       |         |     |     |       |       |   |     |    |       |      |             |             |       | NA            |
|   |                  |                               |         |      |     |                                |  |       |         |     |     |       |       |   |     |    |       |      |             |             |       |               |
|   |                  |                               |         |      |     |                                |  |       |         |     |     |       |       |   |     |    |       |      |             |             |       |               |
| 9 | Liver metastases | Private in metastatic tumor   | 1:11765 | 9352 | TRI | tripartite motif containing 45 |  | ENST0 | ENSP00  |     |     |       |       |   |     |    |       |      |             |             |       |               |
|   |                  |                               |         |      |     |                                |  | 00003 | 0003584 | 356 | R/  | cGg/  | rs373 | . | 0.9 |    |       |      | mediu       | high_impact | NA    | NA            |
|   |                  |                               |         |      |     |                                |  | 69461 | 73      |     | Q   | cAg   | 8413  | 0 | 96  |    |       |      | m_impact    | 1.6         |       |               |
|   |                  |                               |         |      |     |                                |  |       |         |     |     |       |       |   |     |    |       |      |             |             |       |               |
|   |                  |                               |         |      |     |                                |  |       |         |     |     |       |       |   |     |    |       |      |             |             |       |               |
| 9 | Primary tumor    | Private in primary tumor      | 17:7387 | 4071 | TRI | tripartite motif containing 47 |  | ENST0 | ENSP00  |     |     |       |       |   |     |    |       |      |             |             |       |               |
|   |                  |                               |         |      |     |                                |  | 00002 | 0002548 | 187 | R/  | Cgg/  | rs460 | 0 | 0.9 |    |       |      | high_impact | high_impact | 2.24  | 2.11          |
|   |                  |                               |         |      |     |                                |  | 54816 | 16      |     | W   | Tgg   | 0514  | 0 | 98  |    |       |      | pact        | 1.876       |       | 1.38          |
|   |                  |                               |         |      |     |                                |  |       |         |     |     |       |       |   |     |    |       |      |             |             |       | medium_impact |
|   |                  |                               |         |      |     |                                |  |       |         |     |     |       |       |   |     |    |       |      |             |             |       | act           |
|   |                  |                               |         |      |     |                                |  |       |         |     |     |       |       |   |     |    |       |      |             |             |       |               |
|   |                  |                               |         |      |     |                                |  |       |         |     |     |       |       |   |     |    |       |      |             |             |       |               |
| 9 | Liver metastases | Private in metastatic tumor   | 19:3616 | 8781 | UPK | uropolakin 1A                  |  | ENST0 | ENSP00  |     |     |       |       |   |     |    |       |      |             |             |       |               |
|   |                  |                               |         |      |     |                                |  | 00002 | 0002222 | 239 | A/  | gCc/  | -     | . | 0.9 |    |       |      | mediu       | high_impact | 1.525 | 0.026         |
|   |                  |                               |         |      |     |                                |  | 22275 | 75      |     | V   | gTc   | -     | 1 | 93  |    |       |      | m_impact    | 1.672       |       | 0.026         |
|   |                  |                               |         |      |     |                                |  |       |         |     |     |       |       |   |     |    |       |      |             |             |       | low_impact    |
|   |                  |                               |         |      |     |                                |  |       |         |     |     |       |       |   |     |    |       |      |             |             |       |               |
|   |                  |                               |         |      |     |                                |  |       |         |     |     |       |       |   |     |    |       |      |             |             |       |               |
| 9 | Liver metastases | Private in metastatic tumor   | 2:12847 | 7234 | WD  | WD repeat domain 33            |  | ENST0 | ENSP00  |     |     |       |       |   |     |    |       |      |             |             |       |               |
|   |                  |                               |         |      |     |                                |  | 00003 | 0003253 | 789 | G/  | Ggc/  | -     | 0 | 0.9 |    |       |      | high_impact | high_impact | 0.55  | 2.062         |
|   |                  |                               |         |      |     |                                |  | 22313 | 77      |     | R   | Cgc   | -     | 0 | 95  |    |       |      | pact        | 1.5         |       | -0.49         |
|   |                  |                               |         |      |     |                                |  |       |         |     |     |       |       |   |     |    |       |      |             |             |       | low_impact    |
|   |                  |                               |         |      |     |                                |  |       |         |     |     |       |       |   |     |    |       |      |             |             |       |               |
|   |                  |                               |         |      |     |                                |  |       |         |     |     |       |       |   |     |    |       |      |             |             |       |               |
| 9 | Liver metastases | Private in metastatic tumor   | 19:7685 | 441  | XAB | XPA binding protein 2          |  | ENST0 | ENSP00  |     |     |       |       |   |     |    |       |      |             |             |       |               |
|   |                  |                               |         |      |     |                                |  | 00003 | 0003511 | 696 | D/  | Gac/  | -     | . | 0.9 |    |       |      | mediu       | high_impact | 2.425 | 0.571         |
|   |                  |                               |         |      |     |                                |  | 58368 | 37      |     | H   | Cac   | -     | 0 | 98  |    |       |      | m_impact    | 1.724       |       | 1.477         |
|   |                  |                               |         |      |     |                                |  |       |         |     |     |       |       |   |     |    |       |      |             |             |       | act           |
|   |                  |                               |         |      |     |                                |  |       |         |     |     |       |       |   |     |    |       |      |             |             |       |               |
|   |                  |                               |         |      |     |                                |  |       |         |     |     |       |       |   |     |    |       |      |             |             |       |               |
| 9 | Primary tumor    | Private in primary tumor      | 19:5246 | 8203 | ZNF | zinc finger protein 350        |  | ENST0 | ENSP00  |     |     |       |       |   |     |    |       |      |             |             |       |               |
|   |                  |                               |         |      |     |                                |  | 00002 | 0002436 | 501 | R/  | agA/  | rs227 | 0 | 0.0 |    |       |      | high_impact | low_impact  | 0.695 | 2.089         |
|   |                  |                               |         |      |     |                                |  |       |         |     | S   | agT   | 8415  | 0 | 36  |    |       |      | pact        | -0.619      |       | -0.272        |
|   |                  |                               |         |      |     |                                |  |       |         |     |     |       |       |   |     |    |       |      |             |             |       | low_impact    |

|    |                         |                                                  |                 |                 |                                                        |                |                   |     |         |             |               |        |           |      |       |                 |        |                   |       |                   |
|----|-------------------------|--------------------------------------------------|-----------------|-----------------|--------------------------------------------------------|----------------|-------------------|-----|---------|-------------|---------------|--------|-----------|------|-------|-----------------|--------|-------------------|-------|-------------------|
|    | tumor                   |                                                  |                 |                 | 43644                                                  | 44             |                   |     |         |             |               |        |           |      |       |                 |        |                   |       |                   |
| 9  | Prima<br>ry<br>tumor    | Private in<br>primary tumor                      | X:47307<br>799  | ZNF<br>41       | zinc finger protein 41                                 | ENST0<br>00003 | ENSP00<br>0003802 | 467 | H/<br>R | cAt/c<br>Gt | -<br>-        | 0<br>0 | 0.9<br>99 | NA   | 2.066 | high_im<br>pact | 1.96   | high_imp<br>act   | NA    | NA                |
| 9  | Prima<br>ry<br>tumor    | Private in<br>primary tumor                      | 19:1990<br>5488 | ZNF<br>506      | zinc finger protein 506                                | ENST0<br>00004 | ENSP00<br>0003938 | 403 | G/<br>V | gGc/<br>gTc | -<br>-        | 0<br>0 | 0.9<br>99 | 3.08 | 2.084 | high_im<br>pact | 1.992  | high_imp<br>act   | 1.87  | medium_imp<br>act |
| 9  | Prima<br>ry<br>tumor    | Private in<br>primary tumor                      | 19:5837<br>0895 | ZNF<br>587      | zinc finger protein 587                                | ENST0<br>00003 | ENSP00<br>0003653 | 329 | R/<br>L | cGt/c<br>Tt | -<br>-        | 0<br>0 | 0.6<br>83 | NA   | 2.084 | high_im<br>pact | 0.447  | medium_i<br>mpact | NA    | NA                |
| 9  | Prima<br>ry<br>tumor    | Private in<br>primary tumor                      | 19:2080<br>7298 | ZNF<br>626      | zinc finger protein 626                                | ENST0<br>00004 | ENSP00<br>0003908 | 386 | F/<br>S | tTt/tC<br>t | -<br>-        | 0<br>0 | 0.9<br>99 | NA   | 2.056 | high_im<br>pact | 1.933  | high_imp<br>act   | NA    | NA                |
| 9  | Prima<br>ry<br>tumor    | Private in<br>primary tumor                      | 1:26688<br>458  | ZNF<br>683      | zinc finger protein 683                                | ENST0<br>00004 | ENSP00<br>0003847 | 420 | H/<br>L | cAc/c<br>Tc | -<br>-        | 0<br>0 | 0.9<br>98 | 2.76 | 2.064 | high_im<br>pact | 1.829  | high_imp<br>act   | 1.742 | medium_imp<br>act |
| 9  | Prima<br>ry<br>tumor    | Common in<br>primary and<br>metastatic<br>tumors | 16:3139<br>541  | ZSC<br>AN1<br>0 | zinc finger and SCAN domain containing 10              | ENST0<br>00005 | ENSP00<br>0004400 | 510 | K/<br>Q | Aag/<br>Cag | -<br>-        | 0<br>0 | 0.9<br>15 | NA   | 2.089 | high_im<br>pact | 0.821  | medium_i<br>mpact | NA    | NA                |
| 9  | Liver<br>metas<br>tases | Common in<br>primary and<br>metastatic<br>tumors | 16:3139<br>541  | ZSC<br>AN1<br>0 | zinc finger and SCAN domain containing 10              | ENST0<br>00005 | ENSP00<br>0004400 | 510 | K/<br>Q | Aag/<br>Cag | -<br>-        | 0<br>0 | 0.9<br>15 | NA   | 2.089 | high_im<br>pact | 0.821  | medium_i<br>mpact | NA    | NA                |
| 10 | Prima<br>ry<br>tumor    | Private in<br>primary tumor                      | 1:94578<br>549  | ABC<br>A4       | ATP-binding cassette, sub-family A (ABC1),<br>member 4 | ENST0<br>00005 | ENSP00<br>0004376 | 47  | P/<br>R | cCa/<br>cGa | -<br>-        | 0<br>0 | 0<br>0    | NA   | 2.189 | high_im<br>pact | -1.45  | low_imp<br>act    | NA    | NA                |
| 10 | Prima<br>ry<br>tumor    | Common in<br>primary and<br>metastatic           | 12:6752<br>776  | AC<br>RBP       | acrosin binding protein                                | ENST0<br>00004 | ENSP00<br>0004027 | 303 | T/<br>A | Acc/<br>Gcc | rs374<br>1923 | 0<br>0 | 0.0<br>13 | NA   | 2.064 | high_im<br>pact | -0.877 | low_imp<br>act    | NA    | NA                |

|    |       |             |         |     |                                            |       |         |     |    |       |       |   |     |       |       |          |        |             |        |               |
|----|-------|-------------|---------|-----|--------------------------------------------|-------|---------|-----|----|-------|-------|---|-----|-------|-------|----------|--------|-------------|--------|---------------|
|    |       | tumors      |         |     |                                            |       |         |     |    |       |       |   |     |       |       |          |        |             |        |               |
|    |       | Common in   |         |     |                                            |       |         |     |    |       |       |   |     |       |       |          |        |             |        |               |
| 10 | Liver | primary and | 12:6752 | AC  |                                            | ENST0 | ENSP00  |     |    |       |       |   |     |       |       |          |        |             |        |               |
|    | metas | metastatic  | 776     | RBP | acrosin binding protein                    | 00004 | 0004027 | 303 | T/ | Acc/  | rs374 | 0 | 0.0 | NA    | 2.064 | high_im  | -0.877 | low_impact  | NA     | NA            |
|    | tases | tumors      |         |     |                                            | 14226 | 25      |     | A  | Gcc   | 1923  |   | 13  |       |       | pact     |        |             |        |               |
|    |       | Common in   |         |     |                                            |       |         |     |    |       |       |   |     |       |       |          |        |             |        |               |
| 10 | Prima | primary and | 12:7457 | ACS | acyl-CoA synthetase medium-chain family    | ENST0 | ENSP00  |     |    |       |       |   |     |       |       |          |        |             |        |               |
|    | ry    | metastatic  | 072     | M4  | member 4                                   | 00003 | 0003823 | 49  | P/ | Cct/T | -     | 0 | 0.9 | 1.69  | 2.665 | high_im  | 0.678  | medium_i    | -0.082 | low_impact    |
|    | tumor | tumors      |         |     |                                            | 99422 | 49      |     | S  | ct    |       |   | 95  |       |       | pact     |        | mpact       |        |               |
|    |       | Common in   |         |     |                                            |       |         |     |    |       |       |   |     |       |       |          |        |             |        |               |
| 10 | Liver | primary and | 12:7457 | ACS | acyl-CoA synthetase medium-chain family    | ENST0 | ENSP00  |     |    |       |       |   |     |       |       |          |        |             |        |               |
|    | metas | metastatic  | 072     | M4  | member 4                                   | 00003 | 0003823 | 49  | P/ | Cct/T | -     | 0 | 0.9 | 1.69  | 2.665 | high_im  | 0.678  | medium_i    | -0.082 | low_impact    |
|    | tases | tumors      |         |     |                                            | 99422 | 49      |     | S  | ct    |       |   | 95  |       |       | pact     |        | mpact       |        |               |
|    |       | Private in  |         |     |                                            |       |         |     |    |       |       |   |     |       |       |          |        |             |        |               |
| 10 | Liver | metastatic  | 15:7908 | ADA | ADAM metalloproteinase with thrombospondin | ENST0 | ENSP00  |     |    |       |       |   |     |       |       |          |        |             |        |               |
|    | metas | tumor       | 3120    | MT  | type 1 motif, 7                            | 00004 | 0003961 | 307 | T/ | aCg/  | rs212 | 0 | 0.8 | NA    | 2.174 | high_im  | 0.562  | medium_i    | NA     | NA            |
|    | tases | tumors      |         |     |                                            | 56326 | 77      |     | M  | aTg   | 7898  |   | 05  |       |       | pact     |        | mpact       |        |               |
|    |       | Private in  |         |     |                                            |       |         |     |    |       |       |   |     |       |       |          |        |             |        |               |
| 10 | Liver | metastatic  | 4:29067 | AD  | adducin 1 (alpha)                          | ENST0 | ENSP00  |     |    |       |       |   |     |       |       |          |        |             |        |               |
|    | metas | tumor       | 07      | D1  |                                            | 00003 | 0003811 | 460 | G/ | Ggg/  | rs496 | . | 1   | NA    | 0.074 | mediu    | 1.839  | high_impact | NA     | NA            |
|    | tases | tumors      |         |     |                                            | 98123 | 91      |     | W  | Tgg   | 1     |   | 0   |       |       | m_impact |        | ct          |        |               |
|    |       | Private in  |         |     |                                            |       |         |     |    |       |       |   |     |       |       |          |        |             |        |               |
| 10 | Liver | metastatic  | 6:10696 | AIM | absent in melanoma 1                       | ENST0 | ENSP00  |     |    |       |       |   |     |       |       |          |        |             |        |               |
|    | metas | tumor       | 7028    | 1   |                                            | 00003 | 0003580 | 241 | E/ | Gaa/  | -     | 0 | 0.9 | 1.955 | 2.056 | high_im  | 1.145  | medium_i    | 1.04   | medium_impact |
|    | tases | tumors      |         |     |                                            | 69066 | 62      |     | K  | Aaa   |       |   | 79  |       |       | pact     |        | mpact       |        |               |
|    |       | Private in  |         |     |                                            |       |         |     |    |       |       |   |     |       |       |          |        |             |        |               |
| 10 | Liver | metastatic  | X:55035 | ALA | aminolevulinic acid synthase 2             | ENST0 | ENSP00  |     |    |       |       |   |     |       |       |          |        |             |        |               |
|    | metas | tumor       | 653     | S2  |                                            | 00003 | 0003371 | 538 | F/ | tTc/t | -     | 0 | 0.9 | NA    | 2.575 | high_im  | 1.643  | high_impact | NA     | NA            |
|    | tases | tumors      |         |     |                                            | 35854 | 31      |     | S  | Cc    |       |   | 96  |       |       | pact     |        | ct          |        |               |
|    |       | Common in   |         |     |                                            |       |         |     |    |       |       |   |     |       |       |          |        |             |        |               |
| 10 | Prima | primary and | 3:12586 | ALD | aldehyde dehydrogenase 1 family, member    | ENST0 | ENSP00  |     |    |       |       |   |     |       |       |          |        |             |        |               |
|    | ry    | metastatic  | 5766    | H1L | L1                                         | 00004 | 0004202 | 330 | V/ | Gtt/T | rs288 | 0 | 0.0 | NA    | 2.154 | high_im  | -0.409 | low_impact  | NA     | NA            |
|    | tumor | tumors      |         |     |                                            | 72186 | 93      |     | F  | tt    | 6059  |   | 83  |       |       | pact     |        | ct          |        |               |

|    |                  |                                         |                 |                  |                                             |                         |                         |     |         |             |                |         |     |       |       |                       |        |                   |        |                   |
|----|------------------|-----------------------------------------|-----------------|------------------|---------------------------------------------|-------------------------|-------------------------|-----|---------|-------------|----------------|---------|-----|-------|-------|-----------------------|--------|-------------------|--------|-------------------|
| 10 | Liver metastases | Common in primary and metastatic tumors | 3:12586<br>5766 | ALD<br>H1L<br>1  | aldehyde dehydrogenase 1 family, member L1  | ENST0<br>00004<br>72186 | ENSP00<br>0004202<br>93 | 330 | V/<br>F | Gtt/T<br>tt | rs288<br>6059  | 0<br>83 | 0.0 | NA    | 2.154 | high_im<br>pact       | -0.409 | low_imp<br>ct     | NA     | NA                |
| 10 | Liver metastases | Private in metastatic tumor             | 19:3650<br>0397 | ALK<br>BH6       | alkB, alkylation repair homolog 6 (E. coli) | ENST0<br>00002<br>52984 | ENSP00<br>0002529<br>84 | 171 | V/<br>G | gTg/<br>gGg | -<br>-         | 0<br>92 | 0.9 | 2.325 | 2.061 | high_im<br>pact       | 1.464  | medium_i<br>mpact | 0.968  | low_impact        |
| 10 | Liver metastases | Private in metastatic tumor             | 8:14354<br>6253 | BAI<br>1         | brain-specific angiogenesis inhibitor 1     | ENST0<br>00003<br>23289 | ENSP00<br>0003130<br>46 | 232 | G/<br>R | Ggg/<br>Cgg | -<br>-         | 0<br>21 | 0.6 | 0     | 2.048 | high_im<br>pact       | 0.37   | medium_i<br>mpact | -0.941 | low_impact        |
| 10 | Primary tumor    | Private in primary tumor                | X:50659<br>488  | BM<br>P15        | bone morphogenetic protein 15               | ENST0<br>00002<br>52677 | ENSP00<br>0002526<br>77 | 354 | R/<br>W | Cgg/<br>Tgg | -<br>-         | 0<br>97 | 0.9 | 3.02  | 2.087 | high_im<br>pact       | 1.569  | high_imp<br>ct    | 1.834  | medium_imp<br>act |
| 10 | Liver metastases | Private in metastatic tumor             | 1:92442<br>695  | BR<br>DT         | bromodomain, testis-specific                | ENST0<br>00004<br>02388 | ENSP00<br>0003840<br>51 | 238 | K/<br>N | aaA/<br>aaC | rs115<br>6281  | 0<br>1  | 0.9 | 1.04  | 0.149 | mediu<br>m_imp<br>act | 1.73   | high_imp<br>ct    | 0.012  | low_impact        |
| 10 | Liver metastases | Private in metastatic tumor             | 11:6232<br>189  | C11<br>orf4<br>2 | chromosome 11 open reading frame 42         | ENST0<br>00003<br>16375 | ENSP00<br>0003210<br>21 | 307 | G/<br>R | Ggg/<br>Cgg | -<br>-         | 0<br>48 | 0.9 | 0.695 | 2.929 | high_im<br>pact       | 0.786  | medium_i<br>mpact | -0.227 | low_impact        |
| 10 | Liver metastases | Private in metastatic tumor             | 18:3096<br>9588 | C18<br>orf3<br>4 | chromosome 18 open reading frame 34         | ENST0<br>00004<br>02325 | ENSP00<br>0003852<br>34 | 42  | A/<br>T | Gcc/<br>Acc | rs126<br>06658 | 0<br>23 | 0.1 | NA    | 2.929 | high_im<br>pact       | -0.431 | low_imp<br>ct     | NA     | NA                |
| 10 | Liver metastases | Private in metastatic tumor             | 21:3046<br>4866 | C21<br>orf7      | chromosome 21 open reading frame 7          | ENST0<br>00002<br>86791 | ENSP00<br>0002867<br>91 | 112 | I/V     | Att/G<br>tt | rs374<br>6843  | 0<br>0  | 0   | NA    | 2.062 | high_im<br>pact       | -1.483 | low_imp<br>ct     | NA     | NA                |
| 10 | Primary tumor    | Common in primary and metastatic tumors | 9:98691<br>137  | C9o<br>rf10<br>2 | chromosome 9 open reading frame 102         | ENST0<br>00004<br>37817 | ENSP00<br>0004162<br>86 | 403 | V/<br>A | gTc/<br>gCc | rs227<br>4654  | 0<br>67 | 0.9 | NA    | 2.043 | high_im<br>pact       | 1.095  | medium_i<br>mpact | NA     | NA                |
| 10 | Liver            | Common in                               | 9:98691         | C9o              | chromosome 9 open reading frame 102         | ENST0                   | ENSP00                  | 274 | V/      | gTc/        | rs227          | 0       | 0.9 | NA    | 2.043 | high_im               | 1.095  | medium_i          | NA     | NA                |

|    |       |               |         |      |                                                |       |         |     |    |        |       |    |     |       |         |         |       |               |       |               |
|----|-------|---------------|---------|------|------------------------------------------------|-------|---------|-----|----|--------|-------|----|-----|-------|---------|---------|-------|---------------|-------|---------------|
|    | metas | primary and   | 137     | rf10 |                                                | 00004 | 0004097 |     | A  | gCc    | 4654  | 67 |     |       | pact    |         | mpact |               |       |               |
|    | tases | metastatic    |         | 2    |                                                | 56993 | 51      |     |    |        |       |    |     |       |         |         |       |               |       |               |
|    |       | tumors        |         |      |                                                |       |         |     |    |        |       |    |     |       |         |         |       |               |       |               |
|    | Liver | Private in    | 9:13973 | C9o  |                                                | ENST0 | ENSP00  |     |    |        |       |    |     |       | mediu   |         |       |               |       |               |
| 10 | metas | metastatic    | 4225    | rf86 | chromosome 9 open reading frame 86             | 00003 | 0003111 | 613 | K/ | aAg/   | -     | 0  | 0.9 | NA    | 1.969   | m_imp   | 1.548 | high_impact   | NA    | NA            |
|    | tases | tumor         |         |      |                                                | 11502 | 34      |     | T  | aCg    |       |    | 95  |       |         | act     |       |               |       |               |
|    | Prima | Private in    | 1:26524 | CAT  |                                                | ENST0 | ENSP00  |     |    |        |       |    |     |       | high_im |         |       |               |       |               |
| 10 | ry    | primary tumor | 549     | SPE  | cation channel, sperm associated 4             | 00005 | 0004294 | 220 | L/ | cTc/c  | -     | 0  | 0.9 | NA    | 2.075   | high_im | 1.63  | high_impact   | NA    | NA            |
|    | tumor |               |         | R4   |                                                | 18899 | 64      |     | H  | Ac     |       |    | 97  |       |         | pact    |       |               |       |               |
|    | Prima | Private in    | 2:55555 | CC   |                                                | ENST0 | ENSP00  |     |    |        |       |    |     |       |         |         |       |               |       |               |
| 10 | ry    | primary tumor | 433     | DC8  | coiled-coil domain containing 88A              | 00004 | 0004044 | 997 | K/ | aaA/   | -     | .  | 0.9 | NA    | -0.04   | low_im  |       | high_impact   | NA    | NA            |
|    | tumor |               |         | 8A   |                                                | 13716 | 31      |     | N  | aaT    |       | 1  | 93  |       | 8       | pact    | 1.683 | ct            |       |               |
|    |       |               |         |      |                                                |       |         |     |    |        |       | 9  |     |       |         |         |       |               |       |               |
|    | Prima | Private in    | 18:6756 | CD2  |                                                | ENST0 | ENSP00  |     |    |        |       |    |     |       |         |         |       |               |       |               |
| 10 | ry    | primary tumor | 3208    | 26   | CD226 molecule                                 | 00002 | 0002802 | 152 | C/ | tgT/t  | -     | 0  | 0.9 | 2.175 | 2.311   | high_im | 2.063 | high_impact   | 1.257 | medium_impact |
|    | tumor |               |         |      |                                                | 80200 | 00      |     | W  | gG     |       |    | 99  |       |         | pact    |       |               |       |               |
|    | Liver | Private in    | 17:4522 | CD   |                                                | ENST0 | ENSP00  |     |    |        |       |    |     |       |         |         |       |               |       |               |
| 10 | metas | metastatic    | 1286    | C27  | cell division cycle 27 homolog (S. cerevisiae) | 00005 | 0004373 | 378 | S/ | aGt/a  | rs774 | 0  | 0.9 | NA    | 2.062   | high_im | 1.894 | high_impact   | NA    | NA            |
|    | tases | tumor         |         |      |                                                | 27547 | 39      |     | N  | At     | 40865 |    | 99  |       |         | pact    |       |               |       |               |
|    | Liver | Private in    | 17:4522 | CD   |                                                | ENST0 | ENSP00  |     |    |        |       |    |     |       |         |         |       |               |       |               |
| 10 | metas | metastatic    | 1273    | C27  | cell division cycle 27 homolog (S. cerevisiae) | 00005 | 0004373 | 382 | F/ | ttT/tt | rs114 | 0  | 0.9 | NA    | 2.062   | high_im | 0.853 | medium_impact | NA    | NA            |
|    | tases | tumor         |         |      |                                                | 27547 | 39      |     | L  | G      | 1701  |    | 34  |       |         | pact    |       |               |       |               |
|    | Liver | Private in    | X:47086 | CD   |                                                | ENST0 | ENSP00  |     |    |        |       |    |     |       |         |         |       |               |       |               |
| 10 | metas | metastatic    | 790     | K16  | cyclin-dependent kinase 16                     | 00004 | 0004308 | 20  | N/ | Aat/   | -     | .  | 0.9 | NA    | -0.96   | low_im  |       | high_impact   | NA    | NA            |
|    | tases | tumor         |         |      |                                                | 62827 | 24      |     | D  | Gat    |       | 4  | 99  |       | 3       | pact    | 1.522 | ct            |       |               |
|    |       |               |         |      |                                                |       |         |     |    |        |       | 7  |     |       |         |         |       |               |       |               |
|    | Prima | Common in     | 12:1228 | CLI  |                                                | ENST0 | ENSP00  |     |    |        |       |    |     |       |         |         |       |               |       |               |
| 10 | ry    | primary and   | 26087   | P1   | CAP-GLY domain containing linker protein 1     | 00005 | 0004387 | 389 | L/ | tTg/t  | -     | 0  | 0.9 | NA    | 2.129   | high_im | 0.854 | medium_impact | NA    | NA            |
|    | tumor | metastatic    |         |      |                                                | 42885 | 29      |     | S  | Cg     |       |    | 15  |       |         | pact    |       |               |       |               |
|    |       | tumors        |         |      |                                                |       |         |     |    |        |       |    |     |       |         |         |       |               |       |               |



|    |                         |                                         |                  |            |                                                            |                            |      |         |             |                |         |              |          |             |        |               |       |               |
|----|-------------------------|-----------------------------------------|------------------|------------|------------------------------------------------------------|----------------------------|------|---------|-------------|----------------|---------|--------------|----------|-------------|--------|---------------|-------|---------------|
| 10 | Liver metastases tumors | Common in primary and metastatic tumors | 12:1228<br>26087 | CLI<br>P1  | CAP-GLY domain containing linker protein 1                 | ENST000005<br>ENSP00004387 | 245  | L/<br>S | tTg/t<br>Cg | -<br>0         | 0<br>65 | 0.2<br>NA    | 2.129    | high_impact | 0.043  | medium_impact | NA    | NA            |
| 10 | Primary tumor           | Private in primary tumor                | 5:79031<br>558   | CM<br>YA5  | cardiomyopathy associated 5                                | ENST000004<br>ENSP00003947 | 2324 | G/<br>S | Ggt/<br>Agt | rs626<br>21912 | 0<br>95 | 0.9<br>2.175 | 2.02     | high_impact | 1.555  | high_impact   | 1.124 | medium_impact |
| 10 | Primary tumor           | Private in primary tumor                | 7:14682<br>9418  | CNT<br>NAP | contactin associated protein-like 2                        | ENST000003<br>ENSP00003547 | 389  | R/<br>W | Cgg/<br>Tgg | -<br>0         | 0<br>98 | 0.9<br>1.79  | 0.43     | mediumpact  | 1.638  | high_impact   | 0.774 | low_impact    |
| 10 | Liver metastases tumors | Private in metastatic tumor             | 2:18991<br>6180  | COL<br>5A2 | collagen, type V, alpha 2                                  | ENST000004<br>ENSP00003986 | 573  | G/<br>R | Ggg/<br>Cgg | -<br>0         | N<br>A  | 0.9<br>98    | NA<br>NA | NA          | 1.611  | high_impact   | NA    | NA            |
| 10 | Primary tumor           | Private in primary tumor                | 8:68421<br>768   | CPA<br>6   | carboxypeptidase A6                                        | ENST000002<br>ENSP00002977 | 25   | S/<br>C | tCt/t<br>Gt | rs178<br>53192 | 0<br>76 | 0.9<br>NA    | 2.042    | high_impact | 1.214  | medium_impact | NA    | NA            |
| 10 | Liver metastases tumors | Private in metastatic tumor             | 19:4913<br>9083  | DBP        | D site of albumin promoter (albumin D-box) binding protein | ENST000002<br>ENSP00002221 | 102  | P/<br>T | Cca/<br>Aca | -<br>0         | 0<br>65 | 0.2<br>1.915 | 2.008    | high_impact | -0.023 | low_impact    | 0.996 | low_impact    |
| 10 | Liver metastases tumors | Private in metastatic tumor             | 9:10569<br>59    | DM<br>RT2  | doublesex and mab-3 related transcription factor 2         | ENST000003<br>ENSP00003508 | 458  | E/<br>Q | Gaa/<br>Caa | rs176<br>41078 | 0<br>07 | 0.9<br>NA    | 2.066    | high_impact | 0.802  | medium_impact | NA    | NA            |
| 10 | Liver metastases tumors | Private in metastatic tumor             | 11:6237<br>5714  | EML<br>3   | echinoderm microtubule associated protein like 3           | ENST000002<br>ENSP00002788 | 390  | V/<br>M | Gtg/<br>Atg | -<br>0         | 0<br>96 | 0.9<br>NA    | 0.571    | mediumpact  | 1.554  | high_impact   | NA    | NA            |
| 10 | Liver metastases tumors | Private in metastatic tumor             | 11:6237<br>3644  | EML<br>3   | echinoderm microtubule associated protein like 3           | ENST000002<br>ENSP00002788 | 517  | S/<br>C | tCt/t<br>Gt | -<br>0         | 0<br>99 | 0.9<br>NA    | 0.4      | mediumpact  | 1.894  | high_impact   | NA    | NA            |

|    |                  |                                         |              |           |                                                   |           |              |     |     |         |            |   |       |       |       |               |       |               | 6      |               |
|----|------------------|-----------------------------------------|--------------|-----------|---------------------------------------------------|-----------|--------------|-----|-----|---------|------------|---|-------|-------|-------|---------------|-------|---------------|--------|---------------|
| 10 | Liver metastases | Private in metastatic tumor             | 13:114502357 | FA M70 B  | family with sequence similarity 70, member B      | ENST00003 | ENSP00003644 | 138 | G/W | Ggg/Tgg | -          | 0 | 0.998 | NA    | 2.929 | high_impact   | 1.613 | high_impact   | NA     | NA            |
| 10 | Primary tumor    | Common in primary and metastatic tumors | 17:18653070  | FBX W10   | F-box and WD repeat domain containing 10          | ENST00003 | ENSP00003103 | 236 | E/K | Gaa/Aaa | rs9895749  | 0 | 0.96  | NA    | 2.062 | high_impact   | 0.982 | medium_impact | NA     | NA            |
| 10 | Liver metastases | Common in primary and metastatic tumors | 17:18653070  | FBX W10   | F-box and WD repeat domain containing 10          | ENST00003 | ENSP00003069 | 236 | E/K | Gaa/Aaa | rs9895749  | 0 | 0.889 | NA    | 2.062 | high_impact   | 0.714 | medium_impact | NA     | NA            |
| 10 | Primary tumor    | Private in primary tumor                | 17:80696368  | FN3 K     | fructosamine 3 kinase                             | ENST00003 | ENSP00003007 | 49  | R/W | Cgg/Tgg | -          | 0 | 0.999 | 2.475 | 1.095 | medium_impact | 1.978 | high_impact   | 1.381  | medium_impact |
| 10 | Liver metastases | Private in metastatic tumor             | 15:39910404  | FSI P1    | fibrous sheath interacting protein 1              | ENST00003 | ENSP00002802 | 411 | L/F | Ctt/Tt  | rs12908846 | 0 | 0.952 | 0.895 | 2.062 | high_impact   | 0.936 | medium_impact | -0.128 | low_impact    |
| 10 | Liver metastases | Private in metastatic tumor             | 3:180680840  | FXR 1     | fragile X mental retardation, autosomal homolog 1 | ENST00004 | ENSP00004205 | 302 | G/D | gGc/gAc | -          | 0 | 0.997 | NA    | -1.3  | low_impact    | 2.054 | high_impact   | NA     | NA            |
| 10 | Liver metastases | Private in metastatic tumor             | 1:193074705  | GLR X2    | glutaredoxin 2                                    | ENST00003 | ENSP00003564 | 22  | A/T | Gca/Aca | -          | 0 | 0.832 | NA    | 2.195 | high_impact   | 0.464 | medium_impact | NA     | NA            |
| 10 | Primary tumor    | Private in primary tumor                | 19:17691513  | GLT 25D 1 | glycosyltransferase 25 domain containing 1        | ENST00003 | ENSP00003690 | 195 | V/E | gTg/gAg | -          | 0 | 0.792 | NA    | 2.04  | high_impact   | 0.563 | medium_impact | NA     | NA            |
| 10 | Primary tumor    | Private in                              | 6:24450      | GPL       | glycosylphosphatidylinositol specific             | ENST00003 | ENSP00003690 | 469 | V/  | Gtg/    | -          | 0 | 0.9   | 4.185 | 1.169 | medium_impact | 1.573 | high_impact   | 1.911  | medium_impact |

|    |        |               |         |      |                                        |       |         |     |     |       |       |     |     |       |       |         |          |          |            |
|----|--------|---------------|---------|------|----------------------------------------|-------|---------|-----|-----|-------|-------|-----|-----|-------|-------|---------|----------|----------|------------|
|    | ry     | primary tumor | 058     | D1   | phospholipase D1                       | 00002 | 0002300 |     | M   | Atg   | .     | 94  |     |       | m_imp |         | ct       |          | act        |
|    | tumor  |               |         |      |                                        | 30036 | 36      |     |     |       |       | 0   |     |       | act   |         |          |          |            |
|    |        |               |         |      |                                        |       |         |     |     |       |       | 1   |     |       |       |         |          |          |            |
|    |        |               |         |      |                                        |       |         |     |     |       |       | 0   |     |       |       |         |          |          |            |
| 10 | Liver  | Private in    | 5:17602 | GP   | G protein regulated inducer of neurite | ENST0 | ENSP00  |     |     |       |       |     |     |       | mediu |         | high_imp |          |            |
|    | metas  | metastatic    | 5287    | RIN  | outgrowth 1                            | 00003 | 0003352 | 517 | G/  | Gga/  | .     | 0.9 |     | NA    | 0.757 | m_imp   | 1.649    | ct       | NA         |
|    | tases  | tumor         |         | 1    |                                        | 35532 | 79      |     | R   | Aga   | -     | 0   | 95  |       | act   |         |          |          | NA         |
|    |        |               |         |      |                                        |       |         |     |     |       |       | 4   |     |       |       |         |          |          |            |
| 10 | Prima  | Private in    | 3:51749 | GR   | glutamate receptor, metabotropic 2     | ENST0 | ENSP00  |     | R/  | Cgg/  | -     | 0   | 1   | 3.065 | 2.538 | high_im | 1.969    | high_imp | 1.676      |
|    | ry     | primary tumor | 692     | M2   |                                        | 00003 | 0003784 | 635 | W   | Tgg   | -     | 0   |     |       |       | pact    |          | ct       |            |
|    | tumor  |               |         |      |                                        | 95052 | 92      |     |     |       |       |     |     |       |       |         |          |          | act        |
| 10 | Prima  | Private in    | 10:9318 | HE   | HECT domain containing 2               | ENST0 | ENSP00  |     | I/T | aTv/a | -     | 0   | 0.0 | 1.59  | 2.114 | high_im | -1.129   | low_imp  | 0.43       |
|    | ry     | primary tumor | 5087    | CTD  |                                        | 00002 | 0002980 | 63  |     | Ct    | -     | 0   | 04  |       |       | pact    |          | ct       |            |
|    | tumor  |               |         | 2    |                                        | 98068 | 68      |     |     |       |       |     |     |       |       |         |          |          | low_impact |
| 10 | Prima  | Common in     | X:13041 | IGS  | immunoglobulin superfamily, member 1   | ENST0 | ENSP00  |     | R/  | Cgg/  | -     | 0   | 0.9 | 0.69  | 2.439 | high_im | 1.599    | high_imp | -0.472     |
|    | ry     | primary and   | 5208    | F1   |                                        | 00003 | 0003550 | 544 | W   | Tgg   | -     | 0   | 98  |       |       | pact    |          | ct       |            |
|    | tumor  | metastatic    |         |      |                                        | 61420 | 10      |     |     |       |       |     |     |       |       |         |          |          | low_impact |
|    | tumors |               |         |      |                                        |       |         |     |     |       |       |     |     |       |       |         |          |          |            |
| 10 | Liver  | Common in     | X:13041 | IGS  | immunoglobulin superfamily, member 1   | ENST0 | ENSP00  |     | R/  | Cgg/  | -     | 0   | 0.9 | NA    | 2.439 | high_im | 0.936    | medium_i | NA         |
|    | metas  | primary and   | 5208    | F1   |                                        | 00003 | 0003599 | 535 | W   | Tgg   | -     | 0   | 79  |       |       | pact    |          | mpact    |            |
|    | tases  | metastatic    |         |      |                                        | 70910 | 47      |     |     |       |       |     |     |       |       |         |          |          | NA         |
|    | tumors |               |         |      |                                        |       |         |     |     |       |       |     |     |       |       |         |          |          | NA         |
| 10 | Prima  | Private in    | 19:3973 | IL28 | interleukin 28B (interferon, lambda 3) | ENST0 | ENSP00  |     | R/  | Cgc/  | rs773 | 0   | 1   | 2.785 | 2.087 | high_im | 1.83     | high_imp | 1.612      |
|    | ry     | primary tumor | 4325    | B    |                                        | 00004 | 0004090 | 180 | C   | Tgc   | 79751 | 0   |     |       |       | pact    |          | ct       |            |
|    | tumor  |               |         |      |                                        | 13851 | 00      |     |     |       |       |     |     |       |       |         |          |          | act        |
| 10 | Liver  | Private in    | 14:1051 | INF  | inverted formin, FH2 and WH2 domain    | ENST0 | ENSP00  |     | P/  | cCa/  | -     | 0   | 0   | 2.18  | 2.122 | high_im | -1.544   | low_imp  | 0.83       |
|    | metas  | metastatic    | 73878   | 2    | containing                             | 00003 | 0003764 | 425 | L   | cTa   | -     | 0   |     |       |       | pact    |          | ct       |            |
|    | tases  | tumor         |         |      |                                        | 92634 | 10      |     |     |       |       |     |     |       |       |         |          |          | low_impact |
| 10 | Liver  | Private in    | 14:1051 | INF  | inverted formin, FH2 and WH2 domain    | ENST0 | ENSP00  |     | P/  | cCc/  | -     | 0   | 0   | 1.365 | 2.122 | high_im | -1.544   | low_imp  | 0.049      |
|    | metas  | metastatic    | 73881   | 2    | containing                             | 00003 | 0003764 | 426 | L   | cTc   | -     | 0   |     |       |       | pact    |          | ct       |            |
|    | tases  | tumor         |         |      |                                        | 92634 | 10      |     |     |       |       |     |     |       |       |         |          |          | low_impact |

|    |               |                                         |                 |            |                                                                     |                |                   |     |         |             |                |         |                |               |                |             |             |               |            |
|----|---------------|-----------------------------------------|-----------------|------------|---------------------------------------------------------------------|----------------|-------------------|-----|---------|-------------|----------------|---------|----------------|---------------|----------------|-------------|-------------|---------------|------------|
| 10 | Primary tumor | Private in primary tumor                | 16:3137<br>4535 | ITG<br>AX  | integrin, alpha X (complement component 3 receptor 4 subunit)       | ENST0<br>00002 | ENSP00<br>0002682 | 517 | P/<br>R | cCc/<br>cGc | rs223<br>0429  | 0<br>97 | 0.9<br>97      | 1.88<br>1.949 | mediu<br>m_imp | 1.593       | high_impact | 0.622         | low_impact |
| 10 | Primary tumor | Private in primary tumor                | 1:11121<br>6263 | KC<br>NA3  | potassium voltage-gated channel, shaker-related subfamily, member 3 | ENST0<br>00003 | ENSP00<br>0003587 | 390 | T/<br>M | aCg/<br>aTg | -              | 0<br>1  | 4.075<br>2.235 | high_impact   | 2.141          | high_impact | 4.617       | high_impact   |            |
| 10 | Primary tumor | Private in primary tumor                | 6:39285<br>685  | KC<br>NK1  | potassium channel, subfamily K, member 16                           | ENST0<br>00003 | ENSP00<br>0003623 | 124 | F/<br>L | ttC/tt<br>G | -              | 0<br>99 | 0.9<br>99      | 1.57<br>2.511 | high_impact    | 2.082       | high_impact | 0.695         | low_impact |
| 10 | Metastases    | Private in metastatic tumor             | 8:13659<br>4291 | KH<br>DR   | KH domain containing, RNA binding, signal transduction associated 3 | ENST0<br>00003 | ENSP00<br>0003481 | 261 | P/<br>L | cCg/<br>cTg | -              | 0<br>13 | 0.0<br>13      | 1.7<br>2.267  | high_impact    | -0.526      | low_impact  | 0.481         | low_impact |
| 10 | Primary tumor | Private in primary tumor                | 16:8566<br>7696 | KIA<br>A01 | KIAA0182                                                            | ENST0<br>00002 | ENSP00<br>0002534 | 62  | A/<br>T | Gcc/<br>Acc | -              | 0<br>0  | 0.805<br>2.062 | high_impact   | -1.483         | low_impact  | -0.223      | low_impact    |            |
| 10 | Primary tumor | Common in primary and metastatic tumors | 13:4238<br>5446 | KIA<br>A05 | KIAA0564                                                            | ENST0<br>00003 | ENSP00<br>0003686 | 660 | R/<br>G | Aga/<br>Gga | rs956<br>2353  | 0<br>1  | 2.885<br>2.101 | high_impact   | 1.834          | high_impact | 1.483       | medium_impact |            |
| 10 | Metastases    | Common in primary and metastatic tumors | 13:4238<br>5446 | KIA<br>A05 | KIAA0564                                                            | ENST0<br>00003 | ENSP00<br>0003686 | 660 | R/<br>G | Aga/<br>Gga | rs956<br>2353  | 0<br>1  | 2.885<br>2.101 | high_impact   | 1.834          | high_impact | 1.483       | medium_impact |            |
| 10 | Primary tumor | Common in primary and metastatic tumors | 9:34256<br>634  | KIF<br>24  | kinesin family member 24                                            | ENST0<br>00004 | ENSP00<br>0004146 | 37  | H/<br>Y | Cac/<br>Tac | rs769<br>74239 | 0<br>0  | NA<br>2.056    | high_impact   | -1.51          | low_impact  | NA          | NA            |            |
| 10 | Metastases    | Common in primary and metastatic        | 9:34256<br>634  | KIF<br>24  | kinesin family member 24                                            | ENST0<br>00004 | ENSP00<br>0004146 | 37  | H/<br>Y | Cac/<br>Tac | rs769<br>74239 | 0<br>0  | NA<br>2.056    | high_impact   | -1.51          | low_impact  | NA          | NA            |            |

| tumors |       |               |         |      |       |         |      |     |       |       |   |     |       |       |          |       |               |        |               |
|--------|-------|---------------|---------|------|-------|---------|------|-----|-------|-------|---|-----|-------|-------|----------|-------|---------------|--------|---------------|
| 10     | Prima | Private in    | X:24024 | KLH  | ENST0 | ENSP00  |      |     |       |       |   |     |       |       |          |       |               |        |               |
|        | ry    | primary tumor | 195     | L15  | 00003 | 0003327 | 206  | R/  | Cgg/  | -     | 0 | 0.9 | 1.665 | 2.062 | high_im  | 1.894 | high_impact   | 0.679  | low_impact    |
|        | tumor |               |         |      | 28046 | 91      |      | W   | Tgg   |       |   |     |       |       | pact     |       |               |        |               |
|        |       |               |         |      |       |         |      |     |       |       |   |     |       |       |          |       |               |        |               |
| 10     | Prima | Private in    | 21:1552 | LIPI | ENST0 | ENSP00  |      |     |       |       |   |     |       |       |          |       |               |        |               |
|        | ry    | primary tumor | 4921    |      | 00003 | 0003433 | 385  | G/  | gGa/  | rs743 | 0 | 0.9 | NA    | 2.044 | high_im  | 1.148 | medium_impact | NA     | NA            |
|        | tumor |               |         |      | 44577 | 31      |      | E   | gAa   | 69337 |   |     |       |       | pact     |       |               |        |               |
|        |       |               |         |      |       |         |      |     |       |       |   |     |       |       |          |       |               |        |               |
| 10     | Prima | Common in     |         |      | ENST0 | ENSP00  |      |     |       |       |   |     |       |       |          |       |               |        |               |
|        | ry    | primary and   | 19:3980 | LRF  | 00002 | 0002486 | 37   | R/  | Cgc/  |       |   |     |       |       | mediu    |       | high_impact   | 1.046  | medium_impact |
|        | tumor | metastatic    | 5868    | N1   | 48668 | 68      |      | C   | Tgc   | -     | 1 | 1   | 2.015 | 0.026 | m_impact | 1.894 |               |        |               |
|        |       | tumors        |         |      |       |         |      |     |       |       |   |     |       |       |          |       |               |        |               |
|        |       |               |         |      |       |         |      |     |       |       |   |     |       |       |          |       |               |        |               |
| 10     | Liver | Common in     |         |      | ENST0 | ENSP00  |      |     |       |       |   |     |       |       |          |       |               |        |               |
|        | metas | primary and   | 19:3980 | LRF  | 00002 | 0002486 | 37   | R/  | Cgc/  |       |   |     |       |       | mediu    |       | high_impact   | 1.046  | medium_impact |
|        | tases | metastatic    | 5868    | N1   | 48668 | 68      |      | C   | Tgc   | -     | 1 | 1   | 2.015 | 0.026 | m_impact | 1.894 |               |        |               |
|        |       | tumors        |         |      |       |         |      |     |       |       |   |     |       |       |          |       |               |        |               |
|        |       |               |         |      |       |         |      |     |       |       |   |     |       |       |          |       |               |        |               |
| 10     | Prima | Private in    | 3:16951 | LRR  | ENST0 | ENSP00  |      |     |       |       |   |     |       |       |          |       |               |        |               |
|        | ry    | primary tumor | 4585    | C34  | 00005 | 0004368 | 35   | L/I | Tta/A | rs109 | 0 | 0.9 | NA    | 2.064 | high_im  | 0.973 | medium_impact | NA     | NA            |
|        | tumor |               |         |      | 28597 | 83      |      |     | ta    | 36600 |   |     |       |       | pact     |       |               |        |               |
|        |       |               |         |      |       |         |      |     |       |       |   |     |       |       |          |       |               |        |               |
| 10     | Prima | Private in    | 16:7963 | MA   | ENST0 | ENSP00  |      |     |       |       |   |     |       |       |          |       |               |        |               |
|        | ry    | primary tumor | 3594    | F    | 00003 | 0003270 | 69   | P/  | cCt/c |       | 0 | 0.9 | NA    | 2.077 | high_im  | 1.447 | medium_impact | NA     | NA            |
|        | tumor |               |         |      | 26043 | 48      |      | L   | Tt    |       |   |     |       |       | pact     |       |               |        |               |
|        |       |               |         |      |       |         |      |     |       |       |   |     |       |       |          |       |               |        |               |
| 10     | Prima | Private in    | 6:90424 | MD   | ENST0 | ENSP00  |      |     |       |       |   |     |       |       |          |       |               |        |               |
|        | ry    | primary tumor | 429     | N1   | 00003 | 0003584 | 2301 | R/  | cGa/  |       |   |     |       |       | mediu    |       | high_impact   | 1.36   | medium_impact |
|        | tumor |               |         |      | 69393 | 00      |      | Q   | cAa   | -     | 0 | 1   | 2.705 | 0.857 | m_impact | 1.9   |               |        |               |
|        |       |               |         |      |       |         |      |     |       |       |   |     |       |       |          |       |               |        |               |
|        |       |               |         |      |       |         |      |     |       |       |   |     |       |       |          |       |               |        |               |
| 10     | Liver | Private in    | 10:1299 | MKI  | ENST0 | ENSP00  |      |     |       |       |   |     |       |       |          |       |               |        |               |
|        | metas | metastatic    | 02158   | 67   | 00003 | 0003576 | 2649 | R/  | cGt/c | rs127 |   | 0.9 | 0.69  | -0.34 | low_im   | 1.566 | high_impact   | -0.356 | low_impact    |
|        | tases | tumor         |         |      | 68654 | 43      |      | H   | At    | 77740 | 2 | 96  |       | 3     | pact     |       |               |        |               |
|        |       |               |         |      |       |         |      |     |       |       |   |     |       |       |          |       |               |        |               |
|        |       |               |         |      |       |         |      |     |       |       |   |     |       |       |          |       |               |        |               |
| 10     | Prima | Private in    | 16:5553 | MM   | ENST0 | ENSP00  | 560  | G/  | Gga/  | -     | 0 | 0.9 | 3.4   | 0.727 | mediu    | 1.687 | high_impact   | 2.235  | medium_impact |

|    |        |               |         |     |                                              |       |         |      |    |       |       |     |     |       |         |         |          |          |            |            |
|----|--------|---------------|---------|-----|----------------------------------------------|-------|---------|------|----|-------|-------|-----|-----|-------|---------|---------|----------|----------|------------|------------|
|    | ry     | primary tumor | 2269    | P2  | 72kDa gelatinase, 72kDa type IV collagenase) | 00002 | 0002190 |      | R  | Aga   | .     | 98  |     |       | m_imp   |         | ct       |          | act        |            |
|    | tumor  |               |         |     |                                              | 19070 | 70      |      |    |       |       | 0   |     |       | act     |         |          |          |            |            |
|    |        |               |         |     |                                              |       |         |      |    |       |       | 3   |     |       |         |         |          |          |            |            |
| 10 | Prima  | Private in    | 6:36940 | MT  |                                              | ENST0 | ENSP00  |      | L/ | cTg/c |       | 0.9 |     |       | high_im |         | high_imp | NA       | NA         |            |
|    | ry     | primary tumor | 552     | CH1 | mitochondrial carrier homolog 1 (C. elegans) | 00003 | 0003626 | 91   | P  | Cg    | -     | 0   | 95  | NA    | 2.062   | pact    | 1.5      | ct       | NA         | NA         |
|    | tumor  |               |         |     |                                              | 73565 | 66      |      |    |       |       | 0   |     |       |         |         |          |          |            |            |
| 10 | Liver  | Private in    | 11:1017 | MU  |                                              | ENST0 | ENSP00  |      | P/ | cCa/  | rs348 | 0.9 |     |       | mediu   |         | high_imp | NA       | NA         |            |
|    | metas  | metastatic    | 183     | C6  | mucin 6, oligomeric mucus/gel-forming        | 00004 | 0004068 | 1873 | Q  | cAa   | 44844 | 0   | 96  | NA    | 1.137   | m_imp   | 1.554    | ct       | NA         | NA         |
|    | tases  | tumor         |         |     |                                              | 21673 | 61      |      |    |       |       | 0   |     |       | act     |         |          |          |            |            |
|    |        |               |         |     |                                              |       |         |      |    |       |       | 1   |     |       |         |         |          |          |            |            |
| 10 | Prima  | Private in    | 11:6563 | MU  | MUS81 endonuclease homolog (S. cerevisiae)   | ENST0 | ENSP00  |      | Y/ | Tac/  |       | 0.9 |     |       | high_im |         | medium_i |          | medium_imp |            |
|    | ry     | primary tumor | 2281    | S81 |                                              | 00003 | 0003078 | 423  | H  | Cac   | -     | 0   | 63  | 2.74  | 2.219   | pact    | 0.802    | mpact    | 2.037      | act        |
|    | tumor  |               |         |     |                                              | 08110 | 53      |      |    |       |       |     |     |       |         |         |          |          |            |            |
| 10 | Prima  | Common in     | 10:9508 | MY  |                                              | ENST0 | ENSP00  |      | R/ | cGg/  | rs115 | 0.9 |     |       | high_im |         | high_imp | NA       | NA         |            |
|    | ry     | primary and   | 3039    | OF  | myoferlin                                    | 00003 | 0003605 | 1783 | Q  | cAg   | 94445 | 0   | 99  | NA    | 2.161   | pact    | 2.029    | ct       | NA         | NA         |
|    | tumor  | metastatic    |         |     |                                              | 71501 | 56      |      |    |       |       |     |     |       |         |         |          |          |            |            |
|    | tumors |               |         |     |                                              |       |         |      |    |       |       |     |     |       |         |         |          |          |            |            |
| 10 | Liver  | Common in     | 10:9508 | MY  |                                              | ENST0 | ENSP00  |      | R/ | cGg/  | rs115 | 0.9 |     |       | high_im |         | medium_i |          | medium_imp |            |
|    | metas  | primary and   | 3039    | OF  | myoferlin                                    | 00003 | 0003522 | 1783 | Q  | cAg   | 94445 | 0   | 88  | 2.885 | 2.161   | pact    | 1.407    | mpact    | 1.75       | act        |
|    | tases  | metastatic    |         |     |                                              | 59263 | 08      |      |    |       |       |     |     |       |         |         |          |          |            |            |
|    | tumors |               |         |     |                                              |       |         |      |    |       |       |     |     |       |         |         |          |          |            |            |
| 10 | Prima  | Common in     | 11:6485 | NA  | NA                                           | ENST0 | ENSP00  |      | F/ | Ttc/C | rs228 | 0.0 |     |       | high_im |         | low_imp  | NA       | NA         |            |
|    | ry     | primary and   | 5986    |     |                                              | 00005 | 0004350 | 98   | L  | tc    | 2498  | 0   | 53  | NA    | 2.929   | pact    | -0.661   | ct       | NA         | NA         |
|    | tumor  | metastatic    |         |     |                                              | 24603 | 02      |      |    |       |       |     |     |       |         |         |          |          |            |            |
|    | tumors |               |         |     |                                              |       |         |      |    |       |       |     |     |       |         |         |          |          |            |            |
| 10 | Liver  | Common in     | 11:6485 | NA  | NA                                           | ENST0 | ENSP00  |      | F/ | Ttc/C | rs228 | 0.0 |     |       | high_im |         | low_imp  | NA       | NA         |            |
|    | metas  | primary and   | 5986    |     |                                              | 00005 | 0004324 | 98   | L  | tc    | 2498  | 0   | 53  | NA    | 2.929   | pact    | -0.661   | ct       | NA         | NA         |
|    | tases  | metastatic    |         |     |                                              | 30719 | 59      |      |    |       |       |     |     |       |         |         |          |          |            |            |
|    | tumors |               |         |     |                                              |       |         |      |    |       |       |     |     |       |         |         |          |          |            |            |
| 10 | Prima  | Private in    | 3:17534 | NAA | N-acetylated alpha-linked acidic             | ENST0 | ENSP00  | 622  | P/ | cCc/  | rs986 | 0   | 0.9 | 1.04  | 2.12    | high_im | 1.868    | high_imp | -0.028     | low_impact |

|    |        |               |         |     |                                             |       |         |      |    |       |       |    |     |       |       |         |        |          |        |            |
|----|--------|---------------|---------|-----|---------------------------------------------|-------|---------|------|----|-------|-------|----|-----|-------|-------|---------|--------|----------|--------|------------|
|    | ry     | primary tumor | 5143    | LAD | dipeptidase-like 2                          | 00004 | 0004047 |      | R  | cGc   | 6564  | 99 |     |       | pact  |         | ct     |          |        |            |
|    | tumor  |               |         | L2  |                                             | 54872 | 05      |      |    |       |       |    |     |       |       |         |        |          |        |            |
|    | Prima  | Private in    | 12:7858 | NAV |                                             | ENST0 | ENSP00  |      |    |       |       |    |     |       |       |         |        |          |        |            |
| 10 | ry     | primary tumor | 2428    | 3   | neuron navigator 3                          | 00002 | 0002283 | 1954 | L/ | Ctg/  | -     | 0  | 0.8 | NA    | 2.011 | high_im | 0.612  | medium_i | NA     | NA         |
|    | tumor  |               |         |     |                                             | 28327 | 27      |      | V  | Gtg   |       | 59 |     |       | pact  |         | mpact  |          |        |            |
|    | Prima  | Private in    | 1:14800 | NBP |                                             | ENST0 | ENSP00  |      |    |       |       |    |     |       |       |         |        |          |        |            |
| 10 | ry     | primary tumor | 9349    | F14 | neuroblastoma breakpoint family, member 14  | 00003 | 0003099 | 659  | M/ | aTg/  | -     | 0  | 0   | NA    | 2.929 | high_im | -1.667 | lowimpa  | NA     | NA         |
|    | tumor  |               |         |     |                                             | 10701 | 07      |      | T  | aCg   |       |    |     |       | pact  |         | ct     |          |        |            |
|    | Prima  | Private in    | 16:5706 | NLR |                                             | ENST0 | ENSP00  |      |    |       |       |    |     |       |       |         |        |          |        |            |
| 10 | ry     | primary tumor | 0353    | C5  | NLR family, CARD domain containing 5        | 00005 | 0004415 | 7    | C/ | Tgc/  | rs284 | 0  | 0   | NA    | 2.011 | high_im | -1.472 | lowimpa  | NA     | NA         |
|    | tumor  |               |         |     |                                             | 38110 | 97      |      | R  | Cgc   | 38857 |    |     |       | pact  |         | ct     |          |        |            |
|    | Prima  | Private in    | 4:56502 | NM  |                                             | ENST0 | ENSP00  |      |    |       |       |    |     |       |       |         |        |          |        |            |
| 10 | ry     | primary tumor | 307     | U   | neuromedin U                                | 00005 | 0004242 | 18   | A/ | gCg/  | rs382 | 0  | 0.4 | NA    | 2.026 | high_im | 0.096  | medium_i | NA     | NA         |
|    | tumor  |               |         |     |                                             | 05262 | 46      |      | E  | gAg   | 8555  |    | 38  |       | pact  |         | mpact  |          |        |            |
|    | Prima  | Common in     |         |     |                                             | ENST0 | ENSP00  |      |    |       |       | 0  |     |       |       |         |        |          |        |            |
| 10 | ry     | primary and   | 11:5475 | OR5 | olfactory receptor, family 51, subfamily I, | 00003 | 0003419 | 263  | R/ | cGc/  | rs110 | .  | 0.9 | 3     | 0.874 | mediu   |        | highimpa | 0.969  | low_impact |
|    | tumor  | metastatic    | 506     | 112 | member 2                                    | 41449 | 87      |      | H  | cAc   | 37502 | 0  | 99  |       | m_imp | 1.724   | act    | ct       |        |            |
|    | tumors |               |         |     |                                             |       |         |      |    |       |       | 1  |     |       |       |         |        |          |        |            |
|    | Liver  | Common in     |         |     |                                             | ENST0 | ENSP00  |      |    |       |       | 0  |     |       |       |         |        |          |        |            |
| 10 | metas  | primary and   | 11:5475 | OR5 | olfactory receptor, family 51, subfamily I, | 00003 | 0003419 | 263  | R/ | cGc/  | rs110 | .  | 0.9 | 3     | 0.874 | mediu   |        | highimpa | 0.969  | low_impact |
|    | tases  | metastatic    | 506     | 112 | member 2                                    | 41449 | 87      |      | H  | cAc   | 37502 | 0  | 99  |       | m_imp | 1.724   | act    | ct       |        |            |
|    | tumors |               |         |     |                                             |       |         |      |    |       |       | 1  |     |       |       |         |        |          |        |            |
|    | Prima  | Private in    | 11:6129 | OR5 |                                             | ENST0 | ENSP00  |      |    |       |       | 0  |     |       |       |         |        |          |        |            |
| 10 | ry     | primary tumor | 837     | 6B4 | olfactory receptor, family 56, subfamily B, | 00003 | 0003211 | 277  | P/ | Cct/T | rs146 | .  | 0.9 | 1.155 | -0.92 | low_im  | 1.724  | highimpa | -0.247 | low_impact |
|    | tumor  |               |         |     | member 4                                    | 16529 | 96      |      | S  | ct    | 2983  | 6  | 99  |       | pact  |         | ct     |          |        |            |
|    |        |               |         |     |                                             |       |         |      |    |       |       | 5  |     |       |       |         |        |          |        |            |
|    | Liver  | Private in    | 12:5811 |     |                                             | ENST0 | ENSP00  |      |    |       |       | 0  |     |       |       |         |        |          |        |            |
| 10 | metas  | metastatic    | 1945    | OS9 | osteosarcoma amplified 9, endoplasmic       | 00004 | 0004131 | 178  | G/ | gGc/  | -     | .  | 0.9 | NA    | 0.328 | mediu   |        | highimpa | NA     | NA         |
|    | tases  | tumor         |         |     | reticulum lectin                            | 13095 | 12      |      | D  | gAc   |       | 0  | 92  |       | m_imp | 1.537   | act    | ct       |        |            |
|    |        |               |         |     |                                             |       |         |      |    |       |       | 7  |     |       |       |         |        |          |        |            |





|    |                  |                                         |                 |                 |                                                      |                         |                         |     |         |             |                |         |           |                |               |       |               |        |               |
|----|------------------|-----------------------------------------|-----------------|-----------------|------------------------------------------------------|-------------------------|-------------------------|-----|---------|-------------|----------------|---------|-----------|----------------|---------------|-------|---------------|--------|---------------|
| 10 | Primary tumor    | Common in primary and metastatic tumors | 7:47968<br>927  | PKD<br>1L1      | polycystic kidney disease 1 like 1                   | ENST0<br>00002<br>89672 | ENSP00<br>0002896<br>72 | 312 | V/<br>F | Gtt/T<br>tt | rs268<br>6817  | 0<br>88 | 0.9<br>88 | 0.805<br>2.064 | high_impact   | 1.291 | medium_impact | -0.196 | low_impact    |
| 10 | Liver metastases | Common in primary and metastatic tumors | 7:47968<br>927  | PKD<br>1L1      | polycystic kidney disease 1 like 1                   | ENST0<br>00002<br>89672 | ENSP00<br>0002896<br>72 | 312 | V/<br>F | Gtt/T<br>tt | rs268<br>6817  | 0<br>88 | 0.9<br>88 | 0.805<br>2.064 | high_impact   | 1.291 | medium_impact | -0.196 | low_impact    |
| 10 | Primary tumor    | Common in primary and metastatic tumors | 2:19895<br>0240 | PLC<br>L1       | phospholipase C-like 1                               | ENST0<br>00004<br>37704 | ENSP00<br>0004141<br>38 | 569 | V/I     | Gta/<br>Ata | rs106<br>4213  | 0<br>94 | 0.9<br>94 | NA<br>1.95     | medium_impact | 1.629 | high_impact   | NA     | NA            |
| 10 | Liver metastases | Common in primary and metastatic tumors | 2:19895<br>0240 | PLC<br>L1       | phospholipase C-like 1                               | ENST0<br>00004<br>37704 | ENSP00<br>0004141<br>38 | 569 | V/I     | Gta/<br>Ata | rs106<br>4213  | 0<br>94 | 0.9<br>94 | NA<br>1.95     | medium_impact | 1.629 | high_impact   | NA     | NA            |
| 10 | Primary tumor    | Common in primary and metastatic tumors | 7:10221<br>2939 | POL<br>R2J<br>3 | polymerase (RNA) II (DNA directed)<br>polypeptide J3 | ENST0<br>00005<br>08848 | ENSP00<br>0004258<br>77 | 10  | F/<br>L | ttC/tt<br>G | -<br>-         | 0<br>99 | 0.9<br>99 | NA<br>1.292    | medium_impact | 2.203 | high_impact   | NA     | NA            |
| 10 | Liver metastases | Common in primary and metastatic tumors | 7:10221<br>2939 | POL<br>R2J<br>3 | polymerase (RNA) II (DNA directed)<br>polypeptide J3 | ENST0<br>00003<br>79340 | ENSP00<br>0003686<br>45 | 10  | F/<br>L | ttC/tt<br>G | -<br>-         | 0<br>99 | 0.9<br>99 | 2.39<br>1.292  | medium_impact | 2.203 | high_impact   | 1.314  | medium_impact |
| 10 | Primary tumor    | Common in primary and metastatic tumors | 6:10655<br>3435 | PR<br>DM<br>1   | PR domain containing 1, with ZNF domain              | ENST0<br>00003<br>69089 | ENSP00<br>0003580<br>85 | 333 | P/<br>L | cCg/<br>cTg | rs772<br>56382 | 0<br>92 | 0.9<br>92 | NA<br>2.066    | high_impact   | 1.438 | medium_impact | NA     | NA            |
| 10 | Liver metastases | Common in primary and                   | 6:10655<br>3435 | PR<br>DM        | PR domain containing 1, with ZNF domain              | ENST0<br>00003          | ENSP00<br>0003580       | 333 | P/<br>L | cCg/<br>cTg | rs772<br>56382 | 0<br>92 | 0.9<br>92 | NA<br>2.066    | high_impact   | 1.438 | medium_impact | NA     | NA            |

|    |       |               |         |     |                                            |       |         |     |    |       |       |   |     |      |       |         |        |               |        |             |
|----|-------|---------------|---------|-----|--------------------------------------------|-------|---------|-----|----|-------|-------|---|-----|------|-------|---------|--------|---------------|--------|-------------|
|    | tases | metastatic    |         | 1   |                                            | 69089 | 85      |     |    |       |       |   |     |      |       |         |        |               |        |             |
|    |       | tumors        |         |     |                                            |       |         |     |    |       |       |   |     |      |       |         |        |               |        |             |
|    | Prima | Common in     |         |     |                                            | ENST0 | ENSP00  |     |    |       |       |   |     |      |       |         |        |               |        |             |
| 10 | ry    | primary and   | 4:15220 | PRS |                                            | 00005 | 0004311 | 36  | C/ | tGt/t | rs360 | 0 | 0.9 | NA   | 2.061 | high_im | 1.856  | high_impact   | NA     | NA          |
|    | tumor | metastatic    | 1053    | S48 | protease, serine, 48                       | 30477 | 97      |     | Y  | At    | 97019 | 0 | 99  |      |       | pact    |        | ct            |        |             |
|    |       | tumors        |         |     |                                            |       |         |     |    |       |       |   |     |      |       |         |        |               |        |             |
|    | Liver | Common in     |         |     |                                            | ENST0 | ENSP00  |     |    |       |       |   |     |      |       |         |        |               |        |             |
| 10 | metas | primary and   | 4:15220 | PRS |                                            | 00005 | 0004311 | 36  | C/ | tGt/t | rs360 | 0 | 0.9 | NA   | 2.061 | high_im | 1.856  | high_impact   | NA     | NA          |
|    | tases | metastatic    | 1053    | S48 | protease, serine, 48                       | 30477 | 97      |     | Y  | At    | 97019 | 0 | 99  |      |       | pact    |        | ct            |        |             |
|    |       | tumors        |         |     |                                            |       |         |     |    |       |       |   |     |      |       |         |        |               |        |             |
|    | Prima | Private in    | 10:8969 | PTE |                                            | ENST0 | ENSP00  |     |    |       | rs121 |   |     |      |       |         |        |               |        |             |
| 10 | ry    | primary tumor | 2905    | N   | phosphatase and tensin homolog             | 00003 | 0003610 | 130 | R/ | cGa/  | 90922 | 0 | 1   | 3.9  | 2.594 | high_im | 1.867  | high_impact   | 7.959  | high_impact |
|    | tumor |               |         |     |                                            | 71953 | 21      |     | Q  | cAa   | g     |   |     |      |       | pact    |        | ct            |        |             |
|    | Liver | Private in    | 10:2348 | PTF |                                            | ENST0 | ENSP00  |     |    |       | rs791 |   |     |      |       |         |        |               |        |             |
| 10 | metas | metastatic    | 2635    | 1A  | pancreas specific transcription factor, 1a | 00003 | 0003656 | 263 | S/ | Tcc/  | 8487  | 0 | 0   | 1.78 | 2.056 | high_im | -1.54  | low_impact    | 0.705  | low_impact  |
|    | tases | tumor         |         |     |                                            | 76504 | 87      |     | P  | Ccc   |       |   |     |      |       | pact    |        | ct            |        |             |
|    |       | tumors        |         |     |                                            |       |         |     |    |       |       |   |     |      |       |         |        |               |        |             |
|    | Prima | Common in     |         |     |                                            | ENST0 | ENSP00  |     |    |       |       |   |     |      |       |         |        |               |        |             |
| 10 | ry    | primary and   | 11:3659 | RA  |                                            | 00005 | 0004346 | 820 | K/ | aAg/  | rs222 | 0 | 0.3 | NA   | 2.114 | high_im | 0.126  | medium_impact | NA     | NA          |
|    | tumor | metastatic    | 7313    | G1  | recombination activating gene 1            | 34663 | 10      |     | R  | aGg   | 7973  | 0 | 01  |      |       | pact    |        | mpact         |        |             |
|    |       | tumors        |         |     |                                            |       |         |     |    |       |       |   |     |      |       |         |        |               |        |             |
|    | Liver | Common in     |         |     |                                            | ENST0 | ENSP00  |     |    |       |       |   |     |      |       |         |        |               |        |             |
| 10 | metas | primary and   | 11:3659 | RA  |                                            | 00002 | 0002994 | 820 | K/ | aAg/  | rs222 | 0 | 0.0 | 1.81 | 2.114 | high_im | -0.631 | low_impact    | 0.657  | low_impact  |
|    | tases | metastatic    | 7313    | G1  | recombination activating gene 1            | 99440 | 40      |     | R  | aGg   | 7973  | 0 | 25  |      |       | pact    |        | ct            |        |             |
|    |       | tumors        |         |     |                                            |       |         |     |    |       |       |   |     |      |       |         |        |               |        |             |
|    | Prima | Private in    | X:11442 | RB  |                                            | ENST0 | ENSP00  |     |    |       |       |   |     |      |       |         |        |               |        |             |
| 10 | ry    | primary tumor | 6553    | MXL | RNA binding motif protein, X-linked-like 3 | 00004 | 0004174 | 850 | D/ | gAc/  | -     | 0 | 0.6 | 0    | 2.056 | high_im | 0.343  | medium_impact | -1.129 | low_impact  |
|    | tumor |               |         | 3   |                                            | 24776 | 51      |     | G  | gGc   |       |   | 32  |      |       | pact    |        | mpact         |        |             |
|    |       | tumors        |         |     |                                            |       |         |     |    |       |       |   |     |      |       |         |        |               |        |             |
|    | Prima | Private in    | 15:5934 | RNF |                                            | ENST0 | ENSP00  |     |    |       |       |   |     |      |       |         |        |               |        |             |
| 10 | ry    | primary tumor | 7930    | 111 | ring finger protein 111                    | 00004 | 0003936 | 353 | S/ | Agt/T | -     | 0 | 0.9 | 0.69 | 2.11  | high_im | 1.044  | medium_impact | -0.328 | low_impact  |
|    | tumor |               |         |     |                                            | 34298 | 41      |     | C  | gt    |       |   | 5   |      |       | pact    |        | mpact         |        |             |

|    |                         |                                                  |                 |                  |                                                                                                       |                         |                         |      |         |             |                |        |           |                |                       |       |                   |       |                   |
|----|-------------------------|--------------------------------------------------|-----------------|------------------|-------------------------------------------------------------------------------------------------------|-------------------------|-------------------------|------|---------|-------------|----------------|--------|-----------|----------------|-----------------------|-------|-------------------|-------|-------------------|
| 10 | Prima<br>ry<br>tumor    | Common in<br>primary and<br>metastatic<br>tumors | 6:45390<br>626  | RU<br>NX2        | runt-related transcription factor 2                                                                   | ENST0<br>00003<br>71438 | ENSP00<br>0003604<br>93 | 119  | P/<br>S | Ccc/<br>Tcc | -<br>-         | 0<br>0 | 0.9<br>99 | 3.165<br>2.076 | high_im<br>pact       | 2.38  | high_imp<br>act   | 2.772 | medium_imp<br>act |
| 10 | Liver<br>metas<br>tases | Common in<br>primary and<br>metastatic<br>tumors | 6:45390<br>626  | RU<br>NX2        | runt-related transcription factor 2                                                                   | ENST0<br>00003<br>71432 | ENSP00<br>0003604<br>86 | 105  | P/<br>S | Ccc/<br>Tcc | -<br>-         | 0<br>0 | 0.9<br>98 | NA<br>2.076    | high_im<br>pact       | 2.188 | high_imp<br>act   | NA    | NA                |
| 10 | Prima<br>ry<br>tumor    | Private in<br>primary tumor                      | 15:3395<br>4413 | RY<br>R3         | ryanodine receptor 3                                                                                  | ENST0<br>00004<br>15757 | ENSP00<br>0003996<br>10 | 1561 | T/<br>M | aCg/<br>aTg | -<br>-         | N<br>A | 1         | NA<br>NA       | NA                    | 1.721 | high_imp<br>act   | NA    | NA                |
| 10 | Prima<br>ry<br>tumor    | Private in<br>primary tumor                      | 8:19218<br>745  | SH2<br>D4A       | SH2 domain containing 4A                                                                              | ENST0<br>00005<br>23736 | ENSP00<br>0004280<br>48 | 168  | E/<br>G | gAa/<br>gGa | rs356<br>47122 | 0<br>0 | 0.6<br>64 | NA<br>2.062    | high_im<br>pact       | 0.372 | medium_i<br>mpact | NA    | NA                |
| 10 | Liver<br>metas<br>tases | Private in<br>metastatic<br>tumor                | 15:4852<br>7152 | SLC<br>12A<br>1  | solute carrier family 12<br>(sodium/potassium/chloride transporters),<br>member 1                     | ENST0<br>00004<br>28362 | ENSP00<br>0004103<br>67 | 202  | P/<br>L | cCa/<br>cTa | -<br>-         | 0<br>0 | 0.9<br>98 | NA<br>2.219    | high_im<br>pact       | 1.513 | high_imp<br>act   | NA    | NA                |
| 10 | Prima<br>ry<br>tumor    | Private in<br>primary tumor                      | 17:7822<br>0006 | SLC<br>26A<br>11 | solute carrier family 26, member 11                                                                   | ENST0<br>00005<br>46047 | ENSP00<br>0004407<br>24 | 384  | T/<br>M | aCg/<br>aTg | -<br>-         | 0<br>0 | 1         | NA<br>1.828    | mediu<br>m_imp<br>act | 1.702 | high_imp<br>act   | NA    | NA                |
| 10 | Prima<br>ry<br>tumor    | Common in<br>primary and<br>metastatic<br>tumors | 7:15076<br>7637 | SLC<br>4A2       | solute carrier family 4, anion exchanger,<br>member 2 (erythrocyte membrane protein<br>band 3-like 1) | ENST0<br>00004<br>85713 | ENSP00<br>0004194<br>12 | 515  | E/<br>K | Gag/<br>Aag | -<br>-         | 0<br>0 | 0.9<br>97 | 3.775<br>1.963 | mediu<br>m_imp<br>act | 1.601 | high_imp<br>act   | 2.434 | medium_imp<br>act |
| 10 | Liver<br>metas<br>tases | Common in<br>primary and<br>metastatic<br>tumors | 7:15076<br>7637 | SLC<br>4A2       | solute carrier family 4, anion exchanger,<br>member 2 (erythrocyte membrane protein<br>band 3-like 1) | ENST0<br>00004<br>13384 | ENSP00<br>0004056<br>00 | 515  | E/<br>K | Gag/<br>Aag | -<br>-         | 0<br>0 | 0.9<br>97 | 3.775<br>1.963 | mediu<br>m_imp<br>act | 1.601 | high_imp<br>act   | 2.434 | medium_imp<br>act |
| 10 | Prima<br>ry             | Common in<br>primary and                         | 12:2090<br>5250 | SLC<br>O1C       | solute carrier organic anion transporter family,<br>member 1C1                                        | ENST0<br>00005          | ENSP00<br>0004445       | 559  | S/<br>F | tCt/t<br>t  | rs648<br>7138  | 0<br>0 | 0.2<br>35 | NA<br>2.306    | high_im<br>pact       | 0.047 | medium_i<br>mpact | NA    | NA                |

|    |        |               |         |     |       |         |     |    |       |       |   |     |       |       |         |        |          |            |
|----|--------|---------------|---------|-----|-------|---------|-----|----|-------|-------|---|-----|-------|-------|---------|--------|----------|------------|
|    | tumor  | metastatic    | 1       |     | 45102 | 27      |     |    |       |       |   |     |       |       |         |        |          |            |
|    |        | tumors        |         |     |       |         |     |    |       |       |   |     |       |       |         |        |          |            |
|    | Liver  | Common in     |         |     |       |         |     |    |       |       |   |     |       |       |         |        |          |            |
| 10 | metas  | primary and   | 12:2090 | SLC | ENST0 | ENSP00  |     |    |       |       |   |     |       |       |         |        |          |            |
|    | tases  | metastatic    | 5250    | O1C | 00005 | 0004441 | 677 | S/ | tCt/t | rs648 | 0 | 0.2 | NA    | 2.306 | high_im | 0.047  | medium_i | NA         |
|    | tumors | tumors        |         | 1   | 45604 | 49      |     | F  | t     | 7138  | 0 | 35  |       |       | pact    | 0.047  | mpact    | NA         |
|    | Prima  | Private in    | 2:46986 | SO  | ENST0 | ENSP00  |     |    |       |       |   |     |       |       |         |        |          |            |
| 10 | ry     | primary tumor | 987     | CS5 | 00003 | 0003051 | 440 | D/ | Gac/  | -     | 0 | 0.9 | 2.56  | 2.057 | high_im | 1.326  | medium_i | 1.683      |
|    | tumor  | tumors        |         |     | 06503 | 33      |     | N  | Aac   |       | 0 | 96  |       |       | pact    | 1.326  | mpact    | act        |
|    | Prima  | Common in     |         |     |       |         |     |    |       |       |   |     |       |       |         |        |          |            |
| 10 | ry     | primary and   | 12:2379 | SO  | ENST0 | ENSP00  |     |    |       |       |   |     |       |       |         |        |          |            |
|    | tumor  | metastatic    | 3778    | X5  | 00005 | 0004419 | 316 | A/ | Gca/  | -     | 0 | 0.9 | NA    | 0.434 | m_imp   | 1.621  | high_imp | NA         |
|    | tumors | tumors        |         |     | 41536 | 73      |     | T  | Aca   |       | 0 | 97  |       |       | act     | 1.621  | ct       | NA         |
|    | Liver  | Common in     |         |     |       |         |     |    |       |       |   |     |       |       |         |        |          |            |
| 10 | metas  | primary and   | 12:2379 | SO  | ENST0 | ENSP00  |     |    |       |       |   |     |       |       |         |        |          |            |
|    | tases  | metastatic    | 3778    | X5  | 00005 | 0004398 | 294 | A/ | Gca/  | -     | 0 | 0.9 | NA    | 0.823 | m_imp   | 1.72   | high_imp | NA         |
|    | tumors | tumors        |         |     | 37393 | 32      |     | T  | Aca   |       | 0 | 98  |       |       | act     | 1.72   | ct       | NA         |
|    | Liver  | Private in    |         |     |       |         |     |    |       |       |   |     |       |       |         |        |          |            |
| 10 | metas  | metastatic    | 2:32288 | SPA | ENST0 | ENSP00  |     |    |       |       |   |     |       |       |         |        |          |            |
|    | tases  | tumor         | 989     | ST  | 00003 | 0003208 | 30  | A/ | gCc/  | -     | 0 | 0   | 0     | 2.243 | high_im | -1.127 | low_imp  | -0.973     |
|    | tumors | tumors        |         |     | 15285 | 85      |     | D  | gAc   |       | 0 | 0   |       |       | pact    | -1.127 | ct       | low_impact |
|    | Prima  | Common in     |         |     |       |         |     |    |       |       |   |     |       |       |         |        |          |            |
| 10 | ry     | primary and   | 1:48764 | SPA | ENST0 | ENSP00  |     |    |       |       |   |     |       |       |         |        |          |            |
|    | tumor  | metastatic    | 419     | TA6 | 00003 | 0003795 | 406 | C/ | tGt/t | rs105 | 0 | 0.9 | NA    | 2.929 | high_im | 0.786  | medium_i | NA         |
|    | tumors | tumors        |         |     | 96199 | 02      |     | Y  | At    | 6042  | 0 | 48  |       |       | pact    | 0.786  | mpact    | NA         |
|    | Liver  | Common in     |         |     |       |         |     |    |       |       |   |     |       |       |         |        |          |            |
| 10 | metas  | primary and   | 1:48764 | SPA | ENST0 | ENSP00  |     |    |       |       |   |     |       |       |         |        |          |            |
|    | tases  | metastatic    | 419     | TA6 | 00003 | 0003795 | 406 | C/ | tGt/t | rs105 | 0 | 0.9 | NA    | 2.929 | high_im | 0.786  | medium_i | NA         |
|    | tumors | tumors        |         |     | 96199 | 02      |     | Y  | At    | 6042  | 0 | 48  |       |       | pact    | 0.786  | mpact    | NA         |
|    | Prima  | Common in     |         |     |       |         |     |    |       |       |   |     |       |       |         |        |          |            |
| 10 | ry     | primary and   | 20:4435 | SPI | ENST0 | ENSP00  |     |    |       |       |   |     |       |       |         |        |          |            |
|    | tumor  | tumors        | 2620    | NT4 | 00002 | 0002790 | 73  | G/ | Ggc/  | rs601 | 0 | 0.9 | 3.515 | 2.079 | high_im | 1.922  | high_imp | 2.285      |
|    | tumors | tumors        |         |     |       |         |     | S  | Agc   | 7667  | 0 | 99  |       |       | pact    | 1.922  | ct       | act        |

|    |       |               |         |     |                                           |       |         |     |    |        |       |   |     |       |       |          |       |               |       |               |
|----|-------|---------------|---------|-----|-------------------------------------------|-------|---------|-----|----|--------|-------|---|-----|-------|-------|----------|-------|---------------|-------|---------------|
|    | tumor | metastatic    |         |     |                                           | 79058 | 58      |     |    |        |       |   |     |       |       |          |       |               |       |               |
|    |       | tumors        |         |     |                                           |       |         |     |    |        |       |   |     |       |       |          |       |               |       |               |
|    | Liver | Common in     |         |     |                                           | ENST0 | ENSP00  |     |    |        |       |   |     |       |       |          |       |               |       |               |
| 10 | metas | primary and   | 20:4435 | SPI | serine peptidase inhibitor, Kunitz type 4 | 00002 | 0002790 | 73  | G/ | Ggc/   | rs601 | 0 | 0.9 | 3.515 | 2.079 | high_im  | 1.922 | high_impact   | 2.285 | medium_impact |
|    | tases | metastatic    | 2620    | NT4 |                                           |       |         |     | S  | Agc    | 7667  | 0 | 99  |       |       | pact     |       | ct            |       | act           |
|    |       | tumors        |         |     |                                           | 79058 | 58      |     |    |        |       |   |     |       |       |          |       |               |       |               |
|    | Liver | Private in    |         |     |                                           | ENST0 | ENSP00  |     |    |        |       |   |     |       |       |          |       |               |       |               |
| 10 | metas | metastatic    | X:48054 | SSX | synovial sarcoma, X breakpoint 5          | 00003 | 0003124 | 19  | E/ | Gag/   | rs482 | 0 | 0.5 | NA    | 2.084 | high_im  | 0.307 | medium_impact | NA    | NA            |
|    | tases | tumor         | 740     | 5   |                                           |       |         |     | Q  | Cag    | 4675  | 0 | 52  |       |       | pact     |       | mpact         |       |               |
|    |       | tumors        |         |     |                                           | 11798 | 15      |     |    |        |       |   |     |       |       |          |       |               |       |               |
|    | Prima | Common in     |         |     |                                           | ENST0 | ENSP00  |     |    |        |       | 0 |     |       |       |          |       |               |       |               |
| 10 | ry    | primary and   | 19:1912 | SU  | SURP and G patch domain containing 2      | 00003 | 0003379 | 639 | R/ | cGg/   | rs116 | . | 0.9 |       |       | mediu    |       | high_impact   |       |               |
|    | tumor | metastatic    | 1086    | GP2 |                                           |       |         |     | Q  | cAg    | 95341 | 0 | 99  | 0.975 | 0.843 | m_impact | 1.904 | ct            | -0.12 | low_impact    |
|    |       | tumors        |         |     |                                           | 37018 | 26      |     |    |        | 9     | 0 | 2   |       |       | act      |       |               |       |               |
|    | Liver | Common in     |         |     |                                           | ENST0 | ENSP00  |     |    |        |       | 0 |     |       |       |          |       |               |       |               |
| 10 | metas | primary and   | 19:1912 | SU  | SURP and G patch domain containing 2      | 00004 | 0003893 | 639 | R/ | cGg/   | rs116 | . | 0.9 |       |       | mediu    |       | high_impact   |       |               |
|    | tases | metastatic    | 1086    | GP2 |                                           |       |         |     | Q  | cAg    | 95341 | 0 | 99  | 0.975 | 0.843 | m_impact | 1.904 | ct            | -0.12 | low_impact    |
|    |       | tumors        |         |     |                                           | 52918 | 80      |     |    |        | 9     | 0 | 2   |       |       | act      |       |               |       |               |
|    | Prima | Common in     |         |     |                                           | ENST0 | ENSP00  |     |    |        |       | 0 |     |       |       |          |       |               |       |               |
| 10 | ry    | primary and   | 11:1858 | SYT | synaptotagmin VIII                        | 00003 | 0003436 | 289 | T/ | aCg/   | rs484 | 0 | 1   | NA    | 2.062 | high_im  | 1.894 | high_impact   | NA    | NA            |
|    | tumor | metastatic    | 262     | 8   |                                           |       |         |     | M  | aTg    | 955   | 0 |     |       |       | pact     |       | ct            |       |               |
|    |       | tumors        |         |     |                                           | 41958 | 91      |     |    |        |       |   |     |       |       |          |       |               |       |               |
|    | Liver | Common in     |         |     |                                           | ENST0 | ENSP00  |     |    |        |       |   |     |       |       |          |       |               |       |               |
| 10 | metas | primary and   | 11:1858 | SYT | synaptotagmin VIII                        | 00003 | 0003714 | 302 | T/ | aCg/   | rs484 | 0 | 0.6 | NA    | 2.062 | high_im  | 0.365 | medium_impact | NA    | NA            |
|    | tases | metastatic    | 262     | 8   |                                           |       |         |     | M  | aTg    | 955   | 0 | 58  |       |       | pact     |       | mpact         |       |               |
|    |       | tumors        |         |     |                                           | 81978 | 06      |     |    |        |       |   |     |       |       |          |       |               |       |               |
|    | Prima | Private in    | 6:15946 | TAG | T-cell activation RhoGTPase activating    | ENST0 | ENSP00  |     |    |        |       | 0 |     |       |       |          |       |               |       |               |
| 10 | ry    | primary tumor | 3270    | AP  | protein                                   | 00003 | 0003560 | 52  | K/ | aAg/   | -     | . | 0.9 | 1.1   | 1.174 | mediu    |       | high_impact   | 0.096 | low_impact    |
|    | tumor |               |         |     |                                           |       |         |     | M  | aTg    |       | 0 | 99  |       |       | m_impact | 1.963 | ct            |       |               |
|    |       |               |         |     |                                           | 67066 | 33      |     |    |        |       | 0 | 1   |       |       | act      |       |               |       |               |
| 10 | Prima | Common in     | 1:12687 | TAS | taste receptor, type 1, member 3          | ENST0 | ENSP00  | 514 | F/ | ttC/tt | -     | 0 | 0.9 | 1.565 | 0.02  | mediu    | 1.652 | high_impact   | 0.308 | low_impact    |

|    |       |             |         |     |                                               |       |         |      |    |        |       |     |     |       |       |         |          |          |       |            |
|----|-------|-------------|---------|-----|-----------------------------------------------|-------|---------|------|----|--------|-------|-----|-----|-------|-------|---------|----------|----------|-------|------------|
|    | ry    | primary and | 01      | 1R3 |                                               | 00003 | 0003444 |      | L  | G      | .     | 99  |     |       | m_imp |         | ct       |          |       |            |
|    | tumor | metastatic  |         |     |                                               | 39381 | 11      |      |    |        |       | 1   |     |       | act   |         |          |          |       |            |
|    |       | tumors      |         |     |                                               |       |         |      |    |        |       | 2   |     |       |       |         |          |          |       |            |
|    | Liver | Common in   |         |     |                                               | ENST0 | ENSP00  |      |    |        |       | 0   |     |       | mediu |         |          |          |       |            |
| 10 | metas | primary and | 1:12687 | TAS | taste receptor, type 1, member 3              | 00003 | 0003444 | 514  | F/ | ttC/tt | .     | 0.9 |     |       |       |         | high_imp |          |       |            |
|    | tases | metastatic  | 01      | 1R3 |                                               | 39381 | 11      |      | L  | G      | -     | 1   | 99  | 1.565 | 0.02  | m_imp   | 1.652    | ct       | 0.308 | low_impact |
|    |       | tumors      |         |     |                                               |       |         |      |    |        |       | 2   |     |       |       |         |          |          |       |            |
|    | Prima | Common in   |         |     |                                               | ENST0 | ENSP00  |      |    |        |       |     |     |       |       |         |          |          |       |            |
| 10 | ry    | primary and | 1:36550 | TEK | tektin 2 (testicular)                         | 00004 | 0004341 | 46   | R/ | Cgc/   | rs120 | 0   | 0.9 |       |       | high_im |          | high_imp |       |            |
|    | tumor | metastatic  | 658     | T2  |                                               | 69024 | 83      |      | C  | Tgc    | 43423 | 0   | 99  | NA    | 2.929 | pact    | 1.787    | ct       | NA    | NA         |
|    |       | tumors      |         |     |                                               |       |         |      |    |        |       |     |     |       |       |         |          |          |       |            |
|    | Liver | Common in   |         |     |                                               | ENST0 | ENSP00  |      |    |        |       |     |     |       |       |         |          |          |       |            |
| 10 | metas | primary and | 1:36550 | TEK | tektin 2 (testicular)                         | 00004 | 0004341 | 46   | R/ | Cgc/   | rs120 | 0   | 0.9 |       |       | high_im |          | high_imp |       |            |
|    | tases | metastatic  | 658     | T2  |                                               | 69024 | 83      |      | C  | Tgc    | 43423 | 0   | 99  | NA    | 2.929 | pact    | 1.787    | ct       | NA    | NA         |
|    |       | tumors      |         |     |                                               |       |         |      |    |        |       |     |     |       |       |         |          |          |       |            |
|    | Liver | Private in  |         |     |                                               | ENST0 | ENSP00  |      |    |        |       |     |     |       |       |         |          |          |       |            |
| 10 | metas | metastatic  | 1:92161 | TGF | transforming growth factor, beta receptor III | 00004 | 0004326 | 786  | V/ | Gtg/   | -     | 0   | 0.9 |       |       | high_im |          | medium_i |       |            |
|    | tases | tumor       | 307     | BR3 |                                               | 65892 | 38      |      | M  | Atg    | -     | 0   | 98  | NA    | 2.318 | pact    | 1.468    | mpact    | NA    | NA         |
|    |       | tumors      |         |     |                                               |       |         |      |    |        |       |     |     |       |       |         |          |          |       |            |
|    | Liver | Private in  |         |     |                                               | ENST0 | ENSP00  |      |    |        |       |     |     |       |       |         |          |          |       |            |
| 10 | metas | metastatic  | 6:32064 | TNX | tenascin XB                                   | 00003 | 0003643 | 420  | V/ | Gtg/   | -     | 0   | 0.9 |       |       | high_im |          | medium_i |       |            |
|    | tases | tumor       | 372     | B   |                                               | 75247 | 96      |      | M  | Atg    | -     | 0   | 74  | NA    | 2.031 | pact    | 1.021    | mpact    | NA    | NA         |
|    |       | tumors      |         |     |                                               |       |         |      |    |        |       |     |     |       |       |         |          |          |       |            |
|    | Prima | Common in   |         |     |                                               | ENST0 | ENSP00  |      |    |        |       |     |     |       |       |         |          |          |       |            |
| 10 | ry    | primary and | 14:2150 | TPP | tubulin polymerization-promoting protein      | 00005 | 0004353 | 133  | R/ | cGc/   | rs962 | 0   | 0.9 |       |       | high_im |          | high_imp |       |            |
|    | tumor | metastatic  | 0121    | P2  | family member 2                               | 30140 | 56      |      | L  | cTc    | 4     | 0   | 99  | NA    | 2.929 | pact    | 1.787    | ct       | NA    | NA         |
|    |       | tumors      |         |     |                                               |       |         |      |    |        |       |     |     |       |       |         |          |          |       |            |
|    | Liver | Common in   |         |     |                                               | ENST0 | ENSP00  |      |    |        |       |     |     |       |       |         |          |          |       |            |
| 10 | metas | primary and | 14:2150 | TPP | tubulin polymerization-promoting protein      | 00003 | 0003175 | 133  | R/ | cGc/   | rs962 | 0   | 0.9 | 3.455 | 2.929 | high_im |          | high_imp |       |            |
|    | tases | metastatic  | 0121    | P2  | family member 2                               | 21760 | 95      |      | L  | cTc    | 4     | 0   | 99  |       |       | pact    | 1.787    | ct       | 2.795 | medium_imp |
|    |       | tumors      |         |     |                                               |       |         |      |    |        |       |     |     |       |       |         |          |          |       |            |
| 10 | Prima | Private in  | 3:36872 | TRA | tetratricopeptide repeat and ankyrin repeat   | ENST0 | ENSP00  | 2716 | K/ | Aaa/   | -     | 0   | 0.9 | NA    | 2.175 | high_im | 1.282    | medium_i | NA    | NA         |

|    |       |               |         |     |                                                                    |       |         |     |    |       |       |   |     |      |       |          |        |               |        |             |
|----|-------|---------------|---------|-----|--------------------------------------------------------------------|-------|---------|-----|----|-------|-------|---|-----|------|-------|----------|--------|---------------|--------|-------------|
|    | ry    | primary tumor | 796     | NK1 | containing 1                                                       | 00004 | 0004161 |     | Q  | Caa   |       |   | 89  |      |       | pact     |        | mpact         |        |             |
|    | tumor |               |         |     |                                                                    | 29976 | 68      |     |    |       |       |   |     |      |       |          |        |               |        |             |
| 10 | Prima | Common in     |         |     |                                                                    | ENST0 | ENSP00  |     |    |       |       |   |     |      |       |          |        |               |        |             |
|    | ry    | primary and   | 8:14146 | TRA |                                                                    | 00003 | 0003739 | 167 | G/ | gGt/g | -     | 0 | 0.9 | NA   | 2.929 | high_im  | 1.787  | high_impact   | NA     | NA          |
|    | tumor | metastatic    | 1267    | PPC | trafficking protein particle complex 9                             | 89328 | 79      |     | A  | Ct    |       |   | 99  |      |       | pact     |        | ct            |        |             |
|    | tumor | tumors        |         |     |                                                                    |       |         |     |    |       |       |   |     |      |       |          |        |               |        |             |
| 10 | Liver | Common in     |         |     |                                                                    | ENST0 | ENSP00  |     |    |       |       |   |     |      |       |          |        |               |        |             |
|    | metas | primary and   | 8:14146 | TRA |                                                                    | 00003 | 0003739 | 69  | G/ | gGt/g | -     | 0 | 0.9 | NA   | 2.929 | high_im  | 1.613  | high_impact   | NA     | NA          |
|    | tases | metastatic    | 1267    | PPC | trafficking protein particle complex 9                             | 89327 | 78      |     | A  | Ct    |       |   | 98  |      |       | pact     |        | ct            |        |             |
|    | tases | tumors        |         |     |                                                                    |       |         |     |    |       |       |   |     |      |       |          |        |               |        |             |
| 10 | Liver | Private in    |         |     |                                                                    | ENST0 | ENSP00  |     |    |       |       |   | 0   |      |       |          |        |               |        |             |
|    | metas | metastatic    | 5:18066 | TRI | tripartite motif containing 41                                     | 00004 | 0003944 | 178 | G/ | Ggc/  | -     | . | 0.9 | NA   | 0.764 | mediu    | 1.573  | high_impact   | NA     | NA          |
|    | tases | tumor         | 1359    | M41 |                                                                    | 38174 | 59      |     | S  | Agc   |       | 0 | 96  |      |       | m_impact |        | ct            |        |             |
|    | tases | tumor         |         |     |                                                                    |       |         |     |    |       |       | 2 |     |      |       |          |        |               |        |             |
| 10 | Liver | Private in    |         |     |                                                                    | ENST0 | ENSP00  |     |    |       |       |   | 0   |      |       |          |        |               |        |             |
|    | metas | metastatic    | 3:32859 | TRI | tripartite motif containing 71                                     | 00003 | 0003732 | 18  | M/ | aTg/  | -     | 0 | 0   | 0.55 | 2.069 | high_im  | -1.491 | low_impact    | -0.477 | low_impact  |
|    | tases | tumor         | 625     | M71 |                                                                    | 83763 | 72      |     | R  | aGg   |       |   |     |      |       | pact     |        | ct            |        |             |
|    | tases | tumor         |         |     |                                                                    |       |         |     |    |       |       |   |     |      |       |          |        |               |        |             |
| 10 | Prima | Private in    |         |     |                                                                    | ENST0 | ENSP00  |     |    |       |       |   | 0   |      |       |          |        |               |        |             |
|    | ry    | primary tumor | 21:4584 | TRP | transient receptor potential cation channel, subfamily M, member 2 | 00005 | 0004391 | 60  | D/ | Gac/  | -     | . | 0.9 | NA   | -0.23 | low_im   | 1.713  | high_impact   | NA     | NA          |
|    | tumor | primary tumor | 6591    | M2  |                                                                    | 40347 | 61      |     | N  | Aac   |       | 3 | 55  |      | 1     | pact     |        | ct            |        |             |
|    | tumor | primary tumor |         |     |                                                                    |       |         |     |    |       |       | 8 |     |      |       |          |        |               |        |             |
| 10 | Prima | Private in    |         |     |                                                                    | ENST0 | ENSP00  |     |    |       |       |   | 0   |      |       |          |        |               |        |             |
|    | ry    | primary tumor | 15:5090 | TRP | transient receptor potential cation channel, subfamily M, member 7 | 00003 | 0003202 | 736 | H/ | Cac/  | -     | 0 | 0.9 | 3.22 | 2.197 | high_im  | 0.982  | medium_impact | 3.408  | high_impact |
|    | tumor | primary tumor | 3364    | M7  |                                                                    | 13478 | 39      |     | D  | Gac   |       |   | 76  |      |       | pact     |        | mpact         |        |             |
|    | tumor | primary tumor |         |     |                                                                    |       |         |     |    |       |       |   |     |      |       |          |        |               |        |             |
| 10 | Prima | Private in    |         |     |                                                                    | ENST0 | ENSP00  |     |    |       |       |   | 0   |      |       |          |        |               |        |             |
|    | ry    | primary tumor | 5:13422 | TXN | thioredoxin domain containing 15                                   | 00005 | 0004244 | 158 | V/ | Gtg/  | rs792 | 0 | 0.6 | NA   | 2.929 | high_im  | 0.258  | medium_impact | NA     | NA          |
|    | tumor | primary tumor | 3804    | DC1 |                                                                    | 08810 | 28      |     | L  | Ctg   | 62456 |   | 88  |      |       | pact     |        | mpact         |        |             |
|    | tumor | primary tumor |         |     |                                                                    |       |         |     |    |       |       |   |     |      |       |          |        |               |        |             |
| 10 | Prima | Private in    |         |     |                                                                    | ENST0 | ENSP00  |     |    |       |       |   | 0   |      |       |          |        |               |        |             |
|    | ry    | primary tumor | 15:6231 | VPS | vacuolar protein sorting 13 homolog C (S. cerevisiae)              | 00002 | 0002615 | 153 | R/ | cGt/c | rs125 | 0 | 0.9 | 0.69 | 2.929 | high_im  | 1.299  | medium_impact | -0.232 | low_impact  |
|    | tumor | primary tumor | 6035    | 13C |                                                                    | 61517 | 17      |     | H  | At    | 95158 |   | 93  |      |       | pact     |        | mpact         |        |             |

|    |                  |                                         |                  |            |                                                       |                         |                         |      |         |             |                     |        |           |        |            |                   |        |             |        |               |
|----|------------------|-----------------------------------------|------------------|------------|-------------------------------------------------------|-------------------------|-------------------------|------|---------|-------------|---------------------|--------|-----------|--------|------------|-------------------|--------|-------------|--------|---------------|
| 10 | Liver metastases | Private in metastatic tumor             | 7:73085<br>699   | VPS<br>37D | vacuolar protein sorting 37 homolog D (S. cerevisiae) | ENST0<br>00004<br>51519 | ENSP00<br>0004133<br>37 | 165  | H/<br>P | cAc/c<br>Cc | -<br>-              | 0<br>0 | 0.3<br>02 | NA     | 2.929      | high_im<br>pact   | -0.149 | low_impact  | NA     | NA            |
| 10 | Liver metastases | Private in metastatic tumor             | 3:18454<br>2548  | VPS<br>8   | vacuolar protein sorting 8 homolog (S. cerevisiae)    | ENST0<br>00004<br>24721 | ENSP00<br>0003975<br>53 | 43   | K/<br>R | aAg/<br>aGg | rs117<br>99859<br>8 | 0<br>0 | 0.2<br>54 | NA     | 2.117      | high_im<br>pact   | -0.057 | low_impact  | NA     | NA            |
| 10 | Liver metastases | Private in metastatic tumor             | 12:1185<br>11726 | VSI<br>G10 | V-set and immunoglobulin domain containing 10         | ENST0<br>00003<br>59236 | ENSP00<br>0003521<br>72 | 333  | V/<br>M | Gtg/<br>Atg | rs966<br>8527       | 0<br>1 | 0.9<br>96 | 2.81   | 0.178      | mediu<br>m_impact | 1.554  | high_impact | 1.88   | medium_impact |
| 10 | Primary tumor    | Private in primary tumor                | 19:7685<br>441   | XAB<br>2   | XPA binding protein 2                                 | ENST0<br>00005<br>34844 | ENSP00<br>0004382<br>25 | 693  | D/<br>H | Gac/<br>Cac | -<br>-              | 0<br>0 | 0.9<br>98 | NA     | 0.571      | mediu<br>m_impact | 1.724  | high_impact | NA     | NA            |
| 10 | Primary tumor    | Common in primary and metastatic tumors | 14:2399<br>4804  | ZFH<br>X2  | zinc finger homeobox 2                                | ENST0<br>00004<br>19474 | ENSP00<br>0004134<br>18 | 1449 | F/<br>L | ttT/tt<br>G | -<br>-              | 0<br>0 | 0<br>0    | 2.11   | 2.056      | high_im<br>pact   | -1.54  | low_impact  | 1.031  | medium_impact |
| 10 | Liver metastases | Common in primary and metastatic tumors | 14:2399<br>4804  | ZFH<br>X2  | zinc finger homeobox 2                                | ENST0<br>00004<br>19474 | ENSP00<br>0004134<br>18 | 1449 | F/<br>L | ttT/tt<br>G | -<br>-              | 0<br>0 | 0<br>0    | 2.11   | 2.056      | high_im<br>pact   | -1.54  | low_impact  | 1.031  | medium_impact |
| 10 | Primary tumor    | Common in primary and metastatic tumors | 19:5361<br>2720  | ZNF<br>415 | zinc finger protein 415                               | ENST0<br>00004<br>48501 | ENSP00<br>0003964<br>92 | 241  | Y/<br>C | tAt/t<br>Gt | rs156<br>0099       | 1<br>0 | 0.9<br>95 | -1.345 | -3.41<br>4 | low_im<br>pact    | 1.586  | high_impact | -2.233 | low_impact    |
| 10 | Liver metastases | Common in primary and metastatic tumors | 19:5361<br>2720  | ZNF<br>415 | zinc finger protein 415                               | ENST0<br>00004<br>40291 | ENSP00<br>0004146<br>01 | 180  | Y/<br>C | tAt/t<br>Gt | rs156<br>0099       | 1<br>0 | 0.9<br>98 | NA     | -3.41<br>4 | low_im<br>pact    | 1.818  | high_impact | NA     | NA            |
| 10 | Primary tumor    | Private in                              | 20:6259          | ZNF        | zinc finger protein 512B                              | ENST0                   | ENSP00                  | 651  | S/      | tCg/t       | -                   | 0      | 0.8       | 1.7    | 2.064      | high_im           | 0.783  | medium_i    | 0.687  | low_impact    |



|    |        |               |         |     |                                          |       |         |     |    |       |       |    |     |      |       |         |       |          |        |            |
|----|--------|---------------|---------|-----|------------------------------------------|-------|---------|-----|----|-------|-------|----|-----|------|-------|---------|-------|----------|--------|------------|
|    | ry     | primary tumor | 4464    | 512 |                                          | 00004 | 0003937 |     | L  | Tg    |       | 89 |     |      | pact  |         | mpact |          |        |            |
|    | tumor  |               |         | B   |                                          | 50537 | 95      |     |    |       |       |    |     |      |       |         |       |          |        |            |
|    | Prima  |               |         |     |                                          | ENST0 | ENSP00  |     |    |       |       |    |     |      |       |         |       |          |        |            |
| 10 | ry     | Private in    | 3:75787 | ZNF | zinc finger protein 717                  | 00004 | 0004193 | 335 | H/ | cAt/c | rs757 | 0  | 0.5 | NA   | 2.084 | high_im | 0.29  | medium_i | NA     | NA         |
|    | tumor  | primary tumor | 620     | 717 |                                          | 78296 | 77      |     | R  | Gt    | 37034 |    | 36  |      | pact  |         | mpact |          |        |            |
|    | Prima  | Common in     |         |     |                                          | ENST0 | ENSP00  |     |    |       |       |    |     |      |       |         |       |          |        |            |
| 10 | ry     | primary and   | 9:99580 | ZNF | zinc finger protein 782                  | 00004 | 0004193 | 491 | S/ | Tca/  | rs759 | 0  | 0.6 | 0.87 | 2.084 | high_im | 0.407 | medium_i | -0.179 | low_impact |
|    | tumor  | metastatic    | 834     | 782 |                                          | 81138 | 97      |     | A  | Gca   | 89782 |    | 47  |      | pact  |         | mpact |          |        |            |
|    | tumor  | tumors        |         |     |                                          |       |         |     |    |       |       |    |     |      |       |         |       |          |        |            |
|    | Liver  | Common in     |         |     |                                          | ENST0 | ENSP00  |     |    |       |       |    |     |      |       |         |       |          |        |            |
| 10 | metas  | primary and   | 9:99580 | ZNF | zinc finger protein 782                  | 00004 | 0004193 | 491 | S/ | Tca/  | rs759 | 0  | 0.6 | 0.87 | 2.084 | high_im | 0.407 | medium_i | -0.179 | low_impact |
|    | tases  | metastatic    | 834     | 782 |                                          | 81138 | 97      |     | A  | Gca   | 89782 |    | 47  |      | pact  |         | mpact |          |        |            |
|    | tumors | tumors        |         |     |                                          |       |         |     |    |       |       |    |     |      |       |         |       |          |        |            |
|    | Prima  |               |         |     |                                          | ENST0 | ENSP00  |     |    |       |       |    |     |      |       |         |       |          |        |            |
| 10 | ry     | Private in    | 19:5854 | ZSC | zinc finger and SCAN domain containing 1 | 00003 | 0003755 | 103 | P/ | Ccc/  | -     | 0  | 0.9 | NA   | 2.066 | high_im | 1.181 | medium_i | NA     | NA         |
|    | tumor  | primary tumor | 9511    | AN1 |                                          | 91700 | 81      |     | S  | Tcc   |       |    | 78  |      | pact  |         | mpact |          |        |            |

**Table S3. Summary of searching results for metastases related genes in GeneRIF database**

| Gene symbol | Gene ID | Pubmed ID | GeneRIF text                                                                                                                                                                                                                                   |
|-------------|---------|-----------|------------------------------------------------------------------------------------------------------------------------------------------------------------------------------------------------------------------------------------------------|
| ACTN4       | 81      | 15493875  | Actinin alpha-4 is mainly present intracellularly and is involved in cellular motility via interaction with the actin cytoskeleton, thus probably affecting the metastatic potential of tumor cells.                                           |
| ACTN4       | 81      | 18362906  | Motility-related ACTN4 is associated with advanced and metastatic ovarian carcinoma.                                                                                                                                                           |
| ACTN4       | 81      | 18765526  | Actinin-4 contributes to the invasive growth of pancreatic ductal carcinoma, and ACTN4 is one of the candidate oncogenes in this chromosome locus.                                                                                             |
| ACTN4       | 81      | 19913389  | expression of alpha-actinin-4 was significantly associated with invasion potential defined by the Matrigel invasion assay. Cancer cell lines with higher alpha-actinin-4 expression had greater invasive potential.                            |
| ACTN4       | 81      | 23810014  | Data suggest that ACTN4 plays roles in breast cancer tumorigenesis via promotion of cell proliferation, metastasis, and drug resistance.                                                                                                       |
| ACTN4       | 81      | 23817592  | Increased expression of ACTN4 is associated with invasiveness of bladder cancer.                                                                                                                                                               |
| ALOX12      | 239     | 14669797  | our data suggest that an increase in 12-LOX expression enhances the metastatic potential of human prostate cancer cells.                                                                                                                       |
| ALOX12      | 239     | 22237009  | 12(S)-LOX expression in inflammatory areas of colorectal tumours has the capacity to induce an invasive phenotype in colorectal cancer cells and could be targeted for therapy.                                                                |
| APC         | 324     | 11921277  | Three APC mutations have been identified in 22 tested samples, all of them in xenografts developed from metastatic prostate tumors.                                                                                                            |
| APC         | 324     | 12800196  | APC inactivation due to mutations, LOH and methylation is associated with invasive and in situ lobular breast cancer.                                                                                                                          |
| APC         | 324     | 15832580  | The APC mutations associated with desmoid tumors and responsible for the behavior of the invasiveness of these neoplasms.                                                                                                                      |
| APC         | 324     | 17653897  | A nonsense mutation in Arg1114X in the APC gene was found in 5 of 43 colorectal cancer patients. The patients also had higher rates of metastasis.                                                                                             |
| APC         | 324     | 18844223  | adenomatous polyposis coli gene and nuclear b-catenin may have roles in wnt-related progression of invasive urothelial carcinomas                                                                                                              |
| APC         | 324     | 21302450  | Higher rates of the expressions of both APC and c-Myc proteins in non-small cell lung cancer primary foci were found compared with those in lymph node metastases.                                                                             |
| APC         | 324     | 23302090  | Membrane protrusions with APC/beta-catenin-containing puncta control the migratory potential and mesenchymal morphology of mammary tumor cells.                                                                                                |
| APC         | 324     | 23393221  | CDX2 activated APC and AXIN2 promoter activities via intestinal cell-specific enhancer elements; results suggest that a low CDX2 level has influence on the Wnt signaling in invasive colon cancer cells possibly promoting cellular migration |
| APC         | 324     | 24197976  | The methylated pattern of APC promoter 1A was detected in 43.8% of gastric adenocarcinoma cases and correlated with T-stage (P = 0.046) and distant metastasis                                                                                 |
| PRDM1       | 639     | 19433448  | the induction of Blimp1 represents a novel mechanism whereby the RelB NF-kappaB subunit mediates repression, specifically of ERalpha, thereby promoting a more migratory phenotype in breast cancer cells                                      |
| PRDM1       | 639     | 22438909  | Blimp1 is a mediator of Ras/Raf/AP-1 signaling that promotes cell migration, and is repressed by LOX-PP in lung cancer.                                                                                                                        |
| BRCA1       | 672     | 15009718  | BRCA1 downregulation in melanoma cells did not make them more aggressive and could lead to new therapeutic strategies for this tumor, which is so difficult to control once metastasized.                                                      |

|       |     |          |                                                                                                                                                                                                                                                          |
|-------|-----|----------|----------------------------------------------------------------------------------------------------------------------------------------------------------------------------------------------------------------------------------------------------------|
| BRCA1 | 672 | 16011248 | nm23H1 protein could effectively restrain gastric cancer metastasis and development; and BRCA1 protein could restrain tumor from becoming lower differentiation.                                                                                         |
| BRCA1 | 672 | 16944270 | Nineteen percent of the women who developed both invasive breast and ovarian tumors carried one of the analyzed BRCA1 gene mutations but none of the women were positive for the analyzed BRCA2 mutation.                                                |
| BRCA1 | 672 | 17952592 | The site of first distant metastasis is different between BRCA1- and BRCA2-associated and sporadic breast cancer patients.                                                                                                                               |
| BRCA1 | 672 | 19012002 | Studied BRCA1 and BRCA2 exp'n in young breast cancer patients;BRCA1 & BRCA2 expression correlated in healthy, but not in tumor tissues. Neither BRCA1 nor BRCA2 exp'n was assoc'd with tumor histology, diff'n, nodal metastasis or p53 and HER-2 exp'n. |
| BRCA1 | 672 | 19098453 | study demonstrates that BRCA1 controls cell motility and invasion through its regulation of several key genes which are crucial in the progression of breast cancer                                                                                      |
| BRCA1 | 672 | 19644562 | BRCA1 methylation correlated with age at diagnosis (P = .015) and 5-years disease free survival (P = .016) while hMLH1 methylation was more frequent in larger tumors (P = .002) and in presence of distant metastasis (P = .004).                       |
| BRCA1 | 672 | 19885732 | In this prospective study of women who were unaffected at the time of genetic testing and who were negative for the known familial mutation in BRCA1/2, no excess risk of invasive breast cancer was observed.                                           |
| BRCA1 | 672 | 20038817 | loss of BRCA1 function may contribute to the aggressiveness of Ras-MAPK driven breast cancer with associated increase in levels of cyclin D1 and c-myc, enhanced MAPK activity, angiogenic potential & invasiveness                                      |
| BRCA1 | 672 | 20134318 | The prophylactic procedure is highly effective in preventing invasive breast cancer in BRCA1 mutation carriers                                                                                                                                           |
| BRCA1 | 672 | 20384635 | natural mutant allele of BRCA1 (Mut.BRCA1) can elicit some of the changes involved in metastatic progression in human breast cancer via the overexpression of osteopontin.                                                                               |
| BRCA1 | 672 | 20398395 | Lympho-vascular invasion is frequent in BRCA1 germline mutation related breast cancers, but seems to occur as often in sporadic controls matched for age, grade and tumor type.                                                                          |
| BRCA1 | 672 | 20406939 | Data extend the ovarian BRCAness phenotype, imply BRCA1/2-deficient ovarian cancer is biologically distinct, and suggest that patients with visceral metastases should be considered for BRCA1/2 sequencing.                                             |
| BRCA1 | 672 | 21080930 | study found no difference in the prevalence of loss of wt BRCA1 between ER+ and ER- invasive BRCA1-associated breast cancers                                                                                                                             |
| BRCA1 | 672 | 21324516 | BRCA1 and BRCA2 mutations are common in women with invasive ovarian cancer. All women diagnosed with invasive non-mucinous ovarian cancer should be considered to be candidates for genetic testing.                                                     |
| BRCA1 | 672 | 22274685 | Among patients with invasive epithelial ovarian cancer, having a germline mutation in BRCA1 or BRCA2 was associated with improved 5-year overall survival. BRCA2 carriers had the best prognosis.                                                        |
| BRCA1 | 672 | 22431556 | BRCA1/p220 loss of expression or function triggers BRCA1-IRIS overexpression through a post-transcriptional mechanism, which in turn promotes formation of aggressive and invasive breast tumors.                                                        |
| BRCA1 | 672 | 22710074 | Invasive tubal carcinoma and TIC were limited to BRCA-mutation carriers, whereas hyperplasia and minor epithelial atypia were commonly found in both BRCA-mutation carriers and controls.                                                                |
| BRCA1 | 672 | 22931600 | Decreased BRCA1 expression can enhance progesterone-stimulated tumor cell proliferation and migration in sporadic breast cancer.                                                                                                                         |

|       |     |          |                                                                                                                                                                                                                                                                 |
|-------|-----|----------|-----------------------------------------------------------------------------------------------------------------------------------------------------------------------------------------------------------------------------------------------------------------|
| BRCA1 | 672 | 23082475 | Sixty-two patients (index cases) with invasive breast cancer belonging to sixty families and their asymptomatic female first-degree relatives (300 cases) were studied for germline mutations of BRCA1 and BRCA2 genes.                                         |
| BRCA1 | 672 | 23257159 | for women with invasive ovarian cancer, the short-term survival advantage of carrying a BRCA1 or BRCA2 mutation does not lead to a long-term survival benefit                                                                                                   |
| BRCA1 | 672 | 23569316 | BRCA1/2 germ-line mutations confer a more aggressive prostate cancer phenotype with a higher probability of nodal involvement, distant metastasis and poor survival.                                                                                            |
| BRCA1 | 672 | 23860775 | Data indicate that patients negative for BRCA1 protein were more often with pathological tumor-node-metastasis stage III, positive for lymph node metastasis and MYC overexpression than BRCA1-positive tumors.                                                 |
| BRAF  | 673 | 12644542 | results demonstrate that the mutational status of BRAF and KRAS is distinctly different among histologic types of ovarian serous carcinoma, occurring most frequently in invasive micropapillary serous carcinomas and its precursors, serous borderline tumors |
| BRAF  | 673 | 15998781 | Role of BRAF mutation in facilitating metastasis and progression of papillary thyroid cancer in lymph nodes.                                                                                                                                                    |
| BRAF  | 673 | 16959844 | BRAFV600E activates not only MAPK but also NF-kappaB signaling pathway in human thyroid cancer cells, leading to an acquisition of apoptotic resistance and promotion of invasion.                                                                              |
| BRAF  | 673 | 17387744 | BRAF(V600E) mutation is identified in a subset of cutaneous metastases from papillary thyroid carcinomas                                                                                                                                                        |
| BRAF  | 673 | 18628356 | The frequencies of LOHs of 17q21, 17p13, 10q23, and 22q13 were higher in tumors with lymph node metastasis, suggesting that these LOHs may be important in increased lymph node metastasis.                                                                     |
| BRAF  | 673 | 19001320 | Wild-type BRAF is required for response to panitumumab or cetuximab in metastatic colorectal cancer.                                                                                                                                                            |
| BRAF  | 673 | 19014278 | In Korean patients with papillary thyroid carcinoma, the BRAFV600E mutation is associated with a lower frequency of background Hashimoto thyroiditis and a high frequency of lymph node metastasis.                                                             |
| BRAF  | 673 | 19079609 | Genetic extinction of BRAF(V600E) in established prostate tumors did not lead to tumor regression, indicating that while sufficient to initiate development of invasive prostate adenocarcinoma, BRAF(V600E) is not required for its maintenance.               |
| BRAF  | 673 | 19282104 | study of KRAS/BRAF mutation status in a large and well-documented cohort of primary and metastatic renal cell carcinoma                                                                                                                                         |
| BRAF  | 673 | 19355825 | BRAF(V600E) is associated some of the aggressive clinicopathological features of papillary thyroid carcinoma including younger age at diagnosis, larger tumor size, and classic histological type, as well as also extrathyroidal invasion.                     |
| BRAF  | 673 | 19571295 | study concludes that a BRAF mutation is a negative prognostic marker in patients with metastatic colorectal cancer                                                                                                                                              |
| BRAF  | 673 | 19584155 | Results suggest that the mutations of EGFR, KRAS, BRAF between primary tumors and corresponding lymph node metastases should be considered whenever mutations are used for the selection of patients for EGFR-directed tyrosine kinase inhibitor therapy.       |
| BRAF  | 673 | 19603018 | Assessing KRAS and BRAF mutations might help optimising the selection of the candidate metastatic colorectal cancer patients to receive anti-EGFR moAbs.                                                                                                        |
| BRAF  | 673 | 19603024 | BRAF (P=0.01) mutations predicted reduced progress free survival in response to cetuximab salvage therapy in patients with metastatic colorectal cancer .                                                                                                       |
| BRAF  | 673 | 19850689 | BRAF(T1799A) can be detected in the blood of papillary thyroid carcinoma patients with residual or metastatic disease and may provide diagnostic information                                                                                                    |
| BRAF  | 673 | 20049644 | BRAF mutations only in metastases is not associated with resistance to anti-EGFR treatment in primary colorectal tumors.                                                                                                                                        |

|      |     |          |                                                                                                                                                                                                                                                                 |
|------|-----|----------|-----------------------------------------------------------------------------------------------------------------------------------------------------------------------------------------------------------------------------------------------------------------|
| BRAF | 673 | 20498063 | Knockdown of B-Raf(V600E) resulted in thrombospondin-1 down-regulation and a reduction of adhesion and migration/invasion of human thyroid cancer cells.                                                                                                        |
| BRAF | 673 | 20619739 | if KRAS is not mutated, assessing BRAF, NRAS, and PIK3CA exon 20 mutations (in that order) gives additional information about the efficacy of cetuximab plus chemotherapy in metastatic colorectal cancer.                                                      |
| BRAF | 673 | 20631031 | No significant difference in BRAF alterations was found between pT1 tumors and thyroid capsule invasion and pT3 tumors.                                                                                                                                         |
| BRAF | 673 | 20645028 | samples of metastatic colorectal cancer were tested for the presence of the seven most common mutations in the KRAS gene and the V600E mutation in the BRAF gene                                                                                                |
| BRAF | 673 | 20857202 | BRAF V600E mutation is associated with lack of response in wild-type KRAS metastatic colorectal cancer treated with anti-EGFR monoclonal antibodies.                                                                                                            |
| BRAF | 673 | 21289333 | 803 metastatic colorectal cancer samples studied for KRAS exon 2 and BRAF exon 15 mutations; BRAF mutated samples were characterized for mismatch repair function; 344 tumours were mutated -34 involving BRAF mutations (8 of microsatellite instability type) |
| BRAF | 673 | 21456008 | the impact of BRAF mutation and microsatellite instability on prognosis in metastatic colorectal cancer                                                                                                                                                         |
| BRAF | 673 | 21693616 | Eight of 16 primary tumor samples and 4 of 6 metastatic samples showed BRAF V600E gene mutations and no copy number changes were associated exclusively with metastatic cancer                                                                                  |
| BRAF | 673 | 21750338 | BRAF mutation of papillary thyroid carcinoma may have differential predictive values for LN metastasis, according to tumor size.                                                                                                                                |
| BRAF | 673 | 21796448 | Importance of infiltrative growth pattern and invasiveness over presence of BRAF mutation in classic and follicular variant papillary thyroid carcinoma for development of nodal metastases.                                                                    |
| BRAF | 673 | 21943101 | BRAF mutation V600E significantly induces cell migration and invasion properties in vitro in colon cancer cells                                                                                                                                                 |
| BRAF | 673 | 21948220 | In malignant FNABs in papillary thyroid carcinoma, BRAF(V600E) mutation was significantly associated with presence of extra-thyroidal extension and metastases after surgery.                                                                                   |
| BRAF | 673 | 22249628 | None of the molecular marker mutations that were analyzed in this study, including the BRAF mutation, predicted lymph node metastasis in classic papillary thyroid carcinoma.                                                                                   |
| BRAF | 673 | 22435913 | analysis of a patient with pancreatic metastasis arising from a BRAF(V600E)-positive papillary thyroid cancer [case report]                                                                                                                                     |
| BRAF | 673 | 22681706 | BRAFFV600E mutation is associated with lymph node metastasis in multiple papillary thyroid carcinoma.                                                                                                                                                           |
| BRAF | 673 | 22740704 | These results clearly prove that the BRAFFV600E mutation is not associated with the development of distant metastases or fatal outcome in papillary thyroid carcinoma                                                                                           |
| BRAF | 673 | 22870241 | High-throughput genotyping in metastatic esophageal squamous cell carcinoma identifies phosphoinositide-3-kinase and BRAF mutations.                                                                                                                            |
| BRAF | 673 | 22941165 | The BRAF V600E mutation is the only independent predictor of compartment lymph node metastasis in papillary thyroid carcinoma.                                                                                                                                  |
| BRAF | 673 | 23055546 | BRAF mutation was associated with lymph node metastases (LNM), advanced stage, extrathyroidal extension, tumor size, male gender, multifocality, absence of capsule, classic PTC, and tall-cell variant papillary thyroid cancer.                               |
| BRAF | 673 | 23062653 | BRAF mutation was not found to be significantly associated with lymph node metastasis in patients with papillary thyroid cancer                                                                                                                                 |
| BRAF | 673 | 23098991 | Studied differential miRNA expression in metastatic colorectal cancer by microarrays from primary tumors of 33 patients who had wild-type KRAS/BRAF and third- to                                                                                               |

|      |     |          |                                                                                                                                                                                                                                                                 |
|------|-----|----------|-----------------------------------------------------------------------------------------------------------------------------------------------------------------------------------------------------------------------------------------------------------------|
|      |     |          | sixth-line anti-EGFRmAb treatment, with/without irinotecan.                                                                                                                                                                                                     |
| BRAF | 673 | 23132792 | BRAFV600E mutation is associated with cervical lymph node metastasis and recurrence in papillary thyroid cancer.                                                                                                                                                |
| BRAF | 673 | 23242808 | Data indicate that BRAF and EGF receptor or SRC family kinase inhibition blocked proliferation and invasion of the resistant tumors.                                                                                                                            |
| BRAF | 673 | 23401445 | The role of BRAF V600E as targetable driver mutation in lung adenocarcinoma is strengthened by finding that in vivo expression of V600E in mice leads to development of invasive adenocarcinoma, a phenotype that is reversed when V600E expression is stopped. |
| BRAF | 673 | 23435375 | BRAF(V600E) increases migration and invasion of thyroid cancer cells via upregulation of Snail with a concomitant decrease of its target E-cadherin.                                                                                                            |
| BRAF | 673 | 23533235 | genetic association studies in population in Italy: Data suggest that V600E mutation in BRAF in subjects with papillary thyroid carcinomas with/without lymph node metastases is not associated with disease progression.                                       |
| BRAF | 673 | 23569304 | Antitumor effects of vemurafenib are mediated by inhibiting oncogenic MAPK signaling in BRAF(V600)-mutant metastatic melanoma. Data suggest that inhibition downstream of BRAF should help to overcome acquired resistance.                                     |
| BRAF | 673 | 23613396 | K-RAS and B-RAF mutations do not seem to be predictive of treatment outcome as potential biomarkers for bevacizumab therapy in metastatic colorectal cancer.                                                                                                    |
| BRAF | 673 | 23615046 | BRAF mutation is associated with poor response to anti-EGFR MoAbs and it is an adverse prognostic biomarker of the survival of patients with metastatic colorectal cancer.                                                                                      |
| BRAF | 673 | 23636013 | Braf mutations were not associated with the risk of lymph node metastasis in papillary thyroid carcinoma.                                                                                                                                                       |
| BRAF | 673 | 23981603 | BRAF(V600E) mutation is predictive for distant metastasis in papillary thyroid carcinoma but not positively.                                                                                                                                                    |
| BRAF | 673 | 24030686 | There was no significant association between BRAF positivity and tumor multicentricity, lymphovascular invasion, extranodal extension, central neck involvement, advanced stage (stage III or IV), and distant metastasis.                                      |
| BRAF | 673 | 24123003 | HSP60 protein expression may inhibit lymph node metastasis in papillary thyroid carcinomas harboring the BRAF mutation.                                                                                                                                         |
| BRAF | 673 | 24335665 | Provided there is adequate quantity of viable tumor cells, immunohistochemical testing any melanoma sample from a patient with metastatic disease will accurately determine BRAF status.                                                                        |
| BRAF | 673 | 24367680 | BRAF V600E-mutation in metastatic colorectal cancer characterizes a subgroup of patients with distinct biologic, clinical and pathological features and is associated with very poor patients' prognosis.                                                       |
| BRAF | 673 | 24559116 | BRAF mutation was significantly associated with a larger tumor size, extrathyroidal invasion and lymph node metastasis in papillary thyroid cancer.                                                                                                             |
| CA2  | 760 | 22416960 | A significant correlation was found between positive carbonic anhydrase II staining and oral squamous cell carcinoma for more advanced clinical stage and larger tumor size, but not for positive lymph node metastasis, distal metastasis, and recurrence.     |
| CA9  | 768 | 15069539 | significantly higher rate of strong CA IX expression in non-invasive cancers influences survival data                                                                                                                                                           |
| CA9  | 768 | 17390110 | study confirms that the expression level of CA9 gene in conventional renal cell carcinoma is related to metastasis                                                                                                                                              |
| CA9  | 768 | 18695901 | Low expression of CAIX and high expression of VEGF is associated with metastasis in clear cell renal cell carcinoma.                                                                                                                                            |
| CA9  | 768 | 18976937 | COX-2 and carbonic anhydrase IX seem to be important predictors of outcome in patients with metastatic renal cell carcinomas                                                                                                                                    |
| CA9  | 768 | 19539328 | CA9 single nucleotide polymorphisms are common in patients with metastatic clear cell renal cell carcinoma                                                                                                                                                      |

|       |     |          |                                                                                                                                                                                                                                                                  |
|-------|-----|----------|------------------------------------------------------------------------------------------------------------------------------------------------------------------------------------------------------------------------------------------------------------------|
| CA9   | 768 | 19619339 | Carbonic anhydrase 9 may have a role in survival with a lower dose of bevacizumab in patients with previously treated metastatic colorectal cancer                                                                                                               |
| CA9   | 768 | 20358226 | CAIX is overexpressed in the majority of vulvar carcinomas with relationships to advanced tumor stages and development of lymph node metastases.                                                                                                                 |
| CA9   | 768 | 21223596 | Data show that CAIX is associated with advanced tumor stages and lymph node metastases in cervical cancer, potentially representing a new target in this disease.                                                                                                |
| CA9   | 768 | 21363891 | CA9 modulates tumor-associated cell migration and invasion.                                                                                                                                                                                                      |
| CA9   | 768 | 21745383 | Elevated serum levels of the invasion markers TIMP-1 and CAIX in metastatic breast cancer are prognostic markers and are associated with the presence of circulating tumor cells                                                                                 |
| CA9   | 768 | 21870331 | both MCT1 and CD147, but not MCT4, were associated with GLUT1 and CAIX expression in a large series of invasive breast carcinoma samples                                                                                                                         |
| CA9   | 768 | 22289741 | Pharmacologic interference of CAIX catalytic activity using monoclonal antibodies or CAIX-specific small molecule inhibitors, consequently disrupting pH regulation by cancer cells, has been shown recently to impair primary tumor growth and metastasis.      |
| CA9   | 768 | 23802595 | Carbon anhydrase IX specific immune responses in patients with metastatic renal cell carcinoma potentially cured by interleukin-2 based immunotherapy.                                                                                                           |
| CA9   | 768 | 24926090 | CAIX can be a useful ancillary marker for identifying mesothelial cells. There is no difference in CAIX expression between benign and malignant mesothelium. Caution should be exercised while evaluating for metastasis from renal cell carcinoma.              |
| CANX  | 821 | 22065046 | The data suggest that patients with low or defective TAP1 or calnexin in primary breast cancers may be at higher risks for developing brain metastasis due to the defects in T cell-based immunosurveillance.                                                    |
| RUNX2 | 860 | 15665096 | Fidelity of Runx2 intranuclear organization is necessary for expression of target genes that mediate the osteolytic activity of metastatic breast cancer cells.                                                                                                  |
| RUNX2 | 860 | 16166639 | Runx2-regulated MMP9 levels are functionally related to the invasion properties of cancer cells                                                                                                                                                                  |
| RUNX2 | 860 | 18829534 | A novel role of Runx2 in up-regulating the vicious cycle of metastatic bone disease, in addition to Runx2 regulation of genes related to progression of tumor metastasis.                                                                                        |
| RUNX2 | 860 | 19915614 | Runx2 is a key regulator of events associated with prostate cancer metastatic bone disease.                                                                                                                                                                      |
| RUNX2 | 860 | 21649908 | LGD1069 may impair angiogenic and metastatic potential induced by tumor cells through suppressing expression of Runx2 directly on human endothelial cells.                                                                                                       |
| RUNX2 | 860 | 21885439 | novel evidence that inhibition of BMP-2 or BMP-2-mediated MAPK/Runx2/Snail signaling is an attractive therapeutic target for osteolytic bone metastases in lung cancer patients.                                                                                 |
| RUNX2 | 860 | 22032690 | Runx2 and CBFbeta are required for the expression of genes that mediate the ability of metastatic breast cancer cells to directly modulate both osteoclast and osteoblast function.                                                                              |
| RUNX2 | 860 | 22396198 | RUNX2 is a potent prognostic factor in human colon carcinoma patients through the promotion of cell proliferation and invasion properties, and is at least partly upregulated by estrogen signals through ERbeta of carcinoma cells.                             |
| RUNX2 | 860 | 22641097 | Studied the potential molecular mechanism of thyroid cancer invasion. Data suggest enhanced Runx2 is functionally linked to tumor invasion and metastasis of thyroid carcinoma by regulating EMT-related molecules, MMPs and angiogenic/lymphangiogenic factors. |
| RUNX2 | 860 | 22821892 | We showed that Id1 controls the expression of the Runx2 isoform I and that this transcription factor plays a central role in mediating the Id1 proinvasive function in thyroid tumor cells.                                                                      |

|        |      |          |                                                                                                                                                                                                                                                            |
|--------|------|----------|------------------------------------------------------------------------------------------------------------------------------------------------------------------------------------------------------------------------------------------------------------|
| RUNX2  | 860  | 23389849 | Runx2 is a novel and important downstream mediator of the phosphatidylinositol 3-kinase (PI3K)/Akt pathway that is linked to metastatic properties of breast cancer cells.                                                                                 |
| RUNX2  | 860  | 23933319 | TSSC1 inhibits breast cancer cell invasion. Subsequently, TSSC1 is confirmed as a target of Runx2 and is negatively regulated by Runx2.                                                                                                                    |
| RUNX2  | 860  | 24069422 | CDH6 is under the control of the transcription factor RUNX2, which we previously described as a crucial mediator of the Id1 pro-invasive function in thyroid tumor cells.                                                                                  |
| CD1D   | 912  | 21695190 | Breast cancer cells, through downregulation of CD1d and subsequent evasion of natural killer T-mediated antitumor immunity, gain increased potential for metastatic tumor progression.                                                                     |
| CD34   | 947  | 16415795 | CD34 immunostaining provides some insights into the histogenesis of invasive and noninvasive implants in serous borderline tumors of the ovary.                                                                                                            |
| CD34   | 947  | 16557578 | bone marrow stem cells contribute to the growing tumor vasculature in Ewing's sarcoma and that vascular endothelial growth factor-165 is critical for the migration of CD34+ cells from the bone marrow into the tumor                                     |
| CD34   | 947  | 17656039 | Loss of CD34+ fibrocytes is not a consistent feature of invasive lobular carcinomas of the breast. A preserved CD34+ stromal cell population does not exclude malignancy.                                                                                  |
| CD34   | 947  | 18025805 | VEGF, HIF-1alpha and CD34 expressions were more common in gastric tumors without serosal invasion                                                                                                                                                          |
| CD34   | 947  | 23803010 | Data suggest that circulating CD34/VEGFR3 are biomarkers for epithelial ovarian cancer (EOC); circulating bone marrow-derived lymphatic/vascular endothelial progenitor cells are significantly increased in EOC and correlate with lymph node metastasis. |
| COL1A1 | 1277 | 15805113 | prostate carcinoma cell proliferation is enhanced by the down-regulation of BRCA2 expression when interacting with COL1, a major component of the ECM at osseous metastatic sites                                                                          |
| COL1A1 | 1277 | 16835341 | Increased C-telopeptide of collagen type I is associated with skeletal invasion of breast cancer                                                                                                                                                           |
| COL1A1 | 1277 | 17140440 | MT1-MMP is a major mediator of tumor cell invasiveness and type I collagen degradation by VHL RCC cells that express either MT1-MMP or HIF-2alpha                                                                                                          |
| COL1A1 | 1277 | 17889845 | Combined use of osteocalcin and beta-CTX could be useful in early detection of bone metastatic breast cancer which might improve the outcome of the disease.                                                                                               |
| COL1A1 | 1277 | 20181574 | Elevated C-terminal type I collagen telopeptide is associated with with bone metastases from castration-resistant prostate cancer.                                                                                                                         |
| COL1A1 | 1277 | 20359090 | The expression of Col I, Col IV and Fn was closely related to tumor invasion, the regional lymph node metastasis and other pathological features in laryngeal squamous cell carcinoma.                                                                     |
| COL1A1 | 1277 | 22694915 | basal lamina type IV collagen alpha chains, matrix metalloproteinases-2 and -9 expressions are expressed in oral dysplasia and invasive carcinoma                                                                                                          |
| COL1A1 | 1277 | 23013730 | High Fibrillar type I collagen matrices enhance metastasis/invasion of ovarian epithelial cancer via beta1 integrin and PTEN signals                                                                                                                       |
| COL1A1 | 1277 | 23276824 | High serum and urine levels of cross-linked N-telopeptide of type I collagen is associated with bone metastasis in lung cancer.                                                                                                                            |
| COL4A6 | 1288 | 15211113 | Collagen chains alpha5(IV) and alpha6(IV) were frequently absent in basement membrane from pancreatic adenocarcinoma, and their absence might be related to the invasion of cancer cells.                                                                  |
| COL4A6 | 1288 | 20359090 | The expression of Col I, Col IV and Fn was closely related to tumor invasion, the regional lymph node metastasis and other pathological features in laryngeal squamous cell carcinoma.                                                                     |



|         |      |          |                                                                                                                                                                                                                                                                                                           |
|---------|------|----------|-----------------------------------------------------------------------------------------------------------------------------------------------------------------------------------------------------------------------------------------------------------------------------------------------------------|
| COL17A1 | 1308 | 16487966 | Together, these data demonstrate a novel interaction between collagen XVII and alpha11b integrin and also suggest a possibility to use tirofiban to inhibit the invasion and progression of alpha11b expressing SCC tumors.                                                                               |
| CSPG4   | 1464 | 15210734 | MCSP may facilitate primary melanoma progression by enhancing the activation of key signaling pathways important for tumor invasion and growth.                                                                                                                                                           |
| CSPG4   | 1464 | 21658254 | Cell surface P-selectin binding depends on CHST11 gene expression. CSPG4 serves as a P-selectin ligand through its CS chain and participates in P-selectin binding to the highly metastatic breast cancer cells.                                                                                          |
| DMD     | 1756 | 24793134 | dystrophin is a tumor suppressor and likely anti-metastatic factor in myogenic tumors that progress to high-grade, lethal sarcomas                                                                                                                                                                        |
| DNM2    | 1785 | 20574164 | results suggest dynamin 2 might be involved in preventing tumor invasion and lymph node metastasis, possibly in relation with extracellular matrix degradation; may be a prognostic marker for these risk factors in early cervical squamous cell carcinoma                                               |
| DNM2    | 1785 | 21841817 | tumor cells overexpressing Dyn2 protruded lamellipodia at twice the rate, migrated faster (180%) and farther (2.5-fold greater distance) on glass and through transwell chambers                                                                                                                          |
| DNM2    | 1785 | 21996738 | this study identifies Dyn2 as an effector that mediates PDGFRalpha-SHP-2-induced glioma tumor growth and invasion                                                                                                                                                                                         |
| DNM2    | 1785 | 23537630 | study provides evidence the large GTPase Dyn2 regulates the small GTPase Rac1 to potentiate invasive migration of pancreatic tumor cells; Dyn2 plays an essential role in regulating Rac1-mediated pancreatic tumor cell migration through modulation of the Rac1 activator Vav1 via a direct interaction |
| DNM2    | 1785 | 24706848 | results demonstrate a regulatory relationship between DNM2, miR-199a, and HIF, with implications in cancer metastasis                                                                                                                                                                                     |
| ERBB2   | 2064 | 11839648 | NH(2)-terminal truncated HER-2 protein but not full-length receptor is associated with nodal metastasis in human breast cancer                                                                                                                                                                            |
| ERBB2   | 2064 | 12060497 | HER-2/neu peptides can activate T cells in draining lymph nodes from women with invasive breast cancer.                                                                                                                                                                                                   |
| ERBB2   | 2064 | 12065844 | S-erbB-2 serum levels above 40 U/ml independently predicted unfavorable response to 2d-line hormone or chemotherapy in advanced metastatic breast cancer. 1st-line drugs may select for overexpression of erbB-2 genes and lesser response to 2d-line drugs.                                              |
| ERBB2   | 2064 | 12209684 | significant HER2 expression seen in high-grade, muscle-invasive urothelial carcinoma; but HER2 expression in context of paclitaxel-based chemotherapy associated with significantly reduced risk of death                                                                                                 |
| ERBB2   | 2064 | 12607595 | Expression of vascular endothelial growth factor in invasive ductal carcinoma of the breast and the relation to angiogenesis and p53 and HER-2/neu protein expression.                                                                                                                                    |
| ERBB2   | 2064 | 12910292 | expression of nm 23 and c-erbB-2 in primary tumor and metastases of colorectal adenocarcinoma showed that the incidence and expression of both protein markers in primary tumor tissue tended to increase after the appearance of liver metastases                                                        |
| ERBB2   | 2064 | 14520464 | overexpression of HER2/neu is associated with the development of muscle-invasive transitional cell carcinoma of the bladder                                                                                                                                                                               |
| ERBB2   | 2064 | 14555515 | High levels of serum HER-2/neu reflect aggressiveness of metastatic breast cancer                                                                                                                                                                                                                         |
| ERBB2   | 2064 | 14566828 | value of this tumor marker regarding relapse, metastasis and death in resectable non-small cell lung cancer                                                                                                                                                                                               |
| ERBB2   | 2064 | 14631375 | HER-2 protein expression can be a useful tool in differentiating a primary cutaneous appendageal neoplasm from HER-2 expressing metastatic breast carcinoma.                                                                                                                                              |
| ERBB2   | 2064 | 14664140 | expression of c-erbB-2 protein may reflect biological behaviour of the tumour and may appear to be an important factor in development of colorectal cancer metastases                                                                                                                                     |

|       |      |          |                                                                                                                                                                                                                                                 |
|-------|------|----------|-------------------------------------------------------------------------------------------------------------------------------------------------------------------------------------------------------------------------------------------------|
| ERBB2 | 2064 | 14761474 | C-erbB-2 gene may be an important regulating gene in the coal miners with pneumoconiosis complicated by pulmonary cancer, and as a reference index to determine lymph node metastasis and prognosis.                                            |
| ERBB2 | 2064 | 15140287 | Data provide the distribution frequency of HER2 protein expression and gene amplification in invasive ductal and lobular breast cancer.                                                                                                         |
| ERBB2 | 2064 | 15211117 | In pancreatic ductal adenocarcinoma, membrane HER-2 overexpression was more frequent in intraductal than in invasive components but the incidence of cytoplasmic HER-2 overexpression did not differ between intraductal & invasive components. |
| ERBB2 | 2064 | 15254682 | EGFR, c-erbB-2, VEGF and MMP-2 and MMP-9 play an important role in tumor growth, invasion and metastasis in squamous cell carcinoma of the head and neck                                                                                        |
| ERBB2 | 2064 | 15335267 | In patients with breast cancer, most CNS metastatic tumor deposits showed expression for either EGFR or HER-2/neu, and less often for both.                                                                                                     |
| ERBB2 | 2064 | 15721309 | a splice variant of decay-accelerating factor is expressed in c-erbB-2-positive mammary carcinoma cells showing increased transendothelial invasiveness                                                                                         |
| ERBB2 | 2064 | 16169726 | HER-2/neu and p53 are likely to be involved in the regulation of COX-2 expression in invasive ductal carcinomas of the breast.                                                                                                                  |
| ERBB2 | 2064 | 16372244 | IHC and FISH together showed HER-2 overexpression/gene amplification in 21% of breast invasive carcinomas.                                                                                                                                      |
| ERBB2 | 2064 | 16596190 | Overexpression of HER-2 was associated with sentinel lymph node micro-metastasis in breast cancer patients                                                                                                                                      |
| ERBB2 | 2064 | 16681686 | HER2 appears to lack a critical role in the progression from ductal carcinoma in situ and invasive ductal carcinoma and HER2 status is maintained in metastatic lesions.                                                                        |
| ERBB2 | 2064 | 16685382 | The activation of HER-2/CXCR4/ Akt signaling pathway in primary breast tumors may contribute to the formation of bone metastases in breast cancer.                                                                                              |
| ERBB2 | 2064 | 16739379 | There was a significant relationship between the expression of HER-2/neu and clinical stages and lymph node metastasis in laryngeal squamous cell carcinoma.                                                                                    |
| ERBB2 | 2064 | 16782798 | Observed consistent increases in persistence associated with HER2 overexpression indicate a prospective mechanism for invasiveness previously documented in HER2-overexpressing human breast tumors.                                            |
| ERBB2 | 2064 | 16984552 | Significantly higher serum HER2 level was associated with bone metastasis of prostate cancer patients                                                                                                                                           |
| ERBB2 | 2064 | 17102066 | study shows that newly diagnosed HER-2-overexpressing breast cancer patients are at increased risk for brain metastases                                                                                                                         |
| ERBB2 | 2064 | 17243161 | Amplicon size is associated with response to trastuzumab in metastatic breast cancer.                                                                                                                                                           |
| ERBB2 | 2064 | 17322545 | Her-2/neu protein overexpression by HER-2 gene amplification may occur in extrahepatic cholangiocarcinoma and constitute an independent prognostic factor in patients with lymph node metastases.                                               |
| ERBB2 | 2064 | 17478762 | Expression of c-erbB-2 and p53 has no prognostic value in patients with early-stage breast cancer in which axillary lymph node metastasis is absent.                                                                                            |
| ERBB2 | 2064 | 17511881 | HER2 gene status remains highly conserved as breast cancers metastasise but discrepant results occur because of interpretational difficulties of HER2 amplification.                                                                            |
| ERBB2 | 2064 | 17541441 | Brain-metastasizing breast cancer belongs predominantly to the basal type or Her-2/neu type.                                                                                                                                                    |
| ERBB2 | 2064 | 17549338 | Overexpression of Her-2 is associated with Lymph node metastasis in bladder cancer                                                                                                                                                              |
| ERBB2 | 2064 | 17690040 | c-erbB-2 is highly correlated with differentiation grade and metastasis of the extrahepatic cholangiocarcinoma tumor                                                                                                                            |
| ERBB2 | 2064 | 17879632 | Significant heterogeneity exists between Her-2/neu expression in the in situ component and invasive components of adenocarcinoma of the breast.                                                                                                 |
| ERBB2 | 2064 | 17982484 | cellular PTPN13 inhibits Her2 activity by dephosphorylating the signal domain of Her2 and plays a role in attenuating invasiveness and metastasis of Her2                                                                                       |

|       |      |          |                                                                                                                                                                                                                      |
|-------|------|----------|----------------------------------------------------------------------------------------------------------------------------------------------------------------------------------------------------------------------|
|       |      |          | overactive tumors.                                                                                                                                                                                                   |
| ERBB2 | 2064 | 18035692 | A tight interaction between HER-2 and EPIL gene expression in invasive breast cancer cells is probable.                                                                                                              |
| ERBB2 | 2064 | 18038879 | Overexpression of Her-2 is associated with micrometastatic disease in men with prostate cancer                                                                                                                       |
| ERBB2 | 2064 | 18097576 | efficacy of molecular targeted therapy can be expected even for patients with metastatic lymph nodes as long as the primary tumors are positive for HER-2 expression.                                                |
| ERBB2 | 2064 | 18172732 | HER2 overexpression was found in only four cases (10.5%) of the studied primary tumors and in all cases the HER2 expression was retained in the paired metastases.                                                   |
| ERBB2 | 2064 | 18324648 | The androgen receptor signaling pathways may contribute to development of metastatic disease in prostate cancer.                                                                                                     |
| ERBB2 | 2064 | 18337451 | Lipid raft-disrupting agents inhibited raft-associated CXCL12/CXCR4 transactivation of the HER2 and cellular invasion in prostate cancer cells.                                                                      |
| ERBB2 | 2064 | 18372913 | PAR1-stimulated EGFR and ErbB2 transactivation leads to prolonged extracellular signal-regulated kinase-1 and -2 signaling and promotes breast carcinoma cell invasion.                                              |
| ERBB2 | 2064 | 18390199 | Hpa may up-regulate the expression of C-erbB-2 in invasive ductal breast carcinoma.                                                                                                                                  |
| ERBB2 | 2064 | 18415713 | There was no strong association between HER-2/neu overexpression and gene amplification in invasive urothelial carcinomas, and polysomy 17 was higher in tumors showing HER-2/neu overexpression.                    |
| ERBB2 | 2064 | 18501058 | Overexpression of HER2 is encountered in approximately 20% of invasive breast cancers.                                                                                                                               |
| ERBB2 | 2064 | 18571923 | This study shows superior survival in HER2+ group following whole brain radiotherapy for cerebral metastases of breast cancer as compared to HER2- group.                                                            |
| ERBB2 | 2064 | 18591932 | effects of HER2 amplification on carcinogenesis, tumorigenesis and invasion may be due to its effects on normal and malignant mammary stem/progenitor cells.                                                         |
| ERBB2 | 2064 | 18700025 | analysis of EGFR and HER2 expression in primary cervical cancers and corresponding lymph node metastases                                                                                                             |
| ERBB2 | 2064 | 18801081 | Grade 1 invasive ductal carcinoma have a higher incidence of lymph node metastasis and may have Her-2-neu overexpression compared to tubular carcinoma.                                                              |
| ERBB2 | 2064 | 18832579 | These data support the cooperative function of Pyk2 and FAK in breast cancer progression and suggest that dual inhibition of FAK and Pyk2 is an efficient therapeutic approach for targeting invasive breast cancer. |
| ERBB2 | 2064 | 18855148 | findings indicate that serum HER2/neu levels are clinically valuable in monitoring metastatic breast cancer and non-small cell lung cancer patients.                                                                 |
| ERBB2 | 2064 | 18948375 | we have demonstrated an increase in ERBB2 receptor activation in incompletely resected preinvasive breast cancer                                                                                                     |
| ERBB2 | 2064 | 19190626 | ErbB2 signalling regulated focal adhesion turnover in invasive breast cancer cells.                                                                                                                                  |
| ERBB2 | 2064 | 19192581 | Patients with a HER2 positive tumor receiving trastuzumab more frequently develop brain metastases than patients with a HER2 negative tumor but have a more favorable prognosis.                                     |
| ERBB2 | 2064 | 19208313 | ER and PR showed inverse association with HER-2/neu while positive association was seen with lymph node metastases in breast carcinoma patients in Pakistan                                                          |
| ERBB2 | 2064 | 19225924 | Patients with HER2-overexpressing breast cancer treated with trastuzumab had a high incidence of brain metastasis.                                                                                                   |
| ERBB2 | 2064 | 19255335 | we cannot recommend using serum HER2 extracellular domain levels to make trastuzumab or other treatment decisions for individual patients with advanced/metastatic breast cancer.                                    |

|       |      |          |                                                                                                                                                                                                                                   |
|-------|------|----------|-----------------------------------------------------------------------------------------------------------------------------------------------------------------------------------------------------------------------------------|
| ERBB2 | 2064 | 19269014 | The high level of HER-2 amplification in combination with the homogeneity of its expression in primary and metastatic tumors argues for a possible therapeutic utility of trastuzumab in HER-2-amplified gastric adenocarcinomas. |
| ERBB2 | 2064 | 19270645 | Invasive micropapillary carcinoma more commonly showed immunoreactivity for MUC1, CA125, and Her2Neu compared to invasive urothelial carcinoma with retraction artifact                                                           |
| ERBB2 | 2064 | 19443884 | although HER2/neu amplification, found in high grade and invasive tumors, is a rare event in transitional cell carcinoma of urinary bladder                                                                                       |
| ERBB2 | 2064 | 19447586 | retrospectively examined a series of breast cancer patients with brain metastases for the presence of HER-2                                                                                                                       |
| ERBB2 | 2064 | 19622585 | Non-small cell lung carcinoma brain metastases have some significant differences in HER family receptor-related abnormalities from primary lung tumors.                                                                           |
| ERBB2 | 2064 | 19729798 | no difference in metastatic breast cancer survival between HER2-nonamplified and HER2-amplified patients for subgroup as whole                                                                                                    |
| ERBB2 | 2064 | 19732720 | 14-3-3zeta cooperates with ErbB2 to promote ductal carcinoma in situ progression to invasive breast cancer by inducing epithelial-mesenchymal transition.                                                                         |
| ERBB2 | 2064 | 19889613 | 5.1% of invasive bladder carcinomas had a HER2 gene amplification.                                                                                                                                                                |
| ERBB2 | 2064 | 19923084 | The high expressions of VEGF-C and C-erbB-2 are closely related to lymph node metastasis in breast cancer patients.                                                                                                               |
| ERBB2 | 2064 | 19956951 | Our study shows that HER2-overexpressing breast cancer displays characteristic patterns of relapse and metastatic spread depending on estrogen receptor status                                                                    |
| ERBB2 | 2064 | 20023245 | Metastatic cancer-related hyperprolactinemia and lack of surgery-induced hyperprolactinemia are statistically more frequent in HER2-positive patients.                                                                            |
| ERBB2 | 2064 | 20027338 | A relationship between high levels of EGFR and HER-2 in the tumors of patients with esophageal squamous-cell carcinoma and intravascular tumor invasion and poor outcome of the disease was detected.                             |
| ERBB2 | 2064 | 20043103 | Interpretive guidelines for HER2 status assay in circulating cancer cells (CTCs) and raise great opportunities for using CTCs as non-invasive and 'real-time' biopsy to examine and monitor the status of tumor markers.          |
| ERBB2 | 2064 | 20087651 | Quantified/identified differences in protein levels between tumor and adjacent normal breast tissue from the same breast in 18 women with stage I/II ER positive/Her2/neu negative invasive breast cancer.                        |
| ERBB2 | 2064 | 20126619 | Data are consistent with a preferential localization of KLF6 in the nuclear compartment of early stage and small HER2-ERBB2 overexpressing ductal breast tumor cells, also presenting lymph node metastatic events                |
| ERBB2 | 2064 | 20159713 | The expression of HER-2/neu may play a role in the invasion, metastasis and progression of hepatocellular carcinoma.                                                                                                              |
| ERBB2 | 2064 | 20178580 | HER2 may have a role in response to trastuzumab in patients with metastatic breast cancer                                                                                                                                         |
| ERBB2 | 2064 | 20202990 | is expressed in breast cancer and metastatic lymph nodes                                                                                                                                                                          |
| ERBB2 | 2064 | 20419393 | HER2 gene amplification activates lamellipodia formation in breast cancer cells, which initiates their metalloproteinase-independent migration                                                                                    |
| ERBB2 | 2064 | 20585851 | Phase II study of nab-paclitaxel, bevacizumab, and gemcitabine as first-line therapy for patients with HER2-negative metastatic breast cancer.                                                                                    |
| ERBB2 | 2064 | 20670419 | The HER2 positivity rate of breast tumors (DIN1C-3, invasive carcinoma) may be as low as 9%. Immunohistochemistry as firstline testing for HER2 may result in false positive and false negative results.                          |
| ERBB2 | 2064 | 20731018 | Data indicate that high ErbB2 expression enhances cholangiocarcinoma invasion, motility and proliferation via the AKT/p70S6K pathway.                                                                                             |
| ERBB2 | 2064 | 20859679 | Compare HER2 status of circulating tumor cells in patients with metastatic breast cancer using two different methods.                                                                                                             |

|       |      |          |                                                                                                                                                                                                                                                                |
|-------|------|----------|----------------------------------------------------------------------------------------------------------------------------------------------------------------------------------------------------------------------------------------------------------------|
| ERBB2 | 2064 | 20929083 | HER2/neu is a marker of prognostic significance that is routinely assessed in invasive cancer.                                                                                                                                                                 |
| ERBB2 | 2064 | 20961652 | Analyses indicate that p130Cas expression in ErbB2 positive human breast cancers significantly correlates with higher risk to develop distant metastasis, thus underlying the value of the p130Cas/ErbB2 synergism in regulating breast cancer invasion.       |
| ERBB2 | 2064 | 20971737 | ErbB-2 signaling via the phosphatidylinositol 3-kinase pathway results in up-regulated matriptase zymogen activity, which contributes to prostate cancer cell invasion.                                                                                        |
| ERBB2 | 2064 | 21050467 | in ER negative basal and HER2+ breast cancer, gene expression modules reflecting T-cell helper-1 (Th1) and T-cell helper-2 (Th2) mediated immune responses play antagonistic roles as major risk factors for distant metastasis                                |
| ERBB2 | 2064 | 21172893 | Trastuzumab-DM1 has robust single-agent activity in patients with heavily pretreated, HER2-positive metastatic breast cancer and is well tolerated at the recommended phase II dose.                                                                           |
| ERBB2 | 2064 | 21198263 | HER-2 expression significantly correlates with Survivin at the protein level in primary invasive ductal breast cancer tissues                                                                                                                                  |
| ERBB2 | 2064 | 21259244 | Expression of ADAM 10 in gastric cancer is significantly associated with lymph node and distant metastasis, high C-erbB-2 expression, and poor prognosis.                                                                                                      |
| ERBB2 | 2064 | 21371829 | COX-2 overexpression correlates with HER2 overexpression in invasive breast carcinomas and may provide a clinically useful biomarker for estimating tumor aggressiveness.                                                                                      |
| ERBB2 | 2064 | 21383283 | Bevacizumab combination therapy improves clinical benefit in terms of increased progression-free survival in first-line treatment of Her-2 negative metastatic breast cancer.                                                                                  |
| ERBB2 | 2064 | 21437249 | A comprehensive immunohistochemical study was performed to investigate the protein expression of eight CT genes in 454 invasive ductal carcinomas, including 225 ER/PR/HER2-negative (triple-negative) carcinomas.                                             |
| ERBB2 | 2064 | 21445634 | in ileal neuroendocrine cancer, HER-2/neu overexpression plays a role in the carcinogenetic process and by triggering the altered expression of c-Met and MTA-1, may activate the molecular pathway(s) promoting tumor progression and metastasis development. |
| ERBB2 | 2064 | 21503112 | In invasive breast cancer ER is negatively associated with HER-2 amplification, whereas tumor emboli and lymph node status are positively associated with HER-2.                                                                                               |
| ERBB2 | 2064 | 21609713 | HER2 expression level is directly related to breast cancer invasion.                                                                                                                                                                                           |
| ERBB2 | 2064 | 21640482 | Her2 amplification in metastasising bladder cancer is relatively frequent, is homogeneous in each tumour component, and predicts early death.                                                                                                                  |
| ERBB2 | 2064 | 21667123 | Expression of ER, HER2, and TOP2A displayed discordance with a sufficient frequency to emphasize the role of confirmatory biopsies from metastatic lesions in future management of recurrent breast cancer.                                                    |
| ERBB2 | 2064 | 21708009 | There was no association between HER2/neu and VEGF expression among 317 colon cancer patients with all tumor stages. HER-2/neu expression was significantly correlated with tumor size & distant metastases.                                                   |
| ERBB2 | 2064 | 21733550 | Multifocal/multicentric invasive ductal carcinomas usually have a single phenotype in terms of hormone receptors, human epidermal growth factor receptor 2, and molecular subtypes.                                                                            |
| ERBB2 | 2064 | 21840040 | We confirmed evidence that discordance of ER/Her2 expression between primary and metastatic breast carcinoma does occur.                                                                                                                                       |
| ERBB2 | 2064 | 21913743 | results indicated that expression patterns of ER, NM23-H1, and HER2 in primary breast cancer lesions warn that cells might have metastatic potential                                                                                                           |

|       |      |          |                                                                                                                                                                                                                         |
|-------|------|----------|-------------------------------------------------------------------------------------------------------------------------------------------------------------------------------------------------------------------------|
| ERBB2 | 2064 | 21953571 | Report population pharmacokinetics of trastuzumab emtansine, a HER2-targeted antibody-drug conjugate, in patients with HER2-positive metastatic breast cancer.                                                          |
| ERBB2 | 2064 | 21961357 | Her2-Neu was expressed in 36.1% of 122 Mexican breast cancer patients. There was a close with relation the tumour size & the presence of lymph node metastases but not with age, differentiation or estrogen receptors. |
| ERBB2 | 2064 | 21966491 | Cinical study indicates that co-overexpression of Her2 with GEP100 in primary lung adenocarcinomas of patients is correlated with the presence of their node-metastasis with a statistical significance.                |
| ERBB2 | 2064 | 21986939 | A positive feedback loop between HER2 and ADAM12 in human head and neck cancer cells increases migration and invasion.                                                                                                  |
| ERBB2 | 2064 | 22081131 | SLP-2 and HER2/neu can play a role in lymph node/distant metastases of breast cancers                                                                                                                                   |
| ERBB2 | 2064 | 22092393 | the discordant HER2 amplification observed in metastatic gastric carcinoma lesions is explained substantially by heterogeneity within primary tumours.                                                                  |
| ERBB2 | 2064 | 22102915 | ErbB2 overexpression is associated with chemoradiation resistance in muscle-invasive bladder cancer.                                                                                                                    |
| ERBB2 | 2064 | 22104159 | This is the first report of a positive response to trastuzumab in a patient with HER2-overexpressing metastatic gastric cancer that was accompanied by bone marrow involvement and severe thrombocytopenia.             |
| ERBB2 | 2064 | 22119825 | Invasive ductal mammary carcinoma type was analyzed for comparative investigation of hormonal receptors (estrogen receptor ER and progesterone receptor PR) and Her2/neu oncoprotein expression.                        |
| ERBB2 | 2064 | 22253521 | Data suggest that iln gastric cancer, HER2 gene amplification is the main mechanism for HER2 protein overexpression and is preserved in lymph node metastases.                                                          |
| ERBB2 | 2064 | 22262199 | Report the interplay of HER2/HER3/PI3K and EGFR/HER2/PLC-gamma1 signalling in breast cancer cell migration and dissemination.                                                                                           |
| ERBB2 | 2064 | 22335909 | HER-2 is stably expressed in primary gastric cancer and metastatic lymph nodes. HER-2 and leptin play an important role in the progression and angiogenesis of gastric cancer                                           |
| ERBB2 | 2064 | 22340175 | AEG-1 might facilitate the proliferation and invasion of breast cancer cells by upregulating HER2/neu expression.                                                                                                       |
| ERBB2 | 2064 | 22378040 | ErbB-2 overexpression in human breast cancer cell lines leads to phosphorylation & activation of Plexin-B1. This was required for ErbB-2-dependent activation of RhoA & RhoC & promoted invasive behavior.              |
| ERBB2 | 2064 | 22410801 | HER2 expression was less frequent in resectable gastric cancer than in metastatic gastric cancer; the impact of HER2 expression on survival was limited                                                                 |
| ERBB2 | 2064 | 22460089 | Aberrantly expressed miR-125b contributes to HEC1B cells invasion partly through directly down-regulating ERBB2 protein expression in endometrioid endometrial cancer.                                                  |
| ERBB2 | 2064 | 22504780 | Letter/Case Report: HER2-positive metastatic apocrine carcinoma of the skin showing complete remission following administration of lapatinib/capecitabine.                                                              |
| ERBB2 | 2064 | 22534547 | Combinations of trastuzumab plus docetaxel-based regimens were well tolerated and effective in previously treated metastatic gastric cancer of Chinese patients with HER2 over-expression or gene amplification.        |
| ERBB2 | 2064 | 22646266 | human epidermal growth factor receptor 2 (HER2/neu) protein, a 185-kDa transmembrane tyrosine kinase receptor, is associated with tumor proliferation, migration, and differentiation                                   |
| ERBB2 | 2064 | 22737248 | analysis of multiorgan metastasis of human HER-2+ breast cancer in Rag2 <sup>-/-</sup> ;Il2rg <sup>-/-</sup> mice and treatment with PI3K inhibitor                                                                     |
| ERBB2 | 2064 | 22848366 | Correlation of HER2, p95HER2 and HER3 expression and treatment outcome of lapatinib plus capecitabine in her2-positive metastatic breast cancer.                                                                        |

|       |      |          |                                                                                                                                                                                                                                                    |
|-------|------|----------|----------------------------------------------------------------------------------------------------------------------------------------------------------------------------------------------------------------------------------------------------|
| ERBB2 | 2064 | 22883999 | Data suggest that HER-2 and leptin (but not leptin receptor) are up-regulated in gastric cancer and are associated with tumor invasiveness, lymphatic metastasis, and angiogenesis.                                                                |
| ERBB2 | 2064 | 22899400 | Propose that HER2 represents a reasonable target for molecular therapy in HER2- positive metastatic or recurrent mucinous ovarian carcinoma.                                                                                                       |
| ERBB2 | 2064 | 22911549 | c-erbB-2 overexpression may have a prognostic significance in patients with metastatic gastric cancer.                                                                                                                                             |
| ERBB2 | 2064 | 22952421 | clinical data analyses revealed a strong correlation between CD151 and ErbB2 expression and metastasis-free survival of breast cancer patients.                                                                                                    |
| ERBB2 | 2064 | 22973057 | Patients with HER2(+) metastatic breast cancers have epithelial-to-mesenchymal transition-circulating tumor cells.                                                                                                                                 |
| ERBB2 | 2064 | 23087329 | A subset of high-grade non-muscle-invasive bladder cancers contain Her2 amplification and are associated with markedly aggressive behaviour.                                                                                                       |
| ERBB2 | 2064 | 23220854 | EGFR and Her2 were significantly upregulated in lymph node metastasized colorectal cancer (LNM CRC) compared to non-LNM CRC.                                                                                                                       |
| ERBB2 | 2064 | 23225912 | HER2 examination on fluorescence in situ hybridization using fine-needle aspiration cytology samples of tumors in recurrent/metastatic sites or disseminated tumor cells in effusion is beneficial                                                 |
| ERBB2 | 2064 | 23279650 | The positive rate of vasculogenic mimicry in invasive breast carcinoma correlated with the increased HER2 expression.                                                                                                                              |
| ERBB2 | 2064 | 23307470 | WNT10B/beta-catenin signalling induces HMGA2 and proliferation in metastatic breast cancer tumours devoid of ERalpha, PR and HER2 expression.                                                                                                      |
| ERBB2 | 2064 | 23318431 | these data show that ionizing radiation-mediated activation of ErbB2 and induction of 14-3-3zeta collaborate to regulate FoxM1 and promote invasion of breast cancer cells                                                                         |
| ERBB2 | 2064 | 23348520 | HER2 gene copy number status is asociated with clinical efficacy in metastatic colorectal cancer                                                                                                                                                   |
| ERBB2 | 2064 | 23348899 | Heterogeneous HER2 expression in primary gastric tumors and the variable lymph node metastasis status suggest evaluating multiple samples.                                                                                                         |
| ERBB2 | 2064 | 23392720 | Our study suggested that ER/PR status and histological grade are risk factors for the development of bone metastasis in breast cancer patients.                                                                                                    |
| ERBB2 | 2064 | 23447672 | interaction between LPP and alpha-actinin, an actin cross-linking protein, is necessary for TGFbeta-induced migration and invasion of ErbB2-expressing breast cancer cells.                                                                        |
| ERBB2 | 2064 | 23468259 | The study aimed at examining the relationship between HER2 immunohistochemistry assessment scores in paired core needle biopsies and whole tissue sections of invasive ductal breast carcinoma.                                                    |
| ERBB2 | 2064 | 23483255 | Data indicate that monitoring tissue HER-2-positive breast cancer patients with serum HER-2 has a sufficient sensitivity to detect metastatic recurrence, while its use in monitoring of tissue HER-2-negative patients is unsatisfactory.         |
| ERBB2 | 2064 | 23523315 | Her-2/neu over-expression and parameters assessing metastatic burden in the SLN, particularly total metastatic area (TMA), predicted the presence of NSLN involvement and extranodal disease in patients with breast carcinoma and SLN metastases. |
| ERBB2 | 2064 | 23536719 | these results suggest that coupling HDAC and HER2 inhibitory activities to an EGFR inhibitor may potentially be effective in overcoming drug resistance and preventing cancer cell migration                                                       |
| ERBB2 | 2064 | 23542467 | HER2 mediates the effects of epidermal growth factor (EGF) on Snail, Slug and E-cadherin expression as well as on ovarian cancer cell invasion.                                                                                                    |
| ERBB2 | 2064 | 23548965 | BMs were detected very rarely in asymptomatic, non-metastatic HER2-positive breast cancer patients compared with asymptomatic, metastatic patients.                                                                                                |
| ERBB2 | 2064 | 23555577 | newly identified HER2 epitopes seem to be crucial for an effective immune response against HER2-overexpressing breast cancers and might help discriminating                                                                                        |

|       |      |          |                                                                                                                                                                                                                                                              |
|-------|------|----------|--------------------------------------------------------------------------------------------------------------------------------------------------------------------------------------------------------------------------------------------------------------|
|       |      |          | between metastatic breast cancer and early breast cancer                                                                                                                                                                                                     |
| ERBB2 | 2064 | 23575477 | Data indicate that genomic profiling of relapsed CDH1-mutated invasive lobular carcinoma (ILC) featured a high incidence of ERBB2 alterations.                                                                                                               |
| ERBB2 | 2064 | 23592719 | DOCK1-Rac signaling as an HER2 effector pathway essential for HER2-mediated breast cancer progression to metastasis.                                                                                                                                         |
| ERBB2 | 2064 | 23637122 | Analysis of plasma DNA with digital PCR has the potential to screen for the acquisition of HER2 amplification in metastatic breast cancer.                                                                                                                   |
| ERBB2 | 2064 | 23665199 | Two independent high-risk primary breast cancer subgroups for developing brain metastases were identified, represented by genetic alterations in either HER2 or EGFR/PTEN-driven pathways.                                                                   |
| ERBB2 | 2064 | 23691049 | Serum HER 2 extracellular domain level is correlated with tissue HER 2 status in metastatic gastric or gastro-oesophageal junction adenocarcinoma                                                                                                            |
| ERBB2 | 2064 | 23723333 | This study confirms that discordance in ER and PR receptor expression between the primary breast tumor and the corresponding metastatic lesions is high, whereas HER2 status remains relatively constant.                                                    |
| ERBB2 | 2064 | 23818346 | Immunohistochemical expression of HER-2 was not associated with characteristics of invasive breast cancers.                                                                                                                                                  |
| ERBB2 | 2064 | 23867476 | Expression of Delta-HER2 induces tumor formation and metastasis.                                                                                                                                                                                             |
| ERBB2 | 2064 | 23988598 | Pertuzumab, a novel HER2 dimerization inhibitor, has been shown to be effective in the treatment of metastatic HER2-positive breast cancer--{REVIEW}                                                                                                         |
| ERBB2 | 2064 | 24023299 | In contrast to the higher incidence reported at the population level, 20-30% HER2-positive cases for metastatic carcinomas, and only 11% of the screen-detected breast carcinomas displayed HER2/neu gene amplification                                      |
| ERBB2 | 2064 | 24036211 | MTK1 was identified in the HER2/HER3-HRG mediated extracellular acidification and cell migration pathway in breast cancer cells.                                                                                                                             |
| ERBB2 | 2064 | 24104881 | Breast cancer with a HER2 positive subtype is associated with the longest survival after diagnosis of distant metastases.                                                                                                                                    |
| ERBB2 | 2064 | 24158524 | siRNA cocktail, and co-downregulation of VEGF and HER2 result in significant inhibition of gastric cancer growth and migration in vitro                                                                                                                      |
| ERBB2 | 2064 | 24261710 | HER2 status in primary gastric cancer is a reliable basis for deciding whether to treat with anti-HER2 agents in patients with lymph node metastases.                                                                                                        |
| ERBB2 | 2064 | 24286315 | miR-221 may promote trastuzumab resistance and metastasis of HER2-positive breast cancers by targeting PTEN, suggesting its role as a potential biomarker for progression and poor prognosis                                                                 |
| ERBB2 | 2064 | 24311197 | High-level ERBB2 amplification is associated with shorter time-to-metastasis, but improved response to trastuzumab in metastatic breast cancer.                                                                                                              |
| ERBB2 | 2064 | 24322014 | calretinin immunoexpression and the hormonal status for estrogen receptors (ER), progesterone receptors (PR), and ERBB2, in 33 cases of cutaneous metastases of ductal breast carcinoma, as well as in seven primary cutaneous apocrine tumors, were studied |
| ERBB2 | 2064 | 24344005 | Capecitabine/cisplatin doublet has an encouraging antitumor activity with acceptable and manageable toxicity in anthracycline- and taxane-pretreated HER-2 negative metastatic breast carcinoma patients.                                                    |
| ERBB2 | 2064 | 24390418 | High HER2 expression is associated with brain metastases arising from breast cancer with stereotactic radiosurgery.                                                                                                                                          |
| ERBB2 | 2064 | 24643685 | HER2 was positive in nearly 52 % of the primary tumors, and these expressed HER2 in corresponding lymph node and liver metastases in 93 and 100 % of the cases, respectively                                                                                 |
| ERBB2 | 2064 | 24719937 | The expression of her-2 is closely related to differentiation degree, infiltration depth, lymph nodes' metastasis and pTNM stage of the esophageal cancer and to prognosis.                                                                                  |



|       |      |          |                                                                                                                                                                                                                                                |
|-------|------|----------|------------------------------------------------------------------------------------------------------------------------------------------------------------------------------------------------------------------------------------------------|
| ESRRA | 2101 | 20870744 | Data provide evidence for an autocrine regulatory loop involving transcriptional upregulation of WNT11 by ERRalpha and beta-cat that influences the migratory capacity of cancer cells.                                                        |
| ETS2  | 2114 | 20145133 | Ets2 is a central driver of a transcriptional program in tumor-associated macrophages that acts to promote lung metastasis of breast tumors.                                                                                                   |
| FN1   | 2335 | 17512904 | Twist regulates cell motility and invasion in gastric cancer cell lines, probably through the N-cadherin and fibronectin production                                                                                                            |
| FN1   | 2335 | 18006840 | expression of the alternatively spliced extra-domain A (EDA) of fibronectin in the neovasculature of metastases and primary tumors of human cancer patients was shown                                                                          |
| FN1   | 2335 | 20097172 | these data suggest that hypoxia promotes oral squamous cell carcinoma cell invasion that is elicited by HIF-1alpha-dependent alpha5 integrin and fibronectin induction.                                                                        |
| FN1   | 2335 | 20359090 | The expression of Col I, Col IV and Fn was closely related to tumor invasion, the regional lymph node metastasis and other pathological features in laryngeal squamous cell carcinoma.                                                         |
| FN1   | 2335 | 20530259 | MSF is a novel marker associated with the M2 stage of macrophage polarization expressed by tumor-conditioned macrophages; MSF may contribute to macrophage-mediated promotion of cancer cell invasion and metastasis.                          |
| FN1   | 2335 | 20939933 | rhFNHN29 and rhFNHC36 inhibit adhesion and invasion of liver cancer cells                                                                                                                                                                      |
| FN1   | 2335 | 21036738 | study suggests that FN and tissue transglutaminase (TG2) facilitate the metastatic activity of A431 tumor cells, and this may be partly attributed to TG2 enhancement of the association of FN and beta integrin                               |
| FN1   | 2335 | 21691075 | Metastasis suppressor KAI1/CD82 attenuates the matrix adhesion of human prostate cancer cells by suppressing fibronectin expression and beta1 integrin activation.                                                                             |
| FN1   | 2335 | 21924268 | miRNA-1 targets fibronectin1 and suppresses the migration and invasion of the HEp2 laryngeal squamous carcinoma cell line.                                                                                                                     |
| FN1   | 2335 | 23098431 | Serum oncofetal fibronectin mRNA in differentiated thyroid carcinoma cannot identify those with metastatic disease.                                                                                                                            |
| FN1   | 2335 | 23653350 | Data indicate that metastatic breast cancer (BC) cells that failed to activate STAT3 downstream of EGFR did display robust STAT3 activity upon adhesion to fibronectin (FN).                                                                   |
| FN1   | 2335 | 23684510 | Fibronectin expression in carcinoma cells correlates with tumor aggressiveness and poor clinical outcome in patients with invasive breast cancer.                                                                                              |
| FN1   | 2335 | 23791940 | MSF expression was upregulated in NSCLC tumors and promoted migration and invasion in A549 cells.                                                                                                                                              |
| FN1   | 2335 | 23895273 | The SOX2-FN1 axis is a key pathway in mediating the migration and invasion of ovarian cancer cells                                                                                                                                             |
| FN1   | 2335 | 24743511 | Endothelial cell-derived fibronectin extra domain A promotes colorectal cancer metastasis via inducing epithelial-mesenchymal transition                                                                                                       |
| GATA4 | 2626 | 23239811 | Results thus identify a novel epigenetic mechanism by which MYC activates GATA4 leading to metastasis in lung adenocarcinoma.                                                                                                                  |
| GLI2  | 2736 | 20660365 | In human melanoma cells, GLI2 expression was heterogeneous, associated with loss of E-cadherin and increased in the most aggressive tumors. In this preclinical study, GLI2 was directly involved in driving melanoma invasion and metastasis. |
| GLI2  | 2736 | 23356443 | high expression level of Gli2 was significantly associated with tumor differentiation, encapsulation, vascular invasion, early recurrence, and intra-hepatic metastasis in hepatocellular carcinoma.                                           |

|       |      |          |                                                                                                                                                                                                                                                                 |
|-------|------|----------|-----------------------------------------------------------------------------------------------------------------------------------------------------------------------------------------------------------------------------------------------------------------|
| GLI2  | 2736 | 23371028 | GLI2 was correlated with lymphovascular invasion and intestinal type gastric cancer.                                                                                                                                                                            |
| GNAS  | 2778 | 17186357 | GNAS1 T393C single nucleotide polymorphism is a novel genetic host factor for disease progression in patients with invasive breast carcinoma                                                                                                                    |
| HLA-C | 3107 | 20857097 | HLA-Cw group 1, which serves as ligand for certain KIR, was significantly overtransmitted in women with invasive cervical cancer, and particularly in the subgroup of women infected with high risk HPV16 or 18 subtypes.                                       |
| HMGA1 | 3159 | 15247513 | HMG-I(Y) expression may have a role in intrahepatic metastasis of hepatocellular carcinoma                                                                                                                                                                      |
| HMGA1 | 3159 | 17178855 | HMGA1 may be a novel molecular determinant of invasiveness and metastasis, as well as a potential therapeutic target, in pancreatic adenocarcinoma.                                                                                                             |
| HMGA1 | 3159 | 21138859 | miR-296 regulates HMGA1 expression and is associated with prostate cancer growth and invasion                                                                                                                                                                   |
| HMGA1 | 3159 | 21300033 | the expression of HMGA1 is related to malignant proliferation, invasion, and differentiation of glioblastoma and glioma from the prospective of tumor stem cells                                                                                                |
| HMGA1 | 3159 | 21573994 | knockdown of the HMGA1 gene could inhibit growth and metastasis potentials in tumor cells                                                                                                                                                                       |
| HMGA1 | 3159 | 21984063 | These results indicated that expression of HMGA1 correlates significantly with malignancy, proliferation, invasion, and angiogenesis of gliomas. We conclude that HMGA1 may be a potential biomarker and rational therapeutic target for human tumors.          |
| HMGA1 | 3159 | 22503056 | HMGA1 knockdown induced inhibition of colony formation and apoptosis in renal cell carcinoma cells. HMGA1 has a role in the metastatic including the acquisition of invasion potential and anoikis resistance.                                                  |
| HMGA1 | 3159 | 23201162 | miR-137, induced by its upstream transcription factor HMGA1, can suppress colorectal cancer cell invasion and metastasis by targeting FMNL2.                                                                                                                    |
| HMGA1 | 3159 | 23394223 | Expression in laryngeal squamous cell carcinoma is associated with clinical stage, histological grade, and lymph node metastasis                                                                                                                                |
| HMGA1 | 3159 | 23545254 | Interfering with HMGA1 expression reduces the tumorigenic and metastatic potential of breast cancer cells in vivo.                                                                                                                                              |
| HMGA1 | 3159 | 23835740 | High HMGA1 expression is associated with colorectal cancer metastasis.                                                                                                                                                                                          |
| HRG   | 3273 | 21215706 | Host-produced HRG inhibits tumor growth and metastasis by skewing tumor-associated macrophages (TAM) polarization away from the M2- to a tumor-inhibiting M1-like phenotype. Skewing of TAM polarization by HRG relies substantially on downregulation of PIGF. |
| IL15  | 3600 | 14581351 | IL-15 produced by metastatic colon carcinoma cells can induce hyperplasia in the mucosa adjacent to colon cancer, thus contributing to angiogenesis and progression of the disease                                                                              |
| ITIH3 | 3699 | 11807786 | Transfection into H460M Human large cell lung carcinoma line decreased tumor metastasis in nude mice                                                                                                                                                            |
| KCNH2 | 3757 | 14744775 | herg1 gene and HERG1 protein were expressed in a high percentage of primary human colorectal cancers, with the highest incidence occurring in metastatic cancers                                                                                                |
| KCNH2 | 3757 | 19495974 | hERG1 channel was proved to be a potential biomarker for gastric cancer invasion and survival.                                                                                                                                                                  |
| KIFC1 | 3833 | 19190132 | High KIFC1 expression is associated with metastatic spread to the brain in primary non-small cell lung cancer.                                                                                                                                                  |
| KRAS  | 3845 | 12644542 | results demonstrate that the mutational status of BRAF and KRAS is distinctly different among histologic types of ovarian serous carcinoma, occurring most frequently in invasive micropapillary serous carcinomas and its precursors, serous borderline tumors |
| KRAS  | 3845 | 15221969 | Sensitivity of PNA clamp PCR assay in identifying occult micrometastases in the sentinal lymph nodes of colorectal cancer patients by single-base mutation analysis.                                                                                            |

|      |      |          |                                                                                                                                                                                                                                                           |
|------|------|----------|-----------------------------------------------------------------------------------------------------------------------------------------------------------------------------------------------------------------------------------------------------------|
| KRAS | 3845 | 16257181 | The results suggest that oncogenic K-Ras enhances the malignant phenotype and identify the mitogen-activated protein kinase p38 as a target to inhibit oncogenic K-Ras-induced pancreatic tumor cell migration.                                           |
| KRAS | 3845 | 17465446 | Genetically, the non-polypoid growth type of submucosal invasive colorectal carcinoma shows much less frequent K-ras mutation.                                                                                                                            |
| KRAS | 3845 | 17534846 | it is suggested that atypical adenomatous hyperplasia (AAH) could develop by either KRAS or EGFR gene mutation, but AAH harbouring a KRAS gene mutation might not progress further to an invasive cancer                                                  |
| KRAS | 3845 | 17998284 | KRAS WT status is associated to survival benefit in cetuximab treated metastatic colorectal cancer.                                                                                                                                                       |
| KRAS | 3845 | 18202412 | results confirm the high prognostic value of KRAS mutations on response to cetuximab and survival in metastatic colorectal cancer patients treated with cetuximab                                                                                         |
| KRAS | 3845 | 19056857 | KRAS mutations in either primary or metastatic tumors from patients with colorectal cancer is concordant.                                                                                                                                                 |
| KRAS | 3845 | 19179548 | Report the importance of KRAS mutations and EGF61A>G polymorphism to the effect of cetuximab and irinotecan in metastatic colorectal cancer.                                                                                                              |
| KRAS | 3845 | 19282104 | study of KRAS/BRAF mutation status in a large and well-documented cohort of primary and metastatic renal cell carcinoma                                                                                                                                   |
| KRAS | 3845 | 19376842 | EGFR/KRAS mutation testing of multiple lung adenocarcinomas can assist in differentiating multiple primary lung adenocarcinomas from metastatic lesions.                                                                                                  |
| KRAS | 3845 | 19378369 | Several key studies have demonstrated that patients with mutant KRAS do not respond to treatment with epidermal growth factor inhibitors. This finding has several implications for clinicians who treat patients with metastatic colorectal cancer.      |
| KRAS | 3845 | 19549774 | Detection of KRAS mutational status in CTCs, by gene expression array, has potential for clinical application in selecting metastatic colorectal cancer patients most likely to benefit from cetuximab therapy.                                           |
| KRAS | 3845 | 19584155 | Results suggest that the mutations of EGFR, KRAS, BRAF between primary tumors and corresponding lymph node metastases should be considered whenever mutations are used for the selection of patients for EGFR-directed tyrosine kinase inhibitor therapy. |
| KRAS | 3845 | 19603018 | Assessing KRAS and BRAF mutations might help optimising the selection of the candidate metastatic colorectal cancer patients to receive anti-EGFR moAbs.                                                                                                  |
| KRAS | 3845 | 19603024 | KRAS mutation was associated with lack of response (P=0.002) and shorter progress free survival (P=0.09) in patients with metastatic colorectal cancer.                                                                                                   |
| KRAS | 3845 | 19740513 | EGFR and KRAS status of primary lung carcinomas may not predict the status in the corresponding metastases.                                                                                                                                               |
| KRAS | 3845 | 20010090 | The study suggests that activating KRAS mutants is a particularly important independent predictive marker in metastatic colorectal cancer patients treated with cetuximab                                                                                 |
| KRAS | 3845 | 20020061 | These results suggest a role for KRAS mutations in the propensity of primary colorectal tumors to metastasize to the lung.                                                                                                                                |
| KRAS | 3845 | 20049644 | KRAS mutations only in metastases is not associated with resistance to anti-EGFR treatment in primary colorectal tumors.                                                                                                                                  |
| KRAS | 3845 | 20049979 | 18/19 (94.7%) metastatic colorectal cancer smears were perfectly adequate for codon 12 and 13 KRAS mutational analysis by direct gene sequencing.                                                                                                         |
| KRAS | 3845 | 20100685 | KRAS mutation testing, preferably at diagnosis, must now be considered a new standard of care for patients with metastatic colorectal cancer being considered for EGFR-targeting                                                                          |
| KRAS | 3845 | 20591910 | Mutations in KRAS and BRAF genes are not directly implicated in the development of a MELF (macrocytic, elongated, and fragmented) pattern of invasion in endometrial carcinoma.                                                                           |
| KRAS | 3845 | 20619739 | if KRAS is not mutated, assessing BRAF, NRAS, and PIK3CA exon 20 mutations (in that order) gives additional information about the efficacy of cetuximab plus                                                                                              |

|      |      |          |                                                                                                                                                                                                                                                               |
|------|------|----------|---------------------------------------------------------------------------------------------------------------------------------------------------------------------------------------------------------------------------------------------------------------|
|      |      |          | chemotherapy in metastatic colorectal cancer.                                                                                                                                                                                                                 |
| KRAS | 3845 | 20645028 | samples of metastatic colorectal cancer were tested for the presence of the seven most common mutations in the KRAS gene and the V600E mutation in the BRAF gene                                                                                              |
| KRAS | 3845 | 20840818 | Expression level of EGFR protein and mutation frequency of KRAS gene in primary tumors were higher than that in metastases.                                                                                                                                   |
| KRAS | 3845 | 21129603 | This review focuses on current knowledge regarding the molecular landscape of metastatic colorectal cancer including and beyond KRAS, and will summarize novel rationally-developed combinatorial regimens that are being evaluated in early clinical trials. |
| KRAS | 3845 | 21155011 | Data show that KRAS mutation and PTEN protein expression are significantly correlated with the response rate and survival time of Chinese metastatic colorectal cancer patients treated with cetuximab.                                                       |
| KRAS | 3845 | 21169348 | Mutated KRAS status in tumors of Japanese patients with metastatic colorectal cancer is associated with lack of response to panitumumab therapy                                                                                                               |
| KRAS | 3845 | 21174225 | Combination chemotherapy with biweekly cetuximab and irinotecan was effective for pretreated metastatic colorectal cancer with wild-type KRAS.                                                                                                                |
| KRAS | 3845 | 21178719 | KRAS mutation analysis helps to differentiate between pulmonary metastasis from colon adenocarcinoma in situ and primary lung adenocarcinoma                                                                                                                  |
| KRAS | 3845 | 21228335 | KRAS mutation is associated with treatment response for metastatic colorectal cancer.                                                                                                                                                                         |
| KRAS | 3845 | 21239505 | KRAS mutation seems to be associated with metastasis in specific sites, lung and brain, in colorectal cancer patients                                                                                                                                         |
| KRAS | 3845 | 21364589 | Kras(G12D) allele promotes metastasis in pancreatic cancer cells partly through the downregulation of E-cadherin.                                                                                                                                             |
| KRAS | 3845 | 21414214 | these results suggest that a considerable proportion of NSCLC in Chinese population showed discrepancy in KRAS and EGFR mutation status between primary tumors and corresponding metastases.                                                                  |
| KRAS | 3845 | 21424126 | data indicated that colorectal cancers with KRAS and PIK3CA bi-mutations are more likely to develop into liver metastasis                                                                                                                                     |
| KRAS | 3845 | 21468700 | Expression of chemokine receptor CCR5 correlates with the presence of hepatic molecular metastases in K-ras positive colorectal cancer.                                                                                                                       |
| KRAS | 3845 | 21478103 | A review of several studies revealed a high rate of compliance of the KRAS gene mutational status in primary and metastatic tumors.                                                                                                                           |
| KRAS | 3845 | 21497370 | KRAS mutation in metastatic tumors is more commonly associated with advanced stages of cancer and correlates with a heavy smoking history.                                                                                                                    |
| KRAS | 3845 | 21508389 | Combined KRAS and TP53 mutation status is not predictive in CAPOX-treated metastatic colorectal cancer.                                                                                                                                                       |
| KRAS | 3845 | 21550229 | KRAS mutation status is a treatment effect modifier for anti-EGFR antibodies in metastatic colorectal cancer                                                                                                                                                  |
| KRAS | 3845 | 21555681 | Case Report: KRAS-mutation positive, metastatic tonsil carcinoma with cancer stem-like cell features and long-term response to gefitinib.                                                                                                                     |
| KRAS | 3845 | 21573767 | Heterogeneous distribution of K-ras codon 12 and 13 mutations within primary tumor, or between primary tumor and lymph node metastases, was demonstrated for 15 (20%) of 74 colon cancer patients having K-ras mutations.                                     |
| KRAS | 3845 | 21795973 | compared with KRAS codon 12 mutations, codon 13-mutated metastatic colorectal cancer presents as a more aggressive disease frequently associated with local and distant metastases at first diagnosis                                                         |
| KRAS | 3845 | 21825899 | Heterogeneous KRAS mutations within the primary colorectal tumor might play an important role for discordant KRAS status between primary and metastatic sites.                                                                                                |
| KRAS | 3845 | 21855038 | Mutant KRAS is associated with low drug response in metastatic colorectal cancer.                                                                                                                                                                             |
| KRAS | 3845 | 21894049 | KRAS mutation is associated with metastatic pancreatic ductal adenocarcinoma.                                                                                                                                                                                 |

|      |      |          |                                                                                                                                                                                                                              |
|------|------|----------|------------------------------------------------------------------------------------------------------------------------------------------------------------------------------------------------------------------------------|
| KRAS | 3845 | 21943101 | KRAS mutation G12V enhances the ability of colon adenocarcinoma cells to migrate and invade through filopodia formation and PI3K-dependent Cdc42 activation                                                                  |
| KRAS | 3845 | 21962894 | KRAS mutation is associated with metastatic colorectal cancer                                                                                                                                                                |
| KRAS | 3845 | 21982684 | KRAS gene may be instable during the metastatic process observed in non-small cell lung cancer, whereas the mutant KRAS genotype in the primary tumor could be more likely to change back to the wild-type after metastasis. |
| KRAS | 3845 | 22000810 | KRAS mutation is associated with metastatic colorectal cancer.                                                                                                                                                               |
| KRAS | 3845 | 22113502 | loss of heterozygosity at Kras can provide cancer cells functional growth advantages and promote metastasis.                                                                                                                 |
| KRAS | 3845 | 22177492 | A considerable proportion of NSCLC in Chinese patients showed discrepancy in KRAS and EGFR mutation status between primary tumors and corresponding metastases.                                                              |
| KRAS | 3845 | 22259183 | The KRAS status varied among different areas of the same metastatic focus in metastatic colorectal adenocarcinomas.                                                                                                          |
| KRAS | 3845 | 22446022 | KRAS may have a role in response of metastatic colorectal cancer to cetuximab                                                                                                                                                |
| KRAS | 3845 | 22638623 | KRAS mutation status is predictive of cetuximab response in the Japanese metastatic colorectal cancer patients.                                                                                                              |
| KRAS | 3845 | 22674181 | KRAS mutation is not associated with response to therapy in metachronous and synchronous metastatic colorectal adenocarcinoma                                                                                                |
| KRAS | 3845 | 22744738 | data showed that there was no significant difference in the mutation frequency of the KRAS gene between primary and distant metastatic colorectal tumors or lymph node metastatic tumors                                     |
| KRAS | 3845 | 22791568 | K-RAS mutations and amino acid substitutions are associated with metastatic colorectal cancer.                                                                                                                               |
| KRAS | 3845 | 22805857 | K-ras mutation is strongly associated with perineural invasion phenotypically. K-ras mutation is an independent prognostic factor of intrahepatic cholangiocarcinoma after hepatectomy.                                      |
| KRAS | 3845 | 22876814 | Organs initially involved by distant metastasis were different according to the KRAS mutational status in metastatic or recurrent colorectal cancer (MRCRC) patients.                                                        |
| KRAS | 3845 | 22948721 | Data suggests that KRAS codon 12 mutation may not represent a homogeneous entity in metastatic colorectal cancer when treated with cetuximab-based first-line therapy.                                                       |
| KRAS | 3845 | 22971512 | A high frequency of KRAS gene mutations exists in Chinese patients with colorectal cancer, and are associated with poor survival, tumor differentiation and liver metastasis.                                                |
| KRAS | 3845 | 22972628 | metastatic colorectal cancer patients with the KRAS p.G13D mutation appeared to benefit more from cetuximab than patients who had tumors with KRAS codon 12 mutations                                                        |
| KRAS | 3845 | 23027075 | This study provided further evidence for the prognostic importance of KRAS status in terms of recurrence-free and overall survival in patients with colorectal cancer liver metastases.                                      |
| KRAS | 3845 | 23075074 | A meta-analysis was performed to compare KRAS gene mutations in colorectal cancer tissue samples with primary and metastatic colorectal cancers                                                                              |
| KRAS | 3845 | 23090619 | Metastatic colorectal cancer patients with KRAS codon 13 mutations demonstrate a greater clinical response to anti-EGFR treatment than patients with other KRAS mutations [review]                                           |
| KRAS | 3845 | 23098991 | Studied differential miRNA expression in metastatic colorectal cancer by microarrays from primary tumors of 33 patients who had wild-type KRAS/BRAF and third- to                                                            |

|      |      |          |                                                                                                                                                                                                                                                                   |
|------|------|----------|-------------------------------------------------------------------------------------------------------------------------------------------------------------------------------------------------------------------------------------------------------------------|
|      |      |          | sixth-line anti-EGFRmAb treatment, with/without irinotecan.                                                                                                                                                                                                       |
| KRAS | 3845 | 23099803 | Ddata suggest that KRAS alterations are linked to clinical phenotypes in endometrial carcinomas with increase in copy-number and mRNA expression levels from primary to metastatic lesions.                                                                       |
| KRAS | 3845 | 23111797 | By identifying the KRAS mutational status at the metastasized colorectal carcinoma, a statement about the benefit of an anti-EGFR-therapy can be given, which is nowadays the basis of diagnostic and therapy of this cancer.                                     |
| KRAS | 3845 | 23134218 | High KRAS expression is associated with the proliferation and invasion of non-small cell lung cancer.                                                                                                                                                             |
| KRAS | 3845 | 23157828 | KRAS mutation has no significant correlation with colorectal carcinoma patients' age, tumor site, tumor gross appearance, degree of differentiation, depth of invasion, TNM stages, lymphatic invasion, abdominal or distant metastases and prognosis.            |
| KRAS | 3845 | 23161513 | Intercellular transfer of mutant KRAS is a characteristic feature of invasive colonic cancer cells.                                                                                                                                                               |
| KRAS | 3845 | 23280667 | Findings indicate that K-RAS regulates both caveolin-1 expression and other factors affecting caveolin-1 functions in colon cancer-derived cell migration.                                                                                                        |
| KRAS | 3845 | 23337026 | EGFR and KRAS mutational rates were comparable in primary and unpaired metastatic lung adenocarcinoma in pre-chemotherapy and postchemotherapy groups.                                                                                                            |
| KRAS | 3845 | 23473612 | This study confirmed that KRAS testing is definitely part of the management of most of metastatic colorectal cancer patients, despite discrepancies observed in the rate of prescription and the time of results.                                                 |
| KRAS | 3845 | 23495083 | KRAS mutations are associated with metastatic lung adenocarcinoma.                                                                                                                                                                                                |
| KRAS | 3845 | 23510802 | Data show that KRAS codon 12/13 mutations have negative prognostic value in metastatic colorectal cancer patients treated with FOLFOX/XELOX, but is not predictive of treatment benefit with cediranib, using progression-free survival and overall survival.     |
| KRAS | 3845 | 23558076 | DAB2IP expression was reduced in patients with pancreatic cancer compared with those with no cancer. DAB2IP expression was correlated with the KRAS gene, perineurial invasion and clinical stage of the disease.                                                 |
| KRAS | 3845 | 23613396 | K-RAS and B-RAF mutations do not seem to be predictive of treatment outcome as potential biomarkers for bevacizumab therapy in metastatic colorectal cancer.                                                                                                      |
| KRAS | 3845 | 23625655 | findings demonstrate that the presence of a K-ras mutation correlated with high initial CEA and CA 19-9 levels in patients with metastatic colorectal cancer                                                                                                      |
| KRAS | 3845 | 23790176 | Taiwanese patients with metastatic colorectal cancer respond better to a cetuximab plus chemotherapy regime if their tumors have the wild-type KRAS gene                                                                                                          |
| KRAS | 3845 | 23975858 | There was a negative correlation between KRAS codon 12 mutations and the level of HLA class I antigens in primary and metastatic tumors.                                                                                                                          |
| KRAS | 3845 | 23999427 | Stem cells with Kras(G12D) activation and Smad4 depletion can produce tumors that are multipotent and susceptible to epithelial mesenchymal transformation and metastasis.                                                                                        |
| KRAS | 3845 | 24024839 | RAS mutations, in addition to KRAS exon 2 mutations, predict a lack of response to anti-EGFR therapy in patients with metastatic colorectal cancer.                                                                                                               |
| KRAS | 3845 | 24244261 | The combination of lenalidomide and cetuximab appeared to be well tolerated but did not have clinically meaningful activity in KRAS-mutant metastatic colorectal cancer patients.                                                                                 |
| KRAS | 3845 | 24407191 | As second- or later-line treatment of patients with KRAS-mutated metastatic colorectal cancer.                                                                                                                                                                    |
| KRAS | 3845 | 24491301 | K-Ras mutation activates CSCs, contributing to colorectal tumorigenesis and metastasis in CRC cells harboring APC mutations. Initial activation of beta-catenin by APC loss and further enhancement through K-Ras mutation induces CD44, CD133, CD166 expression. |

|        |      |          |                                                                                                                                                                                                                                                      |
|--------|------|----------|------------------------------------------------------------------------------------------------------------------------------------------------------------------------------------------------------------------------------------------------------|
| LAMA4  | 3910 | 16146715 | laminin isoform changes are associated with brain tumor invasion and angiogenesis [review]                                                                                                                                                           |
| LAMA4  | 3910 | 17533363 | alpha4 chain Lms have a de-adhesive function and could thus play a role in detachment, migration and invasion of renal carcinoma cells in vivo.                                                                                                      |
| LAMA4  | 3910 | 18496706 | Concomitant changes take place in laminin- and collagen-binding receptors. Laminin-411 reduces adhesion to laminin-511 and fibronectin, suggesting that tumor cells could utilize laminin-411 in their invasive behavior                             |
| LAMA4  | 3910 | 19048114 | LM alpha4 and beta2 have roles in in vitro migration and in vivo tumorigenicity of prostate cancer cells                                                                                                                                             |
| MAF    | 4094 | 18058096 | After 32-50 weekly administrations of 100 ng GcMAF, all colorectal cancer patients exhibited healthy control levels of the serum Nagalase activity, indicating eradication of metastatic tumor cells.                                                |
| MAP3K4 | 4216 | 24036211 | MTK1 was identified in the HER2/HER3-HRG mediated extracellular acidification and cell migration pathway in breast cancer cells.                                                                                                                     |
| MICB   | 4277 | 24173243 | Poorly differentiated tumors showed high MICA/B expression, which was related to extended tumor lymph node metastases and less frequent long-term survival.                                                                                          |
| MKI67  | 4288 | 11744991 | Not significantly correlated with lymph node metastasis of breast invasive ductal carcinoma.                                                                                                                                                         |
| MKI67  | 4288 | 14674120 | compared the expression of Ki-67 between primary breast tumors and metastasis to regional lymph nodes; estimated the relationships between Ki-67 and the anatomoclinical features of the breast cancer                                               |
| MKI67  | 4288 | 17065089 | analysis of Ki67 and thymidylate synthase expression in primary tumour compared with metastatic nodes in breast cancer patients                                                                                                                      |
| MKI67  | 4288 | 17647192 | findings suggest Ki67 expression as a prognostic marker for lymph node metastasis in penile squamous carcinoma                                                                                                                                       |
| MKI67  | 4288 | 18561741 | Expression of Ki-67 in cervical intraepithelial neoplasia and invasive squamous cell carcinoma of the uterine cervix                                                                                                                                 |
| MKI67  | 4288 | 18798062 | Ki-67 plays a role in breast carcinoma cell proliferation & invasion. Expression of Ki-67 is essential for cell growth & tumorigenicity.                                                                                                             |
| MKI67  | 4288 | 19080002 | Overexpression of Bmi-1 and Ki67 protein are significantly correlated with tumorigenesis, metastasis and prognosis of colorectal carcinoma.                                                                                                          |
| MKI67  | 4288 | 19690767 | The main objectives were to assess tumor proliferation and invasiveness biomarkers (Ki-67, E-cadherin) and to identify potential correlation between biomarkers and classic prognostic factors in cervical cancer.                                   |
| MKI67  | 4288 | 19788614 | Endothelial proliferation assessed on Ki-67 combined with the lack of CD105 expression is often associated with invasive cervical carcinoma.                                                                                                         |
| MKI67  | 4288 | 20338617 | Increased expression of Ki-67 was associated with the presence of lymph node metastasis, advanced stages of disease, tumors occurring in the floor of mouth, and moderately/well-differentiated oral squamous cell carcinoma.                        |
| MKI67  | 4288 | 20483025 | A review of literature is carried out to correlate the role of Ki-67 labeling index and its correlation with clinical findings, tumor size, invasiveness, recurrence, adenoma subtype, adenoma doubling time, and pituitary carcinomas is addressed. |
| MKI67  | 4288 | 20848772 | The positive intensity of Ki67 protein expression in primary ovarian cancers was significantly higher than in metastatic ovarian cancers.                                                                                                            |
| MKI67  | 4288 | 21655651 | The aim of this work is to study the distribution of CD105 positive vessels and the proliferation rate of endothelial cells from liver metastasis of colon carcinoma based on double immunostaining CD105/Ki67.                                      |
| MKI67  | 4288 | 21655654 | The prognostic value of the correlations between the expression of estrogen and progesterone receptors, Ki67 expression and the histological stage, tumor stage, the degree of myometrial and vascular invasion, was investigated.                   |
| MKI67  | 4288 | 21809665 | In grade 3 samples of CIN (Cervixal Intreapithelial Neoplasia), expression of Ki-67, separately or combined with thymidine phosphorylase, seemed to be related to                                                                                    |

|       |      |          |                                                                                                                                                                                                                                               |
|-------|------|----------|-----------------------------------------------------------------------------------------------------------------------------------------------------------------------------------------------------------------------------------------------|
|       |      |          | progression to invasive cancer. Ki-67 levels were shown to correlate directly with CIN grade.                                                                                                                                                 |
| MKI67 | 4288 | 22452996 | HIF-2a was correlated with ABCG2 expression, histology-grade and Ki67 expression in breast invasive ductal carcinoma                                                                                                                          |
| MKI67 | 4288 | 22542077 | The expression of MIB-1 was statistically elevated in higher-grade osteosarcoma patients 25 years or younger and in tumors located in extremities and metastatic lesions.                                                                     |
| MKI67 | 4288 | 22890751 | High Ki67 expression in the primary tumor is an independent adverse prognostic factor in metastatic breast cancer.                                                                                                                            |
| MKI67 | 4288 | 22995634 | Tumor sizes and high Ki67 PI in the invasive front appear to be important prognostic tools for head and neck squamous cell carcinoma.                                                                                                         |
| MKI67 | 4288 | 23235554 | Ki67 overexpression is associated with central nervous system metastases in operable breast cancer.                                                                                                                                           |
| MKI67 | 4288 | 23818346 | Immunohistochemical expression of Ki67 was not associated with characteristics of invasive breast cancers.                                                                                                                                    |
| MKI67 | 4288 | 24360660 | Data indicate that Ki-67 positivity is prognostic for predicting non-muscle invasive bladder cancer (NMIBC) recurrence and progression.                                                                                                       |
| MKI67 | 4288 | 25211928 | an association between the vimentin and ki-67 expression levels and the degree of spread of metastatic renal cell carcinoma was identified: the high level of expression of these markers precludes the increase of life expectancy           |
| MMP2  | 4313 | 11168762 | involvement of MMPs in microinvasive carcinomas                                                                                                                                                                                               |
| MMP2  | 4313 | 11854622 | in pancreatic cancer, invasion into large veins and destroyed type veins could be a risk factor for liver metastasis and that increased expression MMP-2 and MMP-9 were related to such invasion.                                             |
| MMP2  | 4313 | 11956628 | expression level of MMP-2 mRNA may regulate with invasion ability of cervical cancer                                                                                                                                                          |
| MMP2  | 4313 | 12393872 | Autocrine/paracrine prostaglandin E2 production by non-small cell lung cancer cells regulates enzyme and cd44 in cox-2-dependent invasion                                                                                                     |
| MMP2  | 4313 | 12451991 | The in vitro invasive ability of ovarian tumor cells appeared to be positive correlated to high expression of VEGF and MMP-2.                                                                                                                 |
| MMP2  | 4313 | 12479097 | The over-expression of MMP-2, MMP-9, TIMP-1, and TIMP-2 may play a key role in invasion and lymph-node metastasis of in squamous carcinoma of the cervix.                                                                                     |
| MMP2  | 4313 | 12602913 | MMP-2 is associated with tumor size, invasiveness and survival in breast cancer.                                                                                                                                                              |
| MMP2  | 4313 | 12632066 | MMP2 is regulated by IL-8 in invasive pancreatic cancer                                                                                                                                                                                       |
| MMP2  | 4313 | 12684625 | Increased expression of MMP-2 in advanced stage and high grade renal cell carcinoma might be associated with tumor invasion and metastasis                                                                                                    |
| MMP2  | 4313 | 12845641 | Increased in situ mmp-2 activity in renal cell tumor tissues correlates with tumor size, grade and vessel invasion                                                                                                                            |
| MMP2  | 4313 | 12861074 | plays a critical role in inducing tumor cell infiltration, and this invasive phenotype is caused by activation of MMP-2                                                                                                                       |
| MMP2  | 4313 | 14519487 | results suggest that matrix metalloproteinase 2 plays an important role in tumor invasion and metastasis                                                                                                                                      |
| MMP2  | 4313 | 14614057 | MMP-2 immunostaining was positive in 4 of 8 cases of invasive carcinoma and stained stromal area around tumor nest. Matrix metalloproteinases are activated in carcinoma in situ and in cervical intraepithelial neoplasia of uterine cervix. |
| MMP2  | 4313 | 14644155 | findings established the existence of a novel alternative/complementary pathway by which furin increases tumor cell invasion through an amplification/activation loop between MMP-2 and TGFbeta                                               |
| MMP2  | 4313 | 14713104 | one of the mechanisms by which S100A4 may exert its effect on metastasis of some tumors is by regulating the MMP-2 activity.                                                                                                                  |
| MMP2  | 4313 | 14766248 | Stromal MMP-2 occurs early and may play a role early in ovarian adenocarcinoma invasion.                                                                                                                                                      |



|      |      |          |                                                                                                                                                                                                                |
|------|------|----------|----------------------------------------------------------------------------------------------------------------------------------------------------------------------------------------------------------------|
| MMP2 | 4313 | 14981939 | Various growth factors induce migration of human non-small cell lung cancer cells in the presence of extracellular matrix (ECM) components MMP-2 and MMP-9.                                                    |
| MMP2 | 4313 | 14990972 | Matrix metalloproteinase-2 may play a role in the pathogenesis, invasion, and metastasis of cutaneous squamous cell carcinoma.                                                                                 |
| MMP2 | 4313 | 15067014 | MMP-2 or MMP-9 mediated tumor cell invasion requires integrin cytoplasmic-tail motif EKQKVDLSTDC                                                                                                               |
| MMP2 | 4313 | 15254682 | EGFR, c-erbB-2, VEGF and MMP-2 and MMP-9 play an important role in tumor growth, invasion and metastasis in squamous cell carcinoma of the head and neck                                                       |
| MMP2 | 4313 | 15485653 | MMP-2 -1306 C-->T polymorphism may be associated with colorectal cancer development and invasion                                                                                                               |
| MMP2 | 4313 | 15567754 | MMP-2 plays an essential role in tumor invasion and metastasis, while TIMP-2 is shown to strongly inhibit cancer invasion and metastasis.                                                                      |
| MMP2 | 4313 | 15609323 | alphav integrins and MMP2 have roles in migration of human ovarian adenocarcinoma cells through endothelial extracellular matrix                                                                               |
| MMP2 | 4313 | 15756447 | E1AF positively regulates transcription from MT1-MMP genes, which plays an important role in invasion and metastasis of squamous cell carcinoma of the tongue by converting pro-MMP-2 into active-MMP-2        |
| MMP2 | 4313 | 15820246 | Hypoxia induces an increased invasive capacity via gelatinase up-regulation without loss of cell viability in adenocarcinomas                                                                                  |
| MMP2 | 4313 | 15929171 | MMP-2 may play an important role in the development of invasion and metastasis of gastric cancer.                                                                                                              |
| MMP2 | 4313 | 16134528 | There was a significant correlation between active MMP-2 and the invasion and metastasis of epithelial ovarian cancer. Active MMP-2 is a prognostic indicator in patients with epithelial ovarian cancer.      |
| MMP2 | 4313 | 16142392 | MMP-2 may play an important role in the invasion and metastasis of oral squamous cell carcinoma.                                                                                                               |
| MMP2 | 4313 | 16158251 | The expression of MMP2 is consistently significantly higher in neoplastic brain tissue compared to normal brain tissue, and may be involved in the process of metastasis of breast cancer to the brain.        |
| MMP2 | 4313 | 16407830 | Both MAPKAPK2 and HSP27 are necessary for TGFbeta-mediated increases in MMP-2 and cell invasion in human prostate cancer.                                                                                      |
| MMP2 | 4313 | 16718824 | MMP-2 expression has significant correlation with tumor invasion, tumor differentiation and lymph node metastases; MMP-2 may participate in the development of lymph node micrometastasis of gastric carcinoma |
| MMP2 | 4313 | 17029196 | Data show that MMP2 may be relevant with carcinogenesis, development and metastasis of adenoid cystic carcinoma, and different metastasis potential may result from different subtype of MMPs gene family.     |
| MMP2 | 4313 | 17203213 | beta3 integrin in MDA-MB-231 breast cancer cells may lead to increased MMP-2 expression and activity and might contribute to the enhanced invasive potential observed                                          |
| MMP2 | 4313 | 17545513 | stromal fibroblasts play a role in promoting pancreatic cancer metastasis via activation of the uPA-plasminogen-MMP-2 cascade                                                                                  |
| MMP2 | 4313 | 17546628 | Our results suggest that the presence of -1575G allele in the MMP-2 promoter region may be of significance in the assessment of colorectal cancer risk and invasive potential.                                 |
| MMP2 | 4313 | 17570740 | results suggest that MMP2 is a more sensitive predictor than MMP9 of lung cancer progression, metastasis, and survival                                                                                         |
| MMP2 | 4313 | 17706116 | P-gp substrate drugs can greatly upregulate the expression of CD147 and MMP2 and 9 in multidrug resistant breast cancer cells, therefore enhancing the tumor metastatic capability.                            |
| MMP2 | 4313 | 17876296 | ROCK-II is a critical mediator of colon cancer cell invasion through its modulation of MMP-2 and -13 at the site of invadopodia but regulates proliferation in                                                 |

|      |      |          |                                                                                                                                                                                                                                                              |
|------|------|----------|--------------------------------------------------------------------------------------------------------------------------------------------------------------------------------------------------------------------------------------------------------------|
|      |      |          | non-malignant intestinal cells.                                                                                                                                                                                                                              |
| MMP2 | 4313 | 18000234 | MMP-2 upregulation confers on tumor cells the ability to degrade the subepithelial basement membrane and subsequently invade the cervix.                                                                                                                     |
| MMP2 | 4313 | 18042068 | MMP-2, MMP-9, TIMP-1 and TIMP-2 play an important role in the pathogenesis of non-melanoma skin cancer. The immunoeexpression of these proteins may be useful indicators of cutaneous cancer invasion and progression.                                       |
| MMP2 | 4313 | 18172354 | The expression level of Matrix Metalloproteinase 2 mRNA showed an increasing trend according to differentiation, lymphatic invasion and Dukes' stage in colon cancer tissues.                                                                                |
| MMP2 | 4313 | 18214299 | Data show that enhanced expression of matrix metalloproteinases 2 was detected in colorectal cancer patients with distant metastases.                                                                                                                        |
| MMP2 | 4313 | 18265895 | Crucial participants in tumour invasion and metastases are matrix metalloproteinases, tissue inhibitor of metalloproteinase inhibitors and cellular adhesion molecules. They play roles in tumour invasion and metastasis in non-small-cell lung carcinomas. |
| MMP2 | 4313 | 18288638 | Data suggest that Fra-1 enhances lung cancer epithelial cell motility and invasion by inducing the activity of matrix metalloproteinases, in particular MMP-2 and MMP-9, and EGFR-activated signaling.                                                       |
| MMP2 | 4313 | 18330957 | Metastatic gastric cancer presents more aggressive histological morphology and higher MMP-2 immunoreactivity than primary gastric cancer.                                                                                                                    |
| MMP2 | 4313 | 18337444 | Knockdown of MMP-2 did not significantly alter the metastatic potential of the liver cancer cells but lead to a marked inhibition of metastatic foci growth.                                                                                                 |
| MMP2 | 4313 | 18340378 | MMP-2 expressed by metastatic ovarian cancer cells functionally regulates their attachment to peritoneal surfaces                                                                                                                                            |
| MMP2 | 4313 | 18431027 | soluble EMMPRIN probably triggers the promotion of cancer invasion in vivo                                                                                                                                                                                   |
| MMP2 | 4313 | 18483282 | Rap1GAP inhibits tumor growth but induces MMP2- and MMP9-mediated SCC invasion and tumor progression, suggesting a role for this protein as a biomarker for early N-stage, aggressive SCCs                                                                   |
| MMP2 | 4313 | 18644390 | Data suggest that KiSS-1 suppresses the motility and invasive ability of renal cell carcinoma cells which possess hOT7T175 with either a negative expression or very low expression level of KiSS-1 through, at least in part, the down-regulation of MMP-2. |
| MMP2 | 4313 | 18652765 | Results describe the relationship between protein expression of VEGF-C, MMP-2 and lymph node metastasis in papillary thyroid cancer.                                                                                                                         |
| MMP2 | 4313 | 18665467 | Pathologic findings demonstrated that the intensity of MMP2 staining in cancerous tissues was associated significantly with histological types, distant metastasis, and Nevin stages of gallbladder carcinomas.                                              |
| MMP2 | 4313 | 18707587 | Data suggest that alpha5beta1 intergrin controls invasion ability of MCF-7/ADR breast carcinoma cells by regulating expression of MMP-2.                                                                                                                     |
| MMP2 | 4313 | 18714566 | This study corroborates that stromal cells play an important role in tumor invasion and progression, mediated by the progressive enhancement of MMP-2 expression from CIN3 to advanced invasive tumor.                                                       |
| MMP2 | 4313 | 18757369 | a link between RhoA, JNK, c-Jun, and MMP2 activity that is functionally involved in the reduction in osteosarcoma cell invasion by the statin. This suggests a novel strategy targeting RhoA-JNK-c-Jun signaling to reduce osteosarcoma cell tumorigenesis.  |
| MMP2 | 4313 | 18946196 | Ganoderic acid Me inhibits tumor invasion through down-regulating matrix metalloproteinases 2/9 gene expression.                                                                                                                                             |
| MMP2 | 4313 | 18950008 | COX-2 and MMP-2 expression was increased in nasopharyngeal carcinoma, and was positively correlated with lymph node metastasis.                                                                                                                              |
| MMP2 | 4313 | 18974156 | results suggest that MMP-2 activation by MT1-MMP potentially amplifies protease activity, and combination with direct cleavage of substrate causes tissue                                                                                                    |

|      |      |          |                                                                                                                                                                                                                                                    |
|------|------|----------|----------------------------------------------------------------------------------------------------------------------------------------------------------------------------------------------------------------------------------------------------|
|      |      |          | degradation and enhances tumor invasion and metastasis, which highlights the complex role of TIMP-2                                                                                                                                                |
| MMP2 | 4313 | 19088827 | The positive expression of MMP-2 can be used to estimate the metastatic potential of cervical squamous carcinoma.                                                                                                                                  |
| MMP2 | 4313 | 19101987 | Platelet-derived microparticles promote prostate tumor invasiveness, at least in part by stimulation of MMP-2 production                                                                                                                           |
| MMP2 | 4313 | 19105397 | Matrix metalloproteinase 2 and 9 as the factor of head and neck tumor metastasis                                                                                                                                                                   |
| MMP2 | 4313 | 19116140 | The role of MMP-2 and the signaling pathway involved in EGF-promoted invasion by human pancreatic cancer cells PANC-1 was investigated.                                                                                                            |
| MMP2 | 4313 | 19191857 | Expression of MMP-2 in esophageal squamous cell carcinomas was higher than in esophageal epithelium, and higher in the advanced stage; MMP-2 plays an important role in tumor invasion and metastasis of ESCCs.                                    |
| MMP2 | 4313 | 19221481 | The proteolytically active matrix-metalloproteinase (MMP)-2 is upregulated and as an early regulator of ovarian cancer metastasis.                                                                                                                 |
| MMP2 | 4313 | 19241124 | selective COX-2 inhibition suppresses the invasion activity of OSCC cells via down-regulation of an MMP-2-activating mechanism involving TIMP-2 and production of the MMP-2 protein by an interaction between cancer cells and stromal fibroblasts |
| MMP2 | 4313 | 19286653 | Low Levels of MMP-2 due to epigenetic silencing is associated with invasiveness in cancer.                                                                                                                                                         |
| MMP2 | 4313 | 19477063 | curcumin has anti-metastatic potential resulting in inhibition of MMP-2 and -9 in human lung cancer A549 cells.                                                                                                                                    |
| MMP2 | 4313 | 19528914 | MMP2 was found in epidermal and dermal ests of malignant cells and in atypical melanocytes along the hair follicles in lentigo maligna melanoma, indicating its involvement in tumor invasion.                                                     |
| MMP2 | 4313 | 19529860 | High expression of matrix metalloproteinase-2 was less significant for the invasive potential and prognosis of colorectal tumors.                                                                                                                  |
| MMP2 | 4313 | 19577357 | Van Gogh-Like 2 regulates tumor cell migration and matrix metalloproteinase-dependent invasion.                                                                                                                                                    |
| MMP2 | 4313 | 19610062 | High expression of MMP-2 is associated with malignant and invasive skin squamous cell carcinoma growth.                                                                                                                                            |
| MMP2 | 4313 | 19625121 | Up-regulation of MMP-2 and MMP-9 is one of the mechanisms by which Skp2 promotes lung cancer cell invasion.                                                                                                                                        |
| MMP2 | 4313 | 19901964 | Data show that P-cadherin overexpression in breast cancer cells with wild-type E-cadherin promotes cell invasion, motility, and induces the secretion of MMP-1 and MMP-2, which then lead to P-cadherin ectodomain cleavage.                       |
| MMP2 | 4313 | 19930715 | results suggest that PRL-3's roles in motility, invasion, and metastasis in colon cancer are critically controlled by the integrin beta1-ERK1/2-MMP2 signaling                                                                                     |
| MMP2 | 4313 | 19956847 | ICAM-3 enhances the migratory and invasive potential of human non-small cell lung cancer cells by inducing MMP-2 and MMP-9 via Akt and CREB                                                                                                        |
| MMP2 | 4313 | 20372784 | emodin, aloë-emodin and rhein inhibit the protein levels and activities of matrix MMP-2 but not gene expression of MMP-2; they do inhibit gene expression of MMP-9 and migration and invasion of human tongue cancer SCC-4 cells                   |
| MMP2 | 4313 | 20514447 | TGF-beta, leading the tissue invasion mediated by MMP-2, is a strong promoter of tumor progression.                                                                                                                                                |
| MMP2 | 4313 | 20600798 | MMPs are critical targets of diallyl disulfide-induced anti-invasiveness in human prostate cancer LNCaP cells.                                                                                                                                     |
| MMP2 | 4313 | 20646497 | High expression of MMP-2 and IGF-1 proteins is significantly correlated with the invasion and metastasis of gastric carcinoma.                                                                                                                     |
| MMP2 | 4313 | 20646600 | CD147 and MMP-2 play a role in invasion and metastasis of laryngeal carcinoma. Increased levels of MMP-2 and MMP-9 are induced by CD147 in laryngeal tumor cells.                                                                                  |
| MMP2 | 4313 | 20654122 | MMP-2 and MMP-9 in conjunction with VEGF-C, promote lymphangiogenesis and lymph node metastasis of breast cancer.                                                                                                                                  |

|      |      |          |                                                                                                                                                                                                                                                              |
|------|------|----------|--------------------------------------------------------------------------------------------------------------------------------------------------------------------------------------------------------------------------------------------------------------|
| MMP2 | 4313 | 20843706 | metalloproteinase MMP-2 and MMP-9 -to-E-cadherin ratio has an effect on lymphangiogenesis and lymph node metastasis in prostate cancer                                                                                                                       |
| MMP2 | 4313 | 20970160 | results indicate concurrent mechanisms in expression of MMP-2 and -9, RUNX1/AML1 and ETV5/ERM, and several basement membrane components, which likely associate with the invasive stage of endometrioid endometrial and ovarian endometrioid carcinoma.      |
| MMP2 | 4313 | 21045016 | Nicotinamide N-methyltransferase has a crucial role in cellular invasion via activating PI3K/Akt/SP1/MMP-2 pathway in clear cell renal cell carcinoma (ccRCC).                                                                                               |
| MMP2 | 4313 | 21104439 | OPN enhanced hepatocellular carcinoma cells invasion through interaction with its receptor CD44v6 and increased MMP-2 and uPA expressions.                                                                                                                   |
| MMP2 | 4313 | 21104440 | These findings show that CK19 and MMP-2 expression may be beneficial in predicting lymph node metastasis in hepatocellular carcinoma and survival.                                                                                                           |
| MMP2 | 4313 | 21193558 | results suggest GnRH-II-induced laminin receptor precursor expression increases 67-kDa nonintegrin laminin receptor, which appears to interact with laminin in the extracellular matrix to promote MMP-2 expression and enhance ovarian cancer cell invasion |
| MMP2 | 4313 | 21248144 | The effect of estradiol on prostate cancer cell invasiveness via upregulation of MMP2 via a paracrine mechanism is reported.                                                                                                                                 |
| MMP2 | 4313 | 21316839 | The incidence of BAG3 positivity was significantly higher at advanced clinical stages of ovarian cancer than at early stages. It is suggested BAG3 binds to MMP2 to positively regulate the process of cell invasion.                                        |
| MMP2 | 4313 | 21393869 | Overexpression of MMP-2 and MMP-9 are often associated with increased invasive metastatic potential of colorectal adenocarcinoma.                                                                                                                            |
| MMP2 | 4313 | 21461859 | data demonstrate, for the first time, that DDR1 mediates MMP-2 and -9 secretions and invasion induced by native type IV collagen in MDA-MB-231 breast cancer cells                                                                                           |
| MMP2 | 4313 | 21503582 | Gallic acid suppresses the migration and invasion of PC-3 human prostate cancer cells via inhibition of matrix metalloproteinase-2 and -9 signaling pathways                                                                                                 |
| MMP2 | 4313 | 21575462 | Expressions of LOX and MMP-2 in gastric cancer tissues are significantly higher than that in pericancerous tissues, and are also higher in gastric cancer with lymph node metastasis.                                                                        |
| MMP2 | 4313 | 21612407 | The allele frequency of MMP2 rs243865 was not associated with the development of gastric cancer or its lymph node metastases. Epistasis between PARP1 rs1136410 & MMP2 rs243865 increased the risk of LNM of GC.                                             |
| MMP2 | 4313 | 21627988 | HABP1 enhanced melanoma cell migration, leading to MMP-2 activation and tumor growth.                                                                                                                                                                        |
| MMP2 | 4313 | 21637818 | Fluid shear stress in the tumor microenvironment may explain reduced glioma invasion through modulation of cell motility and MMP levels.                                                                                                                     |
| MMP2 | 4313 | 21687932 | Results show that SLPI promotes the metastasis of SNU638 gastric cancer cells by increasing MMP-2 and MMP-9 expression through Elk-1 signaling, indicating its role as a signaling molecule not a protease inhibitor.                                        |
| MMP2 | 4313 | 21842128 | overexpression of serum response factor in hepatocellular carcinoma may play an important role in tumor cell migration and invasion through upregulation of matrix metalloproteinase-2 and matrix metalloproteinase-9                                        |
| MMP2 | 4313 | 21901248 | fibulin-3 negatively modulates the invasiveness of lung cancer cells via regulation of MMP-7 and MMP-2 and its expression is regulated by hypermethylation of the promoter region                                                                            |
| MMP2 | 4313 | 21924036 | CD147 and MMP-2 expression is correlated with the invasion and metastasis of squamous cell carcinoma and adenocarcinoma of the lungs                                                                                                                         |
| MMP2 | 4313 | 21968416 | Matrix metalloproteinase 2 promotes cell growth and invasion in colorectal cancer.(                                                                                                                                                                          |
| MMP2 | 4313 | 21989104 | Taken together, our results suggest that the mechanism of QSOX1-mediated tumor cell invasion is by activation of MMP-2 and MMP-9.                                                                                                                            |

|      |      |          |                                                                                                                                                                                                                                       |
|------|------|----------|---------------------------------------------------------------------------------------------------------------------------------------------------------------------------------------------------------------------------------------|
| MMP2 | 4313 | 22030137 | The role of MMP-2 expression in the prognosis of invasive ductal carcinoma of the breast is rather limited.                                                                                                                           |
| MMP2 | 4313 | 22200661 | ADAM17 contributes to androgen-independent prostate cancer cell invasion by shedding of EGFR ligand TGF-alpha, which subsequently activates the EGFR-MEK-ERK signaling pathway, leading finally to overexpression of MMP-2 and MMP-9. |
| MMP2 | 4313 | 22289521 | These findings suggest that corticotropin-releasing hormone might induce invasion and migration by upregulating MMP-2 and MMP-9 in endometrial cancer.                                                                                |
| MMP2 | 4313 | 22396544 | Leukotriene B4 receptor-2 promotes invasiveness and metastasis of ovarian cancer cells through signal transducer and activator of transcription 3 (STAT3)-dependent up-regulation of matrix metalloproteinase 2                       |
| MMP2 | 4313 | 22519916 | These results suggested that the inhibition on proMMP-2 expression by Liquiritigenin may be through suppression on PI3K/Akt signaling pathway, which in turn led to the inhibition of lung adenocarcinoma A549 cells migration.       |
| MMP2 | 4313 | 22522455 | These data show that overexpression of Aurora-A contributes to the malignancy development of ESCC by enhancing tumor cell invasion as well as MMP-2 activity and expression                                                           |
| MMP2 | 4313 | 22534634 | Enhanced stromal MMP-2 expression in in situ and invasive squamous cell carcinoma relative actinic keratosis suggests role in disease progression.                                                                                    |
| MMP2 | 4313 | 22652796 | hypothesized that BMP2 promotes cancer metastasis by modulating MMP-2 secretion and activity through intracellular ROS regulation and ERK activation in pancreatic cancer                                                             |
| MMP2 | 4313 | 22694915 | basal lamina type IV collagen alpha chains, matrix metalloproteinases-2 and -9 expressions are expressed in oral dysplasia and invasive carcinoma                                                                                     |
| MMP2 | 4313 | 22846578 | This study shows that MZF-1 represses MMP-2 transcription and suggests that this repression may be linked to inhibition of human cervical cancer cell migration and metastasis.                                                       |
| MMP2 | 4313 | 22883193 | LOX, MMP-2, and MMP-9 may have a synergistic role in promoting invasion and metastasis of breast cancer.                                                                                                                              |
| MMP2 | 4313 | 22883459 | MMP-2, MMP-9 and TIMP-2, TIMP-1 may play an important role in the development, progression, invasion and metastasis of non-melanoma skin cancer.                                                                                      |
| MMP2 | 4313 | 22968857 | This data suggests that ETV5 has a significant role in regulating MMP2 expression and therefore matrix resorption in human chondrosarcoma, and thus may be a targetable upstream effector of the metastatic cascade in this cancer.   |
| MMP2 | 4313 | 23038275 | SIRT1 is an important regulator of MMP2 expression, activity, and prostate cancer cell invasion.                                                                                                                                      |
| MMP2 | 4313 | 23134156 | Mere15 inhibits tumor growth via both pro-apoptotic and antimetastasis pathways by reducing MMP2/9 expression.                                                                                                                        |
| MMP2 | 4313 | 23280016 | analysis revealed that MDR1 expression in lymph node was not correlated with MMP-2 expression in lymph node, number of metastasized lymph nodes and tumor size                                                                        |
| MMP2 | 4313 | 23306155 | Derlin-1 is overexpressed in non-small cell lung cancer and promotes invasion by EGFR-ERK-mediated up-regulation of MMP-2 and MMP-9.                                                                                                  |
| MMP2 | 4313 | 23388341 | The high expressions of Mig-7 and MMP-2 in gastric carcinoma tissues may have a synergistic promoting effect on VM formation. VM is closely associated with the invasion, metastasis and poor prognosis of gastric carcinoma.         |
| MMP2 | 4313 | 23544610 | the inhibitory effect of TSA on cancer invasion is mediated through the suppression of HDAC2 expression, and the reduction of MMP-2 and MMP-9 expression induced by HDAC2 may be involved in the anti-invasive effect of TSA          |
| MMP2 | 4313 | 23566884 | Tomatidine inhibits invasion of human lung adenocarcinoma cell A549 by reducing matrix metalloproteinases expression.                                                                                                                 |

|      |      |          |                                                                                                                                                                                                                                           |
|------|------|----------|-------------------------------------------------------------------------------------------------------------------------------------------------------------------------------------------------------------------------------------------|
| MMP2 | 4313 | 23568763 | Daidzein, R- and S-equol inhibit the invasion of MDA-MB-231 human breast cancer cells in part via the down-regulation of MMP-2 expression, with equipotent effects observed for the parent isoflavone daidzein and the equol enantiomers. |
| MMP2 | 4313 | 23577575 | Increased MMP2 expression was found in nasopharyngeal carcinoma. In lymph node metastatic NPC, NPC cells had a higher rate of MMP-2 expression in tumor metastases than in the primary tumor.                                             |
| MMP2 | 4313 | 23685894 | Up-regulation of both MMP-2 and CD44v6 is significantly correlated with the development of lateral cervical lymph node metastasis in patients with papillary thyroid carcinoma.                                                           |
| MMP2 | 4313 | 23696025 | The PAK5-Egr1-MMP2 signaling pathway is a critical regulator of cell migration and invasion in lung cancer cells.                                                                                                                         |
| MMP2 | 4313 | 23705892 | enzyme activity assays confirmed increased MMP-1, -2, and -3 activity in cancer myofibroblasts, and cancer cell migration assays indicated stimulation by MMP-1, -2, and -3 in cancer-associated myofibroblast media.                     |
| MMP2 | 4313 | 23725476 | Suggest that miR-491 is involved in metastasis of hepatocellular carcinoma by blocking epithelial to mesenchymal transition and decreasing MMP2/9 levels.                                                                                 |
| MMP2 | 4313 | 23832737 | S100A4 plays a crucial role in proliferation and migratory, invasive processes in human renal cell cancer by a mechanism involving activation of NF-kB-bcl-2 and NF-kB-MMP-2 pathway                                                      |
| MMP2 | 4313 | 23897811 | HDAC10 suppresses expression of matrix metalloproteinase (MMP) 2 and 9 genes, which are known to be critical for cancer cell invasion and metastasis                                                                                      |
| MMP2 | 4313 | 23902685 | Rab40b mediates trafficking of MMP2/9 during invadopodia formation and metastasis of breast cancer cells.                                                                                                                                 |
| MMP2 | 4313 | 23915071 | Our data indicate that parallel expression of MMP-2 epithelial/stromal cells and p53 may enhance cells invasion and metastasis in ovarian carcinoma.                                                                                      |
| MMP2 | 4313 | 23936390 | miR-29c serves as a tumor metastasis suppressor, which suppresses lung cancer cell adhesion to ECM and metastasis by directly inhibiting integrin beta1 and MMP2 expression                                                               |
| MMP2 | 4313 | 24386189 | POU5F1 enhances the invasiveness of cancer stem-like cells in lung adenocarcinoma by upregulation of MMP-2 expression.                                                                                                                    |
| MMP2 | 4313 | 24395652 | MMP-2 and TIMP-2 might play a role in the process of colorectal cancer invasion and metastasis                                                                                                                                            |
| MMP2 | 4313 | 24479681 | the IL-1beta/p38/AP-1(c-fos)/MMP2 & MMP9 pathway play an important role in metastasis in gastric adenocarcinoma                                                                                                                           |
| MMP2 | 4313 | 24851607 | Comparison of proMMP-2 and prognostic factors revealed a statistically significant correlation between proMMP-2 and age in patients with histologic grade I tumors for invasive ductal breast cancer.                                     |
| MUC4 | 4585 | 14744777 | Inhibition of MUC4 expression suppresses pancreatic tumor cell growth and metastasis                                                                                                                                                      |
| MUC4 | 4585 | 14744777 | MUC4 protein is associated with the metastatic pancreatic cancer phenotype and plays a role in altered growth and behavioral properties of the tumor cell.                                                                                |
| MUC4 | 4585 | 16475027 | Overexpressed in the progression and lymphatic metastasis of prostate cancer.                                                                                                                                                             |
| MUC4 | 4585 | 21889495 | these data indicate that MUC4 plays a key role in proliferative and migrating properties of esophageal cancer cells as well as is a tumor growth promoter.                                                                                |
| MUC4 | 4585 | 22614008 | Cigarette smoke promotes metastasis of pancreatic cancer through alpha7nAChR-mediated MUC4 upregulation.                                                                                                                                  |
| MUC4 | 4585 | 23152882 | The expression of MUC4 as well as MUC1 in early gastric cancers is a useful marker to predict poor prognostic factors related with vessel invasion.                                                                                       |
| MUC4 | 4585 | 23860190 | Our data suggest that MUC4 appears to be a sensitive and specific marker for differentiating between metastatic adenocarcinoma cells and reactive mesothelial cells in effusion fluids                                                    |

|        |      |          |                                                                                                                                                                                                                                                                                                                                                |
|--------|------|----------|------------------------------------------------------------------------------------------------------------------------------------------------------------------------------------------------------------------------------------------------------------------------------------------------------------------------------------------------|
| MUC4   | 4585 | 24037917 | our study reveals a novel role for MUC4 in suppressing EMT and suggests that the assessment of MUC4 may function as a prognostic biomarker and could be a potential therapeutic target for lung adenocarcinoma metastasis.                                                                                                                     |
| MUC4   | 4585 | 24047396 | MUC4 was observed in both primary pancreatic ductal adenocarcinoma (PDAC) tumors and matched lymph node metastases with a high level of concordance, suggesting that MUC4 expression is retained following PDAC metastasis.                                                                                                                    |
| MUC4   | 4585 | 24374017 | MUC4-induced nuclear translocation of beta-catenin is a novel mechanism for growth, metastasis and angiogenesis of pancreatic cancer.                                                                                                                                                                                                          |
| MUC6   | 4588 | 16475027 | Overexpressed in the progression and lymphatic metastasis of prostate cancer.                                                                                                                                                                                                                                                                  |
| MUC6   | 4588 | 16807756 | Down-regulation of MUC6 may contribute to malignant transformation of gastric epithelial cells and underlie the molecular bases of growth, invasion, metastasis and differentiation of gastric carcinoma.                                                                                                                                      |
| MUC6   | 4588 | 21851820 | results suggest that MUC6 may inhibit invasion of tumor cells through the basement membrane of the pancreatic duct and slow the development of infiltrating carcinoma.                                                                                                                                                                         |
| NCAM1  | 4684 | 16211277 | NCAM is associated not only with a cell-to-cell adhesion mechanism, but also with tumorigenesis, including growth, development and perineural invasion in human salivary gland tumors                                                                                                                                                          |
| NCAM1  | 4684 | 17181871 | Neuroblastoma cells resistant to anticancer drugs have increased invasive capacity caused by down-regulation of NCAM adhesion receptor.                                                                                                                                                                                                        |
| NCAM1  | 4684 | 17982624 | NCAM expression may be used as a predictor of perineural invasion in adenoid cystic carcinoma                                                                                                                                                                                                                                                  |
| NCAM1  | 4684 | 23015367 | Bioinformatic analysis of NCAM-associated expression profiles predicted a highly interactive protein network, which further implies potential molecular mechanisms underlying the metastatic processes of thyroid cancer                                                                                                                       |
| NFYC   | 4802 | 22104449 | NFY-C expression was elevated in colorectal adenocarcinomas; moreover, NFY-C mRNA levels correlated with time to disease progression, while NFY-C protein expression was significantly higher in metastatic disease                                                                                                                            |
| OPCML  | 4978 | 17109515 | The results were confirmed at the level of mRNA and protein, and suggested that four genes (OPCML, RNASE1, YES1 and ACK1) could play a key role in the tumorigenesis and metastasis of gastric cancer.                                                                                                                                         |
| PDGFRB | 5159 | 16007172 | alpha-PDGFR expression might identify prostate cancer cells with the highest propensity to metastasize to the skeleton                                                                                                                                                                                                                         |
| PDGFRB | 5159 | 19636022 | Phase I dose escalation study of telatinib, a tyrosine kinase inhibitor of vascular endothelial growth factor receptor 2 and 3, platelet-derived growth factor receptor beta, and c-Kit, in patients with advanced or metastatic solid tumors.                                                                                                 |
| PDGFRB | 5159 | 20624165 | Data indicate that secretion of PDGF-B by gastric carcinoma cells and expression of PDGF-Rbeta by tumor-associated stromal cells are associated with lymphatic metastasis.                                                                                                                                                                     |
| PDGFRB | 5159 | 21118571 | PDGF-B, which is involved in the maintenance of microvessels, plays an important role in angiogenesis in intestinal-type gastric carcinomas. Phosphorylation of PDGFR-beta was correlated with depth of cancer invasion.                                                                                                                       |
| PDGFRB | 5159 | 24725405 | Study combined several orthogonal approaches and models to explore the basis whereby mutant p53 promotes invasion and metastasis in pancreatic ductal adenocarcinoma (PDAC) and identified the PDGFRb as necessary and sufficient to mediate the effects of mutant p53 on invasion and metastasis in both a murine model and human PDAC cells. |

|        |      |          |                                                                                                                                                                                                                                                               |
|--------|------|----------|---------------------------------------------------------------------------------------------------------------------------------------------------------------------------------------------------------------------------------------------------------------|
| PDGFRB | 5159 | 24769756 | Increased expression of platelet-derived growth factor receptor-beta in pancreatic cancer cells is mediated by DNA binding and structural mutants of p53 and that this contributes to metastasis                                                              |
| PIK3CA | 5290 | 15950905 | Amino acid substitutions in PIK3CA from human colorectal cancer cell lines constitutively activate the AKT pathway, and consequently, promote tumor cell growth and invasion.                                                                                 |
| PIK3CA | 5290 | 16788758 | Increased expression for PIK3CA mrna is associated with regional lymph node metastasis in esophageal squamous cell carcinoma                                                                                                                                  |
| PIK3CA | 5290 | 17062663 | PIK3CA may serve as a marker of invasion in endometrial cancer.                                                                                                                                                                                               |
| PIK3CA | 5290 | 17546593 | Data suggest that PIK3CA mutations contribute to the invasion step from intramucosal carcinoma to invasive carcinoma in colorectal carcinogenesis.                                                                                                            |
| PIK3CA | 5290 | 18084252 | PIK3CA mutations are associated with myometrial invasion and tumors with PIK3CA mutations in exon 20 are frequently high-grade, invasive endometrial carcinomas.                                                                                              |
| PIK3CA | 5290 | 18183466 | PIK3CA mutations are common in invasive ductal carcinomas of the breast and PIK3CA exon 20 mutation is an independent risk factor for poor prognosis in breast cancer patients.                                                                               |
| PIK3CA | 5290 | 18852163 | strong genetic evidence supporting a role of the PI3K/AKT signaling pathway in the tumorigenesis of pituitary tumors, particularly the invasive types                                                                                                         |
| PIK3CA | 5290 | 18990689 | ARF1 regulates epidermal growth factor-dependent breast cancer cell growth and invasion during cancer progression by controlling the activation of the phosphatidylinositol 3-kinase pathway                                                                  |
| PIK3CA | 5290 | 19366826 | PIK3CA mutations are not a major determinant of resistance to the epidermal growth factor receptor inhibitor cetuximab in metastatic colorectal cancer.                                                                                                       |
| PIK3CA | 5290 | 19418217 | complete concordance of PIK3CA and AKT1 mutations in matched samples of invasive and in situ tumor indicates that these mutations occur early in breast cancer development                                                                                    |
| PIK3CA | 5290 | 19603024 | PIK3CA (P=0.01) mutations predicted reduced progress free survival in response to cetuximab salvage therapy in patients with metastatic colorectal cancer .                                                                                                   |
| PIK3CA | 5290 | 20107891 | PIK3CA mutations were detected in 13/46 (28%) plasma-derived and 10/46 (21%) serum-derived cfDNA samples from metastatic breast cancer patients.                                                                                                              |
| PIK3CA | 5290 | 20551053 | Results suggest that mutation of PIK3CA is an early event in breast cancer that is more likely to play a role in breast tumor initiation than in invasive progression. A role for exon 9 mutations in the progression of a subset of DCIS cannot be excluded. |
| PIK3CA | 5290 | 20619739 | if KRAS is not mutated, assessing BRAF, NRAS, and PIK3CA exon 20 mutations (in that order) gives additional information about the efficacy of cetuximab plus chemotherapy in metastatic colorectal cancer.                                                    |
| PIK3CA | 5290 | 20813970 | PIK3CA mutation is associated with poor trastuzumab response in HER2-positive metastatic breast cancer.                                                                                                                                                       |
| PIK3CA | 5290 | 20954287 | Up-regulation of PIK3CA may promote the metastasis of gastric cancer through aberrant activation of PI3K/Akt.                                                                                                                                                 |
| PIK3CA | 5290 | 21209852 | the PI3K/PAK1/ERK signaling pathway has a role in LPA-stimulated breast cancer cell migration                                                                                                                                                                 |
| PIK3CA | 5290 | 21424126 | data indicated that colorectal cancers with KRAS and PIK3CA bi-mutations are more likely to develop into liver metastasis                                                                                                                                     |
| PIK3CA | 5290 | 21490305 | PIK3CA mutations were detected in 19 (40%) of primary tumors and 21 (42%) of metastases                                                                                                                                                                       |
| PIK3CA | 5290 | 21594665 | PIK3CA activating mutations and and PTEN loss is associated with less efficacy of trastuzumab therapy in metastatic breast cancer                                                                                                                             |
| PIK3CA | 5290 | 21617917 | Demonstrate the presence of PIK3CA and AKT1(E17K) mutations from pre-invasive to invasive to metastatic breast cancer tissue.                                                                                                                                 |



|        |      |          |                                                                                                                                                                                                                                                                |
|--------|------|----------|----------------------------------------------------------------------------------------------------------------------------------------------------------------------------------------------------------------------------------------------------------------|
| PIK3CA | 5290 | 21708979 | PI3K signaling via p110alpha regulates invadopodia-mediated invasion of breast cancer cells.                                                                                                                                                                   |
| PIK3CA | 5290 | 22039088 | PIK3CA exon 20 mutations may be a potential biomarker for resistance to anti-EGFR monoclonal antibodies in KRAS wild-type metastatic colorectal cancer.<br>[Review and meta-analysis]                                                                          |
| PIK3CA | 5290 | 22285706 | loss of PTEN expression (by immunohistochemistry) and PIK3CA mutation is likely to be predictive of a lack of benefit to anti-EGFR therapy in metastatic colorectal cancer                                                                                     |
| PIK3CA | 5290 | 22330809 | PIK3CA mutation was associated with significantly longer metastasis-free survival in breast cancer patients.                                                                                                                                                   |
| PIK3CA | 5290 | 22460814 | PIK3CA mutations were identified in 13/24 columnar cell lesions (54%) and 3/8 invasive carcinomas (37%).                                                                                                                                                       |
| PIK3CA | 5290 | 22737248 | analysis of multiorgan metastasis of human HER-2+ breast cancer in Rag2 <sup>-/-</sup> ;Il2rg <sup>-/-</sup> mice and treatment with PI3K inhibitor                                                                                                            |
| PIK3CA | 5290 | 22851869 | PI3K expression and PIK3CA mutations are related to colorectal cancer metastases                                                                                                                                                                               |
| PIK3CA | 5290 | 22870241 | High-throughput genotyping in metastatic esophageal squamous cell carcinoma identifies phosphoinositide-3-kinase and BRAF mutations.                                                                                                                           |
| PIK3CA | 5290 | 22994622 | Data indicate that copy number amplification of the PIK3CA gene is associated with poor prognosis in head and neck squamous cell carcinoma (HNSCC) patients without lymph node metastasis.                                                                     |
| PIK3CA | 5290 | 23352210 | The rate of PIK3CA mutations in this series of micropapillary carcinomas is similar to invasive ductal carcinomas; however, there may be an enrichment of AKT1 mutations.                                                                                      |
| PIK3CA | 5290 | 23615713 | Results show that stromal cell-derived factor-1 (SDF-1) enhanced ovarian cancer cell invasion through alphavbeta6 integrin-mediated urokinase-type plasminogen activator (uPA) expression via the p38 MAPK and PI3 K/Akt pathway.                              |
| PIK3CA | 5290 | 23884447 | Among 30 breast tumors, 10(33%) had BCSCs with AKT1, HRAS, or PIK3CA mutations. 3 mutations were detected in PIK3CA. Tumors in which BCSCs have defects in PI3K/Akt signaling are significantly more likely to manifest nodal metastases.                      |
| PIK3CA | 5290 | 24320611 | The Pik3ca(H1047R) mutation promotes the development of highly aggressive and invasive adenocarcinomas in intestine.                                                                                                                                           |
| PIK3CA | 5290 | 24328409 | Low expression of miR-1 and high expression of PIK3CA are closely related to the invasion, progression and metastasis of non-small-cell lung cancer. There is a negative correlation between the expression of miR-1 and PIK3CA in non-small-cell lung cancer. |
| PIN1   | 5300 | 19885590 | overexpression of Pin-1 and VEGF-C may promote tumor progression and metastasis                                                                                                                                                                                |
| PIN1   | 5300 | 19920136 | the importance of Pin1 in TGF-beta-induced migration and invasion of cancer cells                                                                                                                                                                              |
| PIN1   | 5300 | 20009523 | High expression of Pin1 correlated with poor survival in NSCLC patients. Overexpression of Pin1 in Glc82 cells increased cell growth and colony formation and tumorigenicity in nude mice including cell migration, invasion.                                  |
| PKD1   | 5310 | 18283041 | propose that PKD1 is frequently silenced by epigenetic regulation, which plays a role in cell migration and metastasis in gastric cancer                                                                                                                       |
| PLEC   | 5339 | 18084872 | results reveal that plectin is up-regulated in colorectal adenocarcinoma as well as in bizarre glands and locally invasive tumor nests in tubular adenoma, compared with normal colorectal mucosa                                                              |
| PLEC   | 5339 | 21821021 | plectin participates in actin assembly and invasiveness in carcinoma cells in an isoform-specific manner                                                                                                                                                       |
| PLEC   | 5339 | 22245045 | findings suggest that plectin promotes the migration and invasion of head and neck squamous cell carcinoma (HNSCC) cells through activation of Erk 1/2 kinase                                                                                                  |

|       |      |          |                                                                                                                                                                                                                                                               |
|-------|------|----------|---------------------------------------------------------------------------------------------------------------------------------------------------------------------------------------------------------------------------------------------------------------|
|       |      |          | and is a potential prognostic biomarker of HNSCC.                                                                                                                                                                                                             |
| PRSS3 | 5646 | 20947888 | PRSS3 plays an important role in the progression, metastasis and prognosis of human pancreatic cancer.                                                                                                                                                        |
| PTCH1 | 5727 | 22407314 | Expressions of Shh, Ptch1 and Gli1 were significantly correlated with stage, lymph node metastasis, venous invasion, hepatic infiltration, survival rate, and lymphatic invasion in gallbladder carcinoma.                                                    |
| PTCH1 | 5727 | 24335643 | Case Report: identical PTCH1 mutations in epithelial and sarcomatoid primary tumor components and sarcomatoid metastasis of basal cell carcinosarcoma.                                                                                                        |
| PTCH1 | 5727 | 24961235 | MiR-212 may facilitate pancreatic ductal adenocarcinoma progression and metastasis through targeting PTCH1.                                                                                                                                                   |
| PTEN  | 5728 | 11896207 | Abnormalities of the PTEN gene are associated with tumor progression, metastasis, and survival.                                                                                                                                                               |
| PTEN  | 5728 | 12687015 | overexpression of RRM1 in human and mouse lung cancer cell lines induced PTEN expression, reduced phosphorylation of focal adhesion kinase (FAK), suppressed migration, invasion, and metastasis formation, and increased survival in an animal model.        |
| PTEN  | 5728 | 12767263 | Data suggest that PTEN tumor suppressor gene malfunction seems to be involved in metastasing capacity of hepatocellular carcinoma.                                                                                                                            |
| PTEN  | 5728 | 14674989 | Loss of PTEN expression is common and correlates with tumor progression and lymph node metastasis in breast carcinoma.                                                                                                                                        |
| PTEN  | 5728 | 14976311 | results show that PTEN can inhibit cell migration through its C2 domain, independent of its lipid phosphatase activity; ability of PTEN to control cell migration through its C2 domain is likely to be an important feature of its tumor suppressor activity |
| PTEN  | 5728 | 15129904 | a role of these tumor suppressor and metastasis suppressor genes in the evolution and progression of NSCLC                                                                                                                                                    |
| PTEN  | 5728 | 15551732 | reduced PTEN expression may be an independent prognostic indicator in patients with invasive ductal carcinoma.                                                                                                                                                |
| PTEN  | 5728 | 15633233 | PTEN mutations are restricted to advanced gastric cancer, loss of heterozygosity and mutation of PTEN gene are closely related to the infiltration and metastasis of gastric cancer.                                                                          |
| PTEN  | 5728 | 16020969 | Reduced expression of PTEN protein correlated with lymph node metastases in the patients with breast cancer                                                                                                                                                   |
| PTEN  | 5728 | 16739377 | Hypermethylation of PTEN gene promoter is associated with loss of its transcription in laryngeal squamous cell carcinoma, and may be related to lymph node metastasis.                                                                                        |
| PTEN  | 5728 | 17347137 | loss of PTEN function in human prostate cancer may specifically facilitate bone rather than other organ metastasis and suggest that Rac1, as a PTEN effector, may contribute to this metastatic tropism.                                                      |
| PTEN  | 5728 | 17441421 | The protein expression of PTEN was correlated with clinical stage, tumor differentiation grade, and cervical lymph node metastasis in laryngeal squamous cell carcinoma                                                                                       |
| PTEN  | 5728 | 17452630 | aberrant PI3K pathway signaling is strongly associated with metastasis and poor survival across carcinoma types                                                                                                                                               |
| PTEN  | 5728 | 17593340 | Metastasis of renal cell carcinoma is correlated with inactivation of PTEN.                                                                                                                                                                                   |
| PTEN  | 5728 | 17669465 | Increased promoter methylation of PTEN was present in renal metastasis (of breast cancer), coinciding with the decrease in the level of normal PTEN transcript                                                                                                |
| PTEN  | 5728 | 17880912 | PTEN plays a critical role in MAGI-2-induced inhibition of cell migration and proliferation in human hepatocarcinoma cells                                                                                                                                    |
| PTEN  | 5728 | 18239055 | In pancreatic tumor cells calcium-dependent PKC-alpha mediates TGF-beta-induced transcriptional downregulation of PTEN, and this pathway promotes cell migration in a SMAD4-null environment.                                                                 |

|      |      |          |                                                                                                                                                                                                                                                               |
|------|------|----------|---------------------------------------------------------------------------------------------------------------------------------------------------------------------------------------------------------------------------------------------------------------|
| PTEN | 5728 | 18383208 | Increased PTEN expression was associated with invasive adenocarcinoma of the prostate                                                                                                                                                                         |
| PTEN | 5728 | 18720079 | The expression of metastasis inhibitor genes PTEN and thrombospondin 2 was down-regulated in the supraglottic carcinoma tissue with lymph node metastasis.                                                                                                    |
| PTEN | 5728 | 19036165 | Loss of PTEN expression is associated with colorectal cancer liver metastasis and poor patient survival.                                                                                                                                                      |
| PTEN | 5728 | 19261747 | combined deletion of p53 and Pten in bladder epithelium leads to invasive cancer in a novel mouse model. Inactivation of p53 and PTEN promotes tumorigenesis in human bladder cells and is correlated with poor survival in human tumors.                     |
| PTEN | 5728 | 19560785 | The IGF-1/PI3K/PTEN/Akt/NF-small ka, CyrillicB cascade may be a key pathway stimulating metastasis of pancreatic cancer cells.                                                                                                                                |
| PTEN | 5728 | 19940030 | The TGF-beta/NF-kappaB/PTEN cascade may be a critical pathway for pancreatic cancer cells to proliferate and metastasize                                                                                                                                      |
| PTEN | 5728 | 19962668 | show that miR-221&222, by targeting PTEN and TIMP3 tumor suppressors, induce TRAIL resistance and enhance cellular migration through the activation of the AKT pathway and metallopeptidases                                                                  |
| PTEN | 5728 | 20032390 | Study supports clinical studies identifying an association of PTEN loss with late stage cancer. Cellular factors secreted from the surrounding tumor milieu act in concert with genetic changes in the tumor cells and contribute to enhanced tumor invasion. |
| PTEN | 5728 | 20226014 | Data show that the coexpression of HSP90 with PI3K-p110alpha or expression of HSP90 along with PTEN loss has a potential as a molecular prognostic marker to predict early relapse in patients with invasive breast cancers.                                  |
| PTEN | 5728 | 20407866 | PTEN gene was significantly linked with the progression and metastasis of gastrointestinal stromal tumors.                                                                                                                                                    |
| PTEN | 5728 | 20813970 | PTEN loss is associated with poor trastuzumab response in HER2-positive metastatic breast cancer.                                                                                                                                                             |
| PTEN | 5728 | 21029699 | The overexpression of bFGF and underexpression of PTEN are closely related to the invasion and growth of cervical carcinoma.                                                                                                                                  |
| PTEN | 5728 | 21104017 | Data show that MiR-21 was overexpressed in vitro and esophageal squamous cell carcinoma, and promoted the cell proliferation, might target PTEN at post-transcriptional level, and regulated the cancer invasion in Kazakh's ESCC.                            |
| PTEN | 5728 | 21151099 | The combined deregulation of the pVHL/HIF axis and PTEN alone appear to be important for multilocular cystic renal cell carcinoma development but not sufficient to drive metastatic processes.                                                               |
| PTEN | 5728 | 21155011 | Data show that KRAS mutation and PTEN protein expression are significantly correlated with the response rate and survival time of Chinese metastatic colorectal cancer patients treated with cetuximab.                                                       |
| PTEN | 5728 | 21203412 | PTEN controls cellular polarity, establishment of cell-cell junctions, paracellular permeability, migration and tumorigenic/metastatic potential of human colorectal cancer cells                                                                             |
| PTEN | 5728 | 21206972 | Migration of renal tumor cells depends on dephosphorylation of Shc by PTEN.                                                                                                                                                                                   |
| PTEN | 5728 | 21333374 | augments invasiveness and growth of lung cancer cells through the PI3K/AKT/NFkB pathway                                                                                                                                                                       |
| PTEN | 5728 | 21490305 | PTEN was lost in 14 (30%) primary tumors and 13 (25%) metastases                                                                                                                                                                                              |
| PTEN | 5728 | 21575512 | PTEN may suppress the invasive and migration ability of the ovarian cancer cell line A2780, possibly by downregulating MMP9.                                                                                                                                  |
| PTEN | 5728 | 21685691 | MAGI1 may inhibit the cancer cell migration and invasion of hepatocellular carcinoma via regulating PTEN.                                                                                                                                                     |
| PTEN | 5728 | 21696297 | Metastases in most subcellular compartments showed comparable and stronger expression for pAKT, pmTOR, and PTEN than primary renal cell carcinomas                                                                                                            |

|      |      |          |                                                                                                                                                                                                                                                                    |
|------|------|----------|--------------------------------------------------------------------------------------------------------------------------------------------------------------------------------------------------------------------------------------------------------------------|
|      |      |          | (PRCCs).                                                                                                                                                                                                                                                           |
| PTEN | 5728 | 21881486 | PTEN loss seems to be an early event during tumorigenesis in primary and metastatic clear cell renal cell carcinomas.                                                                                                                                              |
| PTEN | 5728 | 22036936 | results suggest that a high level of PTEN expression is associated with low-grade liver metastasis and satisfactory patient survival in pancreatic cancer                                                                                                          |
| PTEN | 5728 | 22240798 | Loss of PTEN expression was present in 59 out of 273 carcinomas and was significantly correlated to genomic PTEN deletion, high-grade malignancy, increased tumour size (P=0.036), lymph node metastases (P=0.007) and worse disease-specific survival             |
| PTEN | 5728 | 22267008 | microRNA-21 promotes tumor proliferation and invasion in gastric cancer by targeting PTEN.                                                                                                                                                                         |
| PTEN | 5728 | 22279049 | IGF2BP1 promotes the velocity and directionality of tumor-derived cell migration by determining the cytoplasmic fate of two novel target mRNAs: MAPK4 and PTEN                                                                                                     |
| PTEN | 5728 | 22285706 | loss of PTEN expression (by immunohistochemistry) and PIK3CA mutation is likely to be predictive of a lack of benefit to anti-EGFR therapy in metastatic colorectal cancer                                                                                         |
| PTEN | 5728 | 22350410 | Pten loss and RAS/MAPK activation cooperate to promote EMT and metastasis initiated from prostate cancer stem/progenitor cells.                                                                                                                                    |
| PTEN | 5728 | 22375056 | PTEN protein phosphatase activity correlates with control of gene expression and invasion, a tumor-suppressing phenotype, but not with AKT activity.                                                                                                               |
| PTEN | 5728 | 22429330 | PTEN mRNA expression was significantly downregulated in brain metastases compared with primary breast tumors, and PTEN mutations were frequently found in brain metastases.                                                                                        |
| PTEN | 5728 | 22552802 | This study concludes that the abnormal methylation of PTEN gene promoter CpG islands exists in the colorectal tumors and metastases.                                                                                                                               |
| PTEN | 5728 | 22639407 | Genomic PTEN deletion is a rare event in gastric adenocarcinoma but correlates with metastatic disease. The homogeneous distribution pattern indicates that this alteration occurs early in tumour development.                                                    |
| PTEN | 5728 | 22885155 | Our study demonstrated that miR-26a enhanced lung cancer cell metastasis potential via modulation of metastasis-related gene expression, and activation of AKT pathway by PTEN suppression                                                                         |
| PTEN | 5728 | 23104175 | these results suggest that Sp1 is involved in the development and invasiveness of cancer through inhibition of PTEN                                                                                                                                                |
| PTEN | 5728 | 23319441 | analysis of PTEN status in 135 sporadic invasive ductal carcinomas reveals that relapsed tumors are associated with a specific, complex DNA profile at the PTEN locus with a strikingly similar highly rearranged pan-genomic profile                              |
| PTEN | 5728 | 23574264 | In HER2-positive recurrent or metastatic breast cancer patients PTEN loss might indicate resistance to trastuzumab-based salvage treatment.                                                                                                                        |
| PTEN | 5728 | 23617834 | MicroRNA-32 (miR-32) regulates phosphatase and tensin homologue (PTEN) expression and promotes growth, migration, and invasion in colorectal carcinoma cells.                                                                                                      |
| PTEN | 5728 | 23623571 | Reactivation of PTEN tumor suppressor pathway leads to a 50% reduction in colorectal cancer metastasis without affecting primary tumor formation.                                                                                                                  |
| PTEN | 5728 | 23670029 | Patients with mtp53 tumors were older at diagnosis, had more incidence of liver metastasis, and more frequent PTEN loss.                                                                                                                                           |
| PTEN | 5728 | 24133589 | Found progressive loss of PTEN and increase in EGFR, TGF-alpha, P-AKT expression from benign samples to non small cell lung cancer. Changes were correlated to differentiation extent of cancer tissue, metastasis of lymph nodes and histological classification. |
| PTEN | 5728 | 24156022 | PTEN expression is consistent in colorectal cancer primaries and metastases and associates with patient survival.                                                                                                                                                  |
| PTEN | 5728 | 24286315 | miR-221 may promote trastuzumab resistance and metastasis of HER2-positive breast cancers by targeting PTEN, suggesting its role as a potential biomarker for                                                                                                      |

|       |      |          |                                                                                                                                                                                                                                                                |
|-------|------|----------|----------------------------------------------------------------------------------------------------------------------------------------------------------------------------------------------------------------------------------------------------------------|
|       |      |          | progression and poor prognosis                                                                                                                                                                                                                                 |
| PTEN  | 5728 | 24532253 | Lipopolysaccharide induced miR-181a promotes pancreatic cancer cell migration via targeting PTEN and MAP2K4.                                                                                                                                                   |
| PTEN  | 5728 | 24599953 | conclude that cross-talk between PTEN and PHLPPs is silenced in normal prostate cells but activated in TGF-beta1 transformed prostate stem and cancer cells and facilitates invasive growth                                                                    |
| PTEN  | 5728 | 24842611 | cancer associated fibroblasts with down-regulated miR-106b could significantly inhibit gastric cancer cell migration and invasion by targeting PTEN                                                                                                            |
| RET   | 5979 | 14586073 | Point mutation in exon 14 at codon 804 of the RET proto-oncogene locus in a case of lymph node metastases of medullary and papillary thyroid carcinoma.                                                                                                        |
| RET   | 5979 | 17270543 | Children of families with RET cysteine mutations may develop early metastatic medullary carcinoma of the thyroid gland.                                                                                                                                        |
| RET   | 5979 | 18316596 | a beta-catenin-RET kinase pathway is a critical contributor to the development and metastasis of thyroid carcinoma                                                                                                                                             |
| RET   | 5979 | 20801952 | RET S836S variant is associated with early onset and increased risk for metastatic disease in patients with hereditary or sporadic hereditary or sporadic medullary thyroid carcinoma.                                                                         |
| RET   | 5979 | 23868506 | Authors show that elevated levels of Ret receptor are found in different sub-types of human breast cancers and that high Ret correlates with decreased metastasis-free survival.                                                                               |
| RET   | 5979 | 24778213 | These findings collectively demonstrate that GFRalpha1 released by nerves enhances perineural invasion through GDNF-RET signaling and that GFRalpha1 expression by cancer cells enhances but is not required for it.                                           |
| ROBO1 | 6091 | 19706539 | Data uncover a previously unknown function of USP33 and reveal a new player in Slit-Robo signaling in cancer cell migration.                                                                                                                                   |
| ROBO1 | 6091 | 20300657 | These results describe a Slit-miR-218-Robo1 regulatory circuit whose disruption may contribute to gastric cancer metastasis.                                                                                                                                   |
| ROBO1 | 6091 | 20438712 | these findings reveal that through interacting with Robo1, Slit2 is a novel and potent lymphangiogenic factor and contributes to tumor lymphatic metastasis.                                                                                                   |
| ROBO1 | 6091 | 21465248 | three major members (Slit2/3 and Robo1) of Slit/Robo family are widely expressed in the human normal and malignant ovarian tissues; but Slit/Robo signaling may not play an important role in regulating human ovarian cancer cell proliferation and migration |
| ROBO1 | 6091 | 21875486 | Robo1 expression correlates negatively with invasive ductal carcinoma brain metastasis, and correlates positively with the age and prognosis of IDC patients.                                                                                                  |
| ROBO1 | 6091 | 22898079 | breast cancer cell migration and invasion was promoted when miRNA- 218 was significantly down regulated, in the way of up-regulation of Robo1.                                                                                                                 |
| ROBO1 | 6091 | 23953227 | Low Robo1 expression was associated with cell proliferation and migration in ICC and was one of the adverse prognostic factors in patients with these tumors.                                                                                                  |
| ROS1  | 6098 | 23549810 | ROS1 expression is significantly lower in proportion to higher histologic grade, higher mitotic counts, lower estrogen receptor expression, and a higher Ki-67 proliferation index in invasive ductal carcinoma of the breast.                                 |
| ROS1  | 6098 | 23810364 | ROS1 gene rearrangements are associated with metastatic non--small-cell lung cancer.                                                                                                                                                                           |
| RRAS  | 6237 | 12548599 | the oncogene R-Ras promotes tumor growth of cervical epithelial cells and increases their migration potential over collagen through a pathway that involves PI 3-K.                                                                                            |
| SCN5A | 6331 | 16061851 | Up-regulation of neonatal Nav1.5 occurs as an integral part of the metastatic process in human breast cancer                                                                                                                                                   |
| SCN5A | 6331 | 19224165 | Nav1.5 functional expression potentiated the invasive behavior of human breast cancer cell line MDA-MB-231 by increasing the secretion of MMP-9.                                                                                                               |
| SCN5A | 6331 | 20372843 | Abnormal expression of Nav1.5 could be an integral component of the metastatic process in human ovarian cancer.                                                                                                                                                |
| SCN5A | 6331 | 20651255 | Data established a role of SCN5A as a regulator of a colon cancer invasion network, involving genes that encompass Wnt signaling, cell migration, ectoderm                                                                                                     |

|       |      |          |                                                                                                                                                                                                                                                           |
|-------|------|----------|-----------------------------------------------------------------------------------------------------------------------------------------------------------------------------------------------------------------------------------------------------------|
|       |      |          | development, response to biotic stimulus, steroid metabolic process, and cell cycle control.                                                                                                                                                              |
| SCN5A | 6331 | 21170089 | Na(V)1.5 and NHE1 are functionally coupled and enhance the invasiveness of cancer cells by increasing H(+) efflux.                                                                                                                                        |
| CCL24 | 6369 | 17908961 | eotaxin-2 is a chemokine strongly associated with primary and metastatic tumors of colorectal origin                                                                                                                                                      |
| SMTN  | 6525 | 20636795 | Smoothelin immunohistochemistry has diagnostic utility in the evaluation of muscularis propria invasion in urothelial carcinoma.                                                                                                                          |
| SOX2  | 6657 | 16596179 | Increased SOX2 is associated with the pancreatobiliary phenotype of ampulla of Vater carcinoma and involved in later events in carcinogenesis, such as invasion and metastasis                                                                            |
| SOX2  | 6657 | 19554373 | High SOX2 is correlated with lymph node metastasis in colorectal cancer.                                                                                                                                                                                  |
| SOX2  | 6657 | 22184289 | Glioblastoma multiforme tissue grade IV specimens showed significant expression of Twist1 and Sox2, known mesenchymal and stemness related markers, respectively, indicating their association with glial tumor genesis and metastasis.                   |
| SOX2  | 6657 | 22236193 | study reported that, in the univariate analysis, SOX2 expression was correlated with a poorer distant metastasis-free survival in nasopharyngeal carcinoma patients                                                                                       |
| SOX2  | 6657 | 23005595 | The results indicate that high expression rates of SOX2 might be a prediction marker for oral squamous cell carcinoma lymph node metastasis.                                                                                                              |
| SOX2  | 6657 | 23307254 | Our data suggested for the first time that the high expression of Sox2 may contribute to the development of non-muscle-invasive bladder cancer                                                                                                            |
| SOX2  | 6657 | 23414798 | Data indicate that sex determining region Y (SRY)-box 2 (SOX2) up-regulation is frequent in early squamous cell carcinomas of the oral cavity and associated with decreased risk of lymphatic metastasis.                                                 |
| SOX2  | 6657 | 23430442 | A high level of Sox2 expression correlates with metastasis and low survival rate of patients with hepatocellular carcinoma.                                                                                                                               |
| SOX2  | 6657 | 23815808 | Sox2 regulates the invasiveness of breast cancer cells via a mechanism that is dependent on Twist1 and the transcriptional status of Sox2                                                                                                                 |
| SOX2  | 6657 | 23895273 | The SOX2-FN1 axis is a key pathway in mediating the migration and invasion of ovarian cancer cells                                                                                                                                                        |
| SOX2  | 6657 | 24382260 | SOX2 was detected in 19.0% (105 of 552) of invasive breast carcinomas and 12.3% (seven of 57) of DCIS. Expression correlated with larger tumour size (P = 0.005) and higher grade (P = 0.002).                                                            |
| ST14  | 6768 | 14584072 | Cervical carcinoma cells expressed high levels of TADG-15, suggesting that this protease may play an important role in invasion and metastasis.                                                                                                           |
| ST14  | 6768 | 14747469 | matriptase is downregulated through suppression of activation of receptor-bound pro-urokinase, and leads to inhibition of tumor invasion                                                                                                                  |
| ST14  | 6768 | 16237759 | SNC19/ST14 gene overexpression could enhance invasion of colorectal cancer cells in vitro significantly and influence early cell adherence to ECM, but could not change cell movement significantly.                                                      |
| ST14  | 6768 | 17456594 | overexpression of MSP, MT-SP1, and MST1R was a strong independent indicator of both metastasis and death in human breast cancer                                                                                                                           |
| ST14  | 6768 | 18649735 | Overexpression of bikunin reduced the gene expression of matriptase, which attenuated in vitro cell invasion. Different metastatic characteristics between PC-3 and PC-J cells suggest that matriptase plays a role in the metastasis of prostate cancer. |
| ST14  | 6768 | 20145119 | MT-SP1 activity as a useful biomarker to visualize epithelial cancers using a noninvasive antibody-based method.                                                                                                                                          |
| ST14  | 6768 | 20971737 | ErbB-2 signaling via the phosphatidylinositol 3-kinase pathway results in up-regulated matriptase zymogen activity, which contributes to prostate cancer cell invasion.                                                                                   |
| ST14  | 6768 | 21097670 | Epithin, which regulates endothelial Tie2 functions, plays a critical role in the fine tuning of transendothelial migration for normal and cancer cells.                                                                                                  |

|        |      |          |                                                                                                                                                                                                                                                           |
|--------|------|----------|-----------------------------------------------------------------------------------------------------------------------------------------------------------------------------------------------------------------------------------------------------------|
| ST14   | 6768 | 23248318 | Emergent active matriptase is a functional biomarker of the transformed epithelium and that its proteolytic activity can be exploited to noninvasively evaluate tumorigenesis in vivo.                                                                    |
| STAT1  | 6772 | 22178447 | Stat1 and CD74 overexpression is co-dependent and linked to increased invasion and lymph node metastasis in triple-negative breast cancer.                                                                                                                |
| STAT1  | 6772 | 22320867 | expression of pSTAT-1 and its correlation with estrogen receptor, progesterone receptor, caspase-3, and pAkt and prognosis in premenopausal and postmenopausal patients with invasive breast cancer                                                       |
| STAT1  | 6772 | 23917355 | our results suggest that CUG2 enhances metastasis and drug resistance through STAT1 activation, which eventually contributes to tumor progression                                                                                                         |
| STAT6  | 6778 | 18294957 | These findings, together with the observation of constitutive Stat6 activation in many human malignancies, suggest that Stat6 activities could be a biomarker for cancer cell's invasive/metastatic capability.                                           |
| STAT6  | 6778 | 22108090 | Stat6 is involved in a process that promotes and transforms cancerous cells to a more severe pro-growth, apoptosis-resistant and metastasis-capable phenotype.                                                                                            |
| TBXAS1 | 6916 | 15870920 | Significantly higher expression of thromboxane synthase is associated with metastasis in non-small cell lung cancer                                                                                                                                       |
| TBXAS1 | 6916 | 16357168 | Overexpression of thromboxane synthase is associated with invasive bladder cancer                                                                                                                                                                         |
| TGFB2  | 7042 | 15389580 | PSA-mediated activation of latent TGFbeta2 may be an important mechanism for autocrine TGFbeta regulation in the prostate and may potentially contribute to the formation of osteoblastic lesions in bone metastatic prostate cancer.                     |
| TGFBR2 | 7048 | 12970754 | We observed subsequent loss of type II TGFbeta receptor (TBR2) expression in metastatic renal cell carcinomas [RCC]. We propose that loss of TBR3 is necessary for RCC carcinogenesis, and loss of TBR2 leads to acquisition of a metastatic phenotype.   |
| TGFBR2 | 7048 | 15976377 | Repression of type II TGF-beta receptor may act as significant determinant of lung adenocarcinoma invasiveness, an early step in tumor progression toward metastasis.                                                                                     |
| TGFBR2 | 7048 | 19538865 | Low expression of Smad4 and TbetaRII may promote metastasis of oral squamous cell carcinoma.                                                                                                                                                              |
| TGFBR2 | 7048 | 19624886 | TGF-betaRII expression was related with depth of invasion, lymph node metastasis, tumor differentiation, and Lauren classification of gastric cancer.                                                                                                     |
| TGFBR2 | 7048 | 20878063 | The simultaneous expression of Endoglin (CD105), transforming growth factor (TGF)-beta1 and TGF-beta receptor (R) II were quantified in normal human colon, pre-malignant dysplastic tissue, and invasive colon cancer specimens                          |
| TGFBR2 | 7048 | 21454688 | Restoration of transforming growth factor-beta receptor II expression in colon cancer cells with microsatellite instability increases metastatic potential in vivo                                                                                        |
| TGFBR2 | 7048 | 22278155 | Data suggest that TGF-beta, TGF-betaR1, TGF-betaR2, Smad4, pSmad2/3, and E-cadherin are closely related to tumor-node-metastasis (TNM) stage of colorectal cancer (CRC).                                                                                  |
| TGFBR2 | 7048 | 22672900 | Data indicate that abrogation of TGFbeta signaling through introduction of a dominant negative TGFbeta receptor II (TGFbetaRII) in non-metastatic FETalpha colon cancer cells permits metastasis to distal organs, but does not reduce invasive behavior. |
| TGFBR2 | 7048 | 22684895 | miR-590-5p promotes proliferation and invasion in human hepatocellular carcinoma cells by directly targeting TGF-beta RII. [mir-590-5p]                                                                                                                   |
| TGFBR2 | 7048 | 22912877 | Data indicate that MiR-106a inhibits the expression of transforming growth factor-beta receptor 2 (TGFBR2), leading to increased colorectal cancer (CRC) cell migration and invasion.                                                                     |
| TGFBR2 | 7048 | 23220853 | an association between TGF-betaRII-negative tumor and higher risk of metastasis to lungs and bones was verified.                                                                                                                                          |

|        |      |          |                                                                                                                                                                                                                                                          |
|--------|------|----------|----------------------------------------------------------------------------------------------------------------------------------------------------------------------------------------------------------------------------------------------------------|
| TGFBR3 | 7049 | 1799987  | type III transforming growth factor beta receptor has a role in preventing motility and invasiveness associated with epithelial to mesenchymal transition during pancreatic cancer progression                                                           |
| TGFBR3 | 7049 | 19416857 | an unexpected TGF-beta signaling independent role for TbetaRIII in activating Cdc42, altering the actin cytoskeleton and reducing directional persistence to inhibit random migration of both cancer and normal epithelial cells                         |
| TGFBR3 | 7049 | 20153821 | A review on the role of TbetaRIII as a suppressor of cancer progression and/or as a metastasis suppressor.                                                                                                                                               |
| TGFBR3 | 7049 | 23835618 | Low TGFBR3 expression is associated with bladder urothelial carcinoma and enhanced in the invasive bladder cancer.                                                                                                                                       |
| THBS1  | 7057 | 11801541 | Increased expression is associated with breast tumor metastasis                                                                                                                                                                                          |
| THBS1  | 7057 | 11882904 | Stromally derived TSP-1 upregulates the production of MMP-9 and regulates matrix remodeling of tumor invasion in pancreatic adenocarcinoma                                                                                                               |
| THBS1  | 7057 | 12927044 | TSP1 expression is significantly higher in malignant epithelial sources over normal and benign epithelial sources, but no difference in expression levels is evident between primary tumors with or without metastases.                                  |
| THBS1  | 7057 | 17106256 | cyclin D1 may have a central role in mediating invasion and metastasis of cancer cells by controlling Rho/ROCK signaling and matrix deposition of TSP-1 [review]                                                                                         |
| THBS1  | 7057 | 18222489 | The data document the importance of TSP-1 in promoting MMP-2-mediated cancer cell invasion.                                                                                                                                                              |
| THBS1  | 7057 | 18321763 | TSP-1 promotes human follicular thyroid carcinoma cell invasion mainly through up-regulation of the urokinase-dependent activity.                                                                                                                        |
| THBS1  | 7057 | 18661355 | recent results dealing with regulation of TSP-1 expression by epidermal growth factor & hepatocyte growth factor; results show TSP-1 can have opposite effects on cell invasion depending upon type of differentiated thyroid carcinoma studied [review] |
| THBS1  | 7057 | 19584238 | Upregulation of thrombospondin-1 and angiogenesis is associated with pancreatic cancer metastasis.                                                                                                                                                       |
| THBS1  | 7057 | 19762163 | Increased VEGF and MMP-9 expression as well as decreased TSP-1 expression may play considerable roles in the invasion and differentiation of urothelial carcinoma.                                                                                       |
| THBS1  | 7057 | 19959938 | HGF is a potential downregulator of TSP-1, through MAPK signaling pathways, leading to the induction of MMP-9 expression and subsequent invasion of SKOV-3ovarian cancer cells.                                                                          |
| THBS1  | 7057 | 20498063 | Knockdown of B-Raf(V600E) resulted in TSP-1 down-regulation and a reduction of adhesion and migration/invasion of human thyroid cancer cells.                                                                                                            |
| THBS1  | 7057 | 22037878 | Data suggest that intratumor disruption of the hypoxic cycle through thrombospondin 1 (TSP1) silencing will limit tumor invasion.                                                                                                                        |
| THBS1  | 7057 | 22231149 | Overexpression of THBS-1 in stromal myofibroblasts is associated with tumor growth and nodal metastasis in gastric carcinoma. THBS-1 may activate latent transforming growth factor-beta1 to stimulate fibroblasts to differentiate into myofibroblasts. |
| THBS1  | 7057 | 23380452 | these data demonstrate that PRMT6 overexpression is associated with regulation of motility and invasion through up-regulation of TSP-1 and down-regulation of MMPs in human cancer cells.                                                                |
| THY1   | 7070 | 16007174 | THY1 is a good candidate tumour suppressor gene in nasopharyngeal carcinoma, which is significantly associated with lymph node metastases.                                                                                                               |
| THY1   | 7070 | 19615261 | Down-regulated/loss expression of THY1 protein in epithelial ovarian cancer is significantly correlated with cancer cell proliferation and metastasis in the epithelial ovarian cancer.                                                                  |
| THY1   | 7070 | 23382045 | High CD90 tumor-initiating cell population is associated with an aggressive signature and metastatic capacity in esophageal cancer.                                                                                                                      |



|      |      |          |                                                                                                                                                                                                                                       |
|------|------|----------|---------------------------------------------------------------------------------------------------------------------------------------------------------------------------------------------------------------------------------------|
| TNXB | 7148 | 18091320 | This study showed different patterns of expression of tenascin and fibronectin along the process of tumorigenesis and tumor progression in pleomorphic adenoma, a fact that might play a role in invasion properties of these tumors. |
| TP53 | 7157 | 11763417 | A lower invasiveness and shorter survival was seen in tumors with a TP53 mutation                                                                                                                                                     |
| TP53 | 7157 | 11793443 | TP53-mutated tumors need fewer additional genetic alterations to develop metastases in primary head and neck tumors compared with TP53 wild-type primary tumors.                                                                      |
| TP53 | 7157 | 11920528 | expression has an independent effect on prediction of survival, progression, and development of metastasis in transitional cell bladder carcinoma                                                                                     |
| TP53 | 7157 | 12190289 | p53 was detected more frequently in CIN I compared with CIN II/III and invasive carcinoma                                                                                                                                             |
| TP53 | 7157 | 12452062 | abnormal expressions of COX-2, p53, PCNA, and nm23 associate with malignant potential, lymph node metastasis and clinical stage, and they might therefore play a role in development of gastric cancer                                |
| TP53 | 7157 | 12607595 | VEGF expression plays a role in promoting angiogenesis in invasive ductal carcinoma of the breast, and p53 is likely to be involved in regulating VEGF expression.                                                                    |
| TP53 | 7157 | 12905527 | role of p53 gene in the biophysics and biology in murine erythroleukemia cell line with the goal of understanding the influence of this tumor suppressor gene on the deformability and metastasis of tumor cells                      |
| TP53 | 7157 | 12926152 | p53 is involved in the progression of anal cancer and its expression increases from early in the development of pre-invasive anal lesions.                                                                                            |
| TP53 | 7157 | 14566828 | value of this tumor marker regarding relapse, metastasis and death in resectable non-small cell lung cancer                                                                                                                           |
| TP53 | 7157 | 14648233 | Bulgarian patients with invasive breast cancer screened for p53 gene mutations registered a 33.33% frequency of mutations.                                                                                                            |
| TP53 | 7157 | 14749371 | v-Fos-stimulated invasion is independent of the pRb/p16(INK4a) and p53 tumor suppressor pathways and telomerase                                                                                                                       |
| TP53 | 7157 | 15367885 | p53 mutations were found in 70% of pancreatic adenocarcinoma cell lines and 33% of primary tumors. p53 missense mutations correlated with more frequent metastases to all sites.                                                      |
| TP53 | 7157 | 16169726 | HER-2/neu and p53 are likely to be involved in the regulation of COX-2 expression in invasive ductal carcinomas of the breast.                                                                                                        |
| TP53 | 7157 | 16248462 | Overexpression of p53 is related with the stage and cervical lymph node metastasis of nasopharyngeal carcinoma.                                                                                                                       |
| TP53 | 7157 | 16839413 | The Bcl-2 protein expression has a close correlation with p27 and p53 protein expressions and the proliferation activity determined by MIB-1 counts in invasive ductal carcinoma of the breast.                                       |
| TP53 | 7157 | 16951228 | The p53-positive tumors had more lymph node metastasis, and p53-positive had the worst prognosis with gastric cancer.                                                                                                                 |
| TP53 | 7157 | 17130833 | suggest a mechanism for elevated CXCR4 expression and metastasis of breast cancers with p53 mutations or isoform expression                                                                                                           |
| TP53 | 7157 | 17259658 | TP53 mutational status seems to be an important prognostic factor in patients undergoing surgical resection of colorectal cancer with hepatic metastases.                                                                             |
| TP53 | 7157 | 17374967 | xeroderma pigmentosum group C protein polymorphism might affect p53 alteration and the molecular pathway defined by the p53 alteration in the development of muscle-invasive bladder cancer                                           |
| TP53 | 7157 | 17417775 | we have identified PROX1 as a novel target gene that is hypermethylated and transcriptionally silenced in primary and metastatic breast cancer.                                                                                       |
| TP53 | 7157 | 17447881 | Mutations of p53 were associated with lymph node metastases and III/IV stage of tumors that are signs of unfavorable prognosis in colorectal cancer.                                                                                  |
| TP53 | 7157 | 17449902 | Common variation in the TP53 gene could modify the risk of invasive breast cancer.                                                                                                                                                    |

|      |      |          |                                                                                                                                                                                                                                                         |
|------|------|----------|---------------------------------------------------------------------------------------------------------------------------------------------------------------------------------------------------------------------------------------------------------|
| TP53 | 7157 | 17478762 | Expression of c-erbB-2 and p53 has no prognostic value in patients with early-stage breast cancer in which axillary lymph node metastasis is absent.                                                                                                    |
| TP53 | 7157 | 17504383 | Positive staining of p53 was significantly correlated with increased stage, lymph node metastases, and a nonendometrioid histology in endometrial carcinoma.                                                                                            |
| TP53 | 7157 | 17557566 | the presence of p53 mutations in the surgical margins of squamous cell carcinoma of the head and neck may not increase the risk of local-regional recurrence, but probably increases the risk of developing distant metastases or second primary tumors |
| TP53 | 7157 | 17641416 | N33, STK11 (19p13) and TP53 might play a role in the development of metastasis in larynx and pharynx squamous cell carcinomas.                                                                                                                          |
| TP53 | 7157 | 17709727 | Patients with primary colorectal cancer with low TSP-1 expression, with or without detection of mp53 gene product, are more likely to harbor lymph node metastasis than patients with higher expression.                                                |
| TP53 | 7157 | 17974918 | The functional interplay between EGFR overexpression, hTERT activation, and p53 mutation in esophageal epithelial cells with activation of stromal fibroblasts induces tumor development, invasion, and differentiation.                                |
| TP53 | 7157 | 18094375 | Stroma-specific loss of heterozygosity or allelic imbalance is associated with somatic TP53 mutations and regional lymph-node metastases in sporadic breast cancer but not in hereditary breast cancer.                                                 |
| TP53 | 7157 | 18230179 | Findings suggest TP53 PIN3 Ins16bp polymorphism as a real risk modifier in breast cancer disease, either in sporadic and familial breast cancer. Furthermore, both TP53 polymorphisms are associated with higher incidence of lymph node metastases.    |
| TP53 | 7157 | 18264135 | p53 has a role in preventing centrosome amplification, ERalpha phenotypic heterogeneity and metastasis in breast cancer                                                                                                                                 |
| TP53 | 7157 | 18330257 | The expression of p53 was significantly correlated with lymph node metastasis in laryngeal carcinoma.                                                                                                                                                   |
| TP53 | 7157 | 18383208 | Increased TP53 expression was associated with invasive adenocarcinoma of the prostate                                                                                                                                                                   |
| TP53 | 7157 | 18386458 | in endometrial carcinoma p53 overexpression was directly associated with unfavorable clinicopathologic factors: advanced stage, histologic subtype, advanced patient age and nodal metastasis                                                           |
| TP53 | 7157 | 18393238 | The R allele of the TP53 R72P polymorphism may contribute to the etiology of liver metastases, particularly among those with positive P53 expression tumors. Both TP53 C-8343G and C-1863T may be not associated with colorectal liver metastases risk. |
| TP53 | 7157 | 18452596 | might be markers of depth of invasion or lymph node involvement in patients with gastric cancers                                                                                                                                                        |
| TP53 | 7157 | 18561741 | Expression of p53, in cervical intraepithelial neoplasia and invasive squamous cell carcinoma of the uterine cervix                                                                                                                                     |
| TP53 | 7157 | 18670315 | TP53 mutation is associated with metastatic pulmonary adenocarcinomas.                                                                                                                                                                                  |
| TP53 | 7157 | 18988302 | Results demonstrate for the first time that the 72R allele of the p53 polymorphism has an increased risk for liver metastases in colorectal cancers positive for p53 overexpression.                                                                    |
| TP53 | 7157 | 19141643 | Data are the first demonstration that wild-type p53 protein binds to a response element within the EpCAM gene and negatively regulates EpCAM expression, and transcriptional repression of EpCAM contributes to p53 control of breast cancer invasion.  |
| TP53 | 7157 | 19155088 | p53 may play a role in influencing tumor metastasis through Lasp1 in hepatocellular carcinoma.                                                                                                                                                          |
| TP53 | 7157 | 19261747 | combined deletion of p53 and Pten in bladder epithelium leads to invasive cancer in a novel mouse model. Inactivation of p53 and PTEN promotes tumorigenesis in human bladder cells and is correlated with poor survival in human tumors.               |

|      |      |          |                                                                                                                                                                                                                                                   |
|------|------|----------|---------------------------------------------------------------------------------------------------------------------------------------------------------------------------------------------------------------------------------------------------|
| TP53 | 7157 | 19367287 | TP53 genotyping may be of clinical interest in selecting patients who may benefit from cetuximab-based chemotherapy in metastatic colorectal cancer.                                                                                              |
| TP53 | 7157 | 19403344 | Full sequencing of TP53 identifies identical mutations within in situ and invasive components in breast cancer suggesting clonal evolution.                                                                                                       |
| TP53 | 7157 | 19437562 | Data show that FAT10 and mutant p53 levels in gastric cancer tissue were significantly correlated with lymph node metastasis and tumor, nodes, metastasis staging.                                                                                |
| TP53 | 7157 | 19448627 | Results indicate that wtp53 and p53 mutants may differentially control cancer invasion and metastasis through the p53-MDM2-Slug pathway.                                                                                                          |
| TP53 | 7157 | 19513503 | Enhanced S100A4 protein expression is clinicopathologically significant to metastatic potential and p53 dysfunction in colorectal cancer.                                                                                                         |
| TP53 | 7157 | 19597352 | Data show that downregulation of EMMPRIN by p53 leads to a decrease in the activity of MMP-9 and an inhibition of tumor cell invasion.                                                                                                            |
| TP53 | 7157 | 19628749 | Among human cancers, sebaceous carcinoma of the eyelid may be one of those showing most frequent mutation of the p53 gene, which may not be caused by exposure to UV. p21(WAF1/CIP1) downregulation may be associated with lymph node metastasis. |
| TP53 | 7157 | 19657752 | TP53 increased in high-grade invasive ductal breast carcinoma compared to DCIS.                                                                                                                                                                   |
| TP53 | 7157 | 19787241 | Intronic polymorphisms in TP53 indicate lymph node metastasis in breast cancer.                                                                                                                                                                   |
| TP53 | 7157 | 19836055 | results indicated a close association between p53 protein expression in tumor-stromal fibroblasts, and both the presence of nodal metastasis and the outcome of invasive ductal carcinoma patients who received neoadjuvant therapy.              |
| TP53 | 7157 | 19909015 | Combined analysis of smoking, TP53, and FGFR3 mutations in Tunisian patients with invasive and superficial high-grade bladder tumors.                                                                                                             |
| TP53 | 7157 | 19917135 | Elevated expression of p53-R175H mutant may exert gain-of-function activity to activate the EGFR/PI3K/AKT pathway and thus may contribute to the invasive phenotype in endometrial cancer.                                                        |
| TP53 | 7157 | 20018721 | Results identify two critical acquired functions of a stably expressed mutant form of p53 that drive pancreatic ductal adenocarcinoma; first, an escape from Kras(G12D)-induced senescence/growth arrest and second, the promotion of metastasis. |
| TP53 | 7157 | 20129645 | A combination of low beta-catenin and high p53 expression in primary colorectal cancers may be a prognostic factor in predicting the progression of the disease, the occurrence of metastasis, and a more severe outcome.                         |
| TP53 | 7157 | 20299546 | aryl hydrocarbon receptor ligands might contribute to tumor progression by inhibiting p53 regulation via the increased expression of the metastasis marker AGR2                                                                                   |
| TP53 | 7157 | 20386703 | variants in TP53 were confirmed to be associated with risk of invasive serous ovarian cancer                                                                                                                                                      |
| TP53 | 7157 | 20514505 | TP53 gene mutation is associated with the differential diagnosis of primary and metastatic ovarian cancer.                                                                                                                                        |
| TP53 | 7157 | 20811949 | TP53 and EGFR mutations usually precede lymph node metastasis and that these gene statuses in matched primary non-small cell lung cancers and lymph node metastasis show predominantly a concordant pattern                                       |
| TP53 | 7157 | 20878064 | we identified distinct novel non-canonical transcriptome networks involved in breast cancer cell proliferation, epithelial to mesenchymal transition , chemoresistance and invasion that arise following abrogation of p53 function               |
| TP53 | 7157 | 21046311 | As diffuse and multiple features on imaging modalities represent invasive characteristics of the tumors, p53 abnormalities may affect the invasive and aggressive nature of malignant astrocytomas                                                |
| TP53 | 7157 | 21388952 | Loss of p53 and acquisition of angiogenic microRNA profile are insufficient to facilitate progression of bladder urothelial carcinoma in situ to invasive carcinoma.                                                                              |

|      |      |          |                                                                                                                                                                                                                                                              |
|------|------|----------|--------------------------------------------------------------------------------------------------------------------------------------------------------------------------------------------------------------------------------------------------------------|
| TP53 | 7157 | 21478913 | These findings show an important role for p53 in the progression of serous borderline ovarian tumors to an invasive carcinoma, and suggest that downregulation of E-cadherin by DNMT1-mediated promoter methylation contributes to this process.             |
| TP53 | 7157 | 21501231 | A high p53-LI (p53+) was observed in 17/59 cases (28.8%). many p53+/PCNA+ cases could be confirmed as highly invasive cancer. the p53+/PCNA+ cases showed high risk of tumor recurrence; patients with p53+/PCNA+ had worse prognosis.                       |
| TP53 | 7157 | 21519792 | lupulone-triggered enhanced expression of p38 plays a major role in the activation of p53 and of the TRAIL-death receptor apoptotic pathway in SW620 human colon cancer-derived metastatic cells                                                             |
| TP53 | 7157 | 21831840 | These results also show that the extent of advanced cancer traits, such as invasion, may be determined by alterations in individual components of p53/MET regulatory network.                                                                                |
| TP53 | 7157 | 21868761 | KLF5 transactivates NOTCH1 in the context of p53 mutation or loss. KLF5 loss limited NOTCH1 activity and was sufficient on its own to transform primary human keratinocytes harboring mutant p53, leading to the formation of invasive tumors.               |
| TP53 | 7157 | 21986947 | Mutant p53 drives multinucleation and breast cancer invasion through a process that is suppressed by ANKRD11.                                                                                                                                                |
| TP53 | 7157 | 22165746 | direct correlation between p53 expression and gastric cancer and it indicates the ability of carcinoma cells to invade blood vessels                                                                                                                         |
| TP53 | 7157 | 22187033 | Mutation in TP53 is the most common genetic alteration reported during metastasis to the brain in breast cancer                                                                                                                                              |
| TP53 | 7157 | 22354696 | TP53 mutations occur more frequently in pleomorphic variants of invasive lobular carcinoma (ILC) than ILC.                                                                                                                                                   |
| TP53 | 7157 | 22510504 | The expression of TIMP-3 in the non-small cell lung cancer and metastasis groups was upregulated.                                                                                                                                                            |
| TP53 | 7157 | 22707142 | among Asians, the p53 codon 72 Arg/Arg genotype is associated with a modestly decreased risk of gastric cancer, and that this difference in genotype distribution may be associated with cancer stage, location, differentiation and metastasis.             |
| TP53 | 7157 | 22714709 | PUMA, c-Myb and p53 protein expression closely relates to the carcinogenesis, fast-progression, easy-metastasis, high-invasion, and poor-prognosis in gallbladder adenocarcinoma.                                                                            |
| TP53 | 7157 | 22847613 | These data provide a novel understanding of the roles of p53 gain-of-function mutations in accelerating tumor progression and metastasis through modulation of the miR-130b-ZEB1 axis.                                                                       |
| TP53 | 7157 | 23106581 | Overexpression of TERT was comparable to that for p53 in invasive keratinizing squamous cell carcinoma; significant differences were calculated for differentiated vulvar intraepithelial neoplasia and high-grade classic vulvar intraepithelial neoplasia. |
| TP53 | 7157 | 23232572 | High-grade bladder in situ/muscle-invasive carcinoma on is characterized by alteration of p53 and pRB.                                                                                                                                                       |
| TP53 | 7157 | 23404342 | Loss of wild type-p53 may promote the bone metastasis of prostate cancer at least partially through repressing miR-145.                                                                                                                                      |
| TP53 | 7157 | 23670029 | Patients with mtp53 tumors were older at diagnosis, had more incidence of liver metastasis, and more frequent PTEN loss.                                                                                                                                     |
| TP53 | 7157 | 23687381 | this data suggest that plakoglobin regulates gene expression in conjunction with p53 and that plakoglobin may regulate p53 transcriptional activity, which may account, in part, for the tumor/metastasis suppressor activity of plakoglobin.                |
| TP53 | 7157 | 23873310 | our data indicate p53 showing predicting role in diagnosis to death (OS1) for visceral metastasis breast cancer (VMBC) patients. but not for metastases to death (OS2).                                                                                      |

|       |      |          |                                                                                                                                                                                                                                                                                                                                                |
|-------|------|----------|------------------------------------------------------------------------------------------------------------------------------------------------------------------------------------------------------------------------------------------------------------------------------------------------------------------------------------------------|
| TP53  | 7157 | 23881403 | The study demonstrates coordinated regulation of Numb, MDM2 and p53 on cell invasion and migration in pancreatic cancer.                                                                                                                                                                                                                       |
| TP53  | 7157 | 23915071 | Our data indicate that parallel expression of MMP-2 epithelial/stromal cells and p53 may enhance cells invasion and metastasis in ovarian carcinoma.                                                                                                                                                                                           |
| TP53  | 7157 | 23959174 | Furthermore, our study reveals that high expression of RPN2 and concomitant accumulation of mtp53 were associated with cancer tissues in a small cohort of metastatic breast cancer patients.                                                                                                                                                  |
| TP53  | 7157 | 23982184 | Loss of P53 promotes the invasion and metastasis ability of prostate cancer cells and the mechanism is correlated with FAK-Src signaling pathway.                                                                                                                                                                                              |
| TP53  | 7157 | 24047084 | Studies indicate that tumor suppressor gene p53 and other genes associated with DNA repair, cell proliferation, migration and angiogenesis are critical for the development of pterygium.                                                                                                                                                      |
| TP53  | 7157 | 24146864 | p53 and p16 expressions are important for the development of triple-negative breast cancers in ductal carcinoma in situ and invasive ductal carcinoma.                                                                                                                                                                                         |
| TP53  | 7157 | 24285725 | there is a p53-induced double-negative feedback loop involving miR-15a/16-1 and AP4 that stabilizes epithelial and mesenchymal states, respectively, which may determine metastatic prowess in colorectal cancer                                                                                                                               |
| TP53  | 7157 | 24487586 | Myo10 upregulation in mutant p53-driven cancers is necessary for invasion and that plasma-membrane protrusions.                                                                                                                                                                                                                                |
| TP53  | 7157 | 24725405 | Study combined several orthogonal approaches and models to explore the basis whereby mutant p53 promotes invasion and metastasis in pancreatic ductal adenocarcinoma (PDAC) and identified the PDGFRb as necessary and sufficient to mediate the effects of mutant p53 on invasion and metastasis in both a murine model and human PDAC cells. |
| TP53  | 7157 | 24924261 | TP53 mutations may possibly be associated with a more indolent course of colorectal cancer after the diagnosis of metastatic disease.                                                                                                                                                                                                          |
| TP53  | 7157 | 25119169 | Ductal adenocarcinoma of the pancreas metastasizing to the liver retained the primary tumour's SMAD4/TP53 protein status.                                                                                                                                                                                                                      |
| TPM1  | 7168 | 15897890 | Epigenetic suppression of TPM1 may alter TGF-beta tumor suppressor function and contribute to metastatic properties of tumor cells.                                                                                                                                                                                                            |
| TPM1  | 7168 | 22740512 | Expression of low molecular weight isoforms from TPM1 and TPM3 genes is regulated very differently, which has a critical role in processes such as cancer metastasis.                                                                                                                                                                          |
| TPO   | 7173 | 12459031 | Positivity in TPO-RT-PCR correlates significantly with metastatic disease in cancer patients and with the presence of thyroid disease in general.                                                                                                                                                                                              |
| TPO   | 7173 | 22435912 | analysis of how minimally invasive follicular thyroid carcinoma developed in dys hormonogenetic multinodular goiter due to thyroid peroxidase gene mutation [case report]                                                                                                                                                                      |
| TRPM2 | 7226 | 23910495 | TRPM7 plays a critical role in breast cancer cell migration through its kinase domain.                                                                                                                                                                                                                                                         |
| TYK2  | 7297 | 17920038 | These results suggest that Tyk2 signaling in prostate cancer cells facilitate invasion of these cells, and interference with this signaling may be a potential therapeutic pathway.                                                                                                                                                            |
| TYK2  | 7297 | 22116632 | data highlight the role of TYK2 downregulation in breast cancer cell de-differentiation and initiation of regional metastasis                                                                                                                                                                                                                  |
| UBE2I | 7329 | 20023705 | Molecular link exists between Ubc9 and the metastasis genes such as CDC42 and CXCR4 in breast cancer invasiveness and metastasis                                                                                                                                                                                                               |
| UBE2I | 7329 | 23381475 | we demonstrated that upregulation of Ubc9 expression promotes migration and invasion. Ubc9 likely plays an important role in cancer progression by promoting invasion and metastasis in lung cancer.                                                                                                                                           |
| XRCC1 | 7515 | 17116943 | XRCC1-01, XRCC3-01, and CCND1-01 may be predictive of survival outcome in patients with metastatic breast cancer treated with DNA-damaging chemotherapy                                                                                                                                                                                        |

|       |      |          |                                                                                                                                                                                                                                                                |
|-------|------|----------|----------------------------------------------------------------------------------------------------------------------------------------------------------------------------------------------------------------------------------------------------------------|
| XRCC1 | 7515 | 19127428 | These results suggest that XRCC1Arg399Gln is a strong predictor of survival outcome for patients with metastatic breast cancer following high dose chemotherapy and autologous stem cell transplantation                                                       |
| XRCC1 | 7515 | 20863780 | XRCC1 194Trp allele significantly increased the risk of gastric cancer and also associated with risk of gastric cardia carcinoma and promoted distant metastasis of gastric cancer.                                                                            |
| XRCC1 | 7515 | 23435956 | individuals whose expression of XRCC1, ERCC4, ERCC2, and ERCC1 are reduced may be at a higher risk of developing squamous intraepithelial lesion which eventually leads to invasive cervical carcinoma.                                                        |
| CXCR4 | 7852 | 11912162 | Use of the stromal cell-derived factor-1/CXCR4 pathway in prostate cancer metastasis to bone.                                                                                                                                                                  |
| CXCR4 | 7852 | 12499259 | Vascular endothelial growth factor promotes breast carcinoma invasion in an autocrine manner by regulating the chemokine receptor CXCR4.                                                                                                                       |
| CXCR4 | 7852 | 12519884 | findings suggest that a subset of anaplastic thyroid carcinoma cells expresses functional CXCR4, which may be important in tumor cell migration and local tumor invasion                                                                                       |
| CXCR4 | 7852 | 12690099 | CXCR4 is induced by NF-kappa B and has a role in breast cancer cell migration and metastasis                                                                                                                                                                   |
| CXCR4 | 7852 | 12927045 | Tumors with high CXCR4 expression showed more extensive lymphatic spread than those with low CXCR4 expression, because the range and number of metastatic nodes were significantly larger in cases of high CXCR4 expression than in those with low expression. |
| CXCR4 | 7852 | 14567988 | stromal-cell-derived factor-1alpha /CXCR4 signaling may be involved in the establishment of lymph node metastasis in oral squamous cell carcinoma via activation of both Extracellular Signal-Regulated Kinases and Akt induced by src-Family Kinases          |
| CXCR4 | 7852 | 15026622 | CXCR4 is expressed in human ductal carcinoma in situ as well as in atypical ductal hyperplasia; expression at this early step of tumor development suggests CXCR4 role in providing selective advantage to such cells on their way to metastasizing carcinomas |
| CXCR4 | 7852 | 15201990 | CXCR4 signaling in oral SCC cells might be involved in the diverse action of oral squamous cell carcinoma, including invasion or micrometastasis at the primary site and lymph node metastasis.                                                                |
| CXCR4 | 7852 | 15235108 | CXCR4 and its ligand stromal cell-derived factor 1alpha (SDF-1alpha) induced transendothelial breast cancer cell migration through activation of the PI-3K/AKT pathway and Ca(2+)-mediated signaling.                                                          |
| CXCR4 | 7852 | 15363550 | CXCR4 may be a novel regulator of head and neck squamous cell carcinoma metastatic processes                                                                                                                                                                   |
| CXCR4 | 7852 | 15467730 | Mechanisms of CXCR4/CXCL12-mediated prostate cancer cell migration and invasion.                                                                                                                                                                               |
| CXCR4 | 7852 | 15486895 | CXCR4 expression in neuroblastoma primary tumors is significantly correlated with the pattern of metastatic spread                                                                                                                                             |
| CXCR4 | 7852 | 15492752 | CXCR4 signaling mediates the establishment of lymph node metastasis in oral squamous cell carcinoma.                                                                                                                                                           |
| CXCR4 | 7852 | 15540205 | CXCR4 is a potential target for the attenuation of bladder cancer metastases.                                                                                                                                                                                  |
| CXCR4 | 7852 | 15542430 | These results provide a plausible mechanism for HER2-mediated breast tumor metastasis and establish a functional link between HER2 and CXCR4 signaling pathways.                                                                                               |
| CXCR4 | 7852 | 15548713 | CXCR4 receptor is frequently expressed in metastatic pancreatic tumor cells. CXCR4 not only stimulates cell motility and invasion but also promotes survival and proliferation                                                                                 |

|       |      |          |                                                                                                                                                                                                                                                                |
|-------|------|----------|----------------------------------------------------------------------------------------------------------------------------------------------------------------------------------------------------------------------------------------------------------------|
| CXCR4 | 7852 | 15805285 | CHK down-regulates CXCR4 through the YY1 transcription factor, leading to decreased CXCR4-mediated breast cancer cell motility and migration.                                                                                                                  |
| CXCR4 | 7852 | 15843590 | In an organotypic melanoma culture, cytotoxic T cells (CTL) mediated by chemokine receptor CXCR4 expressed by the CTL migrate from the top layer through a collagen/fibroblast separating layer toward the tumor cells, resulting in tumor cell apoptosis.     |
| CXCR4 | 7852 | 15844659 | prostate cancers may be influenced by the CXCL12:CXCR4 pathway during metastasis                                                                                                                                                                               |
| CXCR4 | 7852 | 16114056 | CXCL12/CXCR4 axis is expressed in prostate cancer bone metastasis and exogenous CXCL12 induced MMP-9 expression.                                                                                                                                               |
| CXCR4 | 7852 | 16230077 | CXCR4 expression mediates organ-specific metastasis of pancreatic cancer cells.                                                                                                                                                                                |
| CXCR4 | 7852 | 16322285 | Overexpression of CXCR4 is associated with the metastatic potential of human non-small cell lung cancer                                                                                                                                                        |
| CXCR4 | 7852 | 16327980 | findings suggest that CXCR4 might be involved in the lymph-node metastasis of oral squamous cell carcinoma                                                                                                                                                     |
| CXCR4 | 7852 | 16494043 | CXCR4 and CCR7 are highly expressed in laryngeal carcinoma. Expression was associated with tumor grade, clinical stage and neck lymph node metastasis.                                                                                                         |
| CXCR4 | 7852 | 16618732 | CXCR4 function is subject to complex and potentially tightly controlled regulation in breast cancer cells via differential G protein-receptor complex formation, and this regulation may play a role in the transition from nonmetastatic to malignant tumors. |
| CXCR4 | 7852 | 16823836 | Adenosine increases cell-surface CXCR4 protein, which enables the carcinoma cells to migrate toward CXCL12.                                                                                                                                                    |
| CXCR4 | 7852 | 16969502 | expression of AR down-regulates the migratory responses of human prostate cancer cells via CXCR4 and CCR1                                                                                                                                                      |
| CXCR4 | 7852 | 17032700 | Significantly higher CXCR4 expression is associated with lymph node metastasis in human cervical cancer                                                                                                                                                        |
| CXCR4 | 7852 | 17075975 | CXCR4 expression in colorectal liver metastases suggests it is a predictive factor. CCL20 and receptor CCR6 expression in hepatocellular carcinomas indicates a role of a CCL20/CCR6 ligand-receptor pair in liver carcinogenesis and progression.             |
| CXCR4 | 7852 | 17130833 | suggest a mechanism for elevated CXCR4 expression and metastasis of breast cancers with p53 mutations or isoform expression                                                                                                                                    |
| CXCR4 | 7852 | 17355795 | CXCR4 overexpression indicates a higher lymph node metastasis potential of cervical adenocarcinoma.                                                                                                                                                            |
| CXCR4 | 7852 | 17461449 | These results indicated that the activation of CXCR4 and its signaling pathways (MEK1/2 and Akt) are essential for CXCL12-induced cholangiocarcinoma cell invasion.                                                                                            |
| CXCR4 | 7852 | 17504381 | Primary cervical adenocarcinoma cells expressing CXCR4 are significantly more likely to metastasize to pelvic lymph nodes.                                                                                                                                     |
| CXCR4 | 7852 | 17510563 | The CXCL12 ligand with its exclusive receptor CXCR4 has a pivotal role in the directional migration of cancer cells during the metastatic process. [REVIEW]                                                                                                    |
| CXCR4 | 7852 | 17634424 | These results suggested that, in cases of oral squamous cell carcinoma, the paracrine SDF-1/CXCR4 system potentiates lymph node metastasis, but distant metastasis might require the autocrine SDF-1/CXCR4 system.                                             |
| CXCR4 | 7852 | 17641542 | CXCR4 contributed to lymphatic involvement and nodal metastasis in colorectal cancer.                                                                                                                                                                          |
| CXCR4 | 7852 | 17687643 | prolonged Akt activation is an important signaling pathway for breast cancer cells expressing CXCR4 and is necessary for CXCL12-dependent cell migration                                                                                                       |
| CXCR4 | 7852 | 17763975 | High expression of nuclear CXCR4 was significantly correlated with lymph node metastasis in breast cancer.                                                                                                                                                     |
| CXCR4 | 7852 | 17889832 | Data support the conclusion that miRNA against CXCR4 can serve as an alternative means of therapy to lower CXCR4 expression and to block the invasion and metastasis of breast cancer cells.                                                                   |
| CXCR4 | 7852 | 17893878 | Overexpression of SDF-1alpha/CXCR4 is associated with enhanced peritoneal metastasis of epithelial ovarian carcinoma                                                                                                                                           |

|       |      |          |                                                                                                                                                                                                                                       |
|-------|------|----------|---------------------------------------------------------------------------------------------------------------------------------------------------------------------------------------------------------------------------------------|
| CXCR4 | 7852 | 17916907 | bone marrow-derived-SDF-1alpha enhances the invasiveness of lung cancer cells by increasing MMP-9 expression through the CXCR4/ERK/NF-kappaB signal transduction pathway                                                              |
| CXCR4 | 7852 | 18201276 | the pattern of chemokine receptor CXCR4 expression in patients with metastatic prostate cancer.                                                                                                                                       |
| CXCR4 | 7852 | 18337451 | Lipid raft-disrupting agents inhibited raft-associated CXCL12/CXCR4 transactivation of the HER2 and cellular invasion in prostate cancer cells.                                                                                       |
| CXCR4 | 7852 | 18373506 | In node-negative breast cancers CXCR4 membrane expression is prognostic and probably plays a key role in vascular invasion by cancer cells and a role in lymphatic invasion.                                                          |
| CXCR4 | 7852 | 18416455 | Inhibition of CXCR4 activity with AMD3100 decreases invasion of human colorectal cancer cells in vitro.                                                                                                                               |
| CXCR4 | 7852 | 18443596 | Expression of nuclear CXCR4 predicts lymph node (LN) metastasis in colorectal cancer (CRC).                                                                                                                                           |
| CXCR4 | 7852 | 18487224 | CXCL12 enhances Laryngeal and hypopharyngeal squamous cell carcinoma cell invasion through paracrine-activated CXCR4, triggering MMP-13 upregulation.                                                                                 |
| CXCR4 | 7852 | 18502034 | Breast cancer metastasis suppressor 1 inhibits SDF-1alpha-induced migration of non-small cell lung cancer by decreasing CXCR4 expression.                                                                                             |
| CXCR4 | 7852 | 18599607 | Neuronal and endothelial cells exposed to VEGF up-regulated the expression of SDF-1alpha. CXCR4-positive tumor cells migrated toward a SDF-1alpha gradient in vitro, whereas inhibition of CXCR4 expression decreased their migration |
| CXCR4 | 7852 | 18624931 | downregulation induces anti-proliferative and anti-invasive effects in oral squamous cell carcinoma                                                                                                                                   |
| CXCR4 | 7852 | 18696160 | High CXCR4 expression is associated with extrathyroidal extension, angiolymphatic invasion, and lymph node metastasis in papillary thyroid carcinoma.                                                                                 |
| CXCR4 | 7852 | 18701133 | The association between aberrant expression of CXCR4 in the nucleus of non-small cell lung cancer and metastasis to lymph nodes points toward a potential tumor metastasis promoting function of nuclear CXCR4.                       |
| CXCR4 | 7852 | 18803056 | CXCR4 is associated with the progression of colorectal carcinoma. High CXCR4 expression is associated with metastasis.                                                                                                                |
| CXCR4 | 7852 | 18836306 | CXCR4/SDF-1 interaction blockade in prostate cancer cells by hTERT promoter induces CXCR4 knockdown and prevents metastasis                                                                                                           |
| CXCR4 | 7852 | 18851783 | CXCR4/SDF-1 participates in tumor invasiveness and metastasis in cervical cancer through regulating the adhesion ability by activating the MAPK signaling transduction pathway and promoting secretion of MMP-2.                      |
| CXCR4 | 7852 | 18949410 | In gastric cancer, CXCL12/ CXCR4 axis seems to be more strongly associated with lymphatic or hematogenous metastasis than the establishment of peritoneal deposits.                                                                   |
| CXCR4 | 7852 | 18954561 | CXCR4 and CXCL12 may play an important role in the metastasis of HCC by promoting the migration of tumor cells.                                                                                                                       |
| CXCR4 | 7852 | 19020745 | Results suggest that CXCR4 expression, histological patterns, and metastatic potential are closely related in adenoid cystic carcinoma.                                                                                               |
| CXCR4 | 7852 | 19148483 | Strong expression of CXCR4 by gastric cancer cells is associated with lymphatic metastasis in patients with gastric cancer, and CXCR4 may play an important role during gastric cancer progression.                                   |
| CXCR4 | 7852 | 19199057 | CXCR4-CXCL12 axis can play a role in the progression of endometrial carcinoma and that specific therapies with antagonists of chemokines receptors could be of help in the treatment of metastatic patients.                          |
| CXCR4 | 7852 | 19302975 | CXCR4/SDF-1 pathway was critical for TLR9 agonist to enhance the metastasis of human lung cancer cells.                                                                                                                               |
| CXCR4 | 7852 | 19373784 | At least one mutated allele of CXCR4 gene is associated with the development of stage III or IV and the induction of lymph-node metastasis of oral cancer disease in                                                                  |



|       |      |          |                                                                                                                                                                                                                                                          |
|-------|------|----------|----------------------------------------------------------------------------------------------------------------------------------------------------------------------------------------------------------------------------------------------------------|
|       |      |          | Taiwanese.                                                                                                                                                                                                                                               |
| CXCR4 | 7852 | 19438749 | This study suggests that up-regulation of cytoplasmic expression of CXCR4 might be one of the molecular mechanisms facilitating lymph node metastasis of invasive micropapillary carcinoma                                                               |
| CXCR4 | 7852 | 19513547 | CCR7 and CXCR4 expression predicts lymph node status including micrometastasis in gastric cancer.                                                                                                                                                        |
| CXCR4 | 7852 | 19513623 | The SDF-1/CXCR4 axis played a critical role in the metastasis of human ovarian cancer by increasing the adhesion capability of cancer cells and the activity of MMP-2 and MMP-9 via ERK1/2 signaling pathway.                                            |
| CXCR4 | 7852 | 19563077 | Arrest of CXCR4 can inhibit liver metastasis of colon cancer through blocking cell proliferation and migration induced by SDF-1.                                                                                                                         |
| CXCR4 | 7852 | 19568410 | the CXCR4 ligand CXCL12 is expressed by endothelial cells and likely Kupffer cells lining the liver sinusoids of liver metastatic human HEP-G2 hepatoma and HT-29LMM colon cancer                                                                        |
| CXCR4 | 7852 | 19570110 | significant association between expression of CXCR4 and lymph node metastasis, tumor size, UICC stage, tumor histology grade. SDF-1 stimulated proliferation of oral SCC cell and CXCR4 neutralization by monoclonal antibodies decreased proliferation. |
| CXCR4 | 7852 | 19580679 | Neuropilin-2 in breast cancer has a role in lymph node metastasis, poor prognosis, and regulation of CXCR4 expression                                                                                                                                    |
| CXCR4 | 7852 | 19588204 | High CXCR4 is associated with liver metastasis of colorectal cancer.                                                                                                                                                                                     |
| CXCR4 | 7852 | 19615218 | The expression of CXCR4 was significantly associated with lymphatic metastasis of pancreatic adenocarcinoma.                                                                                                                                             |
| CXCR4 | 7852 | 19615279 | CXCR4 expression is closely correlated to metastasis of nasopharyngeal carcinoma.                                                                                                                                                                        |
| CXCR4 | 7852 | 19784070 | Findings indicate that PAUF enhances the metastatic potential of pancreatic cancer cells, at least in part, by upregulating CXCR4 expression.                                                                                                            |
| CXCR4 | 7852 | 19825996 | Our results suggest that the phenotypic knockout strategy of CXCR4 using a novel recombinant protein TAT/54R/KDEL might be a possible approach for inhibiting relative tumor metastasis mediated by CXCR4/CXCL12 interaction.                            |
| CXCR4 | 7852 | 19859817 | These findings implicate the CXCR4-CXCL12 axis in the metastasis of renal cell carcinoma.                                                                                                                                                                |
| CXCR4 | 7852 | 19885584 | CXCR4 nuclear localization follows binding of its ligand SDF-1 and occurs in metastatic but not primary renal cell carcinoma                                                                                                                             |
| CXCR4 | 7852 | 19921580 | Shikonin may also play a role in anti-metastasis via down-regulating the expression of CXCR4 and reducing the CXCL12-induced migratory response in colorectal carcinoma cells.                                                                           |
| CXCR4 | 7852 | 20439195 | We studied a unique cohort of 21 primary lung cancers with matched adrenal metastases for the expression of CX3CR1, CXCR4, CCR6, and CCR7                                                                                                                |
| CXCR4 | 7852 | 20460402 | The CXCR4-SDF1 axis has an important role in epithelial ovarian carcinoma (EOC) metastasis by a mechanism that targets EOC metastasis.                                                                                                                   |
| CXCR4 | 7852 | 20484957 | Pancreatic stellate cells can secrete SDF-1 and increase the invasion of pancreatic cancer cells through the SDF-1/CXCR4 axis.                                                                                                                           |
| CXCR4 | 7852 | 20492653 | CXCR4 is expressed on breast cancer cells and exposure to hypoxia upregulated this expression, increasing migratory and invasive potential.                                                                                                              |
| CXCR4 | 7852 | 20563655 | stromal derived factor-1 (SDF-1) and chemokine receptor (CXCR4) have roles in bone metastasis of renal carcinoma                                                                                                                                         |
| CXCR4 | 7852 | 20578990 | In patients with renal cell carcinoma, level of CXCR4 and CXCR7 expression in tumor tissue correlated with disease free survival and lymphatic metastasis; higher CXCR4 and CXCR7 expression predicts earlier relapse.                                   |
| CXCR4 | 7852 | 20603605 | Data suggest that that ITF2 is one of the CXCR4 targets, which is involved in CXCR4-dependent tumor growth and invasion of breast cancer cells.                                                                                                          |

|       |      |          |                                                                                                                                                                                                                                                          |
|-------|------|----------|----------------------------------------------------------------------------------------------------------------------------------------------------------------------------------------------------------------------------------------------------------|
| CXCR4 | 7852 | 20723431 | Increased protein expressions of nuclear CXCR4, VEGF-C, and CK-19 are independent risk factors for developing lymph node metastasis in hepatocellular carcinoma.                                                                                         |
| CXCR4 | 7852 | 20953377 | HIF-1, CXCR4, and VEGF high expression levels in colon cancer were correlated positively with TNM stage, lymph node involvement, and distant metastasis.                                                                                                 |
| CXCR4 | 7852 | 21059341 | NF-kappaB-regulated CXCL12/CXCL4 autocrine system is essentially involved in the invasiveness of ovarian cancer.                                                                                                                                         |
| CXCR4 | 7852 | 21080209 | Enoxaparin (LMWH) inhibits the formation of hepatic metastasis of colon cancer by disrupting the interaction of CXCR4 and CXCL12.                                                                                                                        |
| CXCR4 | 7852 | 21087342 | CXC chemokine receptor 4 (CXCR4) was found to be expressed in many tumors and significantly correlated with invasion, angiogenesis, metastasis, and prognosis.                                                                                           |
| CXCR4 | 7852 | 21454012 | suppression of CXCR4 inhibits EGFRvIII-mediated breast cancer cell invasion and proliferation                                                                                                                                                            |
| CXCR4 | 7852 | 21468602 | The high in vitro metastatic potential of human bladder carcinoma cell sublines is closely associated with increased CXCR4 expression.                                                                                                                   |
| CXCR4 | 7852 | 21527066 | The expressions of CXCL12/CXCR4 and CXCL16/CXCR6 were significantly higher in epithelial ovarian carcinomas than in normal epithelial ovarian tissues or benign epithelial ovarian tumors. Expression of CXCR4 was related to lymph node metastasis.     |
| CXCR4 | 7852 | 21630055 | CXCL12 and CXCR4 are related to formation of gastric tumors and lymph node metastasis                                                                                                                                                                    |
| CXCR4 | 7852 | 21633638 | CXCR4/SDF-1 axis is involved in lymph node metastasis of gastric carcinoma.                                                                                                                                                                              |
| CXCR4 | 7852 | 21738044 | CXC chemokine receptor 4 plays a critical role in the metastasis of human ovarian cancer possibly through modulating the Wnt/beta-catenin pathway.                                                                                                       |
| CXCR4 | 7852 | 21831961 | These results indicated that PEA3 could activate CXCR4 promoter transcription and promote breast cancer metastasis.                                                                                                                                      |
| CXCR4 | 7852 | 21934106 | signaling-selective inhibition of the CXCR4-Galpha(13)-Rho axis prevents the metastatic spread of basal-like breast cancer cells.                                                                                                                        |
| CXCR4 | 7852 | 22075627 | CXCR4 expression in metastatic liver tumors together with the upregulation of CXCL12 in hepatocytes may help to predict the clinical outcomes of patients with CLM after hepatectomy                                                                     |
| CXCR4 | 7852 | 22152016 | CXCR4 and CXCR7 play different roles in metastasis, with CXCR4 mediating breast cancer invasion and CXCR7 impairing invasion but enhancing primary tumor growth through angiogenesis.                                                                    |
| CXCR4 | 7852 | 22200669 | Loss of breast cancer metastasis suppressor 1 promotes ovarian cancer cell metastasis by increasing chemokine receptor 4 expression.                                                                                                                     |
| CXCR4 | 7852 | 22266857 | CXCR7+ cells promote growth and metastasis of CXCR4+ breast cancer cells.                                                                                                                                                                                |
| CXCR4 | 7852 | 22299827 | ED is a novel blocker of CXCR4 expression and, thus, has enormous potential as a powerful therapeutic agent for metastatic cancer.                                                                                                                       |
| CXCR4 | 7852 | 22377565 | CXCR4 is a strong independent prognostic biomarker associated with distant metastatic recurrence in pancreatic adenocarcinoma.                                                                                                                           |
| CXCR4 | 7852 | 22430135 | These findings suggest a possible role for the CXCL12/CXCR4 axis in the metastatic evolution of non-small-cell lung cancer                                                                                                                               |
| CXCR4 | 7852 | 22463589 | High CXCR4 expression correlates with a poor response to sunitinib in metastatic renal cancer.                                                                                                                                                           |
| CXCR4 | 7852 | 22490156 | Elevated levels of CXCR4 and MMP-9 are found in small cell lung cancer tissues. CXCR4 expression might be correlated with bone metastasis. CXCR4 is an independent prognostic factor for disease-free survival in SCLC.                                  |
| CXCR4 | 7852 | 22689289 | Both CXCR3 and CXCR4 are involved in metastasis of colorectal cancer to lymph nodes, lungs and liver.                                                                                                                                                    |
| CXCR4 | 7852 | 22871210 | Flow cytometry analysis was performed to detect distinct subsets with CD133 and CXCR4 markers in human primary and metastatic CRC tissues. In human specimens, CD133(+)CXCR4(+) cells were higher in liver metastases than in primary colorectal tumors. |

|       |      |          |                                                                                                                                                                                                                                                               |
|-------|------|----------|---------------------------------------------------------------------------------------------------------------------------------------------------------------------------------------------------------------------------------------------------------------|
| CXCR4 | 7852 | 22902648 | CXCR4 is essential for ovarian tumor cell proliferation and invasion.                                                                                                                                                                                         |
| CXCR4 | 7852 | 23023480 | hypoxia upregulates CXCR4 in gastric cancer cells in a HIF-1alpha-dependent manner, and upregulation of CXCR4 plays a role in cancer cell migration and invasion                                                                                              |
| CXCR4 | 7852 | 23259294 | SDF-1 and CXCR4 protein are highly expressed in laryngocarcinoma and in metastatic lymph node tissue. Expression is correlated with lymph node metastasis, clinical stage and pathological grading.                                                           |
| CXCR4 | 7852 | 23468933 | nuclear CXCR4 may be a mechanism underlying prostate cancer recurrence, increased metastatic ability and poorer prognosis after tumors have been treated with therapy that targets plasma membrane CXCR4                                                      |
| CXCR4 | 7852 | 23472069 | up-regulation of TPST-1 and tyrosine sulfation of CXCR4 by LMP1 might be a potential mechanism contributing to nasopharyngeal carcinoma metastasis                                                                                                            |
| CXCR4 | 7852 | 23591873 | findings indicate that a chemokine-controlled pathway, consisting of Galphai2, ELMO1/Dock180, Rac1 and Rac2, regulates the actin cytoskeleton during breast cancer metastasis                                                                                 |
| CXCR4 | 7852 | 23647548 | TRAIL-induced miR-146a expression suppresses CXCR4-mediated human breast cancer migration.                                                                                                                                                                    |
| CXCR4 | 7852 | 23744532 | Expression of miR-126 inhibited colon cancer cell viability and reduced tumor cell migration and invasion capacity by its negative regulation of CXCR4 expression.                                                                                            |
| CXCR4 | 7852 | 23765204 | High CXCR4 expression is associated with invasive squamous cell vulvar cancers.                                                                                                                                                                               |
| CXCR4 | 7852 | 23777983 | Our results show CD133(+) and CD133(+)CXCR4(+) cancer cells correlate with the presence of lymph node metastasis in colorectal cancer.                                                                                                                        |
| CXCR4 | 7852 | 23800042 | CXCR4 silencing by siRNA could suppress the proliferation, invasion and metastasis of esophageal carcinoma cell lines.                                                                                                                                        |
| CXCR4 | 7852 | 23827153 | The expression of chemokine receptor CXCR4 was up-regulated in the tissue with breast cancer bone metastasis.                                                                                                                                                 |
| CXCR4 | 7852 | 23845465 | Early genetic events such as the loss of RANKL and the gain of CXCR4 expressions probably facilitate the metastatic progression concomitant with the primary tumor establishment.                                                                             |
| CXCR4 | 7852 | 23868972 | Immunohistochemical analysis of human breast tumor tissues shows a significant increase of PRG expression in the invasive areas of the tumors, suggesting that this RhoGEF is associated with breast tumor invasion in vivo                                   |
| CXCR4 | 7852 | 23921147 | integrin-mediated cell-ECM interactions can modulate tumor cell morphology, and regulate the expression of chemokine receptors CXCR7 and CXCR4 which are associated with the invasive phenotype and progression of prostate cancer.                           |
| CXCR4 | 7852 | 23924922 | SDF-1alpha acts through CXCR4 to induce ovarian cancer cell migration, which could be facilitated by CD40 activation.                                                                                                                                         |
| CXCR4 | 7852 | 24025971 | CXCL12 and CXCR4 have a single ligand-single receptor relationship in mediating non-small cell lung cancer migration and metastasis, and in context of NSCLC that expresses CXCR4, the CXCR4-CXCL12 axis is not involved in angiogenesis of the primary tumor |
| CXCR4 | 7852 | 24101191 | This retrospective study shows that a high expression of CXCR4 in breast cancer is associated with earlier distant metastasis and bone metastasis in breast cancer                                                                                            |
| CXCR4 | 7852 | 24175834 | High CXCR4 expression promotes proliferation and invasion of pancreatic cancer.                                                                                                                                                                               |
| CXCR4 | 7852 | 24238971 | In colorectal cancer with liver metastasis, CXCR4 expression demonstrated associations with local progression, liver metastasis, and poor overall survival.                                                                                                   |
| CXCR4 | 7852 | 24256053 | Aberrant expression of CXCR4 significantly contributes to metastasis and predicts poor clinical outcome in breast cancer.                                                                                                                                     |
| CXCR4 | 7852 | 24288553 | Overexpression of HIF-2alpha, TWIST, and CXCR4 is associated with lymph node metastasis in papillary thyroid carcinoma.                                                                                                                                       |

|        |      |          |                                                                                                                                                                                                                              |
|--------|------|----------|------------------------------------------------------------------------------------------------------------------------------------------------------------------------------------------------------------------------------|
| CXCR4  | 7852 | 24318902 | miR-139 targets CXCR4 and inhibits proliferation and metastasis of laryngeal squamous carcinoma cells                                                                                                                        |
| CXCR4  | 7852 | 24378831 | S100A4, FOS and CXCR4, playing a major role in tumor progression and metastasis, are downregulated by sorafenib.                                                                                                             |
| CXCR4  | 7852 | 24390633 | these results demonstrate considerable potential of high-affinity CXCR4-blocking agents for OS tumor cell homing suppressive treatment in metastasizing OS complementary to current (neo)-adjuvant chemotherapy.             |
| CXCR4  | 7852 | 24472670 | These data suggest that CXCR4 inhibition by CTCE-9908 decreases the invasion potential in vitro, which then translated to a reduction of tumor spread with associated reduction in angiogenesis.                             |
| CXCR4  | 7852 | 24475985 | Overexpression of CXCR4 was significantly associated with lymph node status and distant metastasis and indicated poor overall and disease free survival in breast cancer patients.                                           |
| CXCR4  | 7852 | 24590865 | Breast cancer nodal metastasis correlates with tumour and lymph node methylation profiles of Caveolin-1 and CXCR4.                                                                                                           |
| FXR1   | 8087 | 23881279 | FXR1 and UPF1 may have a functional role in prostate cancer progression and metastasis.                                                                                                                                      |
| IRS2   | 8660 | 17030631 | Transgenic mice overexpressing IRS2 in the mammary gland show progressive mammary hyperplasia, tumorigenesis and metastasis.                                                                                                 |
| IRS2   | 8660 | 17361103 | This review points out that IRS-2, which is implicated in mediating signals to promote tumor cell survival, growth and motility, is a positive regulator of breast cancer metastasis.                                        |
| KRT75  | 9119 | 21427063 | we observed a possible association between CK5/6 expression in the primary tumor and multiple versus solitary breast carcinoma brain metastasis                                                                              |
| RABEP1 | 9135 | 21271679 | Breast cancer cell line studies showed that microRNA, miR-373, was capable of promoting breast cancer invasion and metastasis via translational inhibition of TXNIP and RABEP1 that were the direct target genes of miR-373. |
| NUMBL  | 9253 | 23440423 | Numbl-Klf4 signaling is critical to maintain multiple nodes of metastatic progression, including persistence of cancer-initiating cells.                                                                                     |
| NUMBL  | 9253 | 23681800 | Numbl might be involved in the inhibition of growth, proliferation, and invasion of 95-D lung cancer cells.                                                                                                                  |
| MAGED1 | 9500 | 17140727 | studies indicate for the first time that NRAGE could suppress metastasis of melanoma and pancreatic cancer probably through downregulation of MMP-2                                                                          |
| MAGED1 | 9500 | 21109781 | we establish the roles for Dlxin-1, one as an anti-tumorigenic and anti-invasive protein in high-grade gliomas and the other as an inducer of differentiation of glioma stem cells.                                          |
| IQSEC1 | 9922 | 18084281 | Results indicate that GEP100 links EGFR signalling to Arf6 activation to induce invasive activities of some breast cancer cells, and hence may contribute to their metastasis and malignancy.                                |
| IQSEC1 | 9922 | 21858086 | Data suggest that GEP100-Arf6-AMAP1-cortactin pathway, activated by VEGFR2, appears to be common in angiogenesis and cancer invasion and metastasis, and provides their new therapeutic targets.                             |
| IQSEC1 | 9922 | 21966491 | Cinical study indicates that co-overexpression of Her2 with GEP100 in primary lung adenocarcinomas of patients is correlated with the presence of their node-metastasis with a statistical significance.                     |
| IQSEC1 | 9922 | 22662237 | GEP100 plays a significant role in pancreatic cancer invasion through regulating the expression of E-cadherin and the process of mesenchymal to epithelial transition (MET).                                                 |
| IQSEC1 | 9922 | 23747719 | GEP100 regulates an Arf6/ERK/uPAR signaling cascade in EGF-induced breast cancer cell invasion.                                                                                                                              |

|         |       |          |                                                                                                                                                                                                                      |
|---------|-------|----------|----------------------------------------------------------------------------------------------------------------------------------------------------------------------------------------------------------------------|
| MAGEC1  | 9947  | 12115486 | Overexpression of MAGE-C1 is associated with mammary gland and ovary, non small cell lung carcinoma and metastatic melanoma                                                                                          |
| MAGEC1  | 9947  | 20696919 | Peripheral blood mononuclear cells from 26 metastatic melanoma patients expressing CT7 in their tumor lesions were analyzed for CT7-specific T-cell responses using overlapping peptides.                            |
| IKZF1   | 10320 | 22859015 | Ikaros is expressed at high levels in human ovarian cancer. Ikaros inhibits proliferation and, through upregulation of Slug, increases metastatic ability of ovarian serous adenocarcinoma cells.                    |
| MYBBP1A | 10514 | 22339894 | We provide experimental evidence that MYBBP1A is an important molecular switch in the regulation of tumor cell proliferation versus migration in head and neck squamous cell carcinoma cells.                        |
| NMU     | 10874 | 16878152 | Overexpression of neuromedin U is associated with bladder tumor formation, lung metastasis and cancer cachexia                                                                                                       |
| NMU     | 10874 | 19118941 | NmU may be involved in the HGF-c-Met paracrine loop regulating cell migration, invasiveness and dissemination of pancreatic ductal adenocarcinoma.                                                                   |
| NMU     | 10874 | 24876102 | our results defined NmU as a candidate drug response biomarker for HER2-overexpressing cancers and as a candidate therapeutic target to limit metastatic progression and improve the efficacy of HER-targeted drugs. |
| AKAP13  | 11214 | 22161024 | Amplification of AKAP-13 is associated with metastatic and aggressive papillary thyroid carcinomas.                                                                                                                  |
| STAB1   | 23166 | 21368224 | CLEVER-1/stabilin-1 can support lymphocyte transendothelial migration; it also may provide an organ-specific signal for regulatory T cell recruitment to the inflamed liver and to hepatocellular carcinoma.         |
| TPSG1   | 25823 | 20126998 | tryptase promotes breast cancer migration and invasion.                                                                                                                                                              |
| PTPN23  | 25930 | 21724833 | loss of PTPN23 may increase the activity of SRC and the phosphorylation status of the E-cadherin/beta-catenin signaling complex to promote tumor growth and invasive behavior in breast cancer                       |
| SERBP1  | 26135 | 17698176 | In ovarian cancer, PAI-RBP1 is significantly overexpressed in tumor epithelial cells, suggesting a biological role in tumor invasion and metastasis. Its expression is higher in advanced disease.                   |
| MYOF    | 26509 | 22135466 | MYOF plays a previously unrecognized role in cancer cell invasion.                                                                                                                                                   |
| MYOF    | 26509 | 22761893 | suggest a novel role of MYOF in breast tumor cell invasion and a potential reversion to an epithelial phenotype upon loss of MYOF                                                                                    |
| DKK4    | 27121 | 18408752 | DICKKOPF-4 is induced by TCF/beta-catenin and upregulated in human colon cancer, promotes tumour cell invasion and angiogenesis.                                                                                     |
| DKK4    | 27121 | 21994129 | The TR/DKK4/Wnt/beta-catenin cascade influences the proliferation and migration of hepatoma cells during the metastasis process and support a tumor suppressor role of the thyroid hormone receptor.                 |
| BRD7    | 29117 | 22008115 | Data indicate that BRD7 may be related to the occurrence, development, and metastasis of lung cancers.                                                                                                               |
| CARD10  | 29775 | 17724468 | Protein kinase C-CARMA3 signaling axis plays an essential role in lysophosphatidic acid-induced ovarian cancer cell in vitro invasion.                                                                               |
| CARD10  | 29775 | 24633921 | CARMA3 is overexpressed in pancreatic cancer and regulates malignant cell growth, invasion, and NF-kappaB signaling, which was dependent on its association with Bcl10.                                              |
| REPIN1  | 29803 | 24285725 | there is a p53-induced double-negative feedback loop involving miR-15a/16-1 and AP4 that stabilizes epithelial and mesenchymal states, respectively, which may determine metastatic prowess in colorectal cancer     |

|        |       |          |                                                                                                                                                                                                                                                     |
|--------|-------|----------|-----------------------------------------------------------------------------------------------------------------------------------------------------------------------------------------------------------------------------------------------------|
| ASAP1  | 50807 | 18400762 | ASAP3 functions nonredundantly with ASAP1 to control cell movement and may have a role in cancer cell invasion.                                                                                                                                     |
| ASAP1  | 50807 | 18519696 | study suggests that the ASAP1 gene plays a role in prostate cancer metastasis and may represent a therapeutic target and/or biomarker for metastatic disease                                                                                        |
| ASAP1  | 50807 | 21858086 | Data suggest that GEP100-Arf6-AMAP1-cortactin pathway, activated by VEGFR2, appears to be common in angiogenesis and cancer invasion and metastasis, and provides their new therapeutic targets.                                                    |
| ASAP1  | 50807 | 24427349 | results indicated that elevated expression of ASAP1 plays an important role in the progression and metastasis of ovarian cancer                                                                                                                     |
| TMEM8B | 51754 | 12918109 | down-regulation may be closely associated with tumorigenesis and metastasis of colorectal carcinoma; may not contribute to development and progression of gastric carcinoma.                                                                        |
| TMEM8B | 51754 | 17641538 | We demonstrated the subcellular localization and the effect of NGX6 and its mutants on the growth, proliferation, migration, or adhesion of nasopharyngeal carcinoma 5-8F cells.                                                                    |
| TMEM8B | 51754 | 19755717 | NGX6a was significantly downregulated in nasopharyngeal carcinoma and is associated with tumor metastasis.                                                                                                                                          |
| TMEM8B | 51754 | 20543461 | The short transcript of NGX6 play an important role in colorectal cancer, and reduced expression may contribute to metastasis.                                                                                                                      |
| TMEM8B | 51754 | 22647848 | Data suggest that nasopharyngeal carcinoma-associated gene 6 (NGX6) may inhibit colon cancer through the regulation of proteins involved in cell proliferation, metastasis, apoptosis, cytoskeletal structure, metabolism, and signal transduction. |
| TLR9   | 54106 | 17373717 | TLR9-mediated invasion may represent a novel mechanism through which infections promote prostate cancer.                                                                                                                                            |
| TLR9   | 54106 | 17986857 | Functional expression of TLR9 is associated to the metastatic potential of human lung cancer cell.                                                                                                                                                  |
| TLR9   | 54106 | 18922969 | TLR9 expression is increased in breast cancer and CpG oligonucleotide-induced cellular invasion is mediated via TLR9 and TRAF6, independent of MyD88.                                                                                               |
| TLR9   | 54106 | 19618291 | TLR9 up-regulates COX-2 expression in prostate cancer cells, at least partially through the activation of NF-kappaB, which may be implicated in tumor invasion and metastasis.                                                                      |
| TLR9   | 54106 | 21391743 | Lymph node metastasis more likely occur in breast cancer patients with a positive TLR9 status and its expression might serve as an indicator of poor prognosis in patients with breast cancer.                                                      |
| TLR9   | 54106 | 21448350 | The gene of TLR9 is correlated with the invasive and metastatic potential of human pancreatic carcinoma, and CPG ODN2216 induces the inhibition of migration and invasion of Panc-1 cells.                                                          |
| TLR9   | 54106 | 21607583 | Expression of TLR9 isoforms A and B can be detected in clinical breast cancer specimens. The ERalpha and sex steroid hormones regulate TLR9 expression and invasive effects in the breast cancer cells.                                             |
| KRT20  | 54474 | 12515621 | The detection of cancer metastasis in the lymph nodes in colon carcinoma is almost doubled (21.9% vs 11.1%) by CK-20 mRNA                                                                                                                           |
| KRT20  | 54474 | 17240035 | Dysregulation of CK20 expression is an early event in the carcinogenesis of papillary noninvasive bladder cancer.                                                                                                                                   |
| KRT20  | 54474 | 18069772 | Positive CK20 RT-PCR, depth of tumor invasion, lymph node status, metastasis and microvessel density are significantly correlated with vascular invasion.                                                                                           |
| KRT20  | 54474 | 18705345 | Micrometastases of gastric cancer can be detected in circulating peripheral blood using quantitative real-time RT-PCR. CK19 is a better marker than CK18, CK20 and CEA.                                                                             |
| KRT20  | 54474 | 19098678 | It can be helpful in cases with metastatic rectal carcinoma, especially those with CK7+/CK20+ or CK20-/CK7- immunophenotype.                                                                                                                        |

|         |       |          |                                                                                                                                                                                                                                                             |
|---------|-------|----------|-------------------------------------------------------------------------------------------------------------------------------------------------------------------------------------------------------------------------------------------------------------|
| KRT20   | 54474 | 20395351 | CK20 and VEGF expressions in peripheral blood of colorectal carcinoma patients are promising molecular markers for disease progression and metastasis.                                                                                                      |
| KRT20   | 54474 | 20574624 | Case Report: CK7+/CK20- Merkel cell carcinoma presenting as inguinal subcutaneous nodules with subsequent epidermotropic metastasis.                                                                                                                        |
| KRT20   | 54474 | 21938557 | positivity rates of CK19 and CK20 in transverse mesocolon were 48.6 and 61.2%, respectively and increased with the depth of tumor invasion                                                                                                                  |
| KRT20   | 54474 | 22752373 | High cytokeratin 20 mrna expression is associated with lymphatic metastasis in colon cancer.                                                                                                                                                                |
| KRT20   | 54474 | 24403457 | High cytokeratin 20 expression is associated with invasive histological phenotype in poorly differentiated colorectal adenocarcinoma.                                                                                                                       |
| RNF111  | 54778 | 23467611 | findings indicate that Arkadia is not critical for regulating tumor growth per se, but is required for the early stages of cancer cell colonization at the sites of metastasis                                                                              |
| TRPM7   | 54822 | 22871386 | Findings suggest that TRPM7 is part of a mechanosensory complex adopted by cancer cells to drive metastasis formation in breast cancer.                                                                                                                     |
| TRPM7   | 54822 | 23353055 | TRPM7 regulates migration and invasion of metastatic breast cancer cells via MAPK pathway.                                                                                                                                                                  |
| ANO1    | 55107 | 22912841 | Enhanced expression of ANO1 in head and neck squamous cell carcinoma causes cell migration and correlates with poor prognosis.                                                                                                                              |
| ANO1    | 55107 | 23866066 | As the different TMEM16A isoforms do not affect proliferation or migration and do not associate with tumors, our results suggest that the resulting channel activities are not directly involved in cell growth and motility.                               |
| ANO1    | 55107 | 24825187 | investigated whether DOG1 plays a role in cell migration, apoptosis, proliferation and viability in gastrointestinal stromal tumors                                                                                                                         |
| FBXW7   | 55294 | 22270966 | miR-223 targets FBXW7/hCdc4 expression at the post-transcriptional level and appears to regulate cellular apoptosis, proliferation, and invasion in gastric cancer.                                                                                         |
| CCDC88A | 55704 | 19211784 | provides the structural and biochemical basis for the prometastatic features of GIV, making the functional disruption of this unique G alpha i-GIV interface a promising target for therapy against cancer metastasis                                       |
| CCDC88A | 55704 | 20462955 | Data show that inclusion or exclusion of GIV's GEF motif, which activates Galphai, modulates EGFR signaling, generates migration-proliferation dichotomy, and most likely influences cancer progression.                                                    |
| CCDC88A | 55704 | 20974669 | It was concluded that GIV-fl is a novel metastasis-related protein and an independent adverse prognosticator that may serve as a useful adjunct to traditional staging strategies in colorectal carcinoma.                                                  |
| CCDC88A | 55704 | 22116776 | Girdin protein may be a potential new distant metastasis biomarker of breast cancer                                                                                                                                                                         |
| CCDC88A | 55704 | 22714912 | The Girdin protein may be a potential new early liver metastasis biomarker of colorectal cancer.                                                                                                                                                            |
| CCDC88A | 55704 | 24326843 | Up-regulated autophagy was negatively associated with Girdin level. There was a significant correlation between Girdin expression and lymph nodes metastasis in invasive ductal breast carcinoma.                                                           |
| EXOC2   | 55770 | 22761837 | We identified interactions between RalA and its effectors sec5 and exo84 in the Exocyst complex as directly necessary for migration and invasion of prostate cancer tumor cells.                                                                            |
| ADAMTS9 | 56999 | 18449890 | ADAMTS9 expression was downregulated or lost in 17 of 23 (73.9%) lymph node metastatic nasopharyngeal carcinoma (NPC) specimens. After transfection of the ADAMTS9 gene into 7 NPC cell lines, a dramatic reduction of colony forming ability was observed. |
| MKL1    | 57591 | 24084383 | results provided novel evidence supporting the metastasis-promoting functions of MRTF-A, and implied that MRTF-A might be a switch for the estrogen pathway to change its proliferation-promoting roles into migration-stimulating roles in breast cancer   |
| MKL1    | 57591 | 24189459 | Overexpression of SMYD3 promotes MRTF-A-mediated upregulation of MYL9 and migration of MCF-7 breast cancer cells                                                                                                                                            |

|          |        |          |                                                                                                                                                                                                                                                              |
|----------|--------|----------|--------------------------------------------------------------------------------------------------------------------------------------------------------------------------------------------------------------------------------------------------------------|
| ZNF350   | 59348  | 19996286 | Our findings suggest that ZBRK1 acts to inhibit metastasis of cervical carcinoma, perhaps by modulating MMP9 expression.                                                                                                                                     |
| CDH23    | 64072  | 22413011 | cadherin-23 is up-regulated in breast cancer tissue versus normal tissue and we propose that cadherin-23-mediated heterotypic adhesion between invading tumor cells and stromal fibroblasts may play a role in the metastatic cascade.                       |
| CSMD1    | 64478  | 19669408 | Reduction of CSMD1 expression significantly associated with high tumour grade and decreased overall survival in invasive ductal breast carcinoma                                                                                                             |
| MMP28    | 79148  | 21615884 | MMP28 is frequently overexpressed during progression of gastric carcinoma, and contributes to tumor cell invasion and metastasis.                                                                                                                            |
| MMP28    | 79148  | 23803888 | Inhibition of BCMO1 expression is associated with increased invasiveness of colon cancer cells and increased expression of MMP7 and MMP28. beta-Carotene can upregulate BCMO1 and reverse these effects.                                                     |
| MUS81    | 80198  | 21187482 | Mus81 down-regulation correlated significantly to invasion depth (p = 0.015) and poorly-differentiated type (p = 0.016) of gastric cancer.                                                                                                                   |
| ADAM33   | 80332  | 19265133 | ADAM33 has a key role in gastric cancer pathogenesis by up-regulating the interleukin (IL)-18 secretion process, which results in increased cell migration and proliferation.                                                                                |
| ADAM33   | 80332  | 19267929 | We suggest that ADAM33 promoter methylation may be a useful molecular marker for differentiating invasive lobular carcinoma and invasive ductal carcinoma                                                                                                    |
| ANKRD30A | 91074  | 17536312 | testing demonstrates NY-BR-1 in a mostly focal fashion in the epithelia of ducts and acini of the mammary gland. In tumors, homogenous staining can be seen in almost all ductal carcinomas in situ and/or the intraductal component of invasive carcinomas. |
| MUC16    | 94025  | 14566828 | value of this tumor marker regarding relapse, metastasis and death in resectable non-small cell lung cancer                                                                                                                                                  |
| MUC16    | 94025  | 14676194 | might contribute to the metastasis of ovarian cancer to the peritoneum by initiating cell attachment to the mesothelial epithelium via binding to mesothelin                                                                                                 |
| MUC16    | 94025  | 17067392 | MUC16-Mesothelin binding is a high affinity, N-glycan dependent interaction that facilitates peritoneal metastasis of ovarian tumors.                                                                                                                        |
| MUC16    | 94025  | 18042071 | The frequency of expression of Ca125...in invasive micropapillary carcinomas...was similar to the results in unselected mammary carcinoma.                                                                                                                   |
| MUC16    | 94025  | 18317225 | In ovarian metastases from undiagnosed colorectal adenocarcinomas, elevated CA-125 levels and frequent coexpression of cytokeratin 7 are features that can contribute to misclassification of these metastases as primary ovarian neoplasms.                 |
| MUC16    | 94025  | 19270645 | Invasive micropapillary carcinoma more commonly showed immunoreactivity for MUC1, CA125, and Her2Neu compared to invasive urothelial carcinoma with retraction artifact                                                                                      |
| MUC16    | 94025  | 20090516 | adenocarcinomas with MUC16 expression may have an increased risk for metastases to pleura/peritoneum but not the leptomeninges or brain                                                                                                                      |
| MUC16    | 94025  | 21421261 | Ectopic expression of the MUC16CTD enhances SKOV3 tumor cell growth, colony formation in soft agar and enhances tumor growth and metastases in SCID mice.                                                                                                    |
| MUC16    | 94025  | 21836488 | Describe CA125 immunoreactivity in 8 of 10 metastatic mucinous carcinomas arising after a diagnosis of primary ovarian mucinous carcinoma or mucinous borderline tumor of the intestinal type in which the primary neoplasms were mostly negative.           |
| MUC16    | 94025  | 22727919 | Data suggest that preoperative serum CA-125 can be used as a significant independent predictor of advanced stage of endometrial carcinoma as well as lymph node metastases.                                                                                  |
| MUC16    | 94025  | 23915849 | STIP1 histoscores may be useful in detecting invasive human ovarian cancer in patients with low serum CA125 levels.                                                                                                                                          |
| JDP2     | 122953 | 20677166 | JDP2 expression was downregulated in pancreatic carcinoma & this correlated with metastasis & decreased post-surgery survival.                                                                                                                               |
| CCDC67   | 159989 | 22610074 | suggest that CCDC67 is a putative tumor suppressor gene that is silenced in gastric cancers by promoter CpG methylation and that it may play an important role in                                                                                            |



---

cell signaling and migration related to tumorigenesis

|        |        |          |                                                                                                                                                                                                      |
|--------|--------|----------|------------------------------------------------------------------------------------------------------------------------------------------------------------------------------------------------------|
| VWCE   | 220001 | 19413886 | Data suggest that URG11 contributes to gastric cancer growth and metastasis at least partially through activation of beta-catenin signalling pathway.                                                |
| EPHA10 | 284656 | 24403271 | EphA10 expression at both the gene and protein level in clinical breast cancer tissues is significantly associated with lymph node metastasis as well as stage progression.                          |
| MACC1  | 346389 | 21093878 | Metastasis associated in colon cancer 1 gene overexpression may be a useful marker for predicting postoperative recurrence in patients with lung adenocarcinoma after surgery.                       |
| MACC1  | 346389 | 21447729 | Expression analysis of MET, MACC1, and HGF in metastatic colorectal cancer.                                                                                                                          |
| MACC1  | 346389 | 21498695 | MACC1 is more frequently expressed in vascular invasive hepatocellular carcinoma.                                                                                                                    |
| MACC1  | 346389 | 22179665 | Concomitant downregulation of miR-1 and increase of MACC1 can thus contribute to MET overexpression and to the metastatic behavior of colon cancer cells.                                            |
| MACC1  | 346389 | 22838389 | the identification of coding MACC1 SNPs in primary colorectal tumors does not improve the prediction for metastasis formation or for patients' survival compared to MACC1 expression analysis alone. |
| MACC1  | 346389 | 23095620 | In stage II colon cancer, MACC1 expression predicts development of metastases, outperforming microsatellite stability status, as well as KRAS/BRAF mutation status.                                  |
| MACC1  | 346389 | 23166620 | Circulating MACC1 transcripts in colorectal cancer patient plasma predict metastasis and prognosis.                                                                                                  |
| MACC1  | 346389 | 23457029 | MACC1 also promoted the proliferation, migration and invasion of both gastric cancer cell lines.                                                                                                     |
| MACC1  | 346389 | 23665971 | MACC1, a new easily detectable biomarker in cancer, is an independent prognostic factor of recurrence after liver resection of colorectal cancer metastasis.                                         |
| MACC1  | 346389 | 24124150 | MACC1 is related to colorectal cancer initiation and early-stage invasive growth.                                                                                                                    |
| MACC1  | 346389 | 24310811 | MACC1 protein and mRNA overexpression in both NSCLC tissues and cell lines is related to tumor recurrence, metastasis, and prognosis                                                                 |

---

---

## SUPPLEMENTARY REFERENCES

1. Kumar P, Henikoff S, Ng PC. Predicting the effects of coding non-synonymous variants on protein function using the SIFT algorithm. *Nat Protoc* 2009; 4: 1073-1081.
2. Adzhubei I, Jordan DM, Sunyaev SR. Predicting functional effect of human missense mutations using PolyPhen-2. *Curr Protoc Hum Genet* 2013; Chapter 7: Unit7.20.
3. Reva B, Antipin Y, Sander C. Predicting the functional impact of protein mutations: application to cancer genomics. *Nucleic Acids Res* 2011; 39: e118.
4. Gonzalez-Perez A, Lopez-Bigas N. Improving the assessment of the outcome of nonsynonymous SNVs with a consensus deleteriousness score, Condel. *Am J Hum Genet* 2011; 88: 440-449.
5. Shihab HA, Gough J, Cooper DN et al. Predicting the functional, molecular, and phenotypic consequences of amino acid substitutions using hidden Markov models. *Hum Mutat* 2013; 34: 57-65.
6. Gonzalez-Perez A, Deu-Pons J, Lopez-Bigas N. Improving the prediction of the functional impact of cancer mutations by baseline tolerance transformation. *Genome Med* 2012; 4: 89.
7. Kim TM, Jung SH, An CH et al. Subclonal Genomic Architectures of Primary and Metastatic Colorectal Cancer Based on Intratumoral Genetic Heterogeneity. *Clin Cancer Res* 2015; 21: 4461-4472.
8. Comprehensive molecular characterization of human colon and rectal cancer. *Nature* 2012; 487: 330-337.
9. Price TJ, Peeters M, Kim TW et al. Panitumumab versus cetuximab in patients with chemotherapy-refractory wild-type KRAS exon 2 metastatic colorectal cancer (ASPECCT): a randomised, multicentre, open-label, non-inferiority phase 3 study. *Lancet Oncol* 2014; 15: 569-579.
